# Supplementary material for: Deep Illumina-Based Shotgun Sequencing Reveals Dietary Effects on the Structure and Function of the Fecal Microbiome of Growing Kittens
Source: PLoS One. 2014 Jul 10;9(7):e101021. doi: 10.1371/journal.pone.0101021 (PMC4091873; doi:10.1371/journal.pone.0101021)
Supplement: Table S6 — Over-represented KEGG pathways of fecal samples from kittens fed a high-protein, low-carbohydrate or moderate-protein, moderate-carbohydrate diet. (XLSX) [file pone.0101021.s006.xlsx]

## Sheet: Methods
	Simulation Methods
	Two approaches were made to investigate the signficance of the number of signficant L4s in a L3, relative to the number of significant L4s in the Kitten 1 data
	1	Randomly sample 1338 L4s (to represent random significant) from the 6886 in our dataset, and recalculate the number significant in each L3
	2	Randomly sample the number of L4s found in a L3 (to represent random categorisation) from the 6886 in our dataset, and count how many are significant (e.g. for ko00010, randomly select samples of size 74 from 6886, and count the number of significant)
	Perform these simulations 1000 times
	Calculate the percentage of simulations that were greater than or equal to the 'Sig L4 in Pathway'
	Calculate the percentage of simulations that were less than or equal to the 'Sig L4 in Pathway'
	An L3 is signficantly over represented if the percentage of simulations that were greater than or equal to the 'Sig L4 in Pathway' is <5%, in red
	An L3 signficantly under represented if the percentage of simulations that were less than or equal to the 'Sig L4 in Pathway' is <5%, in green
	(both methods showed very similar results)

## Sheet: Key
	Key	Explanation
	L3	All Level 3s in the database
	Number in Pathway	The number of level 4s that can be categorised as level 3s in the database
	L4 Found in Pathway	The number of level 4s that can be categorised as level 3s in the kitten1 data set
	Sig L4 in Pathway	The number of level4s (of the 'L4 found in Pathway') that are signficant in the kitten1 data set
	Permute Signficant L4	This is method 1, detailed in Methods sheet
	Permute L3 Categories	This is method 2 above, detailed in Methods sheet
	%Simulations >= #L4 Sig	The percentage of 1000 simulations that had greater than or equal to the actual number of L4s found signficant in that L3
	%Simulations <=#L4 Sig	The percentage of 1000 simulations that had less than or equal to the actual number of L4s found signficant in that L3
	#Over represented	L3s that have signficant (<5%) over representation, highlighted in red
	#Under represented	L3s that have signficant (<5%) under representation, highlighted in green
	Total	The total number of L3s that have significant over or under representation
	Criteria for #L4 found in pathway	To adjust the number of L4s that we have identified in an L3 as cut-off criteria, X, to evaluate the number of L3s over or under represented
	Total where #L4 found >= X	The total number of L3s that have significant over or under representation, where the number of L4s found in our dataset categorised as L3 is above X
	#NA	Simulation couldn't be perfomed as there are no L4s in the Kitten dataset in this L3

## Sheet: Simulation Results int and main
				Using all signficant KOs (interactions between diet and time and main diet effects)
	Criteria for #L4 found in pathway	2		#Over represented				#Under represented
			Total	28	27			16	15
			Total where #L4 found >=2	28	27			16	15
				%Simulations >= #L4 Sig				%Simulations <=#L4 Sig
L3	Number in Pathway	L4 Found in Pathway	Sig L4 in Pathway	Permute Signficant L4	Permute L3 Categories			Permute Signficant L4	Permute L3 Categories
ko00010	80	74	15	48.4	48.1	0	0	66.2	63.2	0	0
ko00020	53	49	8	77.4	75.7	0	0	35.6	38.1	0	0
ko00030	44	48	8	75.5	73.5	0	0	39.3	40.8	0	0
ko00040	52	55	13	26.7	25.4	0	0	84	83	0	0
ko00051	67	86	19	32	30	0	0	76.8	78.8	0	0
ko00052	57	47	7	83.3	82.5	0	0	27.3	28.3	0	0
ko00053	35	29	4	85.4	83.9	0	0	29.1	30.5	0	0
ko00061	26	25	8	8.7	9.1	0	0	97	96.8	0	0
ko00062	7	1	0	100	100	0	0	77.7	80.9	0	0
ko00071	47	37	6	75.1	76.9	0	0	40.8	39.1	0	0
ko00072	8	9	2	54.6	56.1	0	0	76.9	75.4	0	0
ko00100	32	10	0	100	100	0	0	9.6	9.3	0	0
ko00120	17	2	0	100	100	0	0	63.7	65.5	0	0
ko00121	1	1	0	100	100	0	0	78.9	79.6	0	0
ko00130	41	29	2	98.8	98.5	0	0	5.4	5.6	0	0
ko00140	35	9	0	100	100	0	0	12.8	14.4	0	0
ko00190	206	107	18	77.5	77.7	0	0	31.3	29.4	0	0
ko00194	137	105	8	100	100	0	0	0	0	1	1
ko00195	63	49	7	87.6	86.6	0	0	23.9	22.4	0	0
ko00196	41	26	1	99.5	99.7	0	0	2.1	1.5	1	1
ko00199	98	2	0	100	100	0	0	61.6	67.5	0	0
ko00230	241	158	33	32.9	32.1	0	0	74.5	74.6	0	0
ko00231	9	0	0	100	#N/A	0	#N/A	100	#N/A	0	#N/A
ko00232	8	3	0	100	100	0	0	52	52.8	0	0
ko00240	153	105	30	1.6	1.3	1	1	99.4	99.3	0	0
ko00250	55	43	17	0.3	0.1	1	1	99.9	100	0	0
ko00253	18	8	3	17.2	18.2	0	0	96.3	94.1	0	0
ko00260	67	73	19	10.5	10.4	0	0	94.3	93.3	0	0
ko00270	66	59	22	0.2	0.1	1	1	99.9	100	0	0
ko00280	57	47	12	20.7	17.3	0	0	88.8	89.8	0	0
ko00281	16	17	2	87.2	87.5	0	0	36	32.1	0	0
ko00290	22	22	7	10.8	12	0	0	94.4	94.3	0	0
ko00300	40	37	12	3.2	3.4	1	1	98.5	99	0	0
ko00310	54	27	2	97.1	97.9	0	0	8.9	9.1	0	0
ko00311	14	8	3	20	19.3	0	0	94.6	95	0	0
ko00312	7	6	1	74	71.8	0	0	69.2	68.2	0	0
ko00330	128	116	31	4.4	2.7	1	1	98	98.4	0	0
ko00331	5	2	0	100	100	0	0	65.9	65.3	0	0
ko00340	39	40	7	67.2	69.1	0	0	50	46.2	0	0
ko00350	61	47	8	70.5	70.6	0	0	41.4	42.2	0	0
ko00351	7	4	0	100	100	0	0	40.6	40.2	0	0
ko00360	51	35	5	83.9	83.1	0	0	29.7	29.2	0	0
ko00361	19	21	1	98.4	98.4	0	0	6.3	6.6	0	0
ko00362	76	70	10	89.7	88.9	0	0	17.3	18	0	0
ko00363	12	16	4	38.1	38.8	0	0	82.6	82	0	0
ko00364	15	13	0	100	100	0	0	5.4	6.9	0	0
ko00380	62	34	6	67.1	64.8	0	0	50.3	51.1	0	0
ko00400	62	56	23	0	0	1	1	100	100	0	0
ko00401	40	12	3	42.2	41	0	0	81.4	80.5	0	0
ko00402	9	0	0	100	#N/A	0	#N/A	100	#N/A	0	#N/A
ko00410	34	29	7	33.3	31.6	0	0	81.9	82.3	0	0
ko00430	16	13	6	2.7	3	1	1	99.7	99.8	0	0
ko00440	27	9	7	0	0	1	1	100	100	0	0
ko00450	28	26	8	12.2	12.5	0	0	95.5	94.6	0	0
ko00460	28	13	3	48.6	48.8	0	0	76.3	75.4	0	0
ko00471	6	7	3	11.4	13.7	0	0	97.2	97.9	0	0
ko00472	2	2	0	100	100	0	0	64.3	65.5	0	0
ko00473	5	8	0	100	100	0	0	20.5	19	0	0
ko00480	38	27	4	80	79.9	0	0	35.5	37.9	0	0
ko00500	80	80	14	69.7	71.3	0	0	40.7	40.9	0	0
ko00510	44	7	1	79.4	77.6	0	0	58.8	57.7	0	0
ko00511	16	12	4	19.2	20.2	0	0	93.6	93.3	0	0
ko00512	12	0	0	100	#N/A	0	#N/A	100	#N/A	0	#N/A
ko00513	49	2	0	100	100	0	0	63.8	62.1	0	0
ko00514	28	0	0	100	#N/A	0	#N/A	100	#N/A	0	#N/A
ko00520	107	104	23	27	28	0	0	80.4	79.9	0	0
ko00521	17	16	7	1.5	2.8	1	1	99.6	99.5	0	0
ko00522	11	7	0	100	100	0	0	23.4	22.2	0	0
ko00523	32	8	5	0.9	1.6	1	1	99.8	99.7	0	0
ko00524	22	2	1	37.1	31.6	0	0	96.6	96.5	0	0
ko00531	14	10	1	88.3	87.8	0	0	40.4	36.9	0	0
ko00532	21	1	0	100	100	0	0	80.2	79.3	0	0
ko00533	14	0	0	100	#N/A	0	#N/A	100	#N/A	0	#N/A
ko00534	24	0	0	100	#N/A	0	#N/A	100	#N/A	0	#N/A
ko00535	48	0	0	100	#N/A	0	#N/A	100	#N/A	0	#N/A
ko00540	30	30	13	0.1	0.2	1	1	99.9	100	0	0
ko00550	37	40	9	37.5	37.7	0	0	77.4	75.3	0	0
ko00561	65	38	8	44.8	46.4	0	0	71.6	68.5	0	0
ko00562	45	18	5	25.6	26.4	0	0	88.1	88.7	0	0
ko00563	26	2	0	100	100	0	0	65.2	66.5	0	0
ko00564	83	39	10	21.1	20.7	0	0	89	89.8	0	0
ko00565	17	5	0	100	100	0	0	32.5	33.7	0	0
ko00590	29	5	1	65.7	67.8	0	0	75.4	75.6	0	0
ko00591	13	8	1	81.1	82.1	0	0	54	52.3	0	0
ko00592	16	3	0	100	100	0	0	53.7	51.9	0	0
ko00600	40	14	2	79.1	78.1	0	0	47.4	47.5	0	0
ko00601	25	1	0	100	100	0	0	81.4	81.6	0	0
ko00603	14	3	2	10.2	7.2	0	0	99.3	99.3	0	0
ko00604	14	1	1	20.6	19.1	0	0	100	100	0	0
ko00620	73	72	16	30.5	31.8	0	0	79.4	77.8	0	0
ko00621	13	13	3	48.5	46.4	0	0	78.8	77	0	0
ko00622	20	17	2	88.1	86.2	0	0	32.9	31.2	0	0
ko00623	28	31	2	99.1	99.2	0	0	4	4.8	1	1
ko00624	34	29	2	98.2	98.8	0	0	6.2	5.9	0	0
ko00625	26	30	3	95.1	93.8	0	0	14.8	15.3	0	0
ko00626	28	27	6	43.9	43.5	0	0	73.7	73.5	0	0
ko00627	59	51	6	95.4	96.4	0	0	9.7	9.3	0	0
ko00630	66	66	14	40.2	40.3	0	0	70.7	70.1	0	0
ko00633	22	22	0	100	100	0	0	0.7	0.8	1	1
ko00640	66	62	16	12.4	11.5	0	0	93.2	92.9	0	0
ko00642	16	13	0	100	100	0	0	6.1	5.7	0	0
ko00643	18	13	3	48.3	46	0	0	75.6	78.3	0	0
ko00650	69	76	20	7.9	8.7	0	0	94.4	94.7	0	0
ko00660	12	12	8	0	0.1	1	1	100	100	0	0
ko00670	27	21	7	9.9	9.9	0	0	95.7	96.8	0	0
ko00680	192	188	26	99	98.2	0	0	2.4	2.7	1	1
ko00710	36	32	9	14.6	14.1	0	0	92.9	93.8	0	0
ko00720	67	74	15	47	48.4	0	0	65.6	61.3	0	0
ko00730	22	18	6	11.2	12.9	0	0	95.8	96.1	0	0
ko00740	31	23	4	67.5	69.3	0	0	51.8	53.7	0	0
ko00750	15	11	4	14.2	14.1	0	0	96.7	96.3	0	0
ko00760	35	31	11	2.7	2.7	1	1	98.9	99.3	0	0
ko00770	32	32	14	0.4	0.2	1	1	99.9	99.9	0	0
ko00780	10	9	6	0.1	0.4	1	1	100	100	0	0
ko00785	4	3	0	100	100	0	0	50.5	52.6	0	0
ko00790	28	26	3	90.1	90.2	0	0	22.1	23.6	0	0
ko00791	14	11	5	3.8	4.1	1	1	99.2	99.1	0	0
ko00830	35	6	1	70	72.8	0	0	71.1	66.5	0	0
ko00860	103	87	22	11.8	9.8	0	0	93	94.5	0	0
ko00900	35	29	12	0.3	0.4	1	1	100	99.9	0	0
ko00901	10	2	0	100	100	0	0	64.2	65	0	0
ko00902	8	1	0	100	100	0	0	80.5	83.3	0	0
ko00903	21	22	3	84.1	82.5	0	0	37.1	36.3	0	0
ko00904	33	0	0	100	#N/A	0	#N/A	100	#N/A	0	#N/A
ko00905	9	0	0	100	#N/A	0	#N/A	100	#N/A	0	#N/A
ko00906	35	23	1	99.4	99.2	0	0	4.3	5.3	1	0
ko00908	8	1	1	20.9	19.4	0	0	100	100	0	0
ko00909	19	3	0	100	100	0	0	52.8	53.4	0	0
ko00910	99	97	18	62.8	63.2	0	0	46.8	47	0	0
ko00920	32	30	8	22.1	21.6	0	0	87.7	90.2	0	0
ko00930	14	11	0	100	100	0	0	9.4	9	0	0
ko00940	25	8	1	80.8	81.9	0	0	53.3	53.5	0	0
ko00941	20	2	0	100	100	0	0	62.7	64.5	0	0
ko00942	11	0	0	100	#N/A	0	#N/A	100	#N/A	0	#N/A
ko00943	13	1	0	100	100	0	0	82.3	80.6	0	0
ko00944	12	1	0	100	100	0	0	77.5	79	0	0
ko00945	10	2	0	100	100	0	0	64.6	62.6	0	0
ko00950	37	9	3	24.6	26.2	0	0	92.4	90.7	0	0
ko00960	23	13	3	47.2	48.7	0	0	76.1	74	0	0
ko00965	3	3	0	100	100	0	0	52	50.8	0	0
ko00966	12	0	0	100	#N/A	0	#N/A	100	#N/A	0	#N/A
ko00970	64	43	17	0.4	0	1	1	99.8	100	0	0
ko00980	22	9	1	84.9	86	0	0	48.2	46.3	0	0
ko00981	11	0	0	100	#N/A	0	#N/A	100	#N/A	0	#N/A
ko00982	20	9	1	86	84.5	0	0	47.8	48.3	0	0
ko00983	22	18	5	27.1	25.9	0	0	87.9	88.1	0	0
ko01001	477	102	18	72.8	71.5	0	0	38.2	36.3	0	0
ko01002	623	184	36	52.9	52	0	0	55.2	54.5	0	0
ko01003	316	110	6	100	100	0	0	0	0	1	1
ko01004	130	86	8	99.5	99.5	0	0	1.3	0.8	1	1
ko01005	94	89	21	19.2	19.1	0	0	87.3	86.7	0	0
ko01006	45	20	4	57.5	57	0	0	65.4	65.3	0	0
ko01007	104	86	31	0	0	1	1	100	100	0	0
ko01020	69	0	0	100	#N/A	0	#N/A	100	#N/A	0	#N/A
ko01040	29	17	2	86.9	86	0	0	34.8	34.5	0	0
ko01051	2	2	0	100	100	0	0	65.8	65.2	0	0
ko01053	32	27	2	98.4	97.6	0	0	7.1	10.2	0	0
ko01055	1	3	1	50.5	49.3	0	0	92.7	90	0	0
ko01056	10	5	0	100	100	0	0	34.6	32.6	0	0
ko01057	18	8	0	100	100	0	0	19.9	18.9	0	0
ko01058	3	0	0	100	#N/A	0	#N/A	100	#N/A	0	#N/A
ko02000	606	529	108	32	29.7	0	0	71.7	74.1	0	0
ko02010	327	306	64	29.3	25.5	0	0	74.9	78.8	0	0
ko02020	322	316	42	99.7	100	0	0	0.5	0.2	1	1
ko02022	196	188	26	98.2	97.7	0	0	3.2	3.7	1	1
ko02030	26	29	6	51.5	48.6	0	0	64.8	67.9	0	0
ko02035	137	138	20	94.7	94.7	0	0	7.5	7.5	0	0
ko02040	41	41	9	42.7	41.6	0	0	72.3	73.8	0	0
ko02042	72	54	2	100	100	0	0	0.1	0	1	1
ko02044	396	338	34	100	100	0	0	0	0	1	1
ko02060	75	87	18	41.6	40.1	0	0	67.7	69.5	0	0
ko03000	809	217	36	86.4	89.7	0	0	18	16	0	0
ko03008	82	15	2	81.4	81.3	0	0	39.7	44.7	0	0
ko03009	327	76	24	0.6	0.3	1	1	99.7	99.8	0	0
ko03010	144	92	22	17.8	17.9	0	0	88.8	88	0	0
ko03011	145	92	22	17.8	14.9	0	0	88.8	88.9	0	0
ko03012	50	28	5	67.2	67.1	0	0	54	52	0	0
ko03013	132	18	0	100	100	0	0	2.1	2.2	1	1
ko03015	53	2	0	100	100	0	0	68	64.2	0	0
ko03018	75	21	7	8.6	9.1	0	0	96.8	96.2	0	0
ko03020	60	30	6	53.1	54.5	0	0	65.4	65.4	0	0
ko03022	35	5	0	100	100	0	0	33.7	36.9	0	0
ko03030	51	25	10	2	1.4	1	1	99.6	99.4	0	0
ko03032	164	60	19	0.9	2.1	1	1	99.4	99.2	0	0
ko03036	535	71	23	0.6	0.8	1	1	99.8	99.7	0	0
ko03040	120	1	1	20.1	21.1	0	0	100	100	0	0
ko03041	294	3	1	46.8	49.2	0	0	90.4	89.5	0	0
ko03050	48	4	2	18.6	19.1	0	0	97.3	97.4	0	0
ko03051	73	6	2	34.2	34.1	0	0	90.3	89.6	0	0
ko03060	39	22	8	4.3	5.3	1	0	98.5	97.6	0	0
ko03070	74	75	18	20	19.8	0	0	86.5	87.1	0	0
ko03110	227	72	16	30.2	31.7	0	0	78.6	79.4	0	0
ko03310	64	0	0	100	#N/A	0	#N/A	100	#N/A	0	#N/A
ko03320	55	10	2	60.4	60.6	0	0	67.7	70.9	0	0
ko03400	300	130	32	8.4	8.4	0	0	94.6	94.5	0	0
ko03410	41	25	4	73.9	75	0	0	46.3	44.6	0	0
ko03420	48	15	3	59.3	55.9	0	0	66.3	66.7	0	0
ko03430	45	28	12	0.4	0.2	1	1	100	100	0	0
ko03440	59	31	10	7.3	5.3	0	0	96.2	98.2	0	0
ko03450	19	3	0	100	100	0	0	54	50.2	0	0
ko04010	184	0	0	100	#N/A	0	#N/A	100	#N/A	0	#N/A
ko04011	39	1	0	100	100	0	0	80.2	81.2	0	0
ko04012	60	0	0	100	#N/A	0	#N/A	100	#N/A	0	#N/A
ko04013	17	0	0	100	#N/A	0	#N/A	100	#N/A	0	#N/A
ko04020	133	2	1	37.1	33.8	0	0	96.8	96.7	0	0
ko04030	374	3	0	100	100	0	0	52.6	51	0	0
ko04031	180	0	0	100	#N/A	0	#N/A	100	#N/A	0	#N/A
ko04040	350	2	0	100	100	0	0	64.6	65.1	0	0
ko04050	176	0	0	100	#N/A	0	#N/A	100	#N/A	0	#N/A
ko04052	146	0	0	100	#N/A	0	#N/A	100	#N/A	0	#N/A
ko04060	218	0	0	100	#N/A	0	#N/A	100	#N/A	0	#N/A
ko04062	134	0	0	100	#N/A	0	#N/A	100	#N/A	0	#N/A
ko04070	38	4	2	16.1	16.3	0	0	97.2	96.9	0	0
ko04075	43	0	0	100	#N/A	0	#N/A	100	#N/A	0	#N/A
ko04080	299	1	0	100	100	0	0	80.8	78.6	0	0
ko04090	349	10	2	61.3	62.9	0	0	69.8	67.7	0	0
ko04091	96	0	0	100	#N/A	0	#N/A	100	#N/A	0	#N/A
ko04110	103	1	0	100	100	0	0	80.1	80.9	0	0
ko04111	118	0	0	100	#N/A	0	#N/A	100	#N/A	0	#N/A
ko04112	31	29	5	67.7	68.6	0	0	52.3	52.9	0	0
ko04113	99	5	1	65.5	66.4	0	0	76.3	72.1	0	0
ko04114	74	1	0	100	100	0	0	82.3	79.9	0	0
ko04115	58	2	0	100	100	0	0	64	65.2	0	0
ko04120	119	0	0	100	#N/A	0	#N/A	100	#N/A	0	#N/A
ko04121	544	3	0	100	100	0	0	54	53.2	0	0
ko04122	21	17	6	9.7	10.7	0	0	97.8	96.3	0	0
ko04130	34	0	0	100	#N/A	0	#N/A	100	#N/A	0	#N/A
ko04131	42	0	0	100	#N/A	0	#N/A	100	#N/A	0	#N/A
ko04140	21	0	0	100	#N/A	0	#N/A	100	#N/A	0	#N/A
ko04141	137	7	1	78.1	78.8	0	0	58.4	59.1	0	0
ko04142	99	18	3	69.3	72.7	0	0	51.8	50.5	0	0
ko04144	138	1	0	100	100	0	0	79	81.8	0	0
ko04145	93	2	0	100	100	0	0	63.8	62.4	0	0
ko04146	70	19	3	72.4	75.8	0	0	49.9	47.3	0	0
ko04150	30	1	0	100	100	0	0	79.9	82	0	0
ko04210	62	2	0	100	100	0	0	66.3	65.4	0	0
ko04260	58	4	0	100	100	0	0	45.7	41.5	0	0
ko04270	82	1	0	100	100	0	0	82.3	79.3	0	0
ko04310	97	1	0	100	100	0	0	81.8	82.9	0	0
ko04320	24	0	0	100	#N/A	0	#N/A	100	#N/A	0	#N/A
ko04330	28	1	0	100	100	0	0	81.8	79.6	0	0
ko04340	39	0	0	100	#N/A	0	#N/A	100	#N/A	0	#N/A
ko04350	50	0	0	100	#N/A	0	#N/A	100	#N/A	0	#N/A
ko04360	80	0	0	100	#N/A	0	#N/A	100	#N/A	0	#N/A
ko04370	33	2	0	100	100	0	0	63	65.6	0	0
ko04380	94	0	0	100	#N/A	0	#N/A	100	#N/A	0	#N/A
ko04510	133	4	0	100	100	0	0	41.9	43.9	0	0
ko04512	56	2	0	100	100	0	0	64.2	66.2	0	0
ko04514	89	0	0	100	#N/A	0	#N/A	100	#N/A	0	#N/A
ko04515	180	0	0	100	#N/A	0	#N/A	100	#N/A	0	#N/A
ko04516	81	2	0	100	100	0	0	64.2	64.3	0	0
ko04520	59	1	0	100	100	0	0	79.5	81.8	0	0
ko04530	69	1	0	100	100	0	0	79.5	78.8	0	0
ko04540	54	0	0	100	#N/A	0	#N/A	100	#N/A	0	#N/A
ko04610	69	1	0	100	100	0	0	83.4	79.9	0	0
ko04612	41	1	0	100	100	0	0	79.1	82.6	0	0
ko04614	17	4	0	100	100	0	0	40.9	39.1	0	0
ko04620	74	0	0	100	#N/A	0	#N/A	100	#N/A	0	#N/A
ko04621	51	5	1	67.7	67.4	0	0	72.7	77.3	0	0
ko04622	53	1	1	18.7	19.6	0	0	100	100	0	0
ko04623	50	0	0	100	#N/A	0	#N/A	100	#N/A	0	#N/A
ko04626	70	12	2	71.9	72	0	0	55.5	60	0	0
ko04630	118	0	0	100	#N/A	0	#N/A	100	#N/A	0	#N/A
ko04640	78	1	0	100	100	0	0	81	78.4	0	0
ko04650	78	0	0	100	#N/A	0	#N/A	100	#N/A	0	#N/A
ko04660	80	0	0	100	#N/A	0	#N/A	100	#N/A	0	#N/A
ko04662	50	0	0	100	#N/A	0	#N/A	100	#N/A	0	#N/A
ko04664	43	0	0	100	#N/A	0	#N/A	100	#N/A	0	#N/A
ko04666	53	2	0	100	100	0	0	61.1	66.3	0	0
ko04670	71	1	0	100	100	0	0	79.5	81.6	0	0
ko04672	37	0	0	100	#N/A	0	#N/A	100	#N/A	0	#N/A
ko04710	18	0	0	100	#N/A	0	#N/A	100	#N/A	0	#N/A
ko04711	8	0	0	100	#N/A	0	#N/A	100	#N/A	0	#N/A
ko04712	24	0	0	100	#N/A	0	#N/A	100	#N/A	0	#N/A
ko04720	41	1	0	100	100	0	0	82.3	81.1	0	0
ko04722	85	0	0	100	#N/A	0	#N/A	100	#N/A	0	#N/A
ko04730	42	0	0	100	#N/A	0	#N/A	100	#N/A	0	#N/A
ko04740	16	0	0	100	#N/A	0	#N/A	100	#N/A	0	#N/A
ko04742	23	0	0	100	#N/A	0	#N/A	100	#N/A	0	#N/A
ko04744	17	0	0	100	#N/A	0	#N/A	100	#N/A	0	#N/A
ko04745	18	1	0	100	100	0	0	79.5	80	0	0
ko04810	144	2	0	100	100	0	0	65.7	62.7	0	0
ko04812	153	7	2	39.2	42.8	0	0	85.9	86.4	0	0
ko04910	77	10	3	29.2	33.4	0	0	89.9	90.2	0	0
ko04912	60	1	0	100	100	0	0	79	81.9	0	0
ko04914	59	1	0	100	100	0	0	79.1	81.1	0	0
ko04916	64	1	0	100	100	0	0	80.7	82.8	0	0
ko04920	45	4	0	100	100	0	0	43.3	41.2	0	0
ko04930	31	2	2	3.9	3.1	1	1	100	100	0	0
ko04940	24	2	1	36.5	36.8	0	0	96.4	97.2	0	0
ko04950	25	0	0	100	#N/A	0	#N/A	100	#N/A	0	#N/A
ko04960	24	1	0	100	100	0	0	81.4	80.3	0	0
ko04961	27	2	0	100	100	0	0	63.3	65.1	0	0
ko04962	33	1	0	100	100	0	0	78.4	79.3	0	0
ko04964	12	4	1	55.5	60.4	0	0	84	82.4	0	0
ko04966	16	0	0	100	#N/A	0	#N/A	100	#N/A	0	#N/A
ko04970	59	1	0	100	100	0	0	81.4	79.3	0	0
ko04971	46	1	0	100	100	0	0	81.4	80.2	0	0
ko04972	64	2	0	100	100	0	0	66.2	66.5	0	0
ko04973	19	5	1	67.9	67.5	0	0	73.9	73.3	0	0
ko04974	49	6	1	73.4	72.3	0	0	64	64.4	0	0
ko04975	26	0	0	100	#N/A	0	#N/A	100	#N/A	0	#N/A
ko04976	58	4	0	100	100	0	0	42.7	42.6	0	0
ko04977	21	0	0	100	#N/A	0	#N/A	100	#N/A	0	#N/A
ko04978	30	3	0	100	100	0	0	50.4	52.8	0	0
ko05010	140	8	0	100	100	0	0	19.1	19.7	0	0
ko05012	113	5	0	100	100	0	0	36.5	34.3	0	0
ko05014	43	3	0	100	100	0	0	52.4	52.4	0	0
ko05016	147	8	0	100	100	0	0	17.6	17.7	0	0
ko05020	29	1	0	100	100	0	0	81.2	80.1	0	0
ko05100	65	17	0	100	100	0	0	2.2	2.5	1	1
ko05110	47	9	0	100	100	0	0	14.1	13.5	0	0
ko05111	42	34	5	81.4	81.2	0	0	35.6	32.6	0	0
ko05120	55	4	3	2.3	1.7	1	1	100	99.9	0	0
ko05130	38	9	0	100	100	0	0	13.5	15.7	0	0
ko05131	61	14	0	100	100	0	0	4.7	4.9	1	1
ko05140	55	1	0	100	100	0	0	81.4	82.1	0	0
ko05142	82	2	1	33.4	34.6	0	0	95.7	96.2	0	0
ko05143	35	4	2	17.9	16.5	0	0	97.1	98.4	0	0
ko05144	63	0	0	100	#N/A	0	#N/A	100	#N/A	0	#N/A
ko05145	93	3	0	100	100	0	0	52.7	50.1	0	0
ko05146	78	5	2	25.7	23.7	0	0	94	92.7	0	0
ko05150	65	19	0	100	100	0	0	2	1.1	1	1
ko05152	139	12	2	73.6	71.4	0	0	54.8	57.3	0	0
ko05160	74	1	0	100	100	0	0	80.7	81	0	0
ko05162	99	1	0	100	100	0	0	80.7	81.4	0	0
ko05200	239	6	0	100	100	0	0	29.1	28.7	0	0
ko05210	49	1	0	100	100	0	0	80.1	80.3	0	0
ko05211	50	1	0	100	100	0	0	81.3	79.6	0	0
ko05212	53	0	0	100	#N/A	0	#N/A	100	#N/A	0	#N/A
ko05213	39	0	0	100	#N/A	0	#N/A	100	#N/A	0	#N/A
ko05214	39	0	0	100	#N/A	0	#N/A	100	#N/A	0	#N/A
ko05215	68	2	0	100	100	0	0	63.9	64.9	0	0
ko05216	28	0	0	100	#N/A	0	#N/A	100	#N/A	0	#N/A
ko05217	40	0	0	100	#N/A	0	#N/A	100	#N/A	0	#N/A
ko05218	38	0	0	100	#N/A	0	#N/A	100	#N/A	0	#N/A
ko05219	33	1	1	17.8	19.5	0	0	100	100	0	0
ko05220	53	1	0	100	100	0	0	81.8	80.6	0	0
ko05221	45	0	0	100	#N/A	0	#N/A	100	#N/A	0	#N/A
ko05222	63	3	0	100	100	0	0	52.7	55.4	0	0
ko05223	40	0	0	100	#N/A	0	#N/A	100	#N/A	0	#N/A
ko05310	19	0	0	100	#N/A	0	#N/A	100	#N/A	0	#N/A
ko05320	25	0	0	100	#N/A	0	#N/A	100	#N/A	0	#N/A
ko05322	46	1	0	100	100	0	0	80.2	80.5	0	0
ko05323	65	0	0	100	#N/A	0	#N/A	100	#N/A	0	#N/A
ko05330	22	0	0	100	#N/A	0	#N/A	100	#N/A	0	#N/A
ko05332	18	0	0	100	#N/A	0	#N/A	100	#N/A	0	#N/A
ko05340	34	2	2	4.2	4.4	1	1	100	100	0	0
ko05410	75	2	0	100	100	0	0	64.8	65.4	0	0
ko05412	65	1	0	100	100	0	0	79.5	79.1	0	0
ko05414	82	1	0	100	100	0	0	79.5	80.8	0	0
ko05416	38	2	0	100	100	0	0	63	65.9	0	0

## Sheet: Simulation Results main only
Supplementary Table 6
Sidak adjusted for maintaining 5% error				#Over represented
0.000183174	0.000183174		Total	10
				%Simulations >= #L4 Sig
L3	Number in Pathway	L4 Found in Pathway	Sig L4 in Pathway	Permute Signficant L4					KEGG L1	KEGG L2	KEGG L3 (Pathway)
ko00250	55	43	25	0	1	#REF!	#REF!		Metabolism	Amino Acid Metabolism	Alanine, aspartate and glutamate metabolism
ko00270	66	59	30	0	1	#REF!	#REF!		Metabolism	Amino Acid Metabolism	Cysteine and methionine metabolism
ko00300	40	36	20	0	1	#REF!	#REF!		Metabolism	Amino Acid Metabolism	Lysine biosynthesis
ko00330	128	109	47	0	1	#REF!	#REF!		Metabolism	Amino Acid Metabolism	Arginine and proline metabolism
ko00400	62	55	28	0	1	#REF!	#REF!		Metabolism	Amino Acid Metabolism	Phenylalanine, tyrosine and tryptophan biosynthesis
ko00620	73	67	31	0	1	#REF!	#REF!		Metabolism	Carbohydrate Metabolism	Pyruvate metabolism
ko00900	35	28	16	0	1	#REF!	#REF!		Metabolism	Metabolism of Terpenoids and Polyketides	Terpenoid backbone biosynthesis
ko01007	104	84	38	0	1	#REF!	#REF!		Metabolism	Amino Acid Metabolism	Amino acid related enzymes
ko02040	41	40	26	0	1	#REF!	#REF!		Cellular Processes	Cell Motility	Flagellar assembly
ko03009	327	76	39	0	1	#REF!	#REF!		Genetic Information Processing	Translation	Ribosome Biogenesis
ko00550	37	40	20	0.1	1	#REF!	#REF!		Metabolism	Glycan Biosynthesis and Metabolism	Peptidoglycan biosynthesis
ko00760	35	28	16	0.1	1	#REF!	#REF!		Metabolism	Metabolism of Cofactors and Vitamins	Nicotinate and nicotinamide metabolism
ko03030	51	24	14	0.1	1	#REF!	#REF!		Genetic Information Processing	Replication and Repair	DNA replication
ko04122	21	17	12	0.1	1	#REF!	#REF!		Genetic Information Processing	Folding, Sorting and Degradation	Sulfur relay system
ko00540	30	30	16	0.2	1	#REF!	#REF!		Metabolism	Glycan Biosynthesis and Metabolism	Lipopolysaccharide biosynthesis
ko00030	44	46	22	0.4	1	#REF!	#REF!		Metabolism	Carbohydrate Metabolism	Pentose phosphate pathway
ko00710	36	31	17	0.4	1	#REF!	#REF!		Metabolism	Energy Metabolism	Carbon fixation in photosynthetic organisms
ko00730	22	18	11	0.4	1	#REF!	#REF!		Metabolism	Metabolism of Cofactors and Vitamins	Thiamine metabolism
ko00340	39	32	17	0.5	1	#REF!	#REF!		Metabolism	Amino Acid Metabolism	Histidine metabolism
ko00450	28	25	14	0.5	1	#REF!	#REF!		Metabolism	Metabolism of Other Amino Acids	Selenocompound metabolism
ko00770	32	30	16	0.5	1	#REF!	#REF!		Metabolism	Metabolism of Cofactors and Vitamins	Pantothenate and CoA biosynthesis
ko00970	64	41	20	0.5	1	#REF!	#REF!		Genetic Information Processing	Translation	Aminoacyl-tRNA biosynthesis
ko03400	300	127	51	0.5	1	#REF!	#REF!		Genetic Information Processing	Replication and Repair	DNA repair and recombination proteins
ko00240	153	100	40	0.7	1	#REF!	#REF!		Metabolism	Nucleotide Metabolism	Pyrimidine metabolism
ko00660	12	12	8	0.7	1	#REF!	#REF!		Metabolism	Carbohydrate Metabolism	C5-Branched dibasic acid metabolism
ko00720	67	72	32	0.7	1	#REF!	#REF!		Metabolism	Energy Metabolism	Carbon fixation pathways in prokaryotes
ko03060	39	22	13	0.7	1	#REF!	#REF!		Genetic Information Processing	Folding, Sorting and Degradation	Protein export
ko00640	66	56	25	0.9	1	#REF!	#REF!		Metabolism	Carbohydrate Metabolism	Propanoate metabolism
ko03018	75	21	12	0.9	1	#REF!	#REF!		Genetic Information Processing	Folding, Sorting and Degradation	RNA degradation
ko05120	55	4	4	1	1	#REF!	#REF!		Human Diseases	Infectious Diseases	Epithelial cell signaling in Helicobacter pylori infection
ko00790	28	26	14	1.1	1	#REF!	#REF!		Metabolism	Metabolism of Cofactors and Vitamins	Folate biosynthesis
ko00650	69	74	31	1.3	1	#REF!	#REF!		Metabolism	Carbohydrate Metabolism	Butanoate metabolism
ko03440	59	30	15	1.5	1	#REF!	#REF!		Genetic Information Processing	Replication and Repair	Homologous recombination
ko00920	32	28	14	1.6	1	#REF!	#REF!		Metabolism	Energy Metabolism	Sulfur metabolism
ko00750	15	11	7	2	1	#REF!	#REF!		Metabolism	Metabolism of Cofactors and Vitamins	Vitamin B6 metabolism
ko02030	26	26	13	2	1	#REF!	#REF!		Cellular Processes	Cell Motility	Bacterial chemotaxis
ko00670	27	21	11	2.2	1	#REF!	#REF!		Metabolism	Metabolism of Cofactors and Vitamins	One carbon pool by folate
ko00780	10	9	6	2.3	1	#REF!	#REF!		Metabolism	Metabolism of Cofactors and Vitamins	Biotin metabolism
ko03430	45	28	14	2.5	1	#REF!	#REF!		Genetic Information Processing	Replication and Repair	Mismatch repair
ko00603	14	3	3	3	1	#REF!	#REF!		Metabolism	Glycan Biosynthesis and Metabolism	Glycosphingolipid biosynthesis - globo series
ko00785	4	3	3	3	1	#REF!	#REF!		Metabolism	Metabolism of Cofactors and Vitamins	Lipoic acid metabolism
ko00440	27	9	6	3.2	1	#REF!	#REF!		Metabolism	Metabolism of Other Amino Acids	Phosphonate and phosphinate metabolism
ko03070	74	75	30	3.4	1	#REF!	#REF!		Environmental Information Processing	Membrane Transport	Bacterial secretion system
ko00260	67	69	27	3.5	1	#REF!	#REF!		Metabolism	Amino Acid Metabolism	Glycine, serine and threonine metabolism
ko00020	53	47	20	3.6	1	#REF!	#REF!		Metabolism	Carbohydrate Metabolism	Citrate cycle (TCA cycle)
ko03032	164	59	24	3.9	1	#REF!	#REF!		Genetic Information Processing	Replication and Repair	DNA replication proteins
ko00290	22	21	10	5.2	0	#REF!	#REF!		Metabolism	Amino Acid Metabolism	Valine, leucine and isoleucine biosynthesis
ko03036	535	71	27	6	0	#REF!	#REF!		Genetic Information Processing	Replication and Repair	Chromosome
ko00523	32	6	4	6.1	0	#REF!	#REF!		Metabolism	Metabolism of Terpenoids and Polyketides	Polyketide sugar unit biosynthesis
ko00564	83	38	16	6.1	0	#REF!	#REF!		Metabolism	Lipid Metabolism	Glycerophospholipid metabolism
ko00480	38	24	11	6.7	0	#REF!	#REF!		Metabolism	Metabolism of Other Amino Acids	Glutathione metabolism
ko00511	16	11	6	7.1	0	#REF!	#REF!		Metabolism	Glycan Biosynthesis and Metabolism	Other glycan degradation
ko02035	137	136	48	7.1	0	#REF!	#REF!		Cellular Processes	Cell Motility	Bacterial motility proteins
ko00983	22	16	8	7.5	0	#REF!	#REF!		Metabolism	Xenobiotics Biodegradation and Metabolism	Drug metabolism - other enzymes
ko04930	31	2	2	7.6	0	#REF!	#REF!		Human Diseases	Metabolic Diseases	Type II diabetes mellitus
ko00010	80	68	26	8.1	0	#REF!	#REF!		Metabolism	Carbohydrate Metabolism	Glycolysis / Gluconeogenesis
ko04040	350	2	2	8.2	0	#REF!	#REF!		Environmental Information Processing	Signaling Molecules and Interaction	Ion channels
ko00521	17	14	7	8.4	0	#REF!	#REF!		Metabolism	Biosynthesis of Other Secondary Metabolites	Streptomycin biosynthesis
ko00061	26	22	10	9.3	0	#REF!	#REF!		Metabolism	Lipid Metabolism	Fatty acid biosynthesis
ko03410	41	23	10	10.6	0	#REF!	#REF!		Genetic Information Processing	Replication and Repair	Base excision repair
ko00561	65	35	14	11.6	0	#REF!	#REF!		Metabolism	Lipid Metabolism	Glycerolipid metabolism
ko00471	6	7	4	11.7	0	#REF!	#REF!		Metabolism	Metabolism of Other Amino Acids	D-Glutamine and D-glutamate metabolism
ko04910	77	10	5	13.7	0	#REF!	#REF!		Organismal Systems	Endocrine System	Insulin signaling pathway
ko00311	14	8	4	17.4	0	#REF!	#REF!		Metabolism	Biosynthesis of Other Secondary Metabolites	Penicillin and cephalosporin biosynthesis
ko00040	52	50	18	17.9	0	#REF!	#REF!		Metabolism	Carbohydrate Metabolism	Pentose and glucuronate interconversions
ko00230	241	153	50	18.7	0	#REF!	#REF!		Metabolism	Nucleotide Metabolism	Purine metabolism
ko00791	14	11	5	19.5	0	#REF!	#REF!		Metabolism	Xenobiotics Biodegradation and Metabolism	Atrazine degradation
ko01006	45	20	8	21.8	0	#REF!	#REF!		Metabolism	Metabolism of Terpenoids and Polyketides	Prenyltransferases
ko00860	103	87	29	22.9	0	#REF!	#REF!		Metabolism	Metabolism of Cofactors and Vitamins	Porphyrin and chlorophyll metabolism
ko00401	40	9	4	23.8	0	#REF!	#REF!		Metabolism	Biosynthesis of Other Secondary Metabolites	Novobiocin biosynthesis
ko03051	73	6	3	24.2	0	#REF!	#REF!		Genetic Information Processing	Folding, Sorting and Degradation	Proteasome
ko00500	80	68	23	24.4	0	#REF!	#REF!		Metabolism	Carbohydrate Metabolism	Starch and sucrose metabolism
ko00430	16	12	5	25.7	0	#REF!	#REF!		Metabolism	Metabolism of Other Amino Acids	Taurine and hypotaurine metabolism
ko00908	8	1	1	26	0	#REF!	#REF!		Metabolism	Metabolism of Terpenoids and Polyketides	Zeatin biosynthesis
ko03010	144	91	30	26.7	0	#REF!	#REF!		Genetic Information Processing	Translation	Ribosome
ko03011	145	91	30	26.7	0	#REF!	#REF!		Genetic Information Processing	Translation	Ribosome
ko02010	327	304	94	26.8	0	#REF!	#REF!		Environmental Information Processing	Membrane Transport	ABC transporters
ko05219	33	1	1	27.3	0	#REF!	#REF!		Human Diseases	Cancers	Bladder cancer
ko05211	50	1	1	27.5	0	#REF!	#REF!		Human Diseases	Cancers	Renal cell carcinoma
ko00604	14	1	1	27.6	0	#REF!	#REF!		Metabolism	Glycan Biosynthesis and Metabolism	Glycosphingolipid biosynthesis - ganglio series
ko04622	53	1	1	27.7	0	#REF!	#REF!		Organismal Systems	Immune System	RIG-I-like receptor signaling pathway
ko00944	12	1	1	27.8	0	#REF!	#REF!		Metabolism	Biosynthesis of Other Secondary Metabolites	Flavone and flavonol biosynthesis
ko01055	1	1	1	27.9	0	#REF!	#REF!		Metabolism	Metabolism of Terpenoids and Polyketides	Biosynthesis of vancomycin group antibiotics
ko00643	18	12	5	28.2	0	#REF!	#REF!		Metabolism	Xenobiotics Biodegradation and Metabolism	Styrene degradation
ko05322	46	1	1	28.5	0	#REF!	#REF!		Human Diseases	Immune System Diseases	Systemic lupus erythematosus
ko00740	31	22	8	29.6	0	#REF!	#REF!		Metabolism	Metabolism of Cofactors and Vitamins	Riboflavin metabolism
ko01002	623	182	57	30.2	0	#REF!	#REF!		Metabolism	Enzyme Families	Peptidases
ko04011	39	1	1	30.8	0	#REF!	#REF!		Environmental Information Processing	Signal Transduction	MAPK signaling pathway - yeast
ko00633	22	22	8	31	0	#REF!	#REF!		Metabolism	Xenobiotics Biodegradation and Metabolism	Nitrotoluene degradation
ko05146	78	4	2	31	0	#REF!	#REF!		Human Diseases	Infectious Diseases	Amoebiasis
ko00630	66	61	20	31.3	0	#REF!	#REF!		Metabolism	Carbohydrate Metabolism	Glyoxylate and dicarboxylate metabolism
ko03040	120	1	1	31.3	0	#REF!	#REF!		Genetic Information Processing	Transcription	Spliceosome
ko00830	35	4	2	31.6	0	#REF!	#REF!		Metabolism	Metabolism of Cofactors and Vitamins	Retinol metabolism
ko05143	35	4	2	31.7	0	#REF!	#REF!		Human Diseases	Infectious Diseases	African trypanosomiasis
ko00280	57	41	14	31.8	0	#REF!	#REF!		Metabolism	Amino Acid Metabolism	Valine, leucine and isoleucine degradation
ko04070	38	4	2	31.8	0	#REF!	#REF!		Environmental Information Processing	Signal Transduction	Phosphatidylinositol signaling system
ko04964	12	4	2	31.9	0	#REF!	#REF!		Organismal Systems	Excretory System	Proximal tubule bicarbonate reclamation
ko00460	28	13	5	32.3	0	#REF!	#REF!		Metabolism	Metabolism of Other Amino Acids	Cyanoamino acid metabolism
ko00520	107	101	32	33	0	#REF!	#REF!		Metabolism	Carbohydrate Metabolism	Amino sugar and nucleotide sugar metabolism
ko03050	48	4	2	33.1	0	#REF!	#REF!		Genetic Information Processing	Folding, Sorting and Degradation	Proteasome
ko00600	40	13	5	33.4	0	#REF!	#REF!		Metabolism	Lipid Metabolism	Sphingolipid metabolism
ko00910	99	95	30	33.7	0	#REF!	#REF!		Metabolism	Energy Metabolism	Nitrogen metabolism
ko04141	137	7	3	33.7	0	#REF!	#REF!		Genetic Information Processing	Folding, Sorting and Degradation	Protein processing in endoplasmic reticulum
ko00626	28	23	8	33.8	0	#REF!	#REF!		Metabolism	Xenobiotics Biodegradation and Metabolism	Naphthalene degradation
ko00051	67	76	24	34.1	0	#REF!	#REF!		Metabolism	Carbohydrate Metabolism	Fructose and mannose metabolism
ko00253	18	7	3	34.4	0	#REF!	#REF!		Metabolism	Metabolism of Terpenoids and Polyketides	Tetracycline biosynthesis
ko04920	45	4	2	34.7	0	#REF!	#REF!		Organismal Systems	Endocrine System	Adipocytokine signaling pathway
ko00363	12	14	5	38.4	0	#REF!	#REF!		Metabolism	Xenobiotics Biodegradation and Metabolism	Bisphenol degradation
ko03420	48	14	5	38.5	0	#REF!	#REF!		Genetic Information Processing	Replication and Repair	Nucleotide excision repair
ko00410	34	24	8	40.3	0	#REF!	#REF!		Metabolism	Metabolism of Other Amino Acids	beta-Alanine metabolism
ko00072	8	8	3	41.5	0	#REF!	#REF!		Metabolism	Lipid Metabolism	Synthesis and degradation of ketone bodies
ko00590	29	5	2	44.6	0	#REF!	#REF!		Metabolism	Lipid Metabolism	Arachidonic acid metabolism
ko00513	49	2	1	49.1	0	#REF!	#REF!		Metabolism	Glycan Biosynthesis and Metabolism	Various types of N-glycan biosynthesis
ko00950	37	9	3	49.2	0	#REF!	#REF!		Metabolism	Biosynthesis of Other Secondary Metabolites	Isoquinoline alkaloid biosynthesis
ko03015	53	2	1	49.5	0	#REF!	#REF!		Genetic Information Processing	Translation	mRNA surveillance pathway
ko01051	2	2	1	49.8	0	#REF!	#REF!		Metabolism	Metabolism of Terpenoids and Polyketides	Biosynthesis of ansamycins
ko04146	70	19	6	50.1	0	#REF!	#REF!		Cellular Processes	Transport and Catabolism	Peroxisome
ko05142	82	2	1	50.7	0	#REF!	#REF!		Human Diseases	Infectious Diseases	Chagas disease (American trypanosomiasis)
ko05340	34	2	1	50.7	0	#REF!	#REF!		Human Diseases	Immune System Diseases	Primary immunodeficiency
ko00524	22	2	1	50.8	0	#REF!	#REF!		Metabolism	Biosynthesis of Other Secondary Metabolites	Butirosin and neomycin biosynthesis
ko00350	61	40	12	51.2	0	#REF!	#REF!		Metabolism	Amino Acid Metabolism	Tyrosine metabolism
ko04020	133	2	1	52.2	0	#REF!	#REF!		Environmental Information Processing	Signal Transduction	Calcium signaling pathway
ko03320	55	9	3	52.4	0	#REF!	#REF!		Organismal Systems	Endocrine System	PPAR signaling pathway
ko01005	94	89	26	53.4	0	#REF!	#REF!		Metabolism	Glycan Biosynthesis and Metabolism	Lipopolysaccharide biosynthesis proteins
ko03020	60	30	9	53.6	0	#REF!	#REF!		Genetic Information Processing	Transcription	RNA polymerase
ko00960	23	13	4	54.8	0	#REF!	#REF!		Metabolism	Biosynthesis of Other Secondary Metabolites	Tropane, piperidine and pyridine alkaloid biosynthesis
ko00473	5	6	2	55.6	0	#REF!	#REF!		Metabolism	Metabolism of Other Amino Acids	D-Alanine metabolism
ko00071	47	31	9	56.8	0	#REF!	#REF!		Metabolism	Lipid Metabolism	Fatty acid metabolism
ko00380	62	31	9	57	0	#REF!	#REF!		Metabolism	Amino Acid Metabolism	Tryptophan metabolism
ko00310	54	24	7	58.2	0	#REF!	#REF!		Metabolism	Amino Acid Metabolism	Lysine degradation
ko02000	606	527	151	61.2	0	#REF!	#REF!		Environmental Information Processing	Membrane Transport	Transporters
ko04978	30	3	1	62.7	0	#REF!	#REF!		Organismal Systems	Digestive System	Mineral absorption
ko00903	21	18	5	62.8	0	#REF!	#REF!		Metabolism	Metabolism of Terpenoids and Polyketides	Limonene and pinene degradation
ko05014	43	3	1	64	0	#REF!	#REF!		Human Diseases	Neurodegenerative Diseases	Amyotrophic lateral sclerosis (ALS)
ko03041	294	3	1	65.3	0	#REF!	#REF!		Genetic Information Processing	Transcription	Spliceosome
ko04142	99	18	5	65.3	0	#REF!	#REF!		Cellular Processes	Transport and Catabolism	Lysosome
ko00510	44	7	2	65.4	0	#REF!	#REF!		Metabolism	Glycan Biosynthesis and Metabolism	N-Glycan biosynthesis
ko00625	26	22	6	65.5	0	#REF!	#REF!		Metabolism	Xenobiotics Biodegradation and Metabolism	Chloroalkane and chloroalkene degradation
ko04121	544	3	1	65.6	0	#REF!	#REF!		Genetic Information Processing	Folding, Sorting and Degradation	Ubiquitin system
ko04812	153	7	2	66.2	0	#REF!	#REF!		Cellular Processes	Cell Motility	Cytoskeleton proteins
ko05152	139	11	3	66.2	0	#REF!	#REF!		Human Diseases	Infectious Diseases	Tuberculosis
ko00562	45	18	5	66.8	0	#REF!	#REF!		Metabolism	Carbohydrate Metabolism	Inositol phosphate metabolism
ko04090	349	7	2	67.5	0	#REF!	#REF!		Environmental Information Processing	Signaling Molecules and Interaction	Cellular antigens
ko00592	16	3	1	68	0	#REF!	#REF!		Metabolism	Lipid Metabolism	alpha-Linolenic acid metabolism
ko00190	206	106	29	68.3	0	#REF!	#REF!		Metabolism	Energy Metabolism	Oxidative phosphorylation
ko00940	25	8	2	70.2	0	#REF!	#REF!		Metabolism	Biosynthesis of Other Secondary Metabolites	Phenylpropanoid biosynthesis
ko00052	57	45	12	70.6	0	#REF!	#REF!		Metabolism	Carbohydrate Metabolism	Galactose metabolism
ko00140	35	8	2	72.4	0	#REF!	#REF!		Metabolism	Lipid Metabolism	Steroid hormone biosynthesis
ko04113	99	4	1	74.6	0	#REF!	#REF!		Cellular Processes	Cell Growth and Death	Meiosis - yeast
ko04973	19	4	1	75.3	0	#REF!	#REF!		Organismal Systems	Digestive System	Carbohydrate digestion and absorption
ko00351	7	4	1	75.9	0	#REF!	#REF!		Metabolism	Xenobiotics Biodegradation and Metabolism	1,1,1-Trichloro-2,2-bis(4-chlorophenyl)ethane (DDT) degradation
ko03000	809	216	59	76.2	0	#REF!	#REF!		Genetic Information Processing	Transcription	Transcription factors
ko04112	31	29	7	78.8	0	#REF!	#REF!		Cellular Processes	Cell Growth and Death	Cell cycle - Caulobacter
ko03012	50	26	6	80.9	0	#REF!	#REF!		Genetic Information Processing	Translation	Translation factors
ko00531	14	10	2	84.4	0	#REF!	#REF!		Metabolism	Glycan Biosynthesis and Metabolism	Glycosaminoglycan degradation
ko00680	192	184	48	84.9	0	#REF!	#REF!		Metabolism	Energy Metabolism	Methane metabolism
ko00980	22	6	1	85.7	0	#REF!	#REF!		Metabolism	Xenobiotics Biodegradation and Metabolism	Metabolism of xenobiotics by cytochrome P450
ko01040	29	15	3	86	0	#REF!	#REF!		Metabolism	Lipid Metabolism	Biosynthesis of unsaturated fatty acids
ko04974	49	6	1	86.1	0	#REF!	#REF!		Organismal Systems	Digestive System	Protein digestion and absorption
ko05200	239	6	1	86.8	0	#REF!	#REF!		Human Diseases	Cancers	Pathways in cancer
ko00591	13	6	1	87.5	0	#REF!	#REF!		Metabolism	Lipid Metabolism	Linoleic acid metabolism
ko00312	7	6	1	87.6	0	#REF!	#REF!		Metabolism	Biosynthesis of Other Secondary Metabolites	beta-Lactam resistance
ko03110	227	72	17	88.2	0	#REF!	#REF!		Genetic Information Processing	Folding, Sorting and Degradation	Chaperones and folding catalysts
ko00621	13	13	2	90.3	0	#REF!	#REF!		Metabolism	Xenobiotics Biodegradation and Metabolism	Dioxin degradation
ko00982	20	7	1	90.5	0	#REF!	#REF!		Metabolism	Xenobiotics Biodegradation and Metabolism	Drug metabolism - cytochrome P450
ko00281	16	17	3	91.1	0	#REF!	#REF!		Metabolism	Metabolism of Terpenoids and Polyketides	Geraniol degradation
ko00053	35	26	5	91.6	0	#REF!	#REF!		Metabolism	Carbohydrate Metabolism	Ascorbate and aldarate metabolism
ko00627	59	49	10	93.7	0	#REF!	#REF!		Metabolism	Xenobiotics Biodegradation and Metabolism	Aminobenzoate degradation
ko02060	75	84	19	94.2	0	#REF!	#REF!		Environmental Information Processing	Membrane Transport	Phosphotransferase system (PTS)
ko05016	147	8	1	94.3	0	#REF!	#REF!		Human Diseases	Neurodegenerative Diseases	Huntington's disease
ko03008	82	15	2	95.7	0	#REF!	#REF!		Genetic Information Processing	Translation	Ribosome biogenesis in eukaryotes
ko00623	28	31	5	96.4	0	#REF!	#REF!		Metabolism	Xenobiotics Biodegradation and Metabolism	Toluene degradation
ko00624	34	26	4	96.5	0	#REF!	#REF!		Metabolism	Xenobiotics Biodegradation and Metabolism	Polycyclic aromatic hydrocarbon degradation
ko00361	19	20	3	96.8	0	#REF!	#REF!		Metabolism	Xenobiotics Biodegradation and Metabolism	Chlorocyclohexane and chlorobenzene degradation
ko03013	132	16	2	97	0	#REF!	#REF!		Genetic Information Processing	Translation	RNA transport
ko01001	477	102	22	97.1	0	#REF!	#REF!		Metabolism	Enzyme Families	Protein kinases
ko04626	70	12	1	97.6	0	#REF!	#REF!		Organismal Systems	Environmental Adaptation	Plant-pathogen interaction
ko00930	14	11	1	98.2	0	#REF!	#REF!		Metabolism	Xenobiotics Biodegradation and Metabolism	Caprolactam degradation
ko05111	42	34	5	98.4	0	#REF!	#REF!		Human Diseases	Infectious Diseases	Vibrio cholerae pathogenic cycle
ko00360	51	35	5	98.7	0	#REF!	#REF!		Metabolism	Amino Acid Metabolism	Phenylalanine metabolism
ko00130	41	29	4	98.8	0	#REF!	#REF!		Metabolism	Metabolism of Cofactors and Vitamins	Ubiquinone and other terpenoid-quinone biosynthesis
ko00364	15	13	1	99.4	0	#REF!	#REF!		Metabolism	Xenobiotics Biodegradation and Metabolism	Fluorobenzoate degradation
ko00362	76	68	11	99.6	0	#REF!	#REF!		Metabolism	Xenobiotics Biodegradation and Metabolism	Benzoate degradation
ko00622	20	17	1	99.6	0	#REF!	#REF!		Metabolism	Xenobiotics Biodegradation and Metabolism	Xylene degradation
ko02020	322	315	70	99.8	0	#REF!	#REF!		Environmental Information Processing	Signal Transduction	Two-component system
ko00195	63	49	7	99.9	0	#REF!	#REF!		Metabolism	Energy Metabolism	Photosynthesis
ko00062	7	1	0	100	0	#REF!	#REF!		Metabolism	Lipid Metabolism	Fatty acid elongation in mitochondria
ko00100	32	10	0	100	0	#REF!	#REF!		Metabolism	Lipid Metabolism	Steroid biosynthesis
ko00120	17	2	0	100	0	#REF!	#REF!		Metabolism	Lipid Metabolism	Primary bile acid biosynthesis
ko00121	1	1	0	100	0	#REF!	#REF!		Metabolism	Lipid Metabolism	Secondary bile acid biosynthesis
ko00194	137	105	9	100	0	#REF!	#REF!		Metabolism	Energy Metabolism	Photosynthesis proteins
ko00196	41	26	1	100	0	#REF!	#REF!		Metabolism	Energy Metabolism	Photosynthesis - antenna proteins
ko00199	98	2	0	100	0	#REF!	#REF!		Metabolism	Enzyme Families	Cytochrome P450
ko00232	8	3	0	100	0	#REF!	#REF!		Metabolism	Biosynthesis of Other Secondary Metabolites	Caffeine metabolism
ko00331	5	2	0	100	0	#REF!	#REF!		Metabolism	Biosynthesis of Other Secondary Metabolites	Clavulanic acid biosynthesis
ko00472	2	2	0	100	0	#REF!	#REF!		Metabolism	Metabolism of Other Amino Acids	D-Arginine and D-ornithine metabolism
ko00522	11	7	0	100	0	#REF!	#REF!		Metabolism	Metabolism of Terpenoids and Polyketides	Biosynthesis of 12-, 14- and 16-membered macrolides
ko00532	21	1	0	100	0	#REF!	#REF!		Metabolism	Glycan Biosynthesis and Metabolism	Glycosaminoglycan biosynthesis - chondroitin sulfate
ko00563	26	2	0	100	0	#REF!	#REF!		Metabolism	Glycan Biosynthesis and Metabolism	Glycosylphosphatidylinositol(GPI)-anchor biosynthesis
ko00565	17	5	0	100	0	#REF!	#REF!		Metabolism	Lipid Metabolism	Ether lipid metabolism
ko00601	25	1	0	100	0	#REF!	#REF!		Metabolism	Glycan Biosynthesis and Metabolism	Glycosphingolipid biosynthesis - lacto and neolacto series
ko00642	16	12	0	100	0	#REF!	#REF!		Metabolism	Xenobiotics Biodegradation and Metabolism	Ethylbenzene degradation
ko00901	10	2	0	100	0	#REF!	#REF!		Metabolism	Biosynthesis of Other Secondary Metabolites	Indole alkaloid biosynthesis
ko00902	8	1	0	100	0	#REF!	#REF!		Metabolism	Metabolism of Terpenoids and Polyketides	Monoterpenoid biosynthesis
ko00906	35	23	0	100	0	#REF!	#REF!		Metabolism	Metabolism of Terpenoids and Polyketides	Carotenoid biosynthesis
ko00909	19	3	0	100	0	#REF!	#REF!		Metabolism	Metabolism of Terpenoids and Polyketides	Sesquiterpenoid biosynthesis
ko00941	20	2	0	100	0	#REF!	#REF!		Metabolism	Biosynthesis of Other Secondary Metabolites	Flavonoid biosynthesis
ko00943	13	1	0	100	0	#REF!	#REF!		Metabolism	Biosynthesis of Other Secondary Metabolites	Isoflavonoid biosynthesis
ko00945	10	2	0	100	0	#REF!	#REF!		Metabolism	Biosynthesis of Other Secondary Metabolites	Stilbenoid, diarylheptanoid and gingerol biosynthesis
ko00965	3	3	0	100	0	#REF!	#REF!		Metabolism	Biosynthesis of Other Secondary Metabolites	Betalain biosynthesis
ko01003	316	108	17	100	0	#REF!	#REF!		Metabolism	Glycan Biosynthesis and Metabolism	Glycosyltransferases
ko01004	130	83	13	100	0	#REF!	#REF!		Metabolism	Lipid Metabolism	Lipid biosynthesis proteins
ko01053	32	27	1	100	0	#REF!	#REF!		Metabolism	Metabolism of Terpenoids and Polyketides	Biosynthesis of siderophore group nonribosomal peptides
ko01056	10	5	0	100	0	#REF!	#REF!		Metabolism	Metabolism of Terpenoids and Polyketides	Biosynthesis of type II polyketide backbone
ko01057	18	8	0	100	0	#REF!	#REF!		Metabolism	Metabolism of Terpenoids and Polyketides	Biosynthesis of type II polyketide products
ko02022	196	188	34	100	0	#REF!	#REF!		Environmental Information Processing	Signal Transduction	Two-component system
ko02042	72	54	3	100	0	#REF!	#REF!		Environmental Information Processing	Signaling Molecules and Interaction	Bacterial toxins
ko02044	396	337	63	100	0	#REF!	#REF!		Environmental Information Processing	Membrane Transport	Secretion system
ko03022	35	5	0	100	0	#REF!	#REF!		Genetic Information Processing	Transcription	Basal transcription factors
ko03450	19	3	0	100	0	#REF!	#REF!		Genetic Information Processing	Replication and Repair	Non-homologous end-joining
ko04030	374	3	0	100	0	#REF!	#REF!		Environmental Information Processing	Signaling Molecules and Interaction	G protein-coupled receptors
ko04080	299	1	0	100	0	#REF!	#REF!		Environmental Information Processing	Signaling Molecules and Interaction	Neuroactive ligand-receptor interaction
ko04110	103	1	0	100	0	#REF!	#REF!		Cellular Processes	Cell Growth and Death	Cell cycle
ko04114	74	1	0	100	0	#REF!	#REF!		Cellular Processes	Cell Growth and Death	Oocyte meiosis
ko04115	58	2	0	100	0	#REF!	#REF!		Cellular Processes	Cell Growth and Death	p53 signaling pathway
ko04144	138	1	0	100	0	#REF!	#REF!		Cellular Processes	Transport and Catabolism	Endocytosis
ko04145	93	2	0	100	0	#REF!	#REF!		Cellular Processes	Transport and Catabolism	Phagosome
ko04150	30	1	0	100	0	#REF!	#REF!		Environmental Information Processing	Signal Transduction	mTOR signaling pathway
ko04210	62	2	0	100	0	#REF!	#REF!		Cellular Processes	Cell Growth and Death	Apoptosis
ko04260	58	4	0	100	0	#REF!	#REF!		Organismal Systems	Circulatory System	Cardiac muscle contraction
ko04270	82	1	0	100	0	#REF!	#REF!		Organismal Systems	Circulatory System	Vascular smooth muscle contraction
ko04310	97	1	0	100	0	#REF!	#REF!		Environmental Information Processing	Signal Transduction	Wnt signaling pathway
ko04330	28	1	0	100	0	#REF!	#REF!		Environmental Information Processing	Signal Transduction	Notch signaling pathway
ko04370	33	2	0	100	0	#REF!	#REF!		Environmental Information Processing	Signal Transduction	VEGF signaling pathway
ko04510	133	4	0	100	0	#REF!	#REF!		Cellular Processes	Cell Communication	Focal adhesion
ko04512	56	2	0	100	0	#REF!	#REF!		Environmental Information Processing	Signaling Molecules and Interaction	ECM-receptor interaction
ko04516	81	2	0	100	0	#REF!	#REF!		Environmental Information Processing	Signaling Molecules and Interaction	CAM ligands
ko04520	59	1	0	100	0	#REF!	#REF!		Cellular Processes	Cell Communication	Adherens junction
ko04530	69	1	0	100	0	#REF!	#REF!		Cellular Processes	Cell Communication	Tight junction
ko04610	69	1	0	100	0	#REF!	#REF!		Organismal Systems	Immune System	Complement and coagulation cascades
ko04612	41	1	0	100	0	#REF!	#REF!		Organismal Systems	Immune System	Antigen processing and presentation
ko04614	17	4	0	100	0	#REF!	#REF!		Organismal Systems	Endocrine System	Renin-angiotensin system
ko04621	51	5	0	100	0	#REF!	#REF!		Organismal Systems	Immune System	NOD-like receptor signaling pathway
ko04640	78	1	0	100	0	#REF!	#REF!		Organismal Systems	Immune System	Hematopoietic cell lineage
ko04666	53	2	0	100	0	#REF!	#REF!		Organismal Systems	Immune System	Fc gamma R-mediated phagocytosis
ko04670	71	1	0	100	0	#REF!	#REF!		Organismal Systems	Immune System	Leukocyte transendothelial migration
ko04720	41	1	0	100	0	#REF!	#REF!		Organismal Systems	Nervous System	Long-term potentiation
ko04745	18	1	0	100	0	#REF!	#REF!		Organismal Systems	Sensory System	Phototransduction - fly
ko04810	144	2	0	100	0	#REF!	#REF!		Cellular Processes	Cell Motility	Regulation of actin cytoskeleton
ko04912	60	1	0	100	0	#REF!	#REF!		Organismal Systems	Endocrine System	GnRH signaling pathway
ko04914	59	1	0	100	0	#REF!	#REF!		Organismal Systems	Endocrine System	Progesterone-mediated oocyte maturation
ko04916	64	1	0	100	0	#REF!	#REF!		Organismal Systems	Endocrine System	Melanogenesis
ko04940	24	2	0	100	0	#REF!	#REF!		Human Diseases	Metabolic Diseases	Type I diabetes mellitus
ko04960	24	1	0	100	0	#REF!	#REF!		Organismal Systems	Excretory System	Aldosterone-regulated sodium reabsorption
ko04961	27	2	0	100	0	#REF!	#REF!		Organismal Systems	Excretory System	Endocrine and other factor-regulated calcium reabsorption
ko04962	33	1	0	100	0	#REF!	#REF!		Organismal Systems	Excretory System	Vasopressin-regulated water reabsorption
ko04970	59	1	0	100	0	#REF!	#REF!		Organismal Systems	Digestive System	Salivary secretion
ko04971	46	1	0	100	0	#REF!	#REF!		Organismal Systems	Digestive System	Gastric acid secretion
ko04972	64	2	0	100	0	#REF!	#REF!		Organismal Systems	Digestive System	Pancreatic secretion
ko04976	58	3	0	100	0	#REF!	#REF!		Organismal Systems	Digestive System	Bile secretion
ko05010	140	8	0	100	0	#REF!	#REF!		Human Diseases	Neurodegenerative Diseases	Alzheimer's disease
ko05012	113	5	0	100	0	#REF!	#REF!		Human Diseases	Neurodegenerative Diseases	Parkinson's disease
ko05020	29	1	0	100	0	#REF!	#REF!		Human Diseases	Neurodegenerative Diseases	Prion diseases
ko05100	65	17	0	100	0	#REF!	#REF!		Human Diseases	Infectious Diseases	Bacterial invasion of epithelial cells
ko05110	47	9	0	100	0	#REF!	#REF!		Human Diseases	Infectious Diseases	Vibrio cholerae infection
ko05130	38	9	0	100	0	#REF!	#REF!		Human Diseases	Infectious Diseases	Pathogenic Escherichia coli infection
ko05131	61	14	0	100	0	#REF!	#REF!		Human Diseases	Infectious Diseases	Shigellosis
ko05140	55	1	0	100	0	#REF!	#REF!		Human Diseases	Infectious Diseases	Leishmaniasis
ko05145	93	3	0	100	0	#REF!	#REF!		Human Diseases	Infectious Diseases	Toxoplasmosis
ko05150	65	19	0	100	0	#REF!	#REF!		Human Diseases	Infectious Diseases	Staphylococcus aureus infection
ko05160	74	1	0	100	0	#REF!	#REF!		Human Diseases	Infectious Diseases	Hepatitis C
ko05162	99	1	0	100	0	#REF!	#REF!		Human Diseases	Infectious Diseases	Measles
ko05210	49	1	0	100	0	#REF!	#REF!		Human Diseases	Cancers	Colorectal cancer
ko05215	68	2	0	100	0	#REF!	#REF!		Human Diseases	Cancers	Prostate cancer
ko05220	53	1	0	100	0	#REF!	#REF!		Human Diseases	Cancers	Chronic myeloid leukemia
ko05222	63	3	0	100	0	#REF!	#REF!		Human Diseases	Cancers	Small cell lung cancer
ko05410	75	2	0	100	0	#REF!	#REF!		Human Diseases	Cardiovascular Diseases	Hypertrophic cardiomyopathy (HCM)
ko05412	65	1	0	100	0	#REF!	#REF!		Human Diseases	Cardiovascular Diseases	Arrhythmogenic right ventricular cardiomyopathy (ARVC)
ko05414	82	1	0	100	0	#REF!	#REF!		Human Diseases	Cardiovascular Diseases	Dilated cardiomyopathy (DCM)
ko05416	38	2	0	100	0	#REF!	#REF!		Human Diseases	Cardiovascular Diseases	Viral myocarditis

## Sheet: Pathways
	L1	L2	L3
ko00010	Metabolism	Carbohydrate Metabolism	Glycolysis / Gluconeogenesis
ko00020	Metabolism	Carbohydrate Metabolism	Citrate cycle (TCA cycle)
ko00030	Metabolism	Carbohydrate Metabolism	Pentose phosphate pathway
ko00040	Metabolism	Carbohydrate Metabolism	Pentose and glucuronate interconversions
ko00051	Metabolism	Carbohydrate Metabolism	Fructose and mannose metabolism
ko00052	Metabolism	Carbohydrate Metabolism	Galactose metabolism
ko00053	Metabolism	Carbohydrate Metabolism	Ascorbate and aldarate metabolism
ko00061	Metabolism	Lipid Metabolism	Fatty acid biosynthesis
ko00062	Metabolism	Lipid Metabolism	Fatty acid elongation in mitochondria
ko00071	Metabolism	Lipid Metabolism	Fatty acid metabolism
ko00072	Metabolism	Lipid Metabolism	Synthesis and degradation of ketone bodies
ko00100	Metabolism	Lipid Metabolism	Steroid biosynthesis
ko00120	Metabolism	Lipid Metabolism	Primary bile acid biosynthesis
ko00121	Metabolism	Lipid Metabolism	Secondary bile acid biosynthesis
ko00130	Metabolism	Metabolism of Cofactors and Vitamins	Ubiquinone and other terpenoid-quinone biosynthesis
ko00140	Metabolism	Lipid Metabolism	Steroid hormone biosynthesis
ko00190	Metabolism	Energy Metabolism	Oxidative phosphorylation
ko00194	Metabolism	Energy Metabolism	Photosynthesis proteins
ko00195	Metabolism	Energy Metabolism	Photosynthesis
ko00196	Metabolism	Energy Metabolism	Photosynthesis - antenna proteins
ko00199	Metabolism	Enzyme Families	Cytochrome P450
ko00230	Metabolism	Nucleotide Metabolism	Purine metabolism
ko00231	Metabolism	Biosynthesis of Other Secondary Metabolites	Puromycin biosynthesis
ko00232	Metabolism	Biosynthesis of Other Secondary Metabolites	Caffeine metabolism
ko00240	Metabolism	Nucleotide Metabolism	Pyrimidine metabolism
ko00250	Metabolism	Amino Acid Metabolism	Alanine, aspartate and glutamate metabolism
ko00253	Metabolism	Metabolism of Terpenoids and Polyketides	Tetracycline biosynthesis
ko00260	Metabolism	Amino Acid Metabolism	Glycine, serine and threonine metabolism
ko00270	Metabolism	Amino Acid Metabolism	Cysteine and methionine metabolism
ko00280	Metabolism	Amino Acid Metabolism	Valine, leucine and isoleucine degradation
ko00281	Metabolism	Metabolism of Terpenoids and Polyketides	Geraniol degradation
ko00290	Metabolism	Amino Acid Metabolism	Valine, leucine and isoleucine biosynthesis
ko00300	Metabolism	Amino Acid Metabolism	Lysine biosynthesis
ko00310	Metabolism	Amino Acid Metabolism	Lysine degradation
ko00311	Metabolism	Biosynthesis of Other Secondary Metabolites	Penicillin and cephalosporin biosynthesis
ko00312	Metabolism	Biosynthesis of Other Secondary Metabolites	beta-Lactam resistance
ko00330	Metabolism	Amino Acid Metabolism	Arginine and proline metabolism
ko00331	Metabolism	Biosynthesis of Other Secondary Metabolites	Clavulanic acid biosynthesis
ko00340	Metabolism	Amino Acid Metabolism	Histidine metabolism
ko00350	Metabolism	Amino Acid Metabolism	Tyrosine metabolism
ko00351	Metabolism	Xenobiotics Biodegradation and Metabolism	1,1,1-Trichloro-2,2-bis(4-chlorophenyl)ethane (DDT) degradation
ko00360	Metabolism	Amino Acid Metabolism	Phenylalanine metabolism
ko00361	Metabolism	Xenobiotics Biodegradation and Metabolism	Chlorocyclohexane and chlorobenzene degradation
ko00362	Metabolism	Xenobiotics Biodegradation and Metabolism	Benzoate degradation
ko00363	Metabolism	Xenobiotics Biodegradation and Metabolism	Bisphenol degradation
ko00364	Metabolism	Xenobiotics Biodegradation and Metabolism	Fluorobenzoate degradation
ko00380	Metabolism	Amino Acid Metabolism	Tryptophan metabolism
ko00400	Metabolism	Amino Acid Metabolism	Phenylalanine, tyrosine and tryptophan biosynthesis
ko00401	Metabolism	Biosynthesis of Other Secondary Metabolites	Novobiocin biosynthesis
ko00402	Metabolism	Biosynthesis of Other Secondary Metabolites	Benzoxazinoid biosynthesis
ko00410	Metabolism	Metabolism of Other Amino Acids	beta-Alanine metabolism
ko00430	Metabolism	Metabolism of Other Amino Acids	Taurine and hypotaurine metabolism
ko00440	Metabolism	Metabolism of Other Amino Acids	Phosphonate and phosphinate metabolism
ko00450	Metabolism	Metabolism of Other Amino Acids	Selenocompound metabolism
ko00460	Metabolism	Metabolism of Other Amino Acids	Cyanoamino acid metabolism
ko00471	Metabolism	Metabolism of Other Amino Acids	D-Glutamine and D-glutamate metabolism
ko00472	Metabolism	Metabolism of Other Amino Acids	D-Arginine and D-ornithine metabolism
ko00473	Metabolism	Metabolism of Other Amino Acids	D-Alanine metabolism
ko00480	Metabolism	Metabolism of Other Amino Acids	Glutathione metabolism
ko00500	Metabolism	Carbohydrate Metabolism	Starch and sucrose metabolism
ko00510	Metabolism	Glycan Biosynthesis and Metabolism	N-Glycan biosynthesis
ko00511	Metabolism	Glycan Biosynthesis and Metabolism	Other glycan degradation
ko00512	Metabolism	Glycan Biosynthesis and Metabolism	Mucin type O-glycan biosynthesis
ko00513	Metabolism	Glycan Biosynthesis and Metabolism	Various types of N-glycan biosynthesis
ko00514	Metabolism	Glycan Biosynthesis and Metabolism	Other types of O-glycan biosynthesis
ko00520	Metabolism	Carbohydrate Metabolism	Amino sugar and nucleotide sugar metabolism
ko00521	Metabolism	Biosynthesis of Other Secondary Metabolites	Streptomycin biosynthesis
ko00522	Metabolism	Metabolism of Terpenoids and Polyketides	Biosynthesis of 12-, 14- and 16-membered macrolides
ko00523	Metabolism	Metabolism of Terpenoids and Polyketides	Polyketide sugar unit biosynthesis
ko00524	Metabolism	Biosynthesis of Other Secondary Metabolites	Butirosin and neomycin biosynthesis
ko00531	Metabolism	Glycan Biosynthesis and Metabolism	Glycosaminoglycan degradation
ko00532	Metabolism	Glycan Biosynthesis and Metabolism	Glycosaminoglycan biosynthesis - chondroitin sulfate
ko00533	Metabolism	Glycan Biosynthesis and Metabolism	Glycosaminoglycan biosynthesis - keratan sulfate
ko00534	Metabolism	Glycan Biosynthesis and Metabolism	Glycosaminoglycan biosynthesis - heparan sulfate
ko00535	Metabolism	Glycan Biosynthesis and Metabolism	Proteoglycans
ko00540	Metabolism	Glycan Biosynthesis and Metabolism	Lipopolysaccharide biosynthesis
ko00550	Metabolism	Glycan Biosynthesis and Metabolism	Peptidoglycan biosynthesis
ko00561	Metabolism	Lipid Metabolism	Glycerolipid metabolism
ko00562	Metabolism	Carbohydrate Metabolism	Inositol phosphate metabolism
ko00563	Metabolism	Glycan Biosynthesis and Metabolism	Glycosylphosphatidylinositol(GPI)-anchor biosynthesis
ko00564	Metabolism	Lipid Metabolism	Glycerophospholipid metabolism
ko00565	Metabolism	Lipid Metabolism	Ether lipid metabolism
ko00590	Metabolism	Lipid Metabolism	Arachidonic acid metabolism
ko00591	Metabolism	Lipid Metabolism	Linoleic acid metabolism
ko00592	Metabolism	Lipid Metabolism	alpha-Linolenic acid metabolism
ko00600	Metabolism	Lipid Metabolism	Sphingolipid metabolism
ko00601	Metabolism	Glycan Biosynthesis and Metabolism	Glycosphingolipid biosynthesis - lacto and neolacto series
ko00603	Metabolism	Glycan Biosynthesis and Metabolism	Glycosphingolipid biosynthesis - globo series
ko00604	Metabolism	Glycan Biosynthesis and Metabolism	Glycosphingolipid biosynthesis - ganglio series
ko00620	Metabolism	Carbohydrate Metabolism	Pyruvate metabolism
ko00621	Metabolism	Xenobiotics Biodegradation and Metabolism	Dioxin degradation
ko00622	Metabolism	Xenobiotics Biodegradation and Metabolism	Xylene degradation
ko00623	Metabolism	Xenobiotics Biodegradation and Metabolism	Toluene degradation
ko00624	Metabolism	Xenobiotics Biodegradation and Metabolism	Polycyclic aromatic hydrocarbon degradation
ko00625	Metabolism	Xenobiotics Biodegradation and Metabolism	Chloroalkane and chloroalkene degradation
ko00626	Metabolism	Xenobiotics Biodegradation and Metabolism	Naphthalene degradation
ko00627	Metabolism	Xenobiotics Biodegradation and Metabolism	Aminobenzoate degradation
ko00630	Metabolism	Carbohydrate Metabolism	Glyoxylate and dicarboxylate metabolism
ko00633	Metabolism	Xenobiotics Biodegradation and Metabolism	Nitrotoluene degradation
ko00640	Metabolism	Carbohydrate Metabolism	Propanoate metabolism
ko00642	Metabolism	Xenobiotics Biodegradation and Metabolism	Ethylbenzene degradation
ko00643	Metabolism	Xenobiotics Biodegradation and Metabolism	Styrene degradation
ko00650	Metabolism	Carbohydrate Metabolism	Butanoate metabolism
ko00660	Metabolism	Carbohydrate Metabolism	C5-Branched dibasic acid metabolism
ko00670	Metabolism	Metabolism of Cofactors and Vitamins	One carbon pool by folate
ko00680	Metabolism	Energy Metabolism	Methane metabolism
ko00710	Metabolism	Energy Metabolism	Carbon fixation in photosynthetic organisms
ko00720	Metabolism	Energy Metabolism	Carbon fixation pathways in prokaryotes
ko00730	Metabolism	Metabolism of Cofactors and Vitamins	Thiamine metabolism
ko00740	Metabolism	Metabolism of Cofactors and Vitamins	Riboflavin metabolism
ko00750	Metabolism	Metabolism of Cofactors and Vitamins	Vitamin B6 metabolism
ko00760	Metabolism	Metabolism of Cofactors and Vitamins	Nicotinate and nicotinamide metabolism
ko00770	Metabolism	Metabolism of Cofactors and Vitamins	Pantothenate and CoA biosynthesis
ko00780	Metabolism	Metabolism of Cofactors and Vitamins	Biotin metabolism
ko00785	Metabolism	Metabolism of Cofactors and Vitamins	Lipoic acid metabolism
ko00790	Metabolism	Metabolism of Cofactors and Vitamins	Folate biosynthesis
ko00791	Metabolism	Xenobiotics Biodegradation and Metabolism	Atrazine degradation
ko00830	Metabolism	Metabolism of Cofactors and Vitamins	Retinol metabolism
ko00860	Metabolism	Metabolism of Cofactors and Vitamins	Porphyrin and chlorophyll metabolism
ko00900	Metabolism	Metabolism of Terpenoids and Polyketides	Terpenoid backbone biosynthesis
ko00901	Metabolism	Biosynthesis of Other Secondary Metabolites	Indole alkaloid biosynthesis
ko00902	Metabolism	Metabolism of Terpenoids and Polyketides	Monoterpenoid biosynthesis
ko00903	Metabolism	Metabolism of Terpenoids and Polyketides	Limonene and pinene degradation
ko00904	Metabolism	Metabolism of Terpenoids and Polyketides	Diterpenoid biosynthesis
ko00905	Metabolism	Metabolism of Terpenoids and Polyketides	Brassinosteroid biosynthesis
ko00906	Metabolism	Metabolism of Terpenoids and Polyketides	Carotenoid biosynthesis
ko00908	Metabolism	Metabolism of Terpenoids and Polyketides	Zeatin biosynthesis
ko00909	Metabolism	Metabolism of Terpenoids and Polyketides	Sesquiterpenoid biosynthesis
ko00910	Metabolism	Energy Metabolism	Nitrogen metabolism
ko00920	Metabolism	Energy Metabolism	Sulfur metabolism
ko00930	Metabolism	Xenobiotics Biodegradation and Metabolism	Caprolactam degradation
ko00940	Metabolism	Biosynthesis of Other Secondary Metabolites	Phenylpropanoid biosynthesis
ko00941	Metabolism	Biosynthesis of Other Secondary Metabolites	Flavonoid biosynthesis
ko00942	Metabolism	Biosynthesis of Other Secondary Metabolites	Anthocyanin biosynthesis
ko00943	Metabolism	Biosynthesis of Other Secondary Metabolites	Isoflavonoid biosynthesis
ko00944	Metabolism	Biosynthesis of Other Secondary Metabolites	Flavone and flavonol biosynthesis
ko00945	Metabolism	Biosynthesis of Other Secondary Metabolites	Stilbenoid, diarylheptanoid and gingerol biosynthesis
ko00950	Metabolism	Biosynthesis of Other Secondary Metabolites	Isoquinoline alkaloid biosynthesis
ko00960	Metabolism	Biosynthesis of Other Secondary Metabolites	Tropane, piperidine and pyridine alkaloid biosynthesis
ko00965	Metabolism	Biosynthesis of Other Secondary Metabolites	Betalain biosynthesis
ko00966	Metabolism	Biosynthesis of Other Secondary Metabolites	Glucosinolate biosynthesis
ko00970	Genetic Information Processing	Translation	Aminoacyl-tRNA biosynthesis
ko00980	Metabolism	Xenobiotics Biodegradation and Metabolism	Metabolism of xenobiotics by cytochrome P450
ko00981	Metabolism	Metabolism of Terpenoids and Polyketides	Insect hormone biosynthesis
ko00982	Metabolism	Xenobiotics Biodegradation and Metabolism	Drug metabolism - cytochrome P450
ko00983	Metabolism	Xenobiotics Biodegradation and Metabolism	Drug metabolism - other enzymes
ko01001	Metabolism	Enzyme Families	Protein kinases
ko01002	Metabolism	Enzyme Families	Peptidases
ko01003	Metabolism	Glycan Biosynthesis and Metabolism	Glycosyltransferases
ko01004	Metabolism	Lipid Metabolism	Lipid biosynthesis proteins
ko01005	Metabolism	Glycan Biosynthesis and Metabolism	Lipopolysaccharide biosynthesis proteins
ko01006	Metabolism	Metabolism of Terpenoids and Polyketides	Prenyltransferases
ko01007	Metabolism	Amino Acid Metabolism	Amino acid related enzymes
ko01020	Environmental Information Processing	Signaling Molecules and Interaction	Enzyme-linked receptors
ko01040	Metabolism	Lipid Metabolism	Biosynthesis of unsaturated fatty acids
ko01051	Metabolism	Metabolism of Terpenoids and Polyketides	Biosynthesis of ansamycins
ko01053	Metabolism	Metabolism of Terpenoids and Polyketides	Biosynthesis of siderophore group nonribosomal peptides
ko01055	Metabolism	Metabolism of Terpenoids and Polyketides	Biosynthesis of vancomycin group antibiotics
ko01056	Metabolism	Metabolism of Terpenoids and Polyketides	Biosynthesis of type II polyketide backbone
ko01057	Metabolism	Metabolism of Terpenoids and Polyketides	Biosynthesis of type II polyketide products
ko01058	Metabolism	Biosynthesis of Other Secondary Metabolites	Acridone alkaloid biosynthesis
ko02000	Environmental Information Processing	Membrane Transport	Transporters
ko02010	Environmental Information Processing	Membrane Transport	ABC transporters
ko02020	Environmental Information Processing	Signal Transduction	Two-component system
ko02022	Environmental Information Processing	Signal Transduction	Two-component system
ko02030	Cellular Processes	Cell Motility	Bacterial chemotaxis
ko02035	Cellular Processes	Cell Motility	Bacterial motility proteins
ko02040	Cellular Processes	Cell Motility	Flagellar assembly
ko02042	Environmental Information Processing	Signaling Molecules and Interaction	Bacterial toxins
ko02044	Environmental Information Processing	Membrane Transport	Secretion system
ko02060	Environmental Information Processing	Membrane Transport	Phosphotransferase system (PTS)
ko03000	Genetic Information Processing	Transcription	Transcription factors
ko03008	Genetic Information Processing	Translation	Ribosome biogenesis in eukaryotes
ko03009	Genetic Information Processing	Translation	Ribosome Biogenesis
ko03010	Genetic Information Processing	Translation	Ribosome
ko03011	Genetic Information Processing	Translation	Ribosome
ko03012	Genetic Information Processing	Translation	Translation factors
ko03013	Genetic Information Processing	Translation	RNA transport
ko03015	Genetic Information Processing	Translation	mRNA surveillance pathway
ko03018	Genetic Information Processing	Folding, Sorting and Degradation	RNA degradation
ko03020	Genetic Information Processing	Transcription	RNA polymerase
ko03022	Genetic Information Processing	Transcription	Basal transcription factors
ko03030	Genetic Information Processing	Replication and Repair	DNA replication
ko03032	Genetic Information Processing	Replication and Repair	DNA replication proteins
ko03036	Genetic Information Processing	Replication and Repair	Chromosome
ko03040	Genetic Information Processing	Transcription	Spliceosome
ko03041	Genetic Information Processing	Transcription	Spliceosome
ko03050	Genetic Information Processing	Folding, Sorting and Degradation	Proteasome
ko03051	Genetic Information Processing	Folding, Sorting and Degradation	Proteasome
ko03060	Genetic Information Processing	Folding, Sorting and Degradation	Protein export
ko03070	Environmental Information Processing	Membrane Transport	Bacterial secretion system
ko03110	Genetic Information Processing	Folding, Sorting and Degradation	Chaperones and folding catalysts
ko03310	Environmental Information Processing	Signaling Molecules and Interaction	Nuclear receptors
ko03320	Organismal Systems	Endocrine System	PPAR signaling pathway
ko03400	Genetic Information Processing	Replication and Repair	DNA repair and recombination proteins
ko03410	Genetic Information Processing	Replication and Repair	Base excision repair
ko03420	Genetic Information Processing	Replication and Repair	Nucleotide excision repair
ko03430	Genetic Information Processing	Replication and Repair	Mismatch repair
ko03440	Genetic Information Processing	Replication and Repair	Homologous recombination
ko03450	Genetic Information Processing	Replication and Repair	Non-homologous end-joining
ko04010	Environmental Information Processing	Signal Transduction	MAPK signaling pathway
ko04011	Environmental Information Processing	Signal Transduction	MAPK signaling pathway - yeast
ko04012	Environmental Information Processing	Signal Transduction	ErbB signaling pathway
ko04013	Environmental Information Processing	Signal Transduction	MAPK signaling pathway - fly
ko04020	Environmental Information Processing	Signal Transduction	Calcium signaling pathway
ko04030	Environmental Information Processing	Signaling Molecules and Interaction	G protein-coupled receptors
ko04031	Environmental Information Processing	Signaling Molecules and Interaction	GTP-binding proteins
ko04040	Environmental Information Processing	Signaling Molecules and Interaction	Ion channels
ko04050	Environmental Information Processing	Signaling Molecules and Interaction	Cytokine receptors
ko04052	Environmental Information Processing	Signaling Molecules and Interaction	Cytokines
ko04060	Environmental Information Processing	Signaling Molecules and Interaction	Cytokine-cytokine receptor interaction
ko04062	Organismal Systems	Immune System	Chemokine signaling pathway
ko04070	Environmental Information Processing	Signal Transduction	Phosphatidylinositol signaling system
ko04075	Environmental Information Processing	Signal Transduction	Plant hormone signal transduction
ko04080	Environmental Information Processing	Signaling Molecules and Interaction	Neuroactive ligand-receptor interaction
ko04090	Environmental Information Processing	Signaling Molecules and Interaction	Cellular antigens
ko04091	Environmental Information Processing	Signaling Molecules and Interaction	Glycan bindng proteins
ko04110	Cellular Processes	Cell Growth and Death	Cell cycle
ko04111	Cellular Processes	Cell Growth and Death	Cell cycle - yeast
ko04112	Cellular Processes	Cell Growth and Death	Cell cycle - Caulobacter
ko04113	Cellular Processes	Cell Growth and Death	Meiosis - yeast
ko04114	Cellular Processes	Cell Growth and Death	Oocyte meiosis
ko04115	Cellular Processes	Cell Growth and Death	p53 signaling pathway
ko04120	Genetic Information Processing	Folding, Sorting and Degradation	Ubiquitin mediated proteolysis
ko04121	Genetic Information Processing	Folding, Sorting and Degradation	Ubiquitin system
ko04122	Genetic Information Processing	Folding, Sorting and Degradation	Sulfur relay system
ko04130	Genetic Information Processing	Folding, Sorting and Degradation	SNARE interactions in vesicular transport
ko04131	Genetic Information Processing	Folding, Sorting and Degradation	SNAREs
ko04140	Cellular Processes	Transport and Catabolism	Regulation of autophagy
ko04141	Genetic Information Processing	Folding, Sorting and Degradation	Protein processing in endoplasmic reticulum
ko04142	Cellular Processes	Transport and Catabolism	Lysosome
ko04144	Cellular Processes	Transport and Catabolism	Endocytosis
ko04145	Cellular Processes	Transport and Catabolism	Phagosome
ko04146	Cellular Processes	Transport and Catabolism	Peroxisome
ko04150	Environmental Information Processing	Signal Transduction	mTOR signaling pathway
ko04210	Cellular Processes	Cell Growth and Death	Apoptosis
ko04260	Organismal Systems	Circulatory System	Cardiac muscle contraction
ko04270	Organismal Systems	Circulatory System	Vascular smooth muscle contraction
ko04310	Environmental Information Processing	Signal Transduction	Wnt signaling pathway
ko04320	Organismal Systems	Development	Dorso-ventral axis formation
ko04330	Environmental Information Processing	Signal Transduction	Notch signaling pathway
ko04340	Environmental Information Processing	Signal Transduction	Hedgehog signaling pathway
ko04350	Environmental Information Processing	Signal Transduction	TGF-beta signaling pathway
ko04360	Organismal Systems	Development	Axon guidance
ko04370	Environmental Information Processing	Signal Transduction	VEGF signaling pathway
ko04380	Organismal Systems	Development	Osteoclast differentiation
ko04510	Cellular Processes	Cell Communication	Focal adhesion
ko04512	Environmental Information Processing	Signaling Molecules and Interaction	ECM-receptor interaction
ko04514	Environmental Information Processing	Signaling Molecules and Interaction	Cell adhesion molecules (CAMs)
ko04515	Environmental Information Processing	Signaling Molecules and Interaction	Cell adhesion molecules (CAMs)
ko04516	Environmental Information Processing	Signaling Molecules and Interaction	CAM ligands
ko04520	Cellular Processes	Cell Communication	Adherens junction
ko04530	Cellular Processes	Cell Communication	Tight junction
ko04540	Cellular Processes	Cell Communication	Gap junction
ko04610	Organismal Systems	Immune System	Complement and coagulation cascades
ko04612	Organismal Systems	Immune System	Antigen processing and presentation
ko04614	Organismal Systems	Endocrine System	Renin-angiotensin system
ko04620	Organismal Systems	Immune System	Toll-like receptor signaling pathway
ko04621	Organismal Systems	Immune System	NOD-like receptor signaling pathway
ko04622	Organismal Systems	Immune System	RIG-I-like receptor signaling pathway
ko04623	Organismal Systems	Immune System	Cytosolic DNA-sensing pathway
ko04626	Organismal Systems	Environmental Adaptation	Plant-pathogen interaction
ko04630	Environmental Information Processing	Signal Transduction	Jak-STAT signaling pathway
ko04640	Organismal Systems	Immune System	Hematopoietic cell lineage
ko04650	Organismal Systems	Immune System	Natural killer cell mediated cytotoxicity
ko04660	Organismal Systems	Immune System	T cell receptor signaling pathway
ko04662	Organismal Systems	Immune System	B cell receptor signaling pathway
ko04664	Organismal Systems	Immune System	Fc epsilon RI signaling pathway
ko04666	Organismal Systems	Immune System	Fc gamma R-mediated phagocytosis
ko04670	Organismal Systems	Immune System	Leukocyte transendothelial migration
ko04672	Organismal Systems	Immune System	Intestinal immune network for IgA production
ko04710	Organismal Systems	Environmental Adaptation	Circadian rhythm - mammal
ko04711	Organismal Systems	Environmental Adaptation	Circadian rhythm - fly
ko04712	Organismal Systems	Environmental Adaptation	Circadian rhythm - plant
ko04720	Organismal Systems	Nervous System	Long-term potentiation
ko04722	Organismal Systems	Nervous System	Neurotrophin signaling pathway
ko04730	Organismal Systems	Nervous System	Long-term depression
ko04740	Organismal Systems	Sensory System	Olfactory transduction
ko04742	Organismal Systems	Sensory System	Taste transduction
ko04744	Organismal Systems	Sensory System	Phototransduction
ko04745	Organismal Systems	Sensory System	Phototransduction - fly
ko04810	Cellular Processes	Cell Motility	Regulation of actin cytoskeleton
ko04812	Cellular Processes	Cell Motility	Cytoskeleton proteins
ko04910	Organismal Systems	Endocrine System	Insulin signaling pathway
ko04912	Organismal Systems	Endocrine System	GnRH signaling pathway
ko04914	Organismal Systems	Endocrine System	Progesterone-mediated oocyte maturation
ko04916	Organismal Systems	Endocrine System	Melanogenesis
ko04920	Organismal Systems	Endocrine System	Adipocytokine signaling pathway
ko04930	Human Diseases	Metabolic Diseases	Type II diabetes mellitus
ko04940	Human Diseases	Metabolic Diseases	Type I diabetes mellitus
ko04950	Human Diseases	Metabolic Diseases	Maturity onset diabetes of the young
ko04960	Organismal Systems	Excretory System	Aldosterone-regulated sodium reabsorption
ko04961	Organismal Systems	Excretory System	Endocrine and other factor-regulated calcium reabsorption
ko04962	Organismal Systems	Excretory System	Vasopressin-regulated water reabsorption
ko04964	Organismal Systems	Excretory System	Proximal tubule bicarbonate reclamation
ko04966	Organismal Systems	Excretory System	Collecting duct acid secretion
ko04970	Organismal Systems	Digestive System	Salivary secretion
ko04971	Organismal Systems	Digestive System	Gastric acid secretion
ko04972	Organismal Systems	Digestive System	Pancreatic secretion
ko04973	Organismal Systems	Digestive System	Carbohydrate digestion and absorption
ko04974	Organismal Systems	Digestive System	Protein digestion and absorption
ko04975	Organismal Systems	Digestive System	Fat digestion and absorption
ko04976	Organismal Systems	Digestive System	Bile secretion
ko04977	Organismal Systems	Digestive System	Vitamin digestion and absorption
ko04978	Organismal Systems	Digestive System	Mineral absorption
ko05010	Human Diseases	Neurodegenerative Diseases	Alzheimer's disease
ko05012	Human Diseases	Neurodegenerative Diseases	Parkinson's disease
ko05014	Human Diseases	Neurodegenerative Diseases	Amyotrophic lateral sclerosis (ALS)
ko05016	Human Diseases	Neurodegenerative Diseases	Huntington's disease
ko05020	Human Diseases	Neurodegenerative Diseases	Prion diseases
ko05100	Human Diseases	Infectious Diseases	Bacterial invasion of epithelial cells
ko05110	Human Diseases	Infectious Diseases	Vibrio cholerae infection
ko05111	Human Diseases	Infectious Diseases	Vibrio cholerae pathogenic cycle
ko05120	Human Diseases	Infectious Diseases	Epithelial cell signaling in Helicobacter pylori infection
ko05130	Human Diseases	Infectious Diseases	Pathogenic Escherichia coli infection
ko05131	Human Diseases	Infectious Diseases	Shigellosis
ko05140	Human Diseases	Infectious Diseases	Leishmaniasis
ko05142	Human Diseases	Infectious Diseases	Chagas disease (American trypanosomiasis)
ko05143	Human Diseases	Infectious Diseases	African trypanosomiasis
ko05144	Human Diseases	Infectious Diseases	Malaria
ko05145	Human Diseases	Infectious Diseases	Toxoplasmosis
ko05146	Human Diseases	Infectious Diseases	Amoebiasis
ko05150	Human Diseases	Infectious Diseases	Staphylococcus aureus infection
ko05152	Human Diseases	Infectious Diseases	Tuberculosis
ko05160	Human Diseases	Infectious Diseases	Hepatitis C
ko05162	Human Diseases	Infectious Diseases	Measles
ko05200	Human Diseases	Cancers	Pathways in cancer
ko05210	Human Diseases	Cancers	Colorectal cancer
ko05211	Human Diseases	Cancers	Renal cell carcinoma
ko05212	Human Diseases	Cancers	Pancreatic cancer
ko05213	Human Diseases	Cancers	Endometrial cancer
ko05214	Human Diseases	Cancers	Glioma
ko05215	Human Diseases	Cancers	Prostate cancer
ko05216	Human Diseases	Cancers	Thyroid cancer
ko05217	Human Diseases	Cancers	Basal cell carcinoma
ko05218	Human Diseases	Cancers	Melanoma
ko05219	Human Diseases	Cancers	Bladder cancer
ko05220	Human Diseases	Cancers	Chronic myeloid leukemia
ko05221	Human Diseases	Cancers	Acute myeloid leukemia
ko05222	Human Diseases	Cancers	Small cell lung cancer
ko05223	Human Diseases	Cancers	Non-small cell lung cancer
ko05310	Human Diseases	Immune System Diseases	Asthma
ko05320	Human Diseases	Immune System Diseases	Autoimmune thyroid disease
ko05322	Human Diseases	Immune System Diseases	Systemic lupus erythematosus
ko05323	Human Diseases	Immune System Diseases	Rheumatoid arthritis
ko05330	Human Diseases	Immune System Diseases	Allograft rejection
ko05332	Human Diseases	Immune System Diseases	Graft-versus-host disease
ko05340	Human Diseases	Immune System Diseases	Primary immunodeficiency
ko05410	Human Diseases	Cardiovascular Diseases	Hypertrophic cardiomyopathy (HCM)
ko05412	Human Diseases	Cardiovascular Diseases	Arrhythmogenic right ventricular cardiomyopathy (ARVC)
ko05414	Human Diseases	Cardiovascular Diseases	Dilated cardiomyopathy (DCM)
ko05416	Human Diseases	Cardiovascular Diseases	Viral myocarditis
