# Supplementary material for: Deep Illumina-Based Shotgun Sequencing Reveals Dietary Effects on the Structure and Function of the Fecal Microbiome of Growing Kittens
Source: PLoS One. 2014 Jul 10;9(7):e101021. doi: 10.1371/journal.pone.0101021 (PMC4091873; doi:10.1371/journal.pone.0101021)
Supplement: Table S7 — Biochemical pathways identified in feces kittens fed a high-protein, low-carbohydrate or moderate-protein, moderate-carbohydrate diet. (XLSX) [file pone.0101021.s007.xlsx]

## Sheet: Sheet1
Supplementary Table 7
OrgOrder	KEGG L3 ID	HPLC mean	MPMC mean	KEGG L1	KEGG L2	KEGG L3	Significant (Pathway contains more L4 with significant diet differences than random)	H+1	M+1	FC	Fcoth	FC/DIR	FC/DIR	GraphOrder	Cluster	L4s in path (DB)	L4s in path (Found)	L4s in path (Sig)	Link	Link	KEGG L4s with significant diet differences within L3
28	ko00680	0.0109409	0.00966444	Metabolism	Energy Metabolism	Methane metabolism	0	0.0109409	0.00966445	1.13208	0.883331	1.13208	-1.13208	280	1	192	184	48	http://www.genome.jp/kegg-bin/search_pathway_object?org_name=ko&amp;unclassified=%20K00058%20K00123%20K00124%20K00169%20K00170%20K00172%20K00190%20K00194%20K00197%20K00198%20K00297%20K00320%20K00400%20K00442%20K00533%20K00534%20K00578%20K00625%20K00830%20K00831%20K00850%20K00863%20K00865%20K00925%20K01007%20K01595%20K01621%20K01689%20K02117%20K02118%20K02119%20K02120%20K02124%20K03313%20K03388%20…	http://www.genome.jp/kegg-bin/search_pathway_object?org_name=ko&amp;unclassified=%20K00058%20K00123%20K00124%20K00169%20K00170%20K00172%20K00190%20K00194%20K00197%20K00198%20K00297%20K00320%20K00400%20K00442%20K00533%20K00534%20K00578%20K00625%20K00830%20K00831%20K00850%20K00863%20K00865%20K00925%20K01007%20K01595%20K01621%20K01689%20K02117%20K02118%20K02119%20K02120%20K02124%20K03313%20K03388%20…	K00058	K00123	K00124	K00169	K00170	K00172	K00190	K00194	K00197	K00198	K00297	K00320	K00400	K00442	K00533	K00534	K00578	K00625	K00830	K00831	K00850	K00863	K00865	K00925	K01007	K01595	K01621	K01689	K02117
166	ko03018	0.0109465	0.00953234	Genetic Information Processing	Folding, Sorting and Degradation	RNA degradation	0	0.0109465	0.00953234	1.14836	0.870808	1.14836	-1.14836	279	1	75	21	12	http://www.genome.jp/kegg-bin/search_pathway_object?org_name=ko&amp;unclassified=%20K00970%20K01689%20K03628%20K03654%20K03666%20K04043%20K05592%20K08300%20K11600%20K11927%20K12573%20%20%20%20%20%20%20%20%20%20%20%20%20%20%20%20%20%20%20%20%20%20%20%20%20%20%20%20%20%20%20%20%20%20%20%20%20%20%20%20%20%20%20%20%20%20%20%20%20%20%20%20%20%20%20%20%20%20%20%20%20%20%20%20%20%20%20%20%20%20%20%20%20…	http://www.genome.jp/kegg-bin/search_pathway_object?org_name=ko&amp;unclassified=%20K00970%20K01689%20K03628%20K03654%20K03666%20K04043%20K05592%20K08300%20K11600%20K11927%20K12573%20%20%20%20%20%20%20%20%20%20%20%20%20%20%20%20%20%20%20%20%20%20%20%20%20%20%20%20%20%20%20%20%20%20%20%20%20%20%20%20%20%20%20%20%20%20%20%20%20%20%20%20%20%20%20%20%20%20%20%20%20%20%20%20%20%20%20%20%20%20%20%20%20…	K00970	K01689	K03628	K03654	K03666	K04043	K05592	K08300	K11600	K11927	K12573
34	ko00710	0.0108767	0.00994942	Metabolism	Energy Metabolism	Carbon fixation in photosynthetic organisms	0	0.0108767	0.00994942	1.0932	0.914747	1.0932	-1.0932	278	1	36	31	17	http://www.genome.jp/kegg-bin/search_pathway_object?org_name=ko&amp;unclassified=%20K00028%20K00150%20K00615%20K00873%20K00927%20K01006%20K01595%20K01621%20K01623%20K01632%20K01783%20K01807%20K01808%20K02446%20K03841%20K04041%20K11358%20%20%20%20%20%20%20%20%20%20%20%20%20%20%20%20%20%20%20%20%20%20%20%20%20%20%20%20%20%20%20%20%20%20%20%20%20%20%20%20%20%20%20%20%20%20%20%20%20%20%20%20%20%20%20…	http://www.genome.jp/kegg-bin/search_pathway_object?org_name=ko&amp;unclassified=%20K00028%20K00150%20K00615%20K00873%20K00927%20K01006%20K01595%20K01621%20K01623%20K01632%20K01783%20K01807%20K01808%20K02446%20K03841%20K04041%20K11358%20%20%20%20%20%20%20%20%20%20%20%20%20%20%20%20%20%20%20%20%20%20%20%20%20%20%20%20%20%20%20%20%20%20%20%20%20%20%20%20%20%20%20%20%20%20%20%20%20%20%20%20%20%20%20…	K00028	K00150	K00615	K00873	K00927	K01006	K01595	K01621	K01623	K01632	K01783	K01807	K01808	K02446	K03841	K04041	K11358
35	ko00720	0.0107224	0.0105461	Metabolism	Energy Metabolism	Carbon fixation pathways in prokaryotes	0	0.0107224	0.0105461	1.01672	0.983558	1.01672	-1.01672	277	1	67	72	32	http://www.genome.jp/kegg-bin/search_pathway_object?org_name=ko&amp;unclassified=%20K00169%20K00170%20K00172%20K00177%20K00190%20K00239%20K00247%20K00297%20K00625%20K00626%20K00925%20K01007%20K01491%20K01595%20K01677%20K01678%20K01679%20K01681%20K01715%20K01848%20K01849%20K01902%20K01903%20K01962%20K01962,ko:K01963%20K01963%20K01965%20K05299%20K05606%20K13788%20K14138%20K14534%20%20%20%20%20%20%2…	http://www.genome.jp/kegg-bin/search_pathway_object?org_name=ko&amp;unclassified=%20K00169%20K00170%20K00172%20K00177%20K00190%20K00239%20K00247%20K00297%20K00625%20K00626%20K00925%20K01007%20K01491%20K01595%20K01677%20K01678%20K01679%20K01681%20K01715%20K01848%20K01849%20K01902%20K01903%20K01962%20K01962,ko:K01963%20K01963%20K01965%20K05299%20K05606%20K13788%20K14138%20K14534%20%20%20%20%20%20%2…	K00169	K00170	K00172	K00177	K00190	K00239	K00247	K00297	K00625	K00626	K00925	K01007	K01491	K01595	K01677	K01678	K01679	K01681	K01715	K01848	K01849	K01902	K01903	K01962	K01962,ko:K01963	K01963	K01965	K05299	K05606
221	ko03420	0.0102576	0.00957655	Genetic Information Processing	Replication and Repair	Nucleotide excision repair	0	0.0102576	0.00957655	1.07111	0.933609	1.07111	-1.07111	276	1	48	14	5	http://www.genome.jp/kegg-bin/search_pathway_object?org_name=ko&amp;unclassified=%20K01972%20K02335%20K03657%20K03703%20K03723%20%20%20%20%20%20%20%20%20%20%20%20%20%20%20%20%20%20%20%20%20%20%20%20%20%20%20%20%20%20%20%20%20%20%20%20%20%20%20%20%20%20%20%20%20%20%20%20%20%20%20%20%20%20%20%20%20%20%20%20%20%20%20%20%20%20%20%20%20%20%20%20%20%20%20%20%20%20%20%20%20%20%20%20%20%20%20%20%20%20%20…	http://www.genome.jp/kegg-bin/search_pathway_object?org_name=ko&amp;unclassified=%20K01972%20K02335%20K03657%20K03703%20K03723%20%20%20%20%20%20%20%20%20%20%20%20%20%20%20%20%20%20%20%20%20%20%20%20%20%20%20%20%20%20%20%20%20%20%20%20%20%20%20%20%20%20%20%20%20%20%20%20%20%20%20%20%20%20%20%20%20%20%20%20%20%20%20%20%20%20%20%20%20%20%20%20%20%20%20%20%20%20%20%20%20%20%20%20%20%20%20%20%20%20%20…	K01972	K02335	K03657	K03703	K03723
39	ko00030	0.00990073	0.00909735	Metabolism	Carbohydrate Metabolism	Pentose phosphate pathway	0	0.00990073	0.00909736	1.08831	0.918857	1.08831	-1.08831	275	1	44	46	22	http://www.genome.jp/kegg-bin/search_pathway_object?org_name=ko&amp;unclassified=%20K00033%20K00034%20K00036%20K00615%20K00850%20K00851%20K00852%20K00874%20K01057%20K01621%20K01623%20K01625%20K01783%20K01807%20K01808%20K01810%20K02446%20K03738%20K03841%20K04041%20K07404%20K11529%20%20%20%20%20%20%20%20%20%20%20%20%20%20%20%20%20%20%20%20%20%20%20%20%20%20%20%20%20%20%20%20%20%20%20%20%20%20%20%20…	http://www.genome.jp/kegg-bin/search_pathway_object?org_name=ko&amp;unclassified=%20K00033%20K00034%20K00036%20K00615%20K00850%20K00851%20K00852%20K00874%20K01057%20K01621%20K01623%20K01625%20K01783%20K01807%20K01808%20K01810%20K02446%20K03738%20K03841%20K04041%20K07404%20K11529%20%20%20%20%20%20%20%20%20%20%20%20%20%20%20%20%20%20%20%20%20%20%20%20%20%20%20%20%20%20%20%20%20%20%20%20%20%20%20%20…	K00033	K00034	K00036	K00615	K00850	K00851	K00852	K00874	K01057	K01621	K01623	K01625	K01783	K01807	K01808	K01810	K02446	K03738	K03841	K04041	K07404	K11529
230	ko03012	0.0112698	0.00927359	Genetic Information Processing	Translation	Translation factors	0	0.0112698	0.00927359	1.21525	0.822873	1.21525	-1.21525	274	1	50	26	6	http://www.genome.jp/kegg-bin/search_pathway_object?org_name=ko&amp;unclassified=%20K02355%20K02519%20K02520%20K02836%20K02839%20K03113%20%20%20%20%20%20%20%20%20%20%20%20%20%20%20%20%20%20%20%20%20%20%20%20%20%20%20%20%20%20%20%20%20%20%20%20%20%20%20%20%20%20%20%20%20%20%20%20%20%20%20%20%20%20%20%20%20%20%20%20%20%20%20%20%20%20%20%20%20%20%20%20%20%20%20%20%20%20%20%20%20%20%20%20%20%20%20%20…	http://www.genome.jp/kegg-bin/search_pathway_object?org_name=ko&amp;unclassified=%20K02355%20K02519%20K02520%20K02836%20K02839%20K03113%20%20%20%20%20%20%20%20%20%20%20%20%20%20%20%20%20%20%20%20%20%20%20%20%20%20%20%20%20%20%20%20%20%20%20%20%20%20%20%20%20%20%20%20%20%20%20%20%20%20%20%20%20%20%20%20%20%20%20%20%20%20%20%20%20%20%20%20%20%20%20%20%20%20%20%20%20%20%20%20%20%20%20%20%20%20%20%20…	K02355	K02519	K02520	K02836	K02839	K03113
90	ko00190	0.0113384	0.00880016	Metabolism	Energy Metabolism	Oxidative phosphorylation	0	0.0113384	0.00880016	1.28843	0.77614	1.28843	-1.28843	273	1	206	106	29	http://www.genome.jp/kegg-bin/search_pathway_object?org_name=ko&amp;unclassified=%20K00239%20K00247%20K00329%20K00331%20K00334%20K00335%20K00336%20K00937%20K01507%20K02108%20K02109%20K02111%20K02112%20K02113%20K02114%20K02115%20K02117%20K02118%20K02119%20K02120%20K02124%20K02275%20K02276%20K02299%20K05573%20K05575%20K05587%20K05903%20K06019%20%20%20%20%20%20%20%20%20%20%20%20%20%20%20%20%20%20%20…	http://www.genome.jp/kegg-bin/search_pathway_object?org_name=ko&amp;unclassified=%20K00239%20K00247%20K00329%20K00331%20K00334%20K00335%20K00336%20K00937%20K01507%20K02108%20K02109%20K02111%20K02112%20K02113%20K02114%20K02115%20K02117%20K02118%20K02119%20K02120%20K02124%20K02275%20K02276%20K02299%20K05573%20K05575%20K05587%20K05903%20K06019%20%20%20%20%20%20%20%20%20%20%20%20%20%20%20%20%20%20%20…	K00239	K00247	K00329	K00331	K00334	K00335	K00336	K00937	K01507	K02108	K02109	K02111	K02112	K02113	K02114	K02115	K02117	K02118	K02119	K02120	K02124	K02275	K02276	K02299	K05573	K05575	K05587	K05903	K06019
232	ko03020	0.0117984	0.00858356	Genetic Information Processing	Transcription	RNA polymerase	0	0.0117984	0.00858356	1.37453	0.727522	1.37453	-1.37453	272	1	60	30	9	http://www.genome.jp/kegg-bin/search_pathway_object?org_name=ko&amp;unclassified=%20K02405%20K03043%20K03048%20K03060%20K03087%20K03088%20K03089%20K03092%20K13798%20%20%20%20%20%20%20%20%20%20%20%20%20%20%20%20%20%20%20%20%20%20%20%20%20%20%20%20%20%20%20%20%20%20%20%20%20%20%20%20%20%20%20%20%20%20%20%20%20%20%20%20%20%20%20%20%20%20%20%20%20%20%20%20%20%20%20%20%20%20%20%20%20%20%20%20%20%20%20…	http://www.genome.jp/kegg-bin/search_pathway_object?org_name=ko&amp;unclassified=%20K02405%20K03043%20K03048%20K03060%20K03087%20K03088%20K03089%20K03092%20K13798%20%20%20%20%20%20%20%20%20%20%20%20%20%20%20%20%20%20%20%20%20%20%20%20%20%20%20%20%20%20%20%20%20%20%20%20%20%20%20%20%20%20%20%20%20%20%20%20%20%20%20%20%20%20%20%20%20%20%20%20%20%20%20%20%20%20%20%20%20%20%20%20%20%20%20%20%20%20%20…	K02405	K03043	K03048	K03060	K03087	K03088	K03089	K03092	K13798
223	ko03030	0.00886667	0.00935192	Genetic Information Processing	Replication and Repair	DNA replication	0	0.00886667	0.00935192	0.948112	1.05473	-1.05473	1.05473	271	1	51	24	14	http://www.genome.jp/kegg-bin/search_pathway_object?org_name=ko&amp;unclassified=%20K01972%20K02314%20K02316%20K02335%20K02337%20K02338%20K02340%20K02341%20K02342%20K02343%20K03111%20K03469%20K03470%20K03471%20%20%20%20%20%20%20%20%20%20%20%20%20%20%20%20%20%20%20%20%20%20%20%20%20%20%20%20%20%20%20%20%20%20%20%20%20%20%20%20%20%20%20%20%20%20%20%20%20%20%20%20%20%20%20%20%20%20%20%20%20%20%20%20…	http://www.genome.jp/kegg-bin/search_pathway_object?org_name=ko&amp;unclassified=%20K01972%20K02314%20K02316%20K02335%20K02337%20K02338%20K02340%20K02341%20K02342%20K02343%20K03111%20K03469%20K03470%20K03471%20%20%20%20%20%20%20%20%20%20%20%20%20%20%20%20%20%20%20%20%20%20%20%20%20%20%20%20%20%20%20%20%20%20%20%20%20%20%20%20%20%20%20%20%20%20%20%20%20%20%20%20%20%20%20%20%20%20%20%20%20%20%20%20…	K01972	K02314	K02316	K02335	K02337	K02338	K02340	K02341	K02342	K02343	K03111	K03469	K03470	K03471
11	ko00260	0.00853576	0.00914038	Metabolism	Amino Acid Metabolism	Glycine, serine and threonine metabolism	0	0.00853576	0.00914038	0.933851	1.07083	-1.07083	1.07083	270	1	67	69	27	http://www.genome.jp/kegg-bin/search_pathway_object?org_name=ko&amp;unclassified=%20K00003%20K00058%20K00060%20K00130%20K00133%20K00281%20K00282%20K00283%20K00303%20K00382%20K00605%20K00639%20K00830%20K00831%20K00865%20K00872%20K00928%20K00998%20K01620%20K01695%20K01696%20K01697%20K01733%20K01752%20K01753%20K01754%20K02204%20%20%20%20%20%20%20%20%20%20%20%20%20%20%20%20%20%20%20%20%20%20%20%20%20…	http://www.genome.jp/kegg-bin/search_pathway_object?org_name=ko&amp;unclassified=%20K00003%20K00058%20K00060%20K00130%20K00133%20K00281%20K00282%20K00283%20K00303%20K00382%20K00605%20K00639%20K00830%20K00831%20K00865%20K00872%20K00928%20K00998%20K01620%20K01695%20K01696%20K01697%20K01733%20K01752%20K01753%20K01754%20K02204%20%20%20%20%20%20%20%20%20%20%20%20%20%20%20%20%20%20%20%20%20%20%20%20%20…	K00003	K00058	K00060	K00130	K00133	K00281	K00282	K00283	K00303	K00382	K00605	K00639	K00830	K00831	K00865	K00872	K00928	K00998	K01620	K01695	K01696	K01697	K01733	K01752	K01753	K01754	K02204
93	ko00910	0.00877763	0.0102998	Metabolism	Energy Metabolism	Nitrogen metabolism	0	0.00877763	0.0102998	0.852218	1.17341	-1.17341	1.17341	269	1	99	95	30	http://www.genome.jp/kegg-bin/search_pathway_object?org_name=ko&amp;unclassified=%20K00260%20K00261%20K00262%20K00265%20K00266%20K00284%20K00366%20K00368%20K00370%20K00371%20K00605%20K01424%20K01501%20K01667%20K01668%20K01673%20K01744%20K01745%20K01760%20K02574%20K02587%20K02588%20K02594%20K03385%20K04014%20K04015%20K04748%20K04835%20K05601%20K14155%20%20%20%20%20%20%20%20%20%20%20%20%20%20%20%20…	http://www.genome.jp/kegg-bin/search_pathway_object?org_name=ko&amp;unclassified=%20K00260%20K00261%20K00262%20K00265%20K00266%20K00284%20K00366%20K00368%20K00370%20K00371%20K00605%20K01424%20K01501%20K01667%20K01668%20K01673%20K01744%20K01745%20K01760%20K02574%20K02587%20K02588%20K02594%20K03385%20K04014%20K04015%20K04748%20K04835%20K05601%20K14155%20%20%20%20%20%20%20%20%20%20%20%20%20%20%20%20…	K00260	K00261	K00262	K00265	K00266	K00284	K00366	K00368	K00370	K00371	K00605	K01424	K01501	K01667	K01668	K01673	K01744	K01745	K01760	K02574	K02587	K02588	K02594	K03385	K04014	K04015	K04748	K04835	K05601
199	ko02044	0.00925234	0.00831642	Environmental Information Processing	Membrane Transport	Secretion system	0	0.00925234	0.00831643	1.11254	0.898845	1.11254	-1.11254	268	1	396	337	63	http://www.genome.jp/kegg-bin/search_pathway_object?org_name=ko&amp;unclassified=%20K01493%20K02237%20K02238%20K02400%20K02401%20K02409%20K02412%20K02417%20K02419%20K02420%20K02421%20K02454%20K02456%20K02458%20K02507%20K02651%20K02653%20K02654%20K02662%20K02664%20K02666%20K02669%20K02670%20K02679%20K02680%20K02682%20K03072%20K03073%20K03074%20K03076%20K03106%20K03110%20K03116%20K03117%20K03118%20…	http://www.genome.jp/kegg-bin/search_pathway_object?org_name=ko&amp;unclassified=%20K01493%20K02237%20K02238%20K02400%20K02401%20K02409%20K02412%20K02417%20K02419%20K02420%20K02421%20K02454%20K02456%20K02458%20K02507%20K02651%20K02653%20K02654%20K02662%20K02664%20K02666%20K02669%20K02670%20K02679%20K02680%20K02682%20K03072%20K03073%20K03074%20K03076%20K03106%20K03110%20K03116%20K03117%20K03118%20…	K01493	K02237	K02238	K02400	K02401	K02409	K02412	K02417	K02419	K02420	K02421	K02454	K02456	K02458	K02507	K02651	K02653	K02654	K02662	K02664	K02666	K02669	K02670	K02679	K02680	K02682	K03072	K03073	K03074
19	ko00052	0.0081973	0.00805798	Metabolism	Carbohydrate Metabolism	Galactose metabolism	0	0.0081973	0.00805798	1.01729	0.983004	1.01729	-1.01729	267	1	57	45	12	http://www.genome.jp/kegg-bin/search_pathway_object?org_name=ko&amp;unclassified=%20K00844%20K00850%20K00963%20K01182,ko:K01187%20K01187%20K01193%20K01220%20K01784%20K02787,ko:K02788%20K07406%20K07407%20K12308%20%20%20%20%20%20%20%20%20%20%20%20%20%20%20%20%20%20%20%20%20%20%20%20%20%20%20%20%20%20%20%20%20%20%20%20%20%20%20%20%20%20%20%20%20%20%20%20%20%20%20%20%20%20%20%20%20%20%20%20%20%20%20%…	http://www.genome.jp/kegg-bin/search_pathway_object?org_name=ko&amp;unclassified=%20K00844%20K00850%20K00963%20K01182,ko:K01187%20K01187%20K01193%20K01220%20K01784%20K02787,ko:K02788%20K07406%20K07407%20K12308%20%20%20%20%20%20%20%20%20%20%20%20%20%20%20%20%20%20%20%20%20%20%20%20%20%20%20%20%20%20%20%20%20%20%20%20%20%20%20%20%20%20%20%20%20%20%20%20%20%20%20%20%20%20%20%20%20%20%20%20%20%20%20%…	K00844	K00850	K00963	K01182,ko:K01187	K01187	K01193	K01220	K01784	K02787,ko:K02788	K07406	K07407	K12308
33	ko00020	0.00806687	0.00797893	Metabolism	Carbohydrate Metabolism	Citrate cycle (TCA cycle)	0	0.00806687	0.00797893	1.01102	0.989099	1.01102	-1.01102	266	1	53	47	20	http://www.genome.jp/kegg-bin/search_pathway_object?org_name=ko&amp;unclassified=%20K00030%20K00169%20K00170%20K00172%20K00177%20K00239%20K00247%20K00382%20K00658%20K01596%20K01644%20K01646%20K01647%20K01677%20K01678%20K01679%20K01681%20K01902%20K01903%20K01958%20%20%20%20%20%20%20%20%20%20%20%20%20%20%20%20%20%20%20%20%20%20%20%20%20%20%20%20%20%20%20%20%20%20%20%20%20%20%20%20%20%20%20%20%20%20…	http://www.genome.jp/kegg-bin/search_pathway_object?org_name=ko&amp;unclassified=%20K00030%20K00169%20K00170%20K00172%20K00177%20K00239%20K00247%20K00382%20K00658%20K01596%20K01644%20K01646%20K01647%20K01677%20K01678%20K01679%20K01681%20K01902%20K01903%20K01958%20%20%20%20%20%20%20%20%20%20%20%20%20%20%20%20%20%20%20%20%20%20%20%20%20%20%20%20%20%20%20%20%20%20%20%20%20%20%20%20%20%20%20%20%20%20…	K00030	K00169	K00170	K00172	K00177	K00239	K00247	K00382	K00658	K01596	K01644	K01646	K01647	K01677	K01678	K01679	K01681	K01902	K01903	K01958
13	ko00300	0.00747133	0.0081687	Metabolism	Amino Acid Metabolism	Lysine biosynthesis	1	0.00747133	0.00816871	0.914628	1.09334	-1.09334	1.09334	265	1	40	36	20	http://www.genome.jp/kegg-bin/search_pathway_object?org_name=ko&amp;unclassified=%20K00003%20K00133%20K00145%20K00215%20K00290%20K00674%20K00821%20K00928%20K00930%20K01439%20K01586%20K01714%20K01775,ko:K01929%20K01778%20K01928%20K01929%20K03340%20K05822%20K05824%20K10206%20%20%20%20%20%20%20%20%20%20%20%20%20%20%20%20%20%20%20%20%20%20%20%20%20%20%20%20%20%20%20%20%20%20%20%20%20%20%20%20%20%20%2…	http://www.genome.jp/kegg-bin/search_pathway_object?org_name=ko&amp;unclassified=%20K00003%20K00133%20K00145%20K00215%20K00290%20K00674%20K00821%20K00928%20K00930%20K01439%20K01586%20K01714%20K01775,ko:K01929%20K01778%20K01928%20K01929%20K03340%20K05822%2	K00003	K00133	K00145	K00215	K00290	K00674	K00821	K00928	K00930	K01439	K01586	K01714	K01775,ko:K01929	K01778	K01928	K01929	K03340	K05822	K05824	K10206
54	ko00550	0.00673028	0.00792336	Metabolism	Glycan Biosynthesis and Metabolism	Peptidoglycan biosynthesis	0	0.00673028	0.00792337	0.849422	1.17727	-1.17727	1.17727	264	1	37	40	20	http://www.genome.jp/kegg-bin/search_pathway_object?org_name=ko&amp;unclassified=%20K00075%20K00790%20K01000%20K01775,ko:K01929%20K01921%20K01924%20K01925%20K01928%20K01929%20K02563%20K03587%20K03980%20K05362%20K05364%20K05367%20K05515%20K06153%20K07258%20K07259%20K12554%20%20%20%20%20%20%20%20%20%20%20%20%20%20%20%20%20%20%20%20%20%20%20%20%20%20%20%20%20%20%20%20%20%20%20%20%20%20%20%20%20%20%2…	http://www.genome.jp/kegg-bin/search_pathway_object?org_name=ko&amp;unclassified=%20K00075%20K00790%20K01000%20K01775,ko:K01929%20K01921%20K01924%20K01925%20K01928%20K01929%20K02563%20K03587%20K03980%20K05362%20K05364%20K05367%20K05515%20K06153%20K07258%20K07259%20K12554%20%20%20%20%20%20%20%20%20%20%20%20%20%20%20%20%20%20%20%20%20%20%20%20%20%20%20%20%20%20%20%20%20%20%20%20%20%20%20%20%20%20%2…	K00075	K00790	K01000	K01775,ko:K01929	K01921	K01924	K01925	K01928	K01929	K02563	K03587	K03980	K05362	K05364	K05367	K05515	K06153	K07258	K07259	K12554
14	ko00650	0.00710147	0.00741209	Metabolism	Carbohydrate Metabolism	Butanoate metabolism	0	0.00710147	0.00741209	0.958093	1.04374	-1.04374	1.04374	263	1	69	74	31	http://www.genome.jp/kegg-bin/search_pathway_object?org_name=ko&amp;unclassified=%20K00023%20K00074%20K00100%20K00100,ko:K01726%20K00132%20K00135%20K00169%20K00170%20K00172%20K00239%20K00247%20K00248%20K00626%20K00634%20K00656%20K00823%20K00929%20K01029%20K01034%20K01035%20K01039%20K01040%20K01615%20K01640%20K01652%20K01653%20K01715%20K01726%20K07246%20K07250%20K14534%20%20%20%20%20%20%20%20%20%2…	http://www.genome.jp/kegg-bin/search_pathway_object?org_name=ko&amp;unclassified=%20K00023%20K00074%20K00100%20K00100,ko:K01726%20K00132%20K00135%20K00169%20K00170%20K00172%20K00239%20K00247%20K00248%20K00626%20K00634%20K00656%20K00823%20K00929%20K01029%20K01034%20K01035%20K01039%20K01040%20K01615%20K01640%20K01652%20K01653%20K01715%20K01726%20K07246%20K07250%20K14534%20%20%20%20%20%20%20%20%20%2…	K00023	K00074	K00100	K00100,ko:K01726	K00132	K00135	K00169	K00170	K00172	K00239	K00247	K00248	K00626	K00634	K00656	K00823	K00929	K01029	K01034	K01035	K01039	K01040	K01615	K01640	K01652	K01653	K01715	K01726	K07246
16	ko00051	0.00775333	0.00649824	Metabolism	Carbohydrate Metabolism	Fructose and mannose metabolism	0	0.00775333	0.00649824	1.19314	0.838122	1.19314	-1.19314	262	1	67	76	24	http://www.genome.jp/kegg-bin/search_pathway_object?org_name=ko&amp;unclassified=%20K00008%20K00066%20K00100%20K00844%20K00847%20K00848,ko:K01813%20K00850%20K00882%20K00971,ko:K01809%20K01103%20K01623%20K01818%20K02446%20K02768,ko:K02769,ko:K02770%20K02769,ko:K02770%20K02782,ko:K02783%20K02783%20K02795%20K02798%20K02798,ko:K02799,ko:K02800%20K03841%20K04041%20K12660%20K12661%20%20%20%20%20%20%20%…	http://www.genome.jp/kegg-bin/search_pathway_object?org_name=ko&amp;unclassified=%20K00008%20K00066%20K00100%20K00844%20K00847%20K00848,ko:K01813%20K00850%20K00882%20K00971,ko:K01809%20K01103%20K01623%20K01818%20K02446%20K02768,ko:K02769,ko:K02770%20K02769,ko:K02770%20K02782,ko:K02783%20K02783%20K02795%20K02798%20K02798,ko:K02799,ko:K02800%20K03841%20K04041%20K12660%20K12661%20%20%20%20%20%20%20%…	K00008	K00066	K00100	K00844	K00847	K00848,ko:K01813	K00850	K00882	K00971,ko:K01809	K01103	K01623	K01818	K02446	K02768,ko:K02769,ko:K02770	K02769,ko:K02770	K02782,ko:K02783	K02783	K02795	K02798	K02798,ko:K02799,ko:K02800	K03841	K04041	K12660	K12661
235	ko03070	0.00743503	0.00641566	Environmental Information Processing	Membrane Transport	Bacterial secretion system	0	0.00743503	0.00641566	1.15889	0.862896	1.15889	-1.15889	261	1	74	75	30	http://www.genome.jp/kegg-bin/search_pathway_object?org_name=ko&amp;unclassified=%20K02454%20K02456%20K02458%20K03072%20K03073%20K03074%20K03076%20K03106%20K03110%20K03116%20K03117%20K03118%20K03196%20K03199%20K03200%20K03205%20K03210%20K03217%20K03219%20K03222%20K03224%20K03226%20K03227%20K03228%20K03229%20K03230%20K11004%20K11907%20K11912%20K12340%20%20%20%20%20%20%20%20%20%20%20%20%20%20%20%20…	http://www.genome.jp/kegg-bin/search_pathway_object?org_name=ko&amp;unclassified=%20K02454%20K02456%20K02458%20K03072%20K03073%20K03074%20K03076%20K03106%20K03110%20K03116%20K03117%20K03118%20K03196%20K03199%20K03200%20K03205%20K03210%20K03217%20K03219%20K03222%20K03224%20K03226%20K03227%20K03228%20K03229%20K03230%20K11004%20K11907%20K11912%20K12340%20%20%20%20%20%20%20%20%20%20%20%20%20%20%20%20…	K02454	K02456	K02458	K03072	K03073	K03074	K03076	K03106	K03110	K03116	K03117	K03118	K03196	K03199	K03200	K03205	K03210	K03217	K03219	K03222	K03224	K03226	K03227	K03228	K03229	K03230	K11004	K11907	K11912
25	ko00400	0.00493181	0.00847781	Metabolism	Amino Acid Metabolism	Phenylalanine, tyrosine and tryptophan biosynthesis	1	0.00493181	0.00847782	0.581731	1.71901	-1.71901	1.71901	260	1	62	55	28	http://www.genome.jp/kegg-bin/search_pathway_object?org_name=ko&amp;unclassified=%20K00014%20K00766%20K00800%20K00817%20K00832%20K00891%20K01609%20K01626%20K01657%20K01658%20K01695%20K01696%20K01735%20K01736%20K01814,ko:K01817%20K01817%20K03785%20K03856%20K04517%20K06209%20K11358%20K11646%20K13497%20K13498%20K13503%20K13829%20K13853%20K14170%20%20%20%20%20%20%20%20%20%20%20%20%20%20%20%20%20%20%2…	http://www.genome.jp/kegg-bin/search_pathway_object?org_name=ko&amp;unclassified=%20K00014%20K00766%20K00800%20K00817%20K00832%20K00891%20K01609%20K01626%20K01657%20K01658%20K01695%20K01696%20K01735%20K01736%20K01814,ko:K01817%20K01817%20K03785%20K03856%2	K00014	K00766	K00800	K00817	K00832	K00891	K01609	K01626	K01657	K01658	K01695	K01696	K01735	K01736	K01814,ko:K01817	K01817	K03785	K03856	K04517	K06209	K11358	K11646	K13497	K13498	K13503	K13829	K13853	K14170
22	ko00500	0.0112788	0.0127383	Metabolism	Carbohydrate Metabolism	Starch and sucrose metabolism	0	0.0112788	0.0127383	0.885428	1.1294	-1.1294	1.1294	259	1	80	68	23	http://www.genome.jp/kegg-bin/search_pathway_object?org_name=ko&amp;unclassified=%20K00012%20K00690%20K00697%20K00705%20K00844%20K00847%20K00963%20K01182%20K01182,ko:K01187%20K01184%20K01187%20K01188%20K01193%20K01195%20K01210%20K01226%20K01810%20K02777%20K02808,ko:K02809,ko:K02810%20K02809,ko:K02810%20K05343%20K05349%20K08679%20%20%20%20%20%20%20%20%20%20%20%20%20%20%20%20%20%20%20%20%20%20%20%2…	http://www.genome.jp/kegg-bin/search_pathway_object?org_name=ko&amp;unclassified=%20K00012%20K00690%20K00697%20K00705%20K00844%20K00847%20K00963%20K01182%20K01182,ko:K01187%20K01184%20K01187%20K01188%20K01193%20K01195%20K01210%20K01226%20K01810%20K02777%20K02808,ko:K02809,ko:K02810%20K02809,ko:K02810%20K05343%20K05349%20K08679%20%20%20%20%20%20%20%20%20%20%20%20%20%20%20%20%20%20%20%20%20%20%20%2…	K00012	K00690	K00697	K00705	K00844	K00847	K00963	K01182	K01182,ko:K01187	K01184	K01187	K01188	K01193	K01195	K01210	K01226	K01810	K02777	K02808,ko:K02809,ko:K02810	K02809,ko:K02810	K05343	K05349	K08679
36	ko02020	0.0113317	0.0121728	Environmental Information Processing	Signal Transduction	Two-component system	0	0.0113317	0.0121728	0.930906	1.07422	-1.07422	1.07422	258	1	322	315	70	http://www.genome.jp/kegg-bin/search_pathway_object?org_name=ko&amp;unclassified=%20K00066%20K00247%20K00370%20K00371%20K00575%20K00626%20K00990%20K01034%20K01035%20K01077%20K01467%20K01546%20K01547%20K01548%20K01644%20K01646%20K01910%20K02040%20K02313%20K02403%20K02405%20K02406%20K02489%20K02556%20K02584%20K03092%20K03406%20K03407%20K03412%20K03413%20K03415%20K03563%20K04751%20K07636%20K07642%20…	http://www.genome.jp/kegg-bin/search_pathway_object?org_name=ko&amp;unclassified=%20K00066%20K00247%20K00370%20K00371%20K00575%20K00626%20K00990%20K01034%20K01035%20K01077%20K01467%20K01546%20K01547%20K01548%20K01644%20K01646%20K01910%20K02040%20K02313%20K02403%20K02405%20K02406%20K02489%20K02556%20K02584%20K03092%20K03406%20K03407%20K03412%20K03413%20K03415%20K03563%20K04751%20K07636%20K07642%20…	K00066	K00247	K00370	K00371	K00575	K00626	K00990	K01034	K01035	K01077	K01467	K01546	K01547	K01548	K01644	K01646	K01910	K02040	K02313	K02403	K02405	K02406	K02489	K02556	K02584	K03092	K03406	K03407	K03412
129	ko03009	0.0112142	0.0116466	Genetic Information Processing	Translation	Ribosome Biogenesis	1	0.0112142	0.0116466	0.962876	1.03856	-1.03856	1.03856	257	1	327	76	39	http://www.genome.jp/kegg-bin/search_pathway_object?org_name=ko&amp;unclassified=%20K01139%20K02427%20K02528%20K02600%20K02834%20K02860%20K03215%20K03500%20K03501%20K03625%20K03685%20K03789%20K03979%20K05591%20K05592%20K06178%20K06179%20K06180%20K06182%20K06183%20K06204%20K06949%20K06968%20K06969%20K07042%20K07566%20K07574%20K08300%20K08301%20K08316%20K09136%20K09710%20K09748%20K09761%20K09889%20…	http://www.genome.jp/kegg-bin/search_pathway_object?org_name=ko&amp;unclassified=%20K01139%20K02427%20K02528%20K02600%20K02834%20K02860%20K03215%20K03500%20K03501%20K03625%20K03685%20K03789%20K03979%20K05591%20K05592%20K06178%20K06179%20K06180%20K06182%20	K01139	K02427	K02528	K02600	K02834	K02860	K03215	K03500	K03501	K03625	K03685	K03789	K03979	K05591	K05592	K06178	K06179	K06180	K06182	K06183	K06204	K06949	K06968	K06969	K07042	K07566	K07574	K08300	K08301
178	ko03430	0.0110916	0.0115775	Genetic Information Processing	Replication and Repair	Mismatch repair	0	0.0110916	0.0115775	0.958033	1.04381	-1.04381	1.04381	256	1	45	28	14	http://www.genome.jp/kegg-bin/search_pathway_object?org_name=ko&amp;unclassified=%20K01972%20K02337%20K02338%20K02340%20K02341%20K02342%20K02343%20K03111%20K03572%20K03601%20K03602%20K03657%20K07456%20K07462%20%20%20%20%20%20%20%20%20%20%20%20%20%20%20%20%20%20%20%20%20%20%20%20%20%20%20%20%20%20%20%20%20%20%20%20%20%20%20%20%20%20%20%20%20%20%20%20%20%20%20%20%20%20%20%20%20%20%20%20%20%20%20%20…	http://www.genome.jp/kegg-bin/search_pathway_object?org_name=ko&amp;unclassified=%20K01972%20K02337%20K02338%20K02340%20K02341%20K02342%20K02343%20K03111%20K03572%20K03601%20K03602%20K03657%20K07456%20K07462%20%20%20%20%20%20%20%20%20%20%20%20%20%20%20%20%20%20%20%20%20%20%20%20%20%20%20%20%20%20%20%20%20%20%20%20%20%20%20%20%20%20%20%20%20%20%20%20%20%20%20%20%20%20%20%20%20%20%20%20%20%20%20%20…	K01972	K02337	K02338	K02340	K02341	K02342	K02343	K03111	K03572	K03601	K03602	K03657	K07456	K07462
12	ko00270	0.0102389	0.0121866	Metabolism	Amino Acid Metabolism	Cysteine and methionine metabolism	1	0.0102389	0.0121866	0.840181	1.19022	-1.19022	1.19022	255	1	66	59	30	http://www.genome.jp/kegg-bin/search_pathway_object?org_name=ko&amp;unclassified=%20K00003%20K00133%20K00547%20K00548%20K00549%20K00558%20K00640%20K00641%20K00651%20K00772%20K00797%20K00832%20K00899%20K00928%20K01251%20K01611%20K01697%20K01738%20K01739%20K01740%20K01752%20K01760%20K01761%20K05396%20K08963%20K08967%20K08969%20K09758%20K11358%20K14155%20%20%20%20%20%20%20%20%20%20%20%20%20%20%20%20…	http://www.genome.jp/kegg-bin/search_pathway_object?org_name=ko&amp;unclassified=%20K00003%20K00133%20K00547%20K00548%20K00549%20K00558%20K00640%20K00641%20K00651%20K00772%20K00797%20K00832%20K00899%20K00928%20K01251%20K01611%20K01697%20K01738%20K01739%20	K00003	K00133	K00547	K00548	K00549	K00558	K00640	K00641	K00651	K00772	K00797	K00832	K00899	K00928	K01251	K01611	K01697	K01738	K01739	K01740	K01752	K01760	K01761	K05396	K08963	K08967	K08969	K09758	K11358
181	ko03440	0.0120348	0.012573	Genetic Information Processing	Replication and Repair	Homologous recombination	0	0.0120348	0.012573	0.957192	1.04472	-1.04472	1.04472	254	1	59	30	15	http://www.genome.jp/kegg-bin/search_pathway_object?org_name=ko&amp;unclassified=%20K01159%20K02335%20K02337%20K02338%20K02340%20K02341%20K02342%20K02343%20K03111%20K03550%20K03584%20K03629%20K03655%20K04066%20K07462%20%20%20%20%20%20%20%20%20%20%20%20%20%20%20%20%20%20%20%20%20%20%20%20%20%20%20%20%20%20%20%20%20%20%20%20%20%20%20%20%20%20%20%20%20%20%20%20%20%20%20%20%20%20%20%20%20%20%20%20%20…	http://www.genome.jp/kegg-bin/search_pathway_object?org_name=ko&amp;unclassified=%20K01159%20K02335%20K02337%20K02338%20K02340%20K02341%20K02342%20K02343%20K03111%20K03550%20K03584%20K03629%20K03655%20K04066%20K07462%20%20%20%20%20%20%20%20%20%20%20%20%20%20%20%20%20%20%20%20%20%20%20%20%20%20%20%20%20%20%20%20%20%20%20%20%20%20%20%20%20%20%20%20%20%20%20%20%20%20%20%20%20%20%20%20%20%20%20%20%20…	K01159	K02335	K02337	K02338	K02340	K02341	K02342	K02343	K03111	K03550	K03584	K03629	K03655	K04066	K07462
42	ko00290	0.0123024	0.012272	Metabolism	Amino Acid Metabolism	Valine, leucine and isoleucine biosynthesis	0	0.0123024	0.012272	1.00248	0.997524	1.00248	-1.00248	253	1	22	21	10	http://www.genome.jp/kegg-bin/search_pathway_object?org_name=ko&amp;unclassified=%20K00052%20K00053%20K00263%20K00826%20K01649%20K01652%20K01653%20K01703%20K01704%20K01754%20%20%20%20%20%20%20%20%20%20%20%20%20%20%20%20%20%20%20%20%20%20%20%20%20%20%20%20%20%20%20%20%20%20%20%20%20%20%20%20%20%20%20%20%20%20%20%20%20%20%20%20%20%20%20%20%20%20%20%20%20%20%20%20%20%20%20%20%20%20%20%20%20%20%20%20…	http://www.genome.jp/kegg-bin/search_pathway_object?org_name=ko&amp;unclassified=%20K00052%20K00053%20K00263%20K00826%20K01649%20K01652%20K01653%20K01703%20K01704%20K01754%20%20%20%20%20%20%20%20%20%20%20%20%20%20%20%20%20%20%20%20%20%20%20%20%20%20%20%20%20%20%20%20%20%20%20%20%20%20%20%20%20%20%20%20%20%20%20%20%20%20%20%20%20%20%20%20%20%20%20%20%20%20%20%20%20%20%20%20%20%20%20%20%20%20%20%20…	K00052	K00053	K00263	K00826	K01649	K01652	K01653	K01703	K01704	K01754
188	ko03110	0.0144241	0.0118544	Genetic Information Processing	Folding, Sorting and Degradation	Chaperones and folding catalysts	0	0.0144241	0.0118544	1.21677	0.821846	1.21677	-1.21677	252	1	227	72	17	http://www.genome.jp/kegg-bin/search_pathway_object?org_name=ko&amp;unclassified=%20K02108%20K03667%20K03671%20K03687%20K03696%20K03767%20K03768%20K03775%20K04043%20K04044%20K04045%20K04078%20K04083%20K05838%20K12373%20K12733%20K13993%20%20%20%20%20%20%20%20%20%20%20%20%20%20%20%20%20%20%20%20%20%20%20%20%20%20%20%20%20%20%20%20%20%20%20%20%20%20%20%20%20%20%20%20%20%20%20%20%20%20%20%20%20%20%20…	http://www.genome.jp/kegg-bin/search_pathway_object?org_name=ko&amp;unclassified=%20K02108%20K03667%20K03671%20K03687%20K03696%20K03767%20K03768%20K03775%20K04043%20K04044%20K04045%20K04078%20K04083%20K05838%20K12373%20K12733%20K13993%20%20%20%20%20%20%20%20%20%20%20%20%20%20%20%20%20%20%20%20%20%20%20%20%20%20%20%20%20%20%20%20%20%20%20%20%20%20%20%20%20%20%20%20%20%20%20%20%20%20%20%20%20%20%20…	K02108	K03667	K03671	K03687	K03696	K03767	K03768	K03775	K04043	K04044	K04045	K04078	K04083	K05838	K12373	K12733	K13993
1	ko00010	0.0133934	0.0113419	Metabolism	Carbohydrate Metabolism	Glycolysis / Gluconeogenesis	0	0.0133934	0.0113419	1.18088	0.846827	1.18088	-1.18088	251	1	80	68	26	http://www.genome.jp/kegg-bin/search_pathway_object?org_name=ko&amp;unclassified=%20K00001%20K00002%20K00128%20K00150%20K00169%20K00170%20K00172%20K00382%20K00844%20K00850%20K00873%20K00886%20K00927%20K01222%20K01223%20K01596%20K01623%20K01689%20K01810%20K02446%20K02777%20K02778,ko:K02779%20K03738%20K03841%20K04041%20K13954%20%20%20%20%20%20%20%20%20%20%20%20%20%20%20%20%20%20%20%20%20%20%20%20%2…	http://www.genome.jp/kegg-bin/search_pathway_object?org_name=ko&amp;unclassified=%20K00001%20K00002%20K00128%20K00150%20K00169%20K00170%20K00172%20K00382%20K00844%20K00850%20K00873%20K00886%20K00927%20K01222%20K01223%20K01596%20K01623%20K01689%20K01810%20K02446%20K02777%20K02778,ko:K02779%20K03738%20K03841%20K04041%20K13954%20%20%20%20%20%20%20%20%20%20%20%20%20%20%20%20%20%20%20%20%20%20%20%20%2…	K00001	K00002	K00128	K00150	K00169	K00170	K00172	K00382	K00844	K00850	K00873	K00886	K00927	K01222	K01223	K01596	K01623	K01689	K01810	K02446	K02777	K02778,ko:K02779	K03738	K03841	K04041	K13954
128	ko03036	0.013502	0.012768	Genetic Information Processing	Replication and Repair	Chromosome	0	0.013502	0.012768	1.05749	0.945637	1.05749	-1.05749	250	1	535	71	27	http://www.genome.jp/kegg-bin/search_pathway_object?org_name=ko&amp;unclassified=%20K00558%20K01448%20K02313%20K03466%20K03496%20K03497%20K03501%20K03570%20K03571%20K03585%20K03586%20K03587%20K03589%20K03591%20K03608%20K03610%20K03666%20K03719%20K04074%20K04094%20K05788%20K05837%20K05896%20K09772%20K09811%20K09812%20K09888%20%20%20%20%20%20%20%20%20%20%20%20%20%20%20%20%20%20%20%20%20%20%20%20%20…	http://www.genome.jp/kegg-bin/search_pathway_object?org_name=ko&amp;unclassified=%20K00558%20K01448%20K02313%20K03466%20K03496%20K03497%20K03501%20K03570%20K03571%20K03585%20K03586%20K03587%20K03589%20K03591%20K03608%20K03610%20K03666%20K03719%20K04074%20K04094%20K05788%20K05837%20K05896%20K09772%20K09811%20K09812%20K09888%20%20%20%20%20%20%20%20%20%20%20%20%20%20%20%20%20%20%20%20%20%20%20%20%20…	K00558	K01448	K02313	K03466	K03496	K03497	K03501	K03570	K03571	K03585	K03586	K03587	K03589	K03591	K03608	K03610	K03666	K03719	K04074	K04094	K05788	K05837	K05896	K09772	K09811	K09812	K09888
23	ko00520	0.0152066	0.0143006	Metabolism	Carbohydrate Metabolism	Amino sugar and nucleotide sugar metabolism	0	0.0152066	0.0143006	1.06335	0.940421	1.06335	-1.06335	249	1	107	101	32	http://www.genome.jp/kegg-bin/search_pathway_object?org_name=ko&amp;unclassified=%20K00012%20K00066%20K00075%20K00790%20K00820%20K00844%20K00847%20K00886%20K00963%20K00971,ko:K01809%20K00972%20K01183%20K01207%20K01639%20K01784%20K01787%20K01791%20K01810%20K02472%20K02474%20K02763,ko:K02764,ko:K02765%20K02777%20K02778,ko:K02779%20K02795%20K02803,ko:K02804%20K04042%20K07106%20K08679%20K11528%20K123…	http://www.genome.jp/kegg-bin/search_pathway_object?org_name=ko&amp;unclassified=%20K00012%20K00066%20K00075%20K00790%20K00820%20K00844%20K00847%20K00886%20K00963%20K00971,ko:K01809%20K00972%20K01183%20K01207%20K01639%20K01784%20K01787%20K01791%20K01810%20K02472%20K02474%20K02763,ko:K02764,ko:K02765%20K02777%20K02778,ko:K02779%20K02795%20K02803,ko:K02804%20K04042%20K07106%20K08679%20K11528%20K123…	K00012	K00066	K00075	K00790	K00820	K00844	K00847	K00886	K00963	K00971,ko:K01809	K00972	K01183	K01207	K01639	K01784	K01787	K01791	K01810	K02472	K02474	K02763,ko:K02764,ko:K02765	K02777	K02778,ko:K02779	K02795	K02803,ko:K02804	K04042	K07106	K08679	K11528
20	ko00620	0.0152642	0.012869	Metabolism	Carbohydrate Metabolism	Pyruvate metabolism	1	0.0152642	0.012869	1.18612	0.843084	1.18612	-1.18612	248	1	73	67	31	http://www.genome.jp/kegg-bin/search_pathway_object?org_name=ko&amp;unclassified=%20K00028%20K00128%20K00132%20K00169%20K00170%20K00172%20K00382%20K00625%20K00626%20K00656%20K00873%20K00925%20K01006%20K01007%20K01026%20K01067%20K01069%20K01512%20K01573%20K01595%20K01596%20K01649%20K01734%20K01759%20K01958%20K01962%20K01962,ko:K01963%20K01963%20K04020%20K07248%20K13788%20%20%20%20%20%20%20%20%20%2…	http://www.genome.jp/kegg-bin/search_pathway_object?org_name=ko&amp;unclassified=%20K00028%20K00128%20K00132%20K00169%20K00170%20K00172%20K00382%20K00625%20K00626%20K00656%20K00873%20K00925%20K01006%20K01007%20K01026%20K01067%20K01069%20K01512%20K01573%20	K00028	K00128	K00132	K00169	K00170	K00172	K00382	K00625	K00626	K00656	K00873	K00925	K01006	K01007	K01026	K01067	K01069	K01512	K01573	K01595	K01596	K01649	K01734	K01759	K01958	K01962	K01962,ko:K01963	K01963	K04020
70	ko00330	0.0131363	0.0145539	Metabolism	Amino Acid Metabolism	Arginine and proline metabolism	1	0.0131363	0.0145539	0.902594	1.10792	-1.10792	1.10792	247	1	128	109	47	http://www.genome.jp/kegg-bin/search_pathway_object?org_name=ko&amp;unclassified=%20K00128%20K00145%20K00147%20K00260%20K00261%20K00262%20K00286%20K00294%20K00611%20K00619%20K00797%20K00818%20K00819%20K00821%20K00930%20K00931%20K00934%20K01259%20K01270%20K01428%20K01429%20K01430%20K01470%20K01476%20K01476,ko:K01581%20K01480%20K01485%20K01573%20K01581%20K01583%20K01584%20K01611%20K01625%20K01750%2…	http://www.genome.jp/kegg-bin/search_pathway_object?org_name=ko&amp;unclassified=%20K00128%20K00145%20K00147%20K00260%20K00261%20K00262%20K00286%20K00294%20K00611%20K00619%20K00797%20K00818%20K00819%20K00821%20K00930%20K00931%20K00934%20K01259%20K01270%20	K00128	K00145	K00147	K00260	K00261	K00262	K00286	K00294	K00611	K00619	K00797	K00818	K00819	K00821	K00930	K00931	K00934	K01259	K01270	K01428	K01429	K01430	K01470	K01476	K01476,ko:K01581	K01480	K01485	K01573	K01581
75	ko00250	0.0190645	0.0187689	Metabolism	Amino Acid Metabolism	Alanine, aspartate and glutamate metabolism	1	0.0190645	0.0187689	1.01575	0.984493	1.01575	-1.01575	246	1	55	43	25	http://www.genome.jp/kegg-bin/search_pathway_object?org_name=ko&amp;unclassified=%20K00135%20K00260%20K00261%20K00262%20K00265%20K00266%20K00278%20K00294%20K00609%20K00610%20K00820%20K00823%20K00830%20K01424%20K01744%20K01755%20K01779%20K01939%20K01940%20K01956%20K07250%20K09758%20K11358%20K13821%20K14681%20%20%20%20%20%20%20%20%20%20%20%20%20%20%20%20%20%20%20%20%20%20%20%20%20%20%20%20%20%20%20…	http://www.genome.jp/kegg-bin/search_pathway_object?org_name=ko&amp;unclassified=%20K00135%20K00260%20K00261%20K00262%20K00265%20K00266%20K00278%20K00294%20K00609%20K00610%20K00820%20K00823%20K00830%20K01424%20K01744%20K01755%20K01779%20K01939%20K01940%20	K00135	K00260	K00261	K00262	K00265	K00266	K00278	K00294	K00609	K00610	K00820	K00823	K00830	K01424	K01744	K01755	K01779	K01939	K01940	K01956	K07250	K09758	K11358	K13821	K14681
127	ko03032	0.0198972	0.0176349	Genetic Information Processing	Replication and Repair	DNA replication proteins	0	0.0198972	0.0176349	1.12828	0.886302	1.12828	-1.12828	245	1	164	59	24	http://www.genome.jp/kegg-bin/search_pathway_object?org_name=ko&amp;unclassified=%20K00558%20K01972%20K02313%20K02314%20K02315%20K02316%20K02322%20K02335%20K02337%20K02338%20K02340%20K02341%20K02342%20K02343%20K03111%20K03168%20K03169%20K03170%20K03469%20K03470%20K03471%20K04800%20K04801%20K05788%20%20%20%20%20%20%20%20%20%20%20%20%20%20%20%20%20%20%20%20%20%20%20%20%20%20%20%20%20%20%20%20%20%20…	http://www.genome.jp/kegg-bin/search_pathway_object?org_name=ko&amp;unclassified=%20K00558%20K01972%20K02313%20K02314%20K02315%20K02316%20K02322%20K02335%20K02337%20K02338%20K02340%20K02341%20K02342%20K02343%20K03111%20K03168%20K03169%20K03170%20K03469%20K03470%20K03471%20K04800%20K04801%20K05788%20%20%20%20%20%20%20%20%20%20%20%20%20%20%20%20%20%20%20%20%20%20%20%20%20%20%20%20%20%20%20%20%20%20…	K00558	K01972	K02313	K02314	K02315	K02316	K02322	K02335	K02337	K02338	K02340	K02341	K02342	K02343	K03111	K03168	K03169	K03170	K03469	K03470	K03471	K04800	K04801	K05788
144	ko01002	0.0181875	0.0201289	Metabolism	Enzyme Families	Peptidases	0	0.0181875	0.0201289	0.903549	1.10675	-1.10675	1.10675	244	1	623	182	57	http://www.genome.jp/kegg-bin/search_pathway_object?org_name=ko&amp;unclassified=%20K00681%20K00820%20K01255%20K01256%20K01258%20K01259%20K01266%20K01270%20K01273%20K01278%20K01295%20K01297%20K01299%20K01303%20K01304%20K01305%20K01308%20K01354%20K01356%20K01358%20K01372%20K01409%20K01419%20K01434%20K01436%20K01951%20K02654%20K03100%20K03101%20K03503%20K03568%20K03797%20K03799%20K04772%20K05520%20…	http://www.genome.jp/kegg-bin/search_pathway_object?org_name=ko&amp;unclassified=%20K00681%20K00820%20K01255%20K01256%20K01258%20K01259%20K01266%20K01270%20K01273%20K01278%20K01295%20K01297%20K01299%20K01303%20K01304%20K01305%20K01308%20K01354%20K01356%20K01358%20K01372%20K01409%20K01419%20K01434%20K01436%20K01951%20K02654%20K03100%20K03101%20K03503%20K03568%20K03797%20K03799%20K04772%20K05520%20…	K00681	K00820	K01255	K01256	K01258	K01259	K01266	K01270	K01273	K01278	K01295	K01297	K01299	K01303	K01304	K01305	K01308	K01354	K01356	K01358	K01372	K01409	K01419	K01434	K01436	K01951	K02654	K03100	K03101
239	ko03011	0.0195499	0.0156387	Genetic Information Processing	Translation	Ribosome	0	0.0195499	0.0156387	1.2501	0.799937	1.2501	-1.2501	243	1	145	91	30	http://www.genome.jp/kegg-bin/search_pathway_object?org_name=ko&amp;unclassified=%20K02864%20K02871%20K02874%20K02876%20K02878%20K02884%20K02888%20K02892%20K02895%20K02897%20K02902%20K02911%20K02913%20K02919%20K02933%20K02939%20K02948%20K02950%20K02952%20K02954%20K02956%20K02959%20K02965%20K02968%20K02986%20K02990%20K02992%20K02994%20K02996%20K07590%20%20%20%20%20%20%20%20%20%20%20%20%20%20%20%20…	http://www.genome.jp/kegg-bin/search_pathway_object?org_name=ko&amp;unclassified=%20K02864%20K02871%20K02874%20K02876%20K02878%20K02884%20K02888%20K02892%20K02895%20K02897%20K02902%20K02911%20K02913%20K02919%20K02933%20K02939%20K02948%20K02950%20K02952%20K02954%20K02956%20K02959%20K02965%20K02968%20K02986%20K02990%20K02992%20K02994%20K02996%20K07590%20%20%20%20%20%20%20%20%20%20%20%20%20%20%20%20…	K02864	K02871	K02874	K02876	K02878	K02884	K02888	K02892	K02895	K02897	K02902	K02911	K02913	K02919	K02933	K02939	K02948	K02950	K02952	K02954	K02956	K02959	K02965	K02968	K02986	K02990	K02992	K02994	K02996
238	ko03010	0.0195499	0.0156387	Genetic Information Processing	Translation	Ribosome	0	0.0195499	0.0156387	1.2501	0.799937	1.2501	-1.2501	242	1	144	91	30	http://www.genome.jp/kegg-bin/search_pathway_object?org_name=ko&amp;unclassified=%20K02864%20K02871%20K02874%20K02876%20K02878%20K02884%20K02888%20K02892%20K02895%20K02897%20K02902%20K02911%20K02913%20K02919%20K02933%20K02939%20K02948%20K02950%20K02952%20K02954%20K02956%20K02959%20K02965%20K02968%20K02986%20K02990%20K02992%20K02994%20K02996%20K07590%20%20%20%20%20%20%20%20%20%20%20%20%20%20%20%20…	http://www.genome.jp/kegg-bin/search_pathway_object?org_name=ko&amp;unclassified=%20K02864%20K02871%20K02874%20K02876%20K02878%20K02884%20K02888%20K02892%20K02895%20K02897%20K02902%20K02911%20K02913%20K02919%20K02933%20K02939%20K02948%20K02950%20K02952%20K02954%20K02956%20K02959%20K02965%20K02968%20K02986%20K02990%20K02992%20K02994%20K02996%20K07590%20%20%20%20%20%20%20%20%20%20%20%20%20%20%20%20…	K02864	K02871	K02874	K02876	K02878	K02884	K02888	K02892	K02895	K02897	K02902	K02911	K02913	K02919	K02933	K02939	K02948	K02950	K02952	K02954	K02956	K02959	K02965	K02968	K02986	K02990	K02992	K02994	K02996
226	ko02010	0.0158002	0.0194281	Environmental Information Processing	Membrane Transport	ABC transporters	0	0.0158002	0.0194281	0.813267	1.22961	-1.22961	1.22961	241	1	327	305	94	http://www.genome.jp/kegg-bin/search_pathway_object?org_name=ko&amp;unclassified=%20K01999%20K02000%20K02006%20K02007%20K02008%20K02009%20K02010%20K02012%20K02015%20K02017%20K02018%20K02020%20K02031,ko:K02032%20K02031,ko:K02034%20K02035%20K02040%20K02041%20K02042%20K02044%20K02045%20K02046%20K02047%20K02048%20K02051%20K02059%20K02063%20K02071%20K02072%20K02073%20K02193%20K02194%20K02195%20K02471%…	http://www.genome.jp/kegg-bin/search_pathway_object?org_name=ko&amp;unclassified=%20K01999%20K02000%20K02006%20K02007%20K02008%20K02009%20K02010%20K02012%20K02015%20K02017%20K02018%20K02020%20K02031,ko:K02032%20K02031,ko:K02034%20K02035%20K02040%20K02041%20K02042%20K02044%20K02045%20K02046%20K02047%20K02048%20K02051%20K02059%20K02063%20K02071%20K02072%20K02073%20K02193%20K02194%20K02195%20K02471%…	K01999	K02000	K02006	K02007	K02008	K02009	K02010	K02012	K02015	K02017	K02018	K02020	K02031,ko:K02032	K02031,ko:K02034	K02035	K02040	K02041	K02042	K02044	K02045	K02046	K02047	K02048	K02051	K02059	K02063	K02071	K02072	K02073
50	ko01004	0.0040754	0.00446562	Metabolism	Lipid Metabolism	Lipid biosynthesis proteins	0	0.0040754	0.00446562	0.912617	1.09575	-1.09575	1.09575	240	2	130	83	13	http://www.genome.jp/kegg-bin/search_pathway_object?org_name=ko&amp;unclassified=%20K00645%20K00647%20K00648%20K00655%20K00666%20K01897%20K02371%20K02372%20K08591%20K10804%20K10805%20K10806%20K11533%20%20%20%20%20%20%20%20%20%20%20%20%20%20%20%20%20%20%20%20%20%20%20%20%20%20%20%20%20%20%20%20%20%20%20%20%20%20%20%20%20%20%20%20%20%20%20%20%20%20%20%20%20%20%20%20%20%20%20%20%20%20%20%20%20%20%20…	http://www.genome.jp/kegg-bin/search_pathway_object?org_name=ko&amp;unclassified=%20K00645%20K00647%20K00648%20K00655%20K00666%20K01897%20K02371%20K02372%20K08591%20K10804%20K10805%20K10806%20K11533%20%20%20%20%20%20%20%20%20%20%20%20%20%20%20%20%20%20%20%20%20%20%20%20%20%20%20%20%20%20%20%20%20%20%20%20%20%20%20%20%20%20%20%20%20%20%20%20%20%20%20%20%20%20%20%20%20%20%20%20%20%20%20%20%20%20%20…	K00645	K00647	K00648	K00655	K00666	K01897	K02371	K02372	K08591	K10804	K10805	K10806	K11533
18	ko00521	0.00391475	0.00444361	Metabolism	Biosynthesis of Other Secondary Metabolites	Streptomycin biosynthesis	0	0.00391475	0.00444362	0.880983	1.1351	-1.1351	1.1351	239	2	17	14	7	http://www.genome.jp/kegg-bin/search_pathway_object?org_name=ko&amp;unclassified=%20K00010%20K00067%20K00844%20K00973%20K01092%20K01710%20K01790%20%20%20%20%20%20%20%20%20%20%20%20%20%20%20%20%20%20%20%20%20%20%20%20%20%20%20%20%20%20%20%20%20%20%20%20%20%20%20%20%20%20%20%20%20%20%20%20%20%20%20%20%20%20%20%20%20%20%20%20%20%20%20%20%20%20%20%20%20%20%20%20%20%20%20%20%20%20%20%20%20%20%20%20%20…	http://www.genome.jp/kegg-bin/search_pathway_object?org_name=ko&amp;unclassified=%20K00010%20K00067%20K00844%20K00973%20K01092%20K01710%20K01790%20%20%20%20%20%20%20%20%20%20%20%20%20%20%20%20%20%20%20%20%20%20%20%20%20%20%20%20%20%20%20%20%20%20%20%20%20%20%20%20%20%20%20%20%20%20%20%20%20%20%20%20%20%20%20%20%20%20%20%20%20%20%20%20%20%20%20%20%20%20%20%20%20%20%20%20%20%20%20%20%20%20%20%20%20…	K00010	K00067	K00844	K00973	K01092	K01710	K01790
31	ko00900	0.00396522	0.00429362	Metabolism	Metabolism of Terpenoids and Polyketides	Terpenoid backbone biosynthesis	1	0.00396522	0.00429362	0.923515	1.08282	-1.08282	1.08282	238	2	35	28	16	http://www.genome.jp/kegg-bin/search_pathway_object?org_name=ko&amp;unclassified=%20K00099%20K00626%20K00795%20K00805%20K00806%20K00919%20K00991%20K01770%20K01823%20K02945,ko:K03527%20K03527%20K12503%20K12506%20K13787%20K13789%20K14215%20%20%20%20%20%20%20%20%20%20%20%20%20%20%20%20%20%20%20%20%20%20%20%20%20%20%20%20%20%20%20%20%20%20%20%20%20%20%20%20%20%20%20%20%20%20%20%20%20%20%20%20%20%20%2…	http://www.genome.jp/kegg-bin/search_pathway_object?org_name=ko&amp;unclassified=%20K00099%20K00626%20K00795%20K00805%20K00806%20K00919%20K00991%20K01770%20K01823%20K02945,ko:K03527%20K03527%20K12503%20K12506%20K13787%20K13789%20K14215%20%20%20%20%20%20%2	K00099	K00626	K00795	K00805	K00806	K00919	K00991	K01770	K01823	K02945,ko:K03527	K03527	K12503	K12506	K13787	K13789	K14215
24	ko00340	0.00395081	0.00422649	Metabolism	Amino Acid Metabolism	Histidine metabolism	0	0.00395081	0.00422649	0.934773	1.06978	-1.06978	1.06978	237	2	39	32	17	http://www.genome.jp/kegg-bin/search_pathway_object?org_name=ko&amp;unclassified=%20K00013%20K00128%20K00492%20K00765%20K00817%20K01270%20K01468%20K01523%20K01590%20K01693%20K01712%20K01745%20K01814%20K02500%20K02501%20K02502%20K11755%20%20%20%20%20%20%20%20%20%20%20%20%20%20%20%20%20%20%20%20%20%20%20%20%20%20%20%20%20%20%20%20%20%20%20%20%20%20%20%20%20%20%20%20%20%20%20%20%20%20%20%20%20%20%20…	http://www.genome.jp/kegg-bin/search_pathway_object?org_name=ko&amp;unclassified=%20K00013%20K00128%20K00492%20K00765%20K00817%20K01270%20K01468%20K01523%20K01590%20K01693%20K01712%20K01745%20K01814%20K02500%20K02501%20K02502%20K11755%20%20%20%20%20%20%20%20%20%20%20%20%20%20%20%20%20%20%20%20%20%20%20%20%20%20%20%20%20%20%20%20%20%20%20%20%20%20%20%20%20%20%20%20%20%20%20%20%20%20%20%20%20%20%20…	K00013	K00128	K00492	K00765	K00817	K01270	K01468	K01523	K01590	K01693	K01712	K01745	K01814	K02500	K02501	K02502	K11755
154	ko00730	0.0037746	0.0043478	Metabolism	Metabolism of Cofactors and Vitamins	Thiamine metabolism	0	0.0037746	0.0043478	0.868164	1.15186	-1.15186	1.15186	236	2	22	18	11	http://www.genome.jp/kegg-bin/search_pathway_object?org_name=ko&amp;unclassified=%20K00788%20K00878%20K00941%20K00946%20K03147%20K03148%20K03149%20K03151%20K03707%20K10811%20K11717%20%20%20%20%20%20%20%20%20%20%20%20%20%20%20%20%20%20%20%20%20%20%20%20%20%20%20%20%20%20%20%20%20%20%20%20%20%20%20%20%20%20%20%20%20%20%20%20%20%20%20%20%20%20%20%20%20%20%20%20%20%20%20%20%20%20%20%20%20%20%20%20%20…	http://www.genome.jp/kegg-bin/search_pathway_object?org_name=ko&amp;unclassified=%20K00788%20K00878%20K00941%20K00946%20K03147%20K03148%20K03149%20K03151%20K03707%20K10811%20K11717%20%20%20%20%20%20%20%20%20%20%20%20%20%20%20%20%20%20%20%20%20%20%20%20%20%20%20%20%20%20%20%20%20%20%20%20%20%20%20%20%20%20%20%20%20%20%20%20%20%20%20%20%20%20%20%20%20%20%20%20%20%20%20%20%20%20%20%20%20%20%20%20%20…	K00788	K00878	K00941	K00946	K03147	K03148	K03149	K03151	K03707	K10811	K11717
100	ko00760	0.00363812	0.00423024	Metabolism	Metabolism of Cofactors and Vitamins	Nicotinate and nicotinamide metabolism	0	0.00363812	0.00423025	0.860025	1.16276	-1.16276	1.16276	235	2	35	28	16	http://www.genome.jp/kegg-bin/search_pathway_object?org_name=ko&amp;unclassified=%20K00278%20K00324%20K00325%20K00763%20K00767%20K00858%20K00969%20K01239%20K01950%20K03426%20K03517%20K03784%20K03787%20K06989%20K08281%20K08722%20%20%20%20%20%20%20%20%20%20%20%20%20%20%20%20%20%20%20%20%20%20%20%20%20%20%20%20%20%20%20%20%20%20%20%20%20%20%20%20%20%20%20%20%20%20%20%20%20%20%20%20%20%20%20%20%20%20…	http://www.genome.jp/kegg-bin/search_pathway_object?org_name=ko&amp;unclassified=%20K00278%20K00324%20K00325%20K00763%20K00767%20K00858%20K00969%20K01239%20K01950%20K03426%20K03517%20K03784%20K03787%20K06989%20K08281%20K08722%20%20%20%20%20%20%20%20%20%20%20%20%20%20%20%20%20%20%20%20%20%20%20%20%20%20%20%20%20%20%20%20%20%20%20%20%20%20%20%20%20%20%20%20%20%20%20%20%20%20%20%20%20%20%20%20%20%20…	K00278	K00324	K00325	K00763	K00767	K00858	K00969	K01239	K01950	K03426	K03517	K03784	K03787	K06989	K08281	K08722
179	ko03410	0.00457694	0.00477468	Genetic Information Processing	Replication and Repair	Base excision repair	0	0.00457694	0.00477468	0.958584	1.0432	-1.0432	1.0432	234	2	41	23	10	http://www.genome.jp/kegg-bin/search_pathway_object?org_name=ko&amp;unclassified=%20K01247%20K01972%20K02335%20K03575%20K03648%20K03652%20K03660%20K07462%20K10563%20K13529%20%20%20%20%20%20%20%20%20%20%20%20%20%20%20%20%20%20%20%20%20%20%20%20%20%20%20%20%20%20%20%20%20%20%20%20%20%20%20%20%20%20%20%20%20%20%20%20%20%20%20%20%20%20%20%20%20%20%20%20%20%20%20%20%20%20%20%20%20%20%20%20%20%20%20%20…	http://www.genome.jp/kegg-bin/search_pathway_object?org_name=ko&amp;unclassified=%20K01247%20K01972%20K02335%20K03575%20K03648%20K03652%20K03660%20K07462%20K10563%20K13529%20%20%20%20%20%20%20%20%20%20%20%20%20%20%20%20%20%20%20%20%20%20%20%20%20%20%20%20%20%20%20%20%20%20%20%20%20%20%20%20%20%20%20%20%20%20%20%20%20%20%20%20%20%20%20%20%20%20%20%20%20%20%20%20%20%20%20%20%20%20%20%20%20%20%20%20…	K01247	K01972	K02335	K03575	K03648	K03652	K03660	K07462	K10563	K13529
56	ko00983	0.00485975	0.00395053	Metabolism	Xenobiotics Biodegradation and Metabolism	Drug metabolism - other enzymes	0	0.00485975	0.00395053	1.23015	0.812907	1.23015	-1.23015	233	2	22	16	8	http://www.genome.jp/kegg-bin/search_pathway_object?org_name=ko&amp;unclassified=%20K00757%20K00758%20K00760%20K00876%20K01195%20K01464%20K01489%20K01951%20%20%20%20%20%20%20%20%20%20%20%20%20%20%20%20%20%20%20%20%20%20%20%20%20%20%20%20%20%20%20%20%20%20%20%20%20%20%20%20%20%20%20%20%20%20%20%20%20%20%20%20%20%20%20%20%20%20%20%20%20%20%20%20%20%20%20%20%20%20%20%20%20%20%20%20%20%20%20%20%20%20…	http://www.genome.jp/kegg-bin/search_pathway_object?org_name=ko&amp;unclassified=%20K00757%20K00758%20K00760%20K00876%20K01195%20K01464%20K01489%20K01951%20%20%20%20%20%20%20%20%20%20%20%20%20%20%20%20%20%20%20%20%20%20%20%20%20%20%20%20%20%20%20%20%20%20%20%20%20%20%20%20%20%20%20%20%20%20%20%20%20%20%20%20%20%20%20%20%20%20%20%20%20%20%20%20%20%20%20%20%20%20%20%20%20%20%20%20%20%20%20%20%20%20…	K00757	K00758	K00760	K00876	K01195	K01464	K01489	K01951
105	ko03000	0.00495482	0.0059775	Genetic Information Processing	Transcription	Transcription factors	0	0.00495482	0.0059775	0.828912	1.2064	-1.2064	1.2064	232	2	809	216	59	http://www.genome.jp/kegg-bin/search_pathway_object?org_name=ko&amp;unclassified=%20K00375%20K02019%20K02099%20K02525%20K02529%20K02584%20K02623%20K02624%20K02647%20K02825%20K03402%20K03436%20K03481%20K03483%20K03484%20K03487%20K03488%20K03497%20K03524%20K03556%20K03567%20K03604%20K03704%20K03705%20K03706%20K03707%20K03708%20K03711%20K03712%20K03719%20K04769%20K05311%20K05346%20K05799%20K06075%20…	http://www.genome.jp/kegg-bin/search_pathway_object?org_name=ko&amp;unclassified=%20K00375%20K02019%20K02099%20K02525%20K02529%20K02584%20K02623%20K02624%20K02647%20K02825%20K03402%20K03436%20K03481%20K03483%20K03484%20K03487%20K03488%20K03497%20K03524%20K03556%20K03567%20K03604%20K03704%20K03705%20K03706%20K03707%20K03708%20K03711%20K03712%20K03719%20K04769%20K05311%20K05346%20K05799%20K06075%20…	K00375	K02019	K02099	K02525	K02529	K02584	K02623	K02624	K02647	K02825	K03402	K03436	K03481	K03483	K03484	K03487	K03488	K03497	K03524	K03556	K03567	K03604	K03704	K03705	K03706	K03707	K03708	K03711	K03712
83	ko00860	0.00478338	0.00571571	Metabolism	Metabolism of Cofactors and Vitamins	Porphyrin and chlorophyll metabolism	0	0.00478338	0.00571571	0.836882	1.19491	-1.19491	1.19491	231	2	103	87	29	http://www.genome.jp/kegg-bin/search_pathway_object?org_name=ko&amp;unclassified=%20K00595%20K00768%20K00798%20K01195%20K01599%20K01749%20K01885%20K02188%20K02189%20K02190%20K02217%20K02224%20K02230%20K02231%20K02233%20K02302%20K02303%20K02304%20K02492%20K02495%20K03394%20K03399%20K03404%20K03405%20K04720%20K05895%20K05934%20K13541%20K13542%20%20%20%20%20%20%20%20%20%20%20%20%20%20%20%20%20%20%20…	http://www.genome.jp/kegg-bin/search_pathway_object?org_name=ko&amp;unclassified=%20K00595%20K00768%20K00798%20K01195%20K01599%20K01749%20K01885%20K02188%20K02189%20K02190%20K02217%20K02224%20K02230%20K02231%20K02233%20K02302%20K02303%20K02304%20K02492%20K02495%20K03394%20K03399%20K03404%20K03405%20K04720%20K05895%20K05934%20K13541%20K13542%20%20%20%20%20%20%20%20%20%20%20%20%20%20%20%20%20%20%20…	K00595	K00768	K00798	K01195	K01599	K01749	K01885	K02188	K02189	K02190	K02217	K02224	K02230	K02231	K02233	K02302	K02303	K02304	K02492	K02495	K03394	K03399	K03404	K03405	K04720	K05895	K05934	K13541	K13542
43	ko00770	0.00468366	0.00643059	Metabolism	Metabolism of Cofactors and Vitamins	Pantothenate and CoA biosynthesis	0	0.00468366	0.00643059	0.72834	1.37298	-1.37298	1.37299	230	2	32	30	16	http://www.genome.jp/kegg-bin/search_pathway_object?org_name=ko&amp;unclassified=%20K00053%20K00077%20K00606%20K00826%20K00859%20K00954%20K00997%20K01464%20K01652%20K01653%20K01918%20K03525%20K06133%20K09680%20K09722%20K13038%20%20%20%20%20%20%20%20%20%20%20%20%20%20%20%20%20%20%20%20%20%20%20%20%20%20%20%20%20%20%20%20%20%20%20%20%20%20%20%20%20%20%20%20%20%20%20%20%20%20%20%20%20%20%20%20%20%20…	http://www.genome.jp/kegg-bin/search_pathway_object?org_name=ko&amp;unclassified=%20K00053%20K00077%20K00606%20K00826%20K00859%20K00954%20K00997%20K01464%20K01652%20K01653%20K01918%20K03525%20K06133%20K09680%20K09722%20K13038%20%20%20%20%20%20%20%20%20%20%20%20%20%20%20%20%20%20%20%20%20%20%20%20%20%20%20%20%20%20%20%20%20%20%20%20%20%20%20%20%20%20%20%20%20%20%20%20%20%20%20%20%20%20%20%20%20%20…	K00053	K00077	K00606	K00826	K00859	K00954	K00997	K01464	K01652	K01653	K01918	K03525	K06133	K09680	K09722	K13038
26	ko00630	0.00413752	0.00590625	Metabolism	Carbohydrate Metabolism	Glyoxylate and dicarboxylate metabolism	0	0.00413752	0.00590625	0.700533	1.42748	-1.42748	1.42748	229	2	66	61	20	http://www.genome.jp/kegg-bin/search_pathway_object?org_name=ko&amp;unclassified=%20K00015%20K00023%20K00104%20K00123%20K00124%20K00626%20K00865%20K01091%20K01625%20K01647%20K01681%20K01715%20K01816%20K01965%20K03780%20K05606%20K07246%20K07248%20K11473%20K14448%20%20%20%20%20%20%20%20%20%20%20%20%20%20%20%20%20%20%20%20%20%20%20%20%20%20%20%20%20%20%20%20%20%20%20%20%20%20%20%20%20%20%20%20%20%20…	http://www.genome.jp/kegg-bin/search_pathway_object?org_name=ko&amp;unclassified=%20K00015%20K00023%20K00104%20K00123%20K00124%20K00626%20K00865%20K01091%20K01625%20K01647%20K01681%20K01715%20K01816%20K01965%20K03780%20K05606%20K07246%20K07248%20K11473%20K14448%20%20%20%20%20%20%20%20%20%20%20%20%20%20%20%20%20%20%20%20%20%20%20%20%20%20%20%20%20%20%20%20%20%20%20%20%20%20%20%20%20%20%20%20%20%20…	K00015	K00023	K00104	K00123	K00124	K00626	K00865	K01091	K01625	K01647	K01681	K01715	K01816	K01965	K03780	K05606	K07246	K07248	K11473	K14448
107	ko00450	0.00445474	0.00538035	Metabolism	Metabolism of Other Amino Acids	Selenocompound metabolism	0	0.00445474	0.00538035	0.827965	1.20778	-1.20778	1.20778	228	2	28	25	14	http://www.genome.jp/kegg-bin/search_pathway_object?org_name=ko&amp;unclassified=%20K00548%20K00549%20K00956%20K00958%20K01008%20K01042%20K01739%20K01760%20K01761%20K01874%20K07309%20K11717%20K12527%20K14155%20%20%20%20%20%20%20%20%20%20%20%20%20%20%20%20%20%20%20%20%20%20%20%20%20%20%20%20%20%20%20%20%20%20%20%20%20%20%20%20%20%20%20%20%20%20%20%20%20%20%20%20%20%20%20%20%20%20%20%20%20%20%20%20…	http://www.genome.jp/kegg-bin/search_pathway_object?org_name=ko&amp;unclassified=%20K00548%20K00549%20K00956%20K00958%20K01008%20K01042%20K01739%20K01760%20K01761%20K01874%20K07309%20K11717%20K12527%20K14155%20%20%20%20%20%20%20%20%20%20%20%20%20%20%20%20%20%20%20%20%20%20%20%20%20%20%20%20%20%20%20%20%20%20%20%20%20%20%20%20%20%20%20%20%20%20%20%20%20%20%20%20%20%20%20%20%20%20%20%20%20%20%20%20…	K00548	K00549	K00956	K00958	K01008	K01042	K01739	K01760	K01761	K01874	K07309	K11717	K12527	K14155
198	ko04112	0.00676764	0.00627587	Cellular Processes	Cell Growth and Death	Cell cycle - Caulobacter	0	0.00676764	0.00627587	1.07836	0.927336	1.07836	-1.07836	227	2	31	29	7	http://www.genome.jp/kegg-bin/search_pathway_object?org_name=ko&amp;unclassified=%20K01358%20K02313%20K02314%20K02563%20K02651%20K03589%20K11749%20%20%20%20%20%20%20%20%20%20%20%20%20%20%20%20%20%20%20%20%20%20%20%20%20%20%20%20%20%20%20%20%20%20%20%20%20%20%20%20%20%20%20%20%20%20%20%20%20%20%20%20%20%20%20%20%20%20%20%20%20%20%20%20%20%20%20%20%20%20%20%20%20%20%20%20%20%20%20%20%20%20%20%20%20…	http://www.genome.jp/kegg-bin/search_pathway_object?org_name=ko&amp;unclassified=%20K01358%20K02313%20K02314%20K02563%20K02651%20K03589%20K11749%20%20%20%20%20%20%20%20%20%20%20%20%20%20%20%20%20%20%20%20%20%20%20%20%20%20%20%20%20%20%20%20%20%20%20%20%20%20%20%20%20%20%20%20%20%20%20%20%20%20%20%20%20%20%20%20%20%20%20%20%20%20%20%20%20%20%20%20%20%20%20%20%20%20%20%20%20%20%20%20%20%20%20%20%20…	K01358	K02313	K02314	K02563	K02651	K03589	K11749
242	ko03060	0.00636055	0.00619252	Genetic Information Processing	Folding, Sorting and Degradation	Protein export	0	0.00636055	0.00619252	1.02713	0.973583	1.02713	-1.02713	226	2	39	22	13	http://www.genome.jp/kegg-bin/search_pathway_object?org_name=ko&amp;unclassified=%20K03072%20K03073%20K03074%20K03076%20K03100%20K03101%20K03106%20K03110%20K03116%20K03117%20K03118%20K03210%20K03217%20%20%20%20%20%20%20%20%20%20%20%20%20%20%20%20%20%20%20%20%20%20%20%20%20%20%20%20%20%20%20%20%20%20%20%20%20%20%20%20%20%20%20%20%20%20%20%20%20%20%20%20%20%20%20%20%20%20%20%20%20%20%20%20%20%20%20…	http://www.genome.jp/kegg-bin/search_pathway_object?org_name=ko&amp;unclassified=%20K03072%20K03073%20K03074%20K03076%20K03100%20K03101%20K03106%20K03110%20K03116%20K03117%20K03118%20K03210%20K03217%20%20%20%20%20%20%20%20%20%20%20%20%20%20%20%20%20%20%20%20%20%20%20%20%20%20%20%20%20%20%20%20%20%20%20%20%20%20%20%20%20%20%20%20%20%20%20%20%20%20%20%20%20%20%20%20%20%20%20%20%20%20%20%20%20%20%20…	K03072	K03073	K03074	K03076	K03100	K03101	K03106	K03110	K03116	K03117	K03118	K03210	K03217
103	ko00670	0.00630387	0.00567492	Metabolism	Metabolism of Cofactors and Vitamins	One carbon pool by folate	0	0.00630388	0.00567493	1.11083	0.900228	1.11083	-1.11083	225	2	27	21	11	http://www.genome.jp/kegg-bin/search_pathway_object?org_name=ko&amp;unclassified=%20K00287%20K00297%20K00548%20K00602%20K00604%20K00605%20K01491%20K01746%20K01934%20K03465%20K08289%20%20%20%20%20%20%20%20%20%20%20%20%20%20%20%20%20%20%20%20%20%20%20%20%20%20%20%20%20%20%20%20%20%20%20%20%20%20%20%20%20%20%20%20%20%20%20%20%20%20%20%20%20%20%20%20%20%20%20%20%20%20%20%20%20%20%20%20%20%20%20%20%20…	http://www.genome.jp/kegg-bin/search_pathway_object?org_name=ko&amp;unclassified=%20K00287%20K00297%20K00548%20K00602%20K00604%20K00605%20K01491%20K01746%20K01934%20K03465%20K08289%20%20%20%20%20%20%20%20%20%20%20%20%20%20%20%20%20%20%20%20%20%20%20%20%20%20%20%20%20%20%20%20%20%20%20%20%20%20%20%20%20%20%20%20%20%20%20%20%20%20%20%20%20%20%20%20%20%20%20%20%20%20%20%20%20%20%20%20%20%20%20%20%20…	K00287	K00297	K00548	K00602	K00604	K00605	K01491	K01746	K01934	K03465	K08289
15	ko00040	0.00554	0.00586945	Metabolism	Carbohydrate Metabolism	Pentose and glucuronate interconversions	0	0.00554	0.00586945	0.94387	1.05947	-1.05947	1.05947	224	2	52	50	18	http://www.genome.jp/kegg-bin/search_pathway_object?org_name=ko&amp;unclassified=%20K00012%20K00041%20K00065%20K00128%20K00874%20K00963%20K01184%20K01195%20K01625%20K01685%20K01730%20K01731%20K01783%20K01786%20K01804%20K01812%20K01815%20K05351%20%20%20%20%20%20%20%20%20%20%20%20%20%20%20%20%20%20%20%20%20%20%20%20%20%20%20%20%20%20%20%20%20%20%20%20%20%20%20%20%20%20%20%20%20%20%20%20%20%20%20%20…	http://www.genome.jp/kegg-bin/search_pathway_object?org_name=ko&amp;unclassified=%20K00012%20K00041%20K00065%20K00128%20K00874%20K00963%20K01184%20K01195%20K01625%20K01685%20K01730%20K01731%20K01783%20K01786%20K01804%20K01812%20K01815%20K05351%20%20%20%20%20%20%20%20%20%20%20%20%20%20%20%20%20%20%20%20%20%20%20%20%20%20%20%20%20%20%20%20%20%20%20%20%20%20%20%20%20%20%20%20%20%20%20%20%20%20%20%20…	K00012	K00041	K00065	K00128	K00874	K00963	K01184	K01195	K01625	K01685	K01730	K01731	K01783	K01786	K01804	K01812	K01815	K05351
27	ko00640	0.00605621	0.00475988	Metabolism	Carbohydrate Metabolism	Propanoate metabolism	0	0.00605621	0.00475989	1.27234	0.785952	1.27234	-1.27234	223	2	66	56	25	http://www.genome.jp/kegg-bin/search_pathway_object?org_name=ko&amp;unclassified=%20K00128%20K00169%20K00170%20K00172%20K00224%20K00249%20K00625%20K00626%20K00656%20K00823%20K00925%20K01026%20K01034%20K01035%20K01848%20K01849%20K01902%20K01903%20K01962%20K01962,ko:K01963%20K01963%20K01965%20K05606%20K07250%20K13788%20%20%20%20%20%20%20%20%20%20%20%20%20%20%20%20%20%20%20%20%20%20%20%20%20%20%20%2…	http://www.genome.jp/kegg-bin/search_pathway_object?org_name=ko&amp;unclassified=%20K00128%20K00169%20K00170%20K00172%20K00224%20K00249%20K00625%20K00626%20K00656%20K00823%20K00925%20K01026%20K01034%20K01035%20K01848%20K01849%20K01902%20K01903%20K01962%20K01962,ko:K01963%20K01963%20K01965%20K05606%20K07250%20K13788%20%20%20%20%20%20%20%20%20%20%20%20%20%20%20%20%20%20%20%20%20%20%20%20%20%20%20%2…	K00128	K00169	K00170	K00172	K00224	K00249	K00625	K00626	K00656	K00823	K00925	K01026	K01034	K01035	K01848	K01849	K01902	K01903	K01962	K01962,ko:K01963	K01963	K01965	K05606	K07250	K13788
9	ko00561	0.00286925	0.00305625	Metabolism	Lipid Metabolism	Glycerolipid metabolism	0	0.00286926	0.00305625	0.938817	1.06517	-1.06517	1.06517	222	2	65	35	14	http://www.genome.jp/kegg-bin/search_pathway_object?org_name=ko&amp;unclassified=%20K00002%20K00005%20K00086%20K00128%20K00655%20K00863%20K00865%20K03429%20K05878%20K05879%20K07406%20K07407%20K08591%20K13919%20%20%20%20%20%20%20%20%20%20%20%20%20%20%20%20%20%20%20%20%20%20%20%20%20%20%20%20%20%20%20%20%20%20%20%20%20%20%20%20%20%20%20%20%20%20%20%20%20%20%20%20%20%20%20%20%20%20%20%20%20%20%20%20…	http://www.genome.jp/kegg-bin/search_pathway_object?org_name=ko&amp;unclassified=%20K00002%20K00005%20K00086%20K00128%20K00655%20K00863%20K00865%20K03429%20K05878%20K05879%20K07406%20K07407%20K08591%20K13919%20%20%20%20%20%20%20%20%20%20%20%20%20%20%20%20%20%20%20%20%20%20%20%20%20%20%20%20%20%20%20%20%20%20%20%20%20%20%20%20%20%20%20%20%20%20%20%20%20%20%20%20%20%20%20%20%20%20%20%20%20%20%20%20…	K00002	K00005	K00086	K00128	K00655	K00863	K00865	K03429	K05878	K05879	K07406	K07407	K08591	K13919
47	ko00564	0.00284175	0.00290452	Metabolism	Lipid Metabolism	Glycerophospholipid metabolism	0	0.00284175	0.00290452	0.978388	1.02209	-1.02209	1.02209	221	2	83	38	16	http://www.genome.jp/kegg-bin/search_pathway_object?org_name=ko&amp;unclassified=%20K00057%20K00111%20K00112%20K00113%20K00655%20K00980%20K00981%20K00998%20K01048%20K01058%20K01095%20K01126%20K01613%20K03735%20K03736%20K08591%20%20%20%20%20%20%20%20%20%20%20%20%20%20%20%20%20%20%20%20%20%20%20%20%20%20%20%20%20%20%20%20%20%20%20%20%20%20%20%20%20%20%20%20%20%20%20%20%20%20%20%20%20%20%20%20%20%20…	http://www.genome.jp/kegg-bin/search_pathway_object?org_name=ko&amp;unclassified=%20K00057%20K00111%20K00112%20K00113%20K00655%20K00980%20K00981%20K00998%20K01048%20K01058%20K01095%20K01126%20K01613%20K03735%20K03736%20K08591%20%20%20%20%20%20%20%20%20%20%20%20%20%20%20%20%20%20%20%20%20%20%20%20%20%20%20%20%20%20%20%20%20%20%20%20%20%20%20%20%20%20%20%20%20%20%20%20%20%20%20%20%20%20%20%20%20%20…	K00057	K00111	K00112	K00113	K00655	K00980	K00981	K00998	K01048	K01058	K01095	K01126	K01613	K03735	K03736	K08591
236	ko02022	0.00303608	0.00288607	Environmental Information Processing	Signal Transduction	Two-component system	0	0.00303609	0.00288607	1.05198	0.950589	1.05198	-1.05198	220	2	196	188	34	http://www.genome.jp/kegg-bin/search_pathway_object?org_name=ko&amp;unclassified=%20K02477%20K02478%20K02480%20K02482%20K02483%20K02486%20K02489%20K03407%20K03412%20K03413%20K03415%20K07636%20K07642%20K07646%20K07658%20K07660%20K07665%20K07678%20K07693%20K07699%20K07709%20K07712%20K07713%20K07714%20K07717%20K07718%20K07720%20K07768%20K07776%20K07777%20K10681%20K10943%20K11614%20K11691%20%20%20%20…	http://www.genome.jp/kegg-bin/search_pathway_object?org_name=ko&amp;unclassified=%20K02477%20K02478%20K02480%20K02482%20K02483%20K02486%20K02489%20K03407%20K03412%20K03413%20K03415%20K07636%20K07642%20K07646%20K07658%20K07660%20K07665%20K07678%20K07693%20K07699%20K07709%20K07712%20K07713%20K07714%20K07717%20K07718%20K07720%20K07768%20K07776%20K07777%20K10681%20K10943%20K11614%20K11691%20%20%20%20…	K02477	K02478	K02480	K02482	K02483	K02486	K02489	K03407	K03412	K03413	K03415	K07636	K07642	K07646	K07658	K07660	K07665	K07678	K07693	K07699	K07709	K07712	K07713	K07714	K07717	K07718	K07720	K07768	K07776
3	ko00350	0.00262072	0.00322299	Metabolism	Amino Acid Metabolism	Tyrosine metabolism	0	0.00262072	0.00322299	0.813133	1.22981	-1.22981	1.22981	219	2	61	40	12	http://www.genome.jp/kegg-bin/search_pathway_object?org_name=ko&amp;unclassified=%20K00001%20K00135%20K00450%20K00817%20K00832%20K01592%20K01668%20K01800%20K01826%20K02510%20K11358%20K13954%20%20%20%20%20%20%20%20%20%20%20%20%20%20%20%20%20%20%20%20%20%20%20%20%20%20%20%20%20%20%20%20%20%20%20%20%20%20%20%20%20%20%20%20%20%20%20%20%20%20%20%20%20%20%20%20%20%20%20%20%20%20%20%20%20%20%20%20%20%20…	http://www.genome.jp/kegg-bin/search_pathway_object?org_name=ko&amp;unclassified=%20K00001%20K00135%20K00450%20K00817%20K00832%20K01592%20K01668%20K01800%20K01826%20K02510%20K11358%20K13954%20%20%20%20%20%20%20%20%20%20%20%20%20%20%20%20%20%20%20%20%20%20%20%20%20%20%20%20%20%20%20%20%20%20%20%20%20%20%20%20%20%20%20%20%20%20%20%20%20%20%20%20%20%20%20%20%20%20%20%20%20%20%20%20%20%20%20%20%20%20…	K00001	K00135	K00450	K00817	K00832	K01592	K01668	K01800	K01826	K02510	K11358	K13954
51	ko00523	0.00252823	0.00274509	Metabolism	Metabolism of Terpenoids and Polyketides	Polyketide sugar unit biosynthesis	0	0.00252823	0.00274509	0.921001	1.08578	-1.08578	1.08578	218	2	32	6	4	http://www.genome.jp/kegg-bin/search_pathway_object?org_name=ko&amp;unclassified=%20K00067%20K00973%20K01710%20K01790%20%20%20%20%20%20%20%20%20%20%20%20%20%20%20%20%20%20%20%20%20%20%20%20%20%20%20%20%20%20%20%20%20%20%20%20%20%20%20%20%20%20%20%20%20%20%20%20%20%20%20%20%20%20%20%20%20%20%20%20%20%20%20%20%20%20%20%20%20%20%20%20%20%20%20%20%20%20%20%20%20%20%20%20%20%20%20%20%20%20%20%20%20%20…	http://www.genome.jp/kegg-bin/search_pathway_object?org_name=ko&amp;unclassified=%20K00067%20K00973%20K01710%20K01790%20%20%20%20%20%20%20%20%20%20%20%20%20%20%20%20%20%20%20%20%20%20%20%20%20%20%20%20%20%20%20%20%20%20%20%20%20%20%20%20%20%20%20%20%20%20%20%20%20%20%20%20%20%20%20%20%20%20%20%20%20%20%20%20%20%20%20%20%20%20%20%20%20%20%20%20%20%20%20%20%20%20%20%20%20%20%20%20%20%20%20%20%20%20…	K00067	K00973	K01710	K01790
228	ko00194	0.00336145	0.00327323	Metabolism	Energy Metabolism	Photosynthesis proteins	0	0.00336145	0.00327323	1.02695	0.973755	1.02695	-1.02695	217	2	137	105	9	http://www.genome.jp/kegg-bin/search_pathway_object?org_name=ko&amp;unclassified=%20K02108%20K02109%20K02111%20K02112%20K02113%20K02114%20K02115%20K02116%20K02290%20%20%20%20%20%20%20%20%20%20%20%20%20%20%20%20%20%20%20%20%20%20%20%20%20%20%20%20%20%20%20%20%20%20%20%20%20%20%20%20%20%20%20%20%20%20%20%20%20%20%20%20%20%20%20%20%20%20%20%20%20%20%20%20%20%20%20%20%20%20%20%20%20%20%20%20%20%20%20…	http://www.genome.jp/kegg-bin/search_pathway_object?org_name=ko&amp;unclassified=%20K02108%20K02109%20K02111%20K02112%20K02113%20K02114%20K02115%20K02116%20K02290%20%20%20%20%20%20%20%20%20%20%20%20%20%20%20%20%20%20%20%20%20%20%20%20%20%20%20%20%20%20%20%20%20%20%20%20%20%20%20%20%20%20%20%20%20%20%20%20%20%20%20%20%20%20%20%20%20%20%20%20%20%20%20%20%20%20%20%20%20%20%20%20%20%20%20%20%20%20%20…	K02108	K02109	K02111	K02112	K02113	K02114	K02115	K02116	K02290
229	ko00195	0.00334726	0.00323186	Metabolism	Energy Metabolism	Photosynthesis	0	0.00334726	0.00323186	1.03571	0.965524	1.03571	-1.03571	216	2	63	49	7	http://www.genome.jp/kegg-bin/search_pathway_object?org_name=ko&amp;unclassified=%20K02108%20K02109%20K02111%20K02112%20K02113%20K02114%20K02115%20%20%20%20%20%20%20%20%20%20%20%20%20%20%20%20%20%20%20%20%20%20%20%20%20%20%20%20%20%20%20%20%20%20%20%20%20%20%20%20%20%20%20%20%20%20%20%20%20%20%20%20%20%20%20%20%20%20%20%20%20%20%20%20%20%20%20%20%20%20%20%20%20%20%20%20%20%20%20%20%20%20%20%20%20…	http://www.genome.jp/kegg-bin/search_pathway_object?org_name=ko&amp;unclassified=%20K02108%20K02109%20K02111%20K02112%20K02113%20K02114%20K02115%20%20%20%20%20%20%20%20%20%20%20%20%20%20%20%20%20%20%20%20%20%20%20%20%20%20%20%20%20%20%20%20%20%20%20%20%20%20%20%20%20%20%20%20%20%20%20%20%20%20%20%20%20%20%20%20%20%20%20%20%20%20%20%20%20%20%20%20%20%20%20%20%20%20%20%20%20%20%20%20%20%20%20%20%20…	K02108	K02109	K02111	K02112	K02113	K02114	K02115
48	ko00061	0.00345253	0.003138	Metabolism	Lipid Metabolism	Fatty acid biosynthesis	0	0.00345253	0.003138	1.10023	0.908898	1.10023	-1.10023	215	2	26	22	10	http://www.genome.jp/kegg-bin/search_pathway_object?org_name=ko&amp;unclassified=%20K00645%20K00647%20K00648%20K01962%20K01962,ko:K01963%20K01963%20K02371%20K02372%20K11263%20K11533%20%20%20%20%20%20%20%20%20%20%20%20%20%20%20%20%20%20%20%20%20%20%20%20%20%20%20%20%20%20%20%20%20%20%20%20%20%20%20%20%20%20%20%20%20%20%20%20%20%20%20%20%20%20%20%20%20%20%20%20%20%20%20%20%20%20%20%20%20%20%20%20%2…	http://www.genome.jp/kegg-bin/search_pathway_object?org_name=ko&amp;unclassified=%20K00645%20K00647%20K00648%20K01962%20K01962,ko:K01963%20K01963%20K02371%20K02372%20K11263%20K11533%20%20%20%20%20%20%20%20%20%20%20%20%20%20%20%20%20%20%20%20%20%20%20%20%20%20%20%20%20%20%20%20%20%20%20%20%20%20%20%20%20%20%20%20%20%20%20%20%20%20%20%20%20%20%20%20%20%20%20%20%20%20%20%20%20%20%20%20%20%20%20%20%2…	K00645	K00647	K00648	K01962	K01962,ko:K01963	K01963	K02371	K02372	K11263	K11533
137	ko00460	0.00303379	0.00357817	Metabolism	Metabolism of Other Amino Acids	Cyanoamino acid metabolism	0	0.00303379	0.00357817	0.84786	1.17944	-1.17944	1.17944	214	2	28	13	5	http://www.genome.jp/kegg-bin/search_pathway_object?org_name=ko&amp;unclassified=%20K00681%20K01188%20K01424%20K01501%20K05349%20%20%20%20%20%20%20%20%20%20%20%20%20%20%20%20%20%20%20%20%20%20%20%20%20%20%20%20%20%20%20%20%20%20%20%20%20%20%20%20%20%20%20%20%20%20%20%20%20%20%20%20%20%20%20%20%20%20%20%20%20%20%20%20%20%20%20%20%20%20%20%20%20%20%20%20%20%20%20%20%20%20%20%20%20%20%20%20%20%20%20…	http://www.genome.jp/kegg-bin/search_pathway_object?org_name=ko&amp;unclassified=%20K00681%20K01188%20K01424%20K01501%20K05349%20%20%20%20%20%20%20%20%20%20%20%20%20%20%20%20%20%20%20%20%20%20%20%20%20%20%20%20%20%20%20%20%20%20%20%20%20%20%20%20%20%20%20%20%20%20%20%20%20%20%20%20%20%20%20%20%20%20%20%20%20%20%20%20%20%20%20%20%20%20%20%20%20%20%20%20%20%20%20%20%20%20%20%20%20%20%20%20%20%20%20…	K00681	K01188	K01424	K01501	K05349
162	ko04626	0.00383752	0.00275709	Organismal Systems	Environmental Adaptation	Plant-pathogen interaction	0	0.00383752	0.00275709	1.39187	0.718457	1.39187	-1.39187	213	2	70	12	1	http://www.genome.jp/kegg-bin/search_pathway_object?org_name=ko&amp;unclassified=%20K02406%20%20%20%20%20%20%20%20%20%20%20%20%20%20%20%20%20%20%20%20%20%20%20%20%20%20%20%20%20%20%20%20%20%20%20%20%20%20%20%20%20%20%20%20%20%20%20%20%20%20%20%20%20%20%20%20%20%20%20%20%20%20%20%20%20%20%20%20%20%20%20%20%20%20%20%20%20%20%20%20%20%20%20%20%20%20%20%20%20%20%20%20%20%20%20%20%20%20%20%20%20%20%20…	http://www.genome.jp/kegg-bin/search_pathway_object?org_name=ko&amp;unclassified=%20K02406%20%20%20%20%20%20%20%20%20%20%20%20%20%20%20%20%20%20%20%20%20%20%20%20%20%20%20%20%20%20%20%20%20%20%20%20%20%20%20%20%20%20%20%20%20%20%20%20%20%20%20%20%20%20%20%20%20%20%20%20%20%20%20%20%20%20%20%20%20%20%20%20%20%20%20%20%20%20%20%20%20%20%20%20%20%20%20%20%20%20%20%20%20%20%20%20%20%20%20%20%20%20%20…	K02406
169	ko05152	0.00369864	0.00285878	Human Diseases	Infectious Diseases	Tuberculosis	0	0.00369864	0.00285878	1.29378	0.772928	1.29378	-1.29378	212	2	139	11	3	http://www.genome.jp/kegg-bin/search_pathway_object?org_name=ko&amp;unclassified=%20K02040%20K04043%20K14949%20%20%20%20%20%20%20%20%20%20%20%20%20%20%20%20%20%20%20%20%20%20%20%20%20%20%20%20%20%20%20%20%20%20%20%20%20%20%20%20%20%20%20%20%20%20%20%20%20%20%20%20%20%20%20%20%20%20%20%20%20%20%20%20%20%20%20%20%20%20%20%20%20%20%20%20%20%20%20%20%20%20%20%20%20%20%20%20%20%20%20%20%20%20%20%20%20…	http://www.genome.jp/kegg-bin/search_pathway_object?org_name=ko&amp;unclassified=%20K02040%20K04043%20K14949%20%20%20%20%20%20%20%20%20%20%20%20%20%20%20%20%20%20%20%20%20%20%20%20%20%20%20%20%20%20%20%20%20%20%20%20%20%20%20%20%20%20%20%20%20%20%20%20%20%20%20%20%20%20%20%20%20%20%20%20%20%20%20%20%20%20%20%20%20%20%20%20%20%20%20%20%20%20%20%20%20%20%20%20%20%20%20%20%20%20%20%20%20%20%20%20%20…	K02040	K04043	K14949
250	ko04812	0.00416362	0.00278757	Cellular Processes	Cell Motility	Cytoskeleton proteins	0	0.00416362	0.00278757	1.49364	0.669506	1.49364	-1.49364	211	2	153	7	2	http://www.genome.jp/kegg-bin/search_pathway_object?org_name=ko&amp;unclassified=%20K03496%20K03497%20%20%20%20%20%20%20%20%20%20%20%20%20%20%20%20%20%20%20%20%20%20%20%20%20%20%20%20%20%20%20%20%20%20%20%20%20%20%20%20%20%20%20%20%20%20%20%20%20%20%20%20%20%20%20%20%20%20%20%20%20%20%20%20%20%20%20%20%20%20%20%20%20%20%20%20%20%20%20%20%20%20%20%20%20%20%20%20%20%20%20%20%20%20%20%20%20%20%20%20…	http://www.genome.jp/kegg-bin/search_pathway_object?org_name=ko&amp;unclassified=%20K03496%20K03497%20%20%20%20%20%20%20%20%20%20%20%20%20%20%20%20%20%20%20%20%20%20%20%20%20%20%20%20%20%20%20%20%20%20%20%20%20%20%20%20%20%20%20%20%20%20%20%20%20%20%20%20%20%20%20%20%20%20%20%20%20%20%20%20%20%20%20%20%20%20%20%20%20%20%20%20%20%20%20%20%20%20%20%20%20%20%20%20%20%20%20%20%20%20%20%20%20%20%20%20…	K03496	K03497
183	ko00511	0.0034227	0.00245876	Metabolism	Glycan Biosynthesis and Metabolism	Other glycan degradation	0	0.0034227	0.00245876	1.39204	0.718369	1.39204	-1.39204	210	2	16	11	6	http://www.genome.jp/kegg-bin/search_pathway_object?org_name=ko&amp;unclassified=%20K01186%20K01191%20K01201%20K01206%20K01227%20K12373%20%20%20%20%20%20%20%20%20%20%20%20%20%20%20%20%20%20%20%20%20%20%20%20%20%20%20%20%20%20%20%20%20%20%20%20%20%20%20%20%20%20%20%20%20%20%20%20%20%20%20%20%20%20%20%20%20%20%20%20%20%20%20%20%20%20%20%20%20%20%20%20%20%20%20%20%20%20%20%20%20%20%20%20%20%20%20%20…	http://www.genome.jp/kegg-bin/search_pathway_object?org_name=ko&amp;unclassified=%20K01186%20K01191%20K01201%20K01206%20K01227%20K12373%20%20%20%20%20%20%20%20%20%20%20%20%20%20%20%20%20%20%20%20%20%20%20%20%20%20%20%20%20%20%20%20%20%20%20%20%20%20%20%20%20%20%20%20%20%20%20%20%20%20%20%20%20%20%20%20%20%20%20%20%20%20%20%20%20%20%20%20%20%20%20%20%20%20%20%20%20%20%20%20%20%20%20%20%20%20%20%20…	K01186	K01191	K01201	K01206	K01227	K12373
30	ko00280	0.00203122	0.00208943	Metabolism	Amino Acid Metabolism	Valine, leucine and isoleucine degradation	0	0.00203122	0.00208943	0.972139	1.02866	-1.02866	1.02866	209	2	57	41	14	http://www.genome.jp/kegg-bin/search_pathway_object?org_name=ko&amp;unclassified=%20K00128%20K00248%20K00249%20K00263%20K00382%20K00626%20K00826%20K01029%20K01640%20K01848%20K01849%20K01965%20K05606%20K07250%20%20%20%20%20%20%20%20%20%20%20%20%20%20%20%20%20%20%20%20%20%20%20%20%20%20%20%20%20%20%20%20%20%20%20%20%20%20%20%20%20%20%20%20%20%20%20%20%20%20%20%20%20%20%20%20%20%20%20%20%20%20%20%20…	http://www.genome.jp/kegg-bin/search_pathway_object?org_name=ko&amp;unclassified=%20K00128%20K00248%20K00249%20K00263%20K00382%20K00626%20K00826%20K01029%20K01640%20K01848%20K01849%20K01965%20K05606%20K07250%20%20%20%20%20%20%20%20%20%20%20%20%20%20%20%20%20%20%20%20%20%20%20%20%20%20%20%20%20%20%20%20%20%20%20%20%20%20%20%20%20%20%20%20%20%20%20%20%20%20%20%20%20%20%20%20%20%20%20%20%20%20%20%20…	K00128	K00248	K00249	K00263	K00382	K00626	K00826	K01029	K01640	K01848	K01849	K01965	K05606	K07250
59	ko00750	0.00188102	0.00219918	Metabolism	Metabolism of Cofactors and Vitamins	Vitamin B6 metabolism	0	0.00188102	0.00219918	0.855326	1.16915	-1.16915	1.16915	208	2	15	11	7	http://www.genome.jp/kegg-bin/search_pathway_object?org_name=ko&amp;unclassified=%20K00097%20K00831%20K00868%20K01733%20K03474%20K06215%20K08681%20%20%20%20%20%20%20%20%20%20%20%20%20%20%20%20%20%20%20%20%20%20%20%20%20%20%20%20%20%20%20%20%20%20%20%20%20%20%20%20%20%20%20%20%20%20%20%20%20%20%20%20%20%20%20%20%20%20%20%20%20%20%20%20%20%20%20%20%20%20%20%20%20%20%20%20%20%20%20%20%20%20%20%20%20…	http://www.genome.jp/kegg-bin/search_pathway_object?org_name=ko&amp;unclassified=%20K00097%20K00831%20K00868%20K01733%20K03474%20K06215%20K08681%20%20%20%20%20%20%20%20%20%20%20%20%20%20%20%20%20%20%20%20%20%20%20%20%20%20%20%20%20%20%20%20%20%20%20%20%20%20%20%20%20%20%20%20%20%20%20%20%20%20%20%20%20%20%20%20%20%20%20%20%20%20%20%20%20%20%20%20%20%20%20%20%20%20%20%20%20%20%20%20%20%20%20%20%20…	K00097	K00831	K00868	K01733	K03474	K06215	K08681
147	ko04910	0.00194598	0.00182579	Organismal Systems	Endocrine System	Insulin signaling pathway	0	0.00194598	0.00182579	1.06583	0.938238	1.06583	-1.06583	207	2	77	10	5	http://www.genome.jp/kegg-bin/search_pathway_object?org_name=ko&amp;unclassified=%20K00844%20K01596%20K03841%20K07190%20K07192%20%20%20%20%20%20%20%20%20%20%20%20%20%20%20%20%20%20%20%20%20%20%20%20%20%20%20%20%20%20%20%20%20%20%20%20%20%20%20%20%20%20%20%20%20%20%20%20%20%20%20%20%20%20%20%20%20%20%20%20%20%20%20%20%20%20%20%20%20%20%20%20%20%20%20%20%20%20%20%20%20%20%20%20%20%20%20%20%20%20%20…	http://www.genome.jp/kegg-bin/search_pathway_object?org_name=ko&amp;unclassified=%20K00844%20K01596%20K03841%20K07190%20K07192%20%20%20%20%20%20%20%20%20%20%20%20%20%20%20%20%20%20%20%20%20%20%20%20%20%20%20%20%20%20%20%20%20%20%20%20%20%20%20%20%20%20%20%20%20%20%20%20%20%20%20%20%20%20%20%20%20%20%20%20%20%20%20%20%20%20%20%20%20%20%20%20%20%20%20%20%20%20%20%20%20%20%20%20%20%20%20%20%20%20%20…	K00844	K01596	K03841	K07190	K07192
44	ko00360	0.00157016	0.00213498	Metabolism	Amino Acid Metabolism	Phenylalanine metabolism	0	0.00157016	0.00213498	0.735442	1.35973	-1.35973	1.35973	206	2	51	35	5	http://www.genome.jp/kegg-bin/search_pathway_object?org_name=ko&amp;unclassified=%20K00817%20K00832%20K01912%20K05713%20K11358%20%20%20%20%20%20%20%20%20%20%20%20%20%20%20%20%20%20%20%20%20%20%20%20%20%20%20%20%20%20%20%20%20%20%20%20%20%20%20%20%20%20%20%20%20%20%20%20%20%20%20%20%20%20%20%20%20%20%20%20%20%20%20%20%20%20%20%20%20%20%20%20%20%20%20%20%20%20%20%20%20%20%20%20%20%20%20%20%20%20%20…	http://www.genome.jp/kegg-bin/search_pathway_object?org_name=ko&amp;unclassified=%20K00817%20K00832%20K01912%20K05713%20K11358%20%20%20%20%20%20%20%20%20%20%20%20%20%20%20%20%20%20%20%20%20%20%20%20%20%20%20%20%20%20%20%20%20%20%20%20%20%20%20%20%20%20%20%20%20%20%20%20%20%20%20%20%20%20%20%20%20%20%20%20%20%20%20%20%20%20%20%20%20%20%20%20%20%20%20%20%20%20%20%20%20%20%20%20%20%20%20%20%20%20%20…	K00817	K00832	K01912	K05713	K11358
141	ko00600	0.00253099	0.00240287	Metabolism	Lipid Metabolism	Sphingolipid metabolism	0	0.00253099	0.00240287	1.05332	0.949381	1.05332	-1.05332	205	2	40	13	5	http://www.genome.jp/kegg-bin/search_pathway_object?org_name=ko&amp;unclassified=%20K01134%20K01186%20K01201%20K07406%20K07407%20%20%20%20%20%20%20%20%20%20%20%20%20%20%20%20%20%20%20%20%20%20%20%20%20%20%20%20%20%20%20%20%20%20%20%20%20%20%20%20%20%20%20%20%20%20%20%20%20%20%20%20%20%20%20%20%20%20%20%20%20%20%20%20%20%20%20%20%20%20%20%20%20%20%20%20%20%20%20%20%20%20%20%20%20%20%20%20%20%20%20…	http://www.genome.jp/kegg-bin/search_pathway_object?org_name=ko&amp;unclassified=%20K01134%20K01186%20K01201%20K07406%20K07407%20%20%20%20%20%20%20%20%20%20%20%20%20%20%20%20%20%20%20%20%20%20%20%20%20%20%20%20%20%20%20%20%20%20%20%20%20%20%20%20%20%20%20%20%20%20%20%20%20%20%20%20%20%20%20%20%20%20%20%20%20%20%20%20%20%20%20%20%20%20%20%20%20%20%20%20%20%20%20%20%20%20%20%20%20%20%20%20%20%20%20…	K01134	K01186	K01201	K07406	K07407
2	ko00071	0.00242406	0.00212721	Metabolism	Lipid Metabolism	Fatty acid metabolism	0	0.00242406	0.00212721	1.13955	0.877541	1.13955	-1.13955	204	2	47	31	9	http://www.genome.jp/kegg-bin/search_pathway_object?org_name=ko&amp;unclassified=%20K00001%20K00128%20K00248%20K00249%20K00493%20K00626%20K01897%20K05297%20K13954%20%20%20%20%20%20%20%20%20%20%20%20%20%20%20%20%20%20%20%20%20%20%20%20%20%20%20%20%20%20%20%20%20%20%20%20%20%20%20%20%20%20%20%20%20%20%20%20%20%20%20%20%20%20%20%20%20%20%20%20%20%20%20%20%20%20%20%20%20%20%20%20%20%20%20%20%20%20%20…	http://www.genome.jp/kegg-bin/search_pathway_object?org_name=ko&amp;unclassified=%20K00001%20K00128%20K00248%20K00249%20K00493%20K00626%20K01897%20K05297%20K13954%20%20%20%20%20%20%20%20%20%20%20%20%20%20%20%20%20%20%20%20%20%20%20%20%20%20%20%20%20%20%20%20%20%20%20%20%20%20%20%20%20%20%20%20%20%20%20%20%20%20%20%20%20%20%20%20%20%20%20%20%20%20%20%20%20%20%20%20%20%20%20%20%20%20%20%20%20%20%20…	K00001	K00128	K00248	K00249	K00493	K00626	K01897	K05297	K13954
212	ko00660	0.00202557	0.00299814	Metabolism	Carbohydrate Metabolism	C5-Branched dibasic acid metabolism	0	0.00202557	0.00299814	0.67561	1.48014	-1.48014	1.48014	203	2	12	12	8	http://www.genome.jp/kegg-bin/search_pathway_object?org_name=ko&amp;unclassified=%20K01652%20K01653%20K01703%20K01704%20K01846%20K01902%20K01903%20K04835%20%20%20%20%20%20%20%20%20%20%20%20%20%20%20%20%20%20%20%20%20%20%20%20%20%20%20%20%20%20%20%20%20%20%20%20%20%20%20%20%20%20%20%20%20%20%20%20%20%20%20%20%20%20%20%20%20%20%20%20%20%20%20%20%20%20%20%20%20%20%20%20%20%20%20%20%20%20%20%20%20%20…	http://www.genome.jp/kegg-bin/search_pathway_object?org_name=ko&amp;unclassified=%20K01652%20K01653%20K01703%20K01704%20K01846%20K01902%20K01903%20K04835%20%20%20%20%20%20%20%20%20%20%20%20%20%20%20%20%20%20%20%20%20%20%20%20%20%20%20%20%20%20%20%20%20%20%20%20%20%20%20%20%20%20%20%20%20%20%20%20%20%20%20%20%20%20%20%20%20%20%20%20%20%20%20%20%20%20%20%20%20%20%20%20%20%20%20%20%20%20%20%20%20%20…	K01652	K01653	K01703	K01704	K01846	K01902	K01903	K04835
148	ko01003	0.00208237	0.00284444	Metabolism	Glycan Biosynthesis and Metabolism	Glycosyltransferases	0	0.00208237	0.00284445	0.732083	1.36596	-1.36596	1.36596	202	2	316	108	17	http://www.genome.jp/kegg-bin/search_pathway_object?org_name=ko&amp;unclassified=%20K00697%20K00721%20K00748%20K02527%20K02841%20K02843%20K02852%20K02853%20K03429%20K05364%20K05367%20K05946%20K07151%20K07272%20K12982%20K13002%20K13685%20%20%20%20%20%20%20%20%20%20%20%20%20%20%20%20%20%20%20%20%20%20%20%20%20%20%20%20%20%20%20%20%20%20%20%20%20%20%20%20%20%20%20%20%20%20%20%20%20%20%20%20%20%20%20…	http://www.genome.jp/kegg-bin/search_pathway_object?org_name=ko&amp;unclassified=%20K00697%20K00721%20K00748%20K02527%20K02841%20K02843%20K02852%20K02853%20K03429%20K05364%20K05367%20K05946%20K07151%20K07272%20K12982%20K13002%20K13685%20%20%20%20%20%20%20%20%20%20%20%20%20%20%20%20%20%20%20%20%20%20%20%20%20%20%20%20%20%20%20%20%20%20%20%20%20%20%20%20%20%20%20%20%20%20%20%20%20%20%20%20%20%20%20…	K00697	K00721	K00748	K02527	K02841	K02843	K02852	K02853	K03429	K05364	K05367	K05946	K07151	K07272	K12982	K13002	K13685
106	ko00920	0.0022631	0.00303429	Metabolism	Energy Metabolism	Sulfur metabolism	0	0.0022631	0.00303429	0.745841	1.34077	-1.34077	1.34077	201	2	32	28	14	http://www.genome.jp/kegg-bin/search_pathway_object?org_name=ko&amp;unclassified=%20K00390%20K00394%20K00395%20K00640%20K00641%20K00651%20K00860%20K00956%20K00958%20K01082%20K01738%20K01739%20K01760%20K14155%20%20%20%20%20%20%20%20%20%20%20%20%20%20%20%20%20%20%20%20%20%20%20%20%20%20%20%20%20%20%20%20%20%20%20%20%20%20%20%20%20%20%20%20%20%20%20%20%20%20%20%20%20%20%20%20%20%20%20%20%20%20%20%20…	http://www.genome.jp/kegg-bin/search_pathway_object?org_name=ko&amp;unclassified=%20K00390%20K00394%20K00395%20K00640%20K00641%20K00651%20K00860%20K00956%20K00958%20K01082%20K01738%20K01739%20K01760%20K14155%20%20%20%20%20%20%20%20%20%20%20%20%20%20%20%20%20%20%20%20%20%20%20%20%20%20%20%20%20%20%20%20%20%20%20%20%20%20%20%20%20%20%20%20%20%20%20%20%20%20%20%20%20%20%20%20%20%20%20%20%20%20%20%20…	K00390	K00394	K00395	K00640	K00641	K00651	K00860	K00956	K00958	K01082	K01738	K01739	K01760	K14155
165	ko01001	0.001994	0.00249936	Metabolism	Enzyme Families	Protein kinases	0	0.00199401	0.00249936	0.797806	1.25344	-1.25344	1.25344	200	2	477	102	22	http://www.genome.jp/kegg-bin/search_pathway_object?org_name=ko&amp;unclassified=%20K00908%20K02478%20K02480%20K02482%20K02486%20K02489%20K03407%20K07636%20K07642%20K07646%20K07678%20K07709%20K07717%20K07718%20K07768%20K07777%20K08884%20K10681%20K11614%20K11691%20K11912%20K14949%20%20%20%20%20%20%20%20%20%20%20%20%20%20%20%20%20%20%20%20%20%20%20%20%20%20%20%20%20%20%20%20%20%20%20%20%20%20%20%20…	http://www.genome.jp/kegg-bin/search_pathway_object?org_name=ko&amp;unclassified=%20K00908%20K02478%20K02480%20K02482%20K02486%20K02489%20K03407%20K07636%20K07642%20K07646%20K07678%20K07709%20K07717%20K07718%20K07768%20K07777%20K08884%20K10681%20K11614%20K11691%20K11912%20K14949%20%20%20%20%20%20%20%20%20%20%20%20%20%20%20%20%20%20%20%20%20%20%20%20%20%20%20%20%20%20%20%20%20%20%20%20%20%20%20%20…	K00908	K02478	K02480	K02482	K02486	K02489	K03407	K07636	K07642	K07646	K07678	K07709	K07717	K07718	K07768	K07777	K08884	K10681	K11614	K11691	K11912	K14949
37	ko00480	0.0016448	0.0030733	Metabolism	Metabolism of Other Amino Acids	Glutathione metabolism	0	0.0016448	0.0030733	0.535191	1.86849	-1.86849	1.86849	199	2	38	24	11	http://www.genome.jp/kegg-bin/search_pathway_object?org_name=ko&amp;unclassified=%20K00033%20K00036%20K00432%20K00681%20K00797%20K01255%20K01256%20K01270%20K01476,ko:K01581%20K01581%20K01919%20%20%20%20%20%20%20%20%20%20%20%20%20%20%20%20%20%20%20%20%20%20%20%20%20%20%20%20%20%20%20%20%20%20%20%20%20%20%20%20%20%20%20%20%20%20%20%20%20%20%20%20%20%20%20%20%20%20%20%20%20%20%20%20%20%20%20%20%20%2…	http://www.genome.jp/kegg-bin/search_pathway_object?org_name=ko&amp;unclassified=%20K00033%20K00036%20K00432%20K00681%20K00797%20K01255%20K01256%20K01270%20K01476,ko:K01581%20K01581%20K01919%20%20%20%20%20%20%20%20%20%20%20%20%20%20%20%20%20%20%20%20%20%20%20%20%20%20%20%20%20%20%20%20%20%20%20%20%20%20%20%20%20%20%20%20%20%20%20%20%20%20%20%20%20%20%20%20%20%20%20%20%20%20%20%20%20%20%20%20%20%2…	K00033	K00036	K00432	K00681	K00797	K01255	K01256	K01270	K01476,ko:K01581	K01581	K01919
134	ko02035	0.00267468	0.00108979	Cellular Processes	Cell Motility	Bacterial motility proteins	0	0.00267468	0.00108979	2.45432	0.407445	2.45432	-2.45432	198	2	137	136	48	http://www.genome.jp/kegg-bin/search_pathway_object?org_name=ko&amp;unclassified=%20K00575%20K02387%20K02388%20K02389%20K02390%20K02392%20K02395%20K02396%20K02397%20K02400%20K02401%20K02403%20K02404%20K02405%20K02406%20K02407%20K02408%20K02409%20K02410%20K02412%20K02413%20K02414%20K02415%20K02416%20K02417%20K02419%20K02420%20K02421%20K02422%20K02556%20K02651%20K02653%20K02654%20K02662%20K02664%20…	http://www.genome.jp/kegg-bin/search_pathway_object?org_name=ko&amp;unclassified=%20K00575%20K02387%20K02388%20K02389%20K02390%20K02392%20K02395%20K02396%20K02397%20K02400%20K02401%20K02403%20K02404%20K02405%20K02406%20K02407%20K02408%20K02409%20K02410%20K02412%20K02413%20K02414%20K02415%20K02416%20K02417%20K02419%20K02420%20K02421%20K02422%20K02556%20K02651%20K02653%20K02654%20K02662%20K02664%20…	K00575	K02387	K02388	K02389	K02390	K02392	K02395	K02396	K02397	K02400	K02401	K02403	K02404	K02405	K02406	K02407	K02408	K02409	K02410	K02412	K02413	K02414	K02415	K02416	K02417	K02419	K02420	K02421	K02422
143	ko01005	0.00261663	0.00478231	Metabolism	Glycan Biosynthesis and Metabolism	Lipopolysaccharide biosynthesis proteins	0	0.00261663	0.00478231	0.547148	1.82766	-1.82766	1.82766	197	2	94	89	26	http://www.genome.jp/kegg-bin/search_pathway_object?org_name=ko&amp;unclassified=%20K00677%20K00748%20K00912%20K00979%20K00996%20K01627%20K01791%20K02474%20K02517%20K02527%20K02535%20K02536%20K02841%20K02843%20K03270%20K03271%20K03272%20K03273%20K03274%20K03760%20K07272%20K12982%20K13002%20K13015%20K13017%20K13019%20%20%20%20%20%20%20%20%20%20%20%20%20%20%20%20%20%20%20%20%20%20%20%20%20%20%20%20…	http://www.genome.jp/kegg-bin/search_pathway_object?org_name=ko&amp;unclassified=%20K00677%20K00748%20K00912%20K00979%20K00996%20K01627%20K01791%20K02474%20K02517%20K02527%20K02535%20K02536%20K02841%20K02843%20K03270%20K03271%20K03272%20K03273%20K03274%20K03760%20K07272%20K12982%20K13002%20K13015%20K13017%20K13019%20%20%20%20%20%20%20%20%20%20%20%20%20%20%20%20%20%20%20%20%20%20%20%20%20%20%20%20…	K00677	K00748	K00912	K00979	K00996	K01627	K01791	K02474	K02517	K02527	K02535	K02536	K02841	K02843	K03270	K03271	K03272	K03273	K03274	K03760	K07272	K12982	K13002	K13015	K13017	K13019
142	ko00540	0.001651	0.00382439	Metabolism	Glycan Biosynthesis and Metabolism	Lipopolysaccharide biosynthesis	0	0.00165101	0.00382439	0.431704	2.3164	-2.3164	2.3164	196	2	30	30	16	http://www.genome.jp/kegg-bin/search_pathway_object?org_name=ko&amp;unclassified=%20K00677%20K00748%20K00912%20K00979%20K01627%20K02517%20K02527%20K02535%20K02536%20K02841%20K02843%20K03270%20K03271%20K03272%20K03273%20K03274%20%20%20%20%20%20%20%20%20%20%20%20%20%20%20%20%20%20%20%20%20%20%20%20%20%20%20%20%20%20%20%20%20%20%20%20%20%20%20%20%20%20%20%20%20%20%20%20%20%20%20%20%20%20%20%20%20%20…	http://www.genome.jp/kegg-bin/search_pathway_object?org_name=ko&amp;unclassified=%20K00677%20K00748%20K00912%20K00979%20K01627%20K02517%20K02527%20K02535%20K02536%20K02841%20K02843%20K03270%20K03271%20K03272%20K03273%20K03274%20%20%20%20%20%20%20%20%20%20%20%20%20%20%20%20%20%20%20%20%20%20%20%20%20%20%20%20%20%20%20%20%20%20%20%20%20%20%20%20%20%20%20%20%20%20%20%20%20%20%20%20%20%20%20%20%20%20…	K00677	K00748	K00912	K00979	K01627	K02517	K02527	K02535	K02536	K02841	K02843	K03270	K03271	K03272	K03273	K03274
249	ko03051	0.00103992	0.00105394	Genetic Information Processing	Folding, Sorting and Degradation	Proteasome	0	0.00103992	0.00105394	0.986697	1.01348	-1.01348	1.01348	195	2	73	6	3	http://www.genome.jp/kegg-bin/search_pathway_object?org_name=ko&amp;unclassified=%20K03420%20K13527%20K13571%20%20%20%20%20%20%20%20%20%20%20%20%20%20%20%20%20%20%20%20%20%20%20%20%20%20%20%20%20%20%20%20%20%20%20%20%20%20%20%20%20%20%20%20%20%20%20%20%20%20%20%20%20%20%20%20%20%20%20%20%20%20%20%20%20%20%20%20%20%20%20%20%20%20%20%20%20%20%20%20%20%20%20%20%20%20%20%20%20%20%20%20%20%20%20%20%20…	http://www.genome.jp/kegg-bin/search_pathway_object?org_name=ko&amp;unclassified=%20K03420%20K13527%20K13571%20%20%20%20%20%20%20%20%20%20%20%20%20%20%20%20%20%20%20%20%20%20%20%20%20%20%20%20%20%20%20%20%20%20%20%20%20%20%20%20%20%20%20%20%20%20%20%20%20%20%20%20%20%20%20%20%20%20%20%20%20%20%20%20%20%20%20%20%20%20%20%20%20%20%20%20%20%20%20%20%20%20%20%20%20%20%20%20%20%20%20%20%20%20%20%20%20…	K03420	K13527	K13571
21	ko00053	0.00104191	0.00103954	Metabolism	Carbohydrate Metabolism	Ascorbate and aldarate metabolism	0	0.00104191	0.00103955	1.00228	0.997726	1.00228	-1.00228	194	3	35	26	5	http://www.genome.jp/kegg-bin/search_pathway_object?org_name=ko&amp;unclassified=%20K00012%20K00128%20K01630%20K01706%20K01708%20%20%20%20%20%20%20%20%20%20%20%20%20%20%20%20%20%20%20%20%20%20%20%20%20%20%20%20%20%20%20%20%20%20%20%20%20%20%20%20%20%20%20%20%20%20%20%20%20%20%20%20%20%20%20%20%20%20%20%20%20%20%20%20%20%20%20%20%20%20%20%20%20%20%20%20%20%20%20%20%20%20%20%20%20%20%20%20%20%20%20…	http://www.genome.jp/kegg-bin/search_pathway_object?org_name=ko&amp;unclassified=%20K00012%20K00128%20K01630%20K01706%20K01708%20%20%20%20%20%20%20%20%20%20%20%20%20%20%20%20%20%20%20%20%20%20%20%20%20%20%20%20%20%20%20%20%20%20%20%20%20%20%20%20%20%20%20%20%20%20%20%20%20%20%20%20%20%20%20%20%20%20%20%20%20%20%20%20%20%20%20%20%20%20%20%20%20%20%20%20%20%20%20%20%20%20%20%20%20%20%20%20%20%20%20…	K00012	K00128	K01630	K01706	K01708
217	ko01055	0.000976335	0.00102363	Metabolism	Metabolism of Terpenoids and Polyketides	Biosynthesis of vancomycin group antibiotics	0	0.000976336	0.00102363	0.953795	1.04844	-1.04844	1.04844	193	3	1	1	1	http://www.genome.jp/kegg-bin/search_pathway_object?org_name=ko&amp;unclassified=%20K01710%20%20%20%20%20%20%20%20%20%20%20%20%20%20%20%20%20%20%20%20%20%20%20%20%20%20%20%20%20%20%20%20%20%20%20%20%20%20%20%20%20%20%20%20%20%20%20%20%20%20%20%20%20%20%20%20%20%20%20%20%20%20%20%20%20%20%20%20%20%20%20%20%20%20%20%20%20%20%20%20%20%20%20%20%20%20%20%20%20%20%20%20%20%20%20%20%20%20%20%20%20%20%20…	http://www.genome.jp/kegg-bin/search_pathway_object?org_name=ko&amp;unclassified=%20K01710%20%20%20%20%20%20%20%20%20%20%20%20%20%20%20%20%20%20%20%20%20%20%20%20%20%20%20%20%20%20%20%20%20%20%20%20%20%20%20%20%20%20%20%20%20%20%20%20%20%20%20%20%20%20%20%20%20%20%20%20%20%20%20%20%20%20%20%20%20%20%20%20%20%20%20%20%20%20%20%20%20%20%20%20%20%20%20%20%20%20%20%20%20%20%20%20%20%20%20%20%20%20%20…	K01710
17	ko00562	0.000979185	0.00110395	Metabolism	Carbohydrate Metabolism	Inositol phosphate metabolism	0	0.000979186	0.00110395	0.886986	1.12741	-1.12741	1.12741	192	3	45	18	5	http://www.genome.jp/kegg-bin/search_pathway_object?org_name=ko&amp;unclassified=%20K00010%20K01092%20K03335%20K03336%20K03339%20%20%20%20%20%20%20%20%20%20%20%20%20%20%20%20%20%20%20%20%20%20%20%20%20%20%20%20%20%20%20%20%20%20%20%20%20%20%20%20%20%20%20%20%20%20%20%20%20%20%20%20%20%20%20%20%20%20%20%20%20%20%20%20%20%20%20%20%20%20%20%20%20%20%20%20%20%20%20%20%20%20%20%20%20%20%20%20%20%20%20…	http://www.genome.jp/kegg-bin/search_pathway_object?org_name=ko&amp;unclassified=%20K00010%20K01092%20K03335%20K03336%20K03339%20%20%20%20%20%20%20%20%20%20%20%20%20%20%20%20%20%20%20%20%20%20%20%20%20%20%20%20%20%20%20%20%20%20%20%20%20%20%20%20%20%20%20%20%20%20%20%20%20%20%20%20%20%20%20%20%20%20%20%20%20%20%20%20%20%20%20%20%20%20%20%20%20%20%20%20%20%20%20%20%20%20%20%20%20%20%20%20%20%20%20…	K00010	K01092	K03335	K03336	K03339
186	ko04141	0.00113843	0.00104817	Genetic Information Processing	Folding, Sorting and Degradation	Protein processing in endoplasmic reticulum	0	0.00113843	0.00104817	1.08612	0.92071	1.08612	-1.08612	191	3	137	7	3	http://www.genome.jp/kegg-bin/search_pathway_object?org_name=ko&amp;unclassified=%20K07151%20K13525%20K13993%20%20%20%20%20%20%20%20%20%20%20%20%20%20%20%20%20%20%20%20%20%20%20%20%20%20%20%20%20%20%20%20%20%20%20%20%20%20%20%20%20%20%20%20%20%20%20%20%20%20%20%20%20%20%20%20%20%20%20%20%20%20%20%20%20%20%20%20%20%20%20%20%20%20%20%20%20%20%20%20%20%20%20%20%20%20%20%20%20%20%20%20%20%20%20%20%20…	http://www.genome.jp/kegg-bin/search_pathway_object?org_name=ko&amp;unclassified=%20K07151%20K13525%20K13993%20%20%20%20%20%20%20%20%20%20%20%20%20%20%20%20%20%20%20%20%20%20%20%20%20%20%20%20%20%20%20%20%20%20%20%20%20%20%20%20%20%20%20%20%20%20%20%20%20%20%20%20%20%20%20%20%20%20%20%20%20%20%20%20%20%20%20%20%20%20%20%20%20%20%20%20%20%20%20%20%20%20%20%20%20%20%20%20%20%20%20%20%20%20%20%20%20…	K07151	K13525	K13993
215	ko05200	0.0011082	0.0010586	Human Diseases	Cancers	Pathways in cancer	0	0.0011082	0.0010586	1.04686	0.955238	1.04686	-1.04686	190	3	239	6	1	http://www.genome.jp/kegg-bin/search_pathway_object?org_name=ko&amp;unclassified=%20K01679%20%20%20%20%20%20%20%20%20%20%20%20%20%20%20%20%20%20%20%20%20%20%20%20%20%20%20%20%20%20%20%20%20%20%20%20%20%20%20%20%20%20%20%20%20%20%20%20%20%20%20%20%20%20%20%20%20%20%20%20%20%20%20%20%20%20%20%20%20%20%20%20%20%20%20%20%20%20%20%20%20%20%20%20%20%20%20%20%20%20%20%20%20%20%20%20%20%20%20%20%20%20%20…	http://www.genome.jp/kegg-bin/search_pathway_object?org_name=ko&amp;unclassified=%20K01679%20%20%20%20%20%20%20%20%20%20%20%20%20%20%20%20%20%20%20%20%20%20%20%20%20%20%20%20%20%20%20%20%20%20%20%20%20%20%20%20%20%20%20%20%20%20%20%20%20%20%20%20%20%20%20%20%20%20%20%20%20%20%20%20%20%20%20%20%20%20%20%20%20%20%20%20%20%20%20%20%20%20%20%20%20%20%20%20%20%20%20%20%20%20%20%20%20%20%20%20%20%20%20…	K01679
152	ko02042	0.000877861	0.000995653	Environmental Information Processing	Signaling Molecules and Interaction	Bacterial toxins	0	0.000877862	0.000995654	0.881693	1.13418	-1.13418	1.13418	189	3	72	54	3	http://www.genome.jp/kegg-bin/search_pathway_object?org_name=ko&amp;unclassified=%20K01186%20K03699%20K11068%20%20%20%20%20%20%20%20%20%20%20%20%20%20%20%20%20%20%20%20%20%20%20%20%20%20%20%20%20%20%20%20%20%20%20%20%20%20%20%20%20%20%20%20%20%20%20%20%20%20%20%20%20%20%20%20%20%20%20%20%20%20%20%20%20%20%20%20%20%20%20%20%20%20%20%20%20%20%20%20%20%20%20%20%20%20%20%20%20%20%20%20%20%20%20%20%20…	http://www.genome.jp/kegg-bin/search_pathway_object?org_name=ko&amp;unclassified=%20K01186%20K03699%20K11068%20%20%20%20%20%20%20%20%20%20%20%20%20%20%20%20%20%20%20%20%20%20%20%20%20%20%20%20%20%20%20%20%20%20%20%20%20%20%20%20%20%20%20%20%20%20%20%20%20%20%20%20%20%20%20%20%20%20%20%20%20%20%20%20%20%20%20%20%20%20%20%20%20%20%20%20%20%20%20%20%20%20%20%20%20%20%20%20%20%20%20%20%20%20%20%20%20…	K01186	K03699	K11068
256	ko04914	0.00103636	0.00079943	Organismal Systems	Endocrine System	Progesterone-mediated oocyte maturation	0	0.00103636	0.000799431	1.29638	0.77138	1.29638	-1.29638	188	3	59	1	0	http://www.genome.jp/kegg-bin/search_pathway_object?org_name=ko&amp;unclassified=%20%20%20%20%20%20%20%20%20%20%20%20%20%20%20%20%20%20%20%20%20%20%20%20%20%20%20%20%20%20%20%20%20%20%20%20%20%20%20%20%20%20%20%20%20%20%20%20%20%20%20%20%20%20%20%20%20%20%20%20%20%20%20%20%20%20%20%20%20%20%20%20%20%20%20%20%20%20%20%20%20%20%20%20%20%20%20%20%20%20%20%20%20%20%20%20%20%20%20%20%20%20%20%20%20%20…	http://www.genome.jp/kegg-bin/search_pathway_object?org_name=ko&amp;unclassified=%20%20%20%20%20%20%20%20%20%20%20%20%20%20%20%20%20%20%20%20%20%20%20%20%20%20%20%20%20%20%20%20%20%20%20%20%20%20%20%20%20%20%20%20%20%20%20%20%20%20%20%20%20%20%20%20%20%20%20%20%20%20%20%20%20%20%20%20%20%20%20%20%20%20%20%20%20%20%20%20%20%20%20%20%20%20%20%20%20%20%20%20%20%20%20%20%20%20%20%20%20%20%20%20%20%20…
255	ko04612	0.00103636	0.00079943	Organismal Systems	Immune System	Antigen processing and presentation	0	0.00103636	0.000799431	1.29638	0.77138	1.29638	-1.29638	187	3	41	1	0	http://www.genome.jp/kegg-bin/search_pathway_object?org_name=ko&amp;unclassified=%20%20%20%20%20%20%20%20%20%20%20%20%20%20%20%20%20%20%20%20%20%20%20%20%20%20%20%20%20%20%20%20%20%20%20%20%20%20%20%20%20%20%20%20%20%20%20%20%20%20%20%20%20%20%20%20%20%20%20%20%20%20%20%20%20%20%20%20%20%20%20%20%20%20%20%20%20%20%20%20%20%20%20%20%20%20%20%20%20%20%20%20%20%20%20%20%20%20%20%20%20%20%20%20%20%20…	http://www.genome.jp/kegg-bin/search_pathway_object?org_name=ko&amp;unclassified=%20%20%20%20%20%20%20%20%20%20%20%20%20%20%20%20%20%20%20%20%20%20%20%20%20%20%20%20%20%20%20%20%20%20%20%20%20%20%20%20%20%20%20%20%20%20%20%20%20%20%20%20%20%20%20%20%20%20%20%20%20%20%20%20%20%20%20%20%20%20%20%20%20%20%20%20%20%20%20%20%20%20%20%20%20%20%20%20%20%20%20%20%20%20%20%20%20%20%20%20%20%20%20%20%20%20…
257	ko05215	0.00103818	0.000799875	Human Diseases	Cancers	Prostate cancer	0	0.00103819	0.000799876	1.29793	0.770455	1.29793	-1.29793	186	3	68	2	0	http://www.genome.jp/kegg-bin/search_pathway_object?org_name=ko&amp;unclassified=%20%20%20%20%20%20%20%20%20%20%20%20%20%20%20%20%20%20%20%20%20%20%20%20%20%20%20%20%20%20%20%20%20%20%20%20%20%20%20%20%20%20%20%20%20%20%20%20%20%20%20%20%20%20%20%20%20%20%20%20%20%20%20%20%20%20%20%20%20%20%20%20%20%20%20%20%20%20%20%20%20%20%20%20%20%20%20%20%20%20%20%20%20%20%20%20%20%20%20%20%20%20%20%20%20%20…	http://www.genome.jp/kegg-bin/search_pathway_object?org_name=ko&amp;unclassified=%20%20%20%20%20%20%20%20%20%20%20%20%20%20%20%20%20%20%20%20%20%20%20%20%20%20%20%20%20%20%20%20%20%20%20%20%20%20%20%20%20%20%20%20%20%20%20%20%20%20%20%20%20%20%20%20%20%20%20%20%20%20%20%20%20%20%20%20%20%20%20%20%20%20%20%20%20%20%20%20%20%20%20%20%20%20%20%20%20%20%20%20%20%20%20%20%20%20%20%20%20%20%20%20%20%20…
254	ko04621	0.00104021	0.000800963	Organismal Systems	Immune System	NOD-like receptor signaling pathway	0	0.00104021	0.000800964	1.2987	0.77	1.2987	-1.2987	185	3	51	5	0	http://www.genome.jp/kegg-bin/search_pathway_object?org_name=ko&amp;unclassified=%20%20%20%20%20%20%20%20%20%20%20%20%20%20%20%20%20%20%20%20%20%20%20%20%20%20%20%20%20%20%20%20%20%20%20%20%20%20%20%20%20%20%20%20%20%20%20%20%20%20%20%20%20%20%20%20%20%20%20%20%20%20%20%20%20%20%20%20%20%20%20%20%20%20%20%20%20%20%20%20%20%20%20%20%20%20%20%20%20%20%20%20%20%20%20%20%20%20%20%20%20%20%20%20%20%20…	http://www.genome.jp/kegg-bin/search_pathway_object?org_name=ko&amp;unclassified=%20%20%20%20%20%20%20%20%20%20%20%20%20%20%20%20%20%20%20%20%20%20%20%20%20%20%20%20%20%20%20%20%20%20%20%20%20%20%20%20%20%20%20%20%20%20%20%20%20%20%20%20%20%20%20%20%20%20%20%20%20%20%20%20%20%20%20%20%20%20%20%20%20%20%20%20%20%20%20%20%20%20%20%20%20%20%20%20%20%20%20%20%20%20%20%20%20%20%20%20%20%20%20%20%20%20…
74	ko05010	0.00107518	0.000811631	Human Diseases	Neurodegenerative Diseases	Alzheimer's disease	0	0.00107518	0.000811632	1.32472	0.754878	1.32472	-1.32472	184	3	140	8	0	http://www.genome.jp/kegg-bin/search_pathway_object?org_name=ko&amp;unclassified=%20%20%20%20%20%20%20%20%20%20%20%20%20%20%20%20%20%20%20%20%20%20%20%20%20%20%20%20%20%20%20%20%20%20%20%20%20%20%20%20%20%20%20%20%20%20%20%20%20%20%20%20%20%20%20%20%20%20%20%20%20%20%20%20%20%20%20%20%20%20%20%20%20%20%20%20%20%20%20%20%20%20%20%20%20%20%20%20%20%20%20%20%20%20%20%20%20%20%20%20%20%20%20%20%20%20…	http://www.genome.jp/kegg-bin/search_pathway_object?org_name=ko&amp;unclassified=%20%20%20%20%20%20%20%20%20%20%20%20%20%20%20%20%20%20%20%20%20%20%20%20%20%20%20%20%20%20%20%20%20%20%20%20%20%20%20%20%20%20%20%20%20%20%20%20%20%20%20%20%20%20%20%20%20%20%20%20%20%20%20%20%20%20%20%20%20%20%20%20%20%20%20%20%20%20%20%20%20%20%20%20%20%20%20%20%20%20%20%20%20%20%20%20%20%20%20%20%20%20%20%20%20%20…
69	ko00310	0.00117191	0.000845273	Metabolism	Amino Acid Metabolism	Lysine degradation	0	0.00117192	0.000845274	1.38643	0.721276	1.38643	-1.38643	183	3	54	24	7	http://www.genome.jp/kegg-bin/search_pathway_object?org_name=ko&amp;unclassified=%20K00128%20K00290%20K00471%20K00626%20K00658%20K01843%20K01844%20%20%20%20%20%20%20%20%20%20%20%20%20%20%20%20%20%20%20%20%20%20%20%20%20%20%20%20%20%20%20%20%20%20%20%20%20%20%20%20%20%20%20%20%20%20%20%20%20%20%20%20%20%20%20%20%20%20%20%20%20%20%20%20%20%20%20%20%20%20%20%20%20%20%20%20%20%20%20%20%20%20%20%20%20…	http://www.genome.jp/kegg-bin/search_pathway_object?org_name=ko&amp;unclassified=%20K00128%20K00290%20K00471%20K00626%20K00658%20K01843%20K01844%20%20%20%20%20%20%20%20%20%20%20%20%20%20%20%20%20%20%20%20%20%20%20%20%20%20%20%20%20%20%20%20%20%20%20%20%20%20%20%20%20%20%20%20%20%20%20%20%20%20%20%20%20%20%20%20%20%20%20%20%20%20%20%20%20%20%20%20%20%20%20%20%20%20%20%20%20%20%20%20%20%20%20%20%20…	K00128	K00290	K00471	K00626	K00658	K01843	K01844
294	ko00603	0.00138681	0.000994363	Metabolism	Glycan Biosynthesis and Metabolism	Glycosphingolipid biosynthesis - globo series	0	0.00138681	0.000994364	1.39467	0.717016	1.39467	-1.39467	182	3	14	3	3	http://www.genome.jp/kegg-bin/search_pathway_object?org_name=ko&amp;unclassified=%20K07406%20K07407%20K12373%20%20%20%20%20%20%20%20%20%20%20%20%20%20%20%20%20%20%20%20%20%20%20%20%20%20%20%20%20%20%20%20%20%20%20%20%20%20%20%20%20%20%20%20%20%20%20%20%20%20%20%20%20%20%20%20%20%20%20%20%20%20%20%20%20%20%20%20%20%20%20%20%20%20%20%20%20%20%20%20%20%20%20%20%20%20%20%20%20%20%20%20%20%20%20%20%20…	http://www.genome.jp/kegg-bin/search_pathway_object?org_name=ko&amp;unclassified=%20K07406%20K07407%20K12373%20%20%20%20%20%20%20%20%20%20%20%20%20%20%20%20%20%20%20%20%20%20%20%20%20%20%20%20%20%20%20%20%20%20%20%20%20%20%20%20%20%20%20%20%20%20%20%20%20%20%20%20%20%20%20%20%20%20%20%20%20%20%20%20%20%20%20%20%20%20%20%20%20%20%20%20%20%20%20%20%20%20%20%20%20%20%20%20%20%20%20%20%20%20%20%20%20…	K07406	K07407	K12373
6	ko00626	0.00128578	0.000937151	Metabolism	Xenobiotics Biodegradation and Metabolism	Naphthalene degradation	0	0.00128578	0.000937152	1.37201	0.728859	1.37201	-1.37201	181	3	28	23	8	http://www.genome.jp/kegg-bin/search_pathway_object?org_name=ko&amp;unclassified=%20K00001%20K00100,ko:K01726%20K00155%20K00257%20K00480%20K00492%20K01726%20K13954%20%20%20%20%20%20%20%20%20%20%20%20%20%20%20%20%20%20%20%20%20%20%20%20%20%20%20%20%20%20%20%20%20%20%20%20%20%20%20%20%20%20%20%20%20%20%20%20%20%20%20%20%20%20%20%20%20%20%20%20%20%20%20%20%20%20%20%20%20%20%20%20%20%20%20%20%20%20%2…	http://www.genome.jp/kegg-bin/search_pathway_object?org_name=ko&amp;unclassified=%20K00001%20K00100,ko:K01726%20K00155%20K00257%20K00480%20K00492%20K01726%20K13954%20%20%20%20%20%20%20%20%20%20%20%20%20%20%20%20%20%20%20%20%20%20%20%20%20%20%20%20%20%20%20%20%20%20%20%20%20%20%20%20%20%20%20%20%20%20%20%20%20%20%20%20%20%20%20%20%20%20%20%20%20%20%20%20%20%20%20%20%20%20%20%20%20%20%20%20%20%20%2…	K00001	K00100,ko:K01726	K00155	K00257	K00480	K00492	K01726	K13954
171	ko04920	0.000634534	0.000783611	Organismal Systems	Endocrine System	Adipocytokine signaling pathway	0	0.000634535	0.000783612	0.809757	1.23494	-1.23494	1.23494	180	3	45	4	2	http://www.genome.jp/kegg-bin/search_pathway_object?org_name=ko&amp;unclassified=%20K01596%20K01897%20%20%20%20%20%20%20%20%20%20%20%20%20%20%20%20%20%20%20%20%20%20%20%20%20%20%20%20%20%20%20%20%20%20%20%20%20%20%20%20%20%20%20%20%20%20%20%20%20%20%20%20%20%20%20%20%20%20%20%20%20%20%20%20%20%20%20%20%20%20%20%20%20%20%20%20%20%20%20%20%20%20%20%20%20%20%20%20%20%20%20%20%20%20%20%20%20%20%20%20…	http://www.genome.jp/kegg-bin/search_pathway_object?org_name=ko&amp;unclassified=%20K01596%20K01897%20%20%20%20%20%20%20%20%20%20%20%20%20%20%20%20%20%20%20%20%20%20%20%20%20%20%20%20%20%20%20%20%20%20%20%20%20%20%20%20%20%20%20%20%20%20%20%20%20%20%20%20%20%20%20%20%20%20%20%20%20%20%20%20%20%20%20%20%20%20%20%20%20%20%20%20%20%20%20%20%20%20%20%20%20%20%20%20%20%20%20%20%20%20%20%20%20%20%20%20…	K01596	K01897
145	ko04090	0.000580503	0.000831773	Environmental Information Processing	Signaling Molecules and Interaction	Cellular antigens	0	0.000580504	0.000831774	0.697911	1.43285	-1.43285	1.43285	179	3	349	7	2	http://www.genome.jp/kegg-bin/search_pathway_object?org_name=ko&amp;unclassified=%20K00681%20K01278%20%20%20%20%20%20%20%20%20%20%20%20%20%20%20%20%20%20%20%20%20%20%20%20%20%20%20%20%20%20%20%20%20%20%20%20%20%20%20%20%20%20%20%20%20%20%20%20%20%20%20%20%20%20%20%20%20%20%20%20%20%20%20%20%20%20%20%20%20%20%20%20%20%20%20%20%20%20%20%20%20%20%20%20%20%20%20%20%20%20%20%20%20%20%20%20%20%20%20%20…	http://www.genome.jp/kegg-bin/search_pathway_object?org_name=ko&amp;unclassified=%20K00681%20K01278%20%20%20%20%20%20%20%20%20%20%20%20%20%20%20%20%20%20%20%20%20%20%20%20%20%20%20%20%20%20%20%20%20%20%20%20%20%20%20%20%20%20%20%20%20%20%20%20%20%20%20%20%20%20%20%20%20%20%20%20%20%20%20%20%20%20%20%20%20%20%20%20%20%20%20%20%20%20%20%20%20%20%20%20%20%20%20%20%20%20%20%20%20%20%20%20%20%20%20%20…	K00681	K01278
233	ko05111	0.000483507	0.000745257	Human Diseases	Infectious Diseases	Vibrio cholerae pathogenic cycle	0	0.000483508	0.000745258	0.648779	1.54136	-1.54136	1.54136	178	3	42	34	5	http://www.genome.jp/kegg-bin/search_pathway_object?org_name=ko&amp;unclassified=%20K02405%20K03087%20K03092%20K10941%20K10943%20%20%20%20%20%20%20%20%20%20%20%20%20%20%20%20%20%20%20%20%20%20%20%20%20%20%20%20%20%20%20%20%20%20%20%20%20%20%20%20%20%20%20%20%20%20%20%20%20%20%20%20%20%20%20%20%20%20%20%20%20%20%20%20%20%20%20%20%20%20%20%20%20%20%20%20%20%20%20%20%20%20%20%20%20%20%20%20%20%20%20…	http://www.genome.jp/kegg-bin/search_pathway_object?org_name=ko&amp;unclassified=%20K02405%20K03087%20K03092%20K10941%20K10943%20%20%20%20%20%20%20%20%20%20%20%20%20%20%20%20%20%20%20%20%20%20%20%20%20%20%20%20%20%20%20%20%20%20%20%20%20%20%20%20%20%20%20%20%20%20%20%20%20%20%20%20%20%20%20%20%20%20%20%20%20%20%20%20%20%20%20%20%20%20%20%20%20%20%20%20%20%20%20%20%20%20%20%20%20%20%20%20%20%20%20…	K02405	K03087	K03092	K10941	K10943
67	ko00627	0.000375167	0.000838839	Metabolism	Xenobiotics Biodegradation and Metabolism	Aminobenzoate degradation	0	0.000375168	0.00083884	0.447247	2.2359	-2.2359	2.23591	177	3	59	49	10	http://www.genome.jp/kegg-bin/search_pathway_object?org_name=ko&amp;unclassified=%20K00492%20K00493%20K01034%20K01035%20K01066%20K01077%20K01501%20K01512%20K03862%20K09474%20%20%20%20%20%20%20%20%20%20%20%20%20%20%20%20%20%20%20%20%20%20%20%20%20%20%20%20%20%20%20%20%20%20%20%20%20%20%20%20%20%20%20%20%20%20%20%20%20%20%20%20%20%20%20%20%20%20%20%20%20%20%20%20%20%20%20%20%20%20%20%20%20%20%20%20…	http://www.genome.jp/kegg-bin/search_pathway_object?org_name=ko&amp;unclassified=%20K00492%20K00493%20K01034%20K01035%20K01066%20K01077%20K01501%20K01512%20K03862%20K09474%20%20%20%20%20%20%20%20%20%20%20%20%20%20%20%20%20%20%20%20%20%20%20%20%20%20%20%20%20%20%20%20%20%20%20%20%20%20%20%20%20%20%20%20%20%20%20%20%20%20%20%20%20%20%20%20%20%20%20%20%20%20%20%20%20%20%20%20%20%20%20%20%20%20%20%20…	K00492	K00493	K01034	K01035	K01066	K01077	K01501	K01512	K03862	K09474
115	ko00130	0.000679673	0.000968465	Metabolism	Metabolism of Cofactors and Vitamins	Ubiquinone and other terpenoid-quinone biosynthesis	0	0.000679674	0.000968466	0.701805	1.4249	-1.4249	1.4249	176	3	41	29	4	http://www.genome.jp/kegg-bin/search_pathway_object?org_name=ko&amp;unclassified=%20K02548%20K02549%20K03183%20K03688%20%20%20%20%20%20%20%20%20%20%20%20%20%20%20%20%20%20%20%20%20%20%20%20%20%20%20%20%20%20%20%20%20%20%20%20%20%20%20%20%20%20%20%20%20%20%20%20%20%20%20%20%20%20%20%20%20%20%20%20%20%20%20%20%20%20%20%20%20%20%20%20%20%20%20%20%20%20%20%20%20%20%20%20%20%20%20%20%20%20%20%20%20%20…	http://www.genome.jp/kegg-bin/search_pathway_object?org_name=ko&amp;unclassified=%20K02548%20K02549%20K03183%20K03688%20%20%20%20%20%20%20%20%20%20%20%20%20%20%20%20%20%20%20%20%20%20%20%20%20%20%20%20%20%20%20%20%20%20%20%20%20%20%20%20%20%20%20%20%20%20%20%20%20%20%20%20%20%20%20%20%20%20%20%20%20%20%20%20%20%20%20%20%20%20%20%20%20%20%20%20%20%20%20%20%20%20%20%20%20%20%20%20%20%20%20%20%20%20…	K02548	K02549	K03183	K03688
160	ko04930	0.000650115	0.00134604	Human Diseases	Metabolic Diseases	Type II diabetes mellitus	0	0.000650116	0.00134604	0.482984	2.07046	-2.07046	2.07046	175	3	31	2	2	http://www.genome.jp/kegg-bin/search_pathway_object?org_name=ko&amp;unclassified=%20K00844%20K00873%20%20%20%20%20%20%20%20%20%20%20%20%20%20%20%20%20%20%20%20%20%20%20%20%20%20%20%20%20%20%20%20%20%20%20%20%20%20%20%20%20%20%20%20%20%20%20%20%20%20%20%20%20%20%20%20%20%20%20%20%20%20%20%20%20%20%20%20%20%20%20%20%20%20%20%20%20%20%20%20%20%20%20%20%20%20%20%20%20%20%20%20%20%20%20%20%20%20%20%20…	http://www.genome.jp/kegg-bin/search_pathway_object?org_name=ko&amp;unclassified=%20K00844%20K00873%20%20%20%20%20%20%20%20%20%20%20%20%20%20%20%20%20%20%20%20%20%20%20%20%20%20%20%20%20%20%20%20%20%20%20%20%20%20%20%20%20%20%20%20%20%20%20%20%20%20%20%20%20%20%20%20%20%20%20%20%20%20%20%20%20%20%20%20%20%20%20%20%20%20%20%20%20%20%20%20%20%20%20%20%20%20%20%20%20%20%20%20%20%20%20%20%20%20%20%20…	K00844	K00873
140	ko00780	0.000672151	0.00127945	Metabolism	Metabolism of Cofactors and Vitamins	Biotin metabolism	0	0.000672152	0.00127946	0.525342	1.90352	-1.90352	1.90352	174	3	10	9	6	http://www.genome.jp/kegg-bin/search_pathway_object?org_name=ko&amp;unclassified=%20K00652%20K00833%20K01012%20K01906%20K01935%20K03524%20%20%20%20%20%20%20%20%20%20%20%20%20%20%20%20%20%20%20%20%20%20%20%20%20%20%20%20%20%20%20%20%20%20%20%20%20%20%20%20%20%20%20%20%20%20%20%20%20%20%20%20%20%20%20%20%20%20%20%20%20%20%20%20%20%20%20%20%20%20%20%20%20%20%20%20%20%20%20%20%20%20%20%20%20%20%20%20…	http://www.genome.jp/kegg-bin/search_pathway_object?org_name=ko&amp;unclassified=%20K00652%20K00833%20K01012%20K01906%20K01935%20K03524%20%20%20%20%20%20%20%20%20%20%20%20%20%20%20%20%20%20%20%20%20%20%20%20%20%20%20%20%20%20%20%20%20%20%20%20%20%20%20%20%20%20%20%20%20%20%20%20%20%20%20%20%20%20%20%20%20%20%20%20%20%20%20%20%20%20%20%20%20%20%20%20%20%20%20%20%20%20%20%20%20%20%20%20%20%20%20%20…	K00652	K00833	K01012	K01906	K01935	K03524
157	ko00473	0.000836643	0.00123571	Metabolism	Metabolism of Other Amino Acids	D-Alanine metabolism	0	0.000836644	0.00123571	0.677056	1.47698	-1.47698	1.47698	173	3	5	6	2	http://www.genome.jp/kegg-bin/search_pathway_object?org_name=ko&amp;unclassified=%20K01775%20K01921%20%20%20%20%20%20%20%20%20%20%20%20%20%20%20%20%20%20%20%20%20%20%20%20%20%20%20%20%20%20%20%20%20%20%20%20%20%20%20%20%20%20%20%20%20%20%20%20%20%20%20%20%20%20%20%20%20%20%20%20%20%20%20%20%20%20%20%20%20%20%20%20%20%20%20%20%20%20%20%20%20%20%20%20%20%20%20%20%20%20%20%20%20%20%20%20%20%20%20%20…	http://www.genome.jp/kegg-bin/search_pathway_object?org_name=ko&amp;unclassified=%20K01775%20K01921%20%20%20%20%20%20%20%20%20%20%20%20%20%20%20%20%20%20%20%20%20%20%20%20%20%20%20%20%20%20%20%20%20%20%20%20%20%20%20%20%20%20%20%20%20%20%20%20%20%20%20%20%20%20%20%20%20%20%20%20%20%20%20%20%20%20%20%20%20%20%20%20%20%20%20%20%20%20%20%20%20%20%20%20%20%20%20%20%20%20%20%20%20%20%20%20%20%20%20%20…	K01775	K01921
98	ko00950	0.000835473	0.00160456	Metabolism	Biosynthesis of Other Secondary Metabolites	Isoquinoline alkaloid biosynthesis	0	0.000835474	0.00160456	0.520687	1.92054	-1.92054	1.92054	172	3	37	9	3	http://www.genome.jp/kegg-bin/search_pathway_object?org_name=ko&amp;unclassified=%20K00832%20K01592%20K11358%20%20%20%20%20%20%20%20%20%20%20%20%20%20%20%20%20%20%20%20%20%20%20%20%20%20%20%20%20%20%20%20%20%20%20%20%20%20%20%20%20%20%20%20%20%20%20%20%20%20%20%20%20%20%20%20%20%20%20%20%20%20%20%20%20%20%20%20%20%20%20%20%20%20%20%20%20%20%20%20%20%20%20%20%20%20%20%20%20%20%20%20%20%20%20%20%20…	http://www.genome.jp/kegg-bin/search_pathway_object?org_name=ko&amp;unclassified=%20K00832%20K01592%20K11358%20%20%20%20%20%20%20%20%20%20%20%20%20%20%20%20%20%20%20%20%20%20%20%20%20%20%20%20%20%20%20%20%20%20%20%20%20%20%20%20%20%20%20%20%20%20%20%20%20%20%20%20%20%20%20%20%20%20%20%20%20%20%20%20%20%20%20%20%20%20%20%20%20%20%20%20%20%20%20%20%20%20%20%20%20%20%20%20%20%20%20%20%20%20%20%20%20…	K00832	K01592	K11358
73	ko00621	0.00107821	0.000542828	Metabolism	Xenobiotics Biodegradation and Metabolism	Dioxin degradation	0	0.00107821	0.000542829	1.98629	0.503452	1.98629	-1.98629	171	3	13	13	2	http://www.genome.jp/kegg-bin/search_pathway_object?org_name=ko&amp;unclassified=%20K00132%20K00480%20%20%20%20%20%20%20%20%20%20%20%20%20%20%20%20%20%20%20%20%20%20%20%20%20%20%20%20%20%20%20%20%20%20%20%20%20%20%20%20%20%20%20%20%20%20%20%20%20%20%20%20%20%20%20%20%20%20%20%20%20%20%20%20%20%20%20%20%20%20%20%20%20%20%20%20%20%20%20%20%20%20%20%20%20%20%20%20%20%20%20%20%20%20%20%20%20%20%20%20…	http://www.genome.jp/kegg-bin/search_pathway_object?org_name=ko&amp;unclassified=%20K00132%20K00480%20%20%20%20%20%20%20%20%20%20%20%20%20%20%20%20%20%20%20%20%20%20%20%20%20%20%20%20%20%20%20%20%20%20%20%20%20%20%20%20%20%20%20%20%20%20%20%20%20%20%20%20%20%20%20%20%20%20%20%20%20%20%20%20%20%20%20%20%20%20%20%20%20%20%20%20%20%20%20%20%20%20%20%20%20%20%20%20%20%20%20%20%20%20%20%20%20%20%20%20…	K00132	K00480
46	ko00622	0.00107881	0.00054195	Metabolism	Xenobiotics Biodegradation and Metabolism	Xylene degradation	0	0.00107881	0.000541951	1.99061	0.502359	1.99061	-1.99061	170	3	20	17	1	http://www.genome.jp/kegg-bin/search_pathway_object?org_name=ko&amp;unclassified=%20K00132%20%20%20%20%20%20%20%20%20%20%20%20%20%20%20%20%20%20%20%20%20%20%20%20%20%20%20%20%20%20%20%20%20%20%20%20%20%20%20%20%20%20%20%20%20%20%20%20%20%20%20%20%20%20%20%20%20%20%20%20%20%20%20%20%20%20%20%20%20%20%20%20%20%20%20%20%20%20%20%20%20%20%20%20%20%20%20%20%20%20%20%20%20%20%20%20%20%20%20%20%20%20%20…	http://www.genome.jp/kegg-bin/search_pathway_object?org_name=ko&amp;unclassified=%20K00132%20%20%20%20%20%20%20%20%20%20%20%20%20%20%20%20%20%20%20%20%20%20%20%20%20%20%20%20%20%20%20%20%20%20%20%20%20%20%20%20%20%20%20%20%20%20%20%20%20%20%20%20%20%20%20%20%20%20%20%20%20%20%20%20%20%20%20%20%20%20%20%20%20%20%20%20%20%20%20%20%20%20%20%20%20%20%20%20%20%20%20%20%20%20%20%20%20%20%20%20%20%20%20…	K00132
177	ko04142	0.00114661	0.000466445	Cellular Processes	Transport and Catabolism	Lysosome	0	0.00114661	0.000466446	2.45818	0.406805	2.45818	-2.45819	169	3	99	18	5	http://www.genome.jp/kegg-bin/search_pathway_object?org_name=ko&amp;unclassified=%20K01134%20K01186%20K01195%20K01201%20K12373%20%20%20%20%20%20%20%20%20%20%20%20%20%20%20%20%20%20%20%20%20%20%20%20%20%20%20%20%20%20%20%20%20%20%20%20%20%20%20%20%20%20%20%20%20%20%20%20%20%20%20%20%20%20%20%20%20%20%20%20%20%20%20%20%20%20%20%20%20%20%20%20%20%20%20%20%20%20%20%20%20%20%20%20%20%20%20%20%20%20%20…	http://www.genome.jp/kegg-bin/search_pathway_object?org_name=ko&amp;unclassified=%20K01134%20K01186%20K01195%20K01201%20K12373%20%20%20%20%20%20%20%20%20%20%20%20%20%20%20%20%20%20%20%20%20%20%20%20%20%20%20%20%20%20%20%20%20%20%20%20%20%20%20%20%20%20%20%20%20%20%20%20%20%20%20%20%20%20%20%20%20%20%20%20%20%20%20%20%20%20%20%20%20%20%20%20%20%20%20%20%20%20%20%20%20%20%20%20%20%20%20%20%20%20%20…	K01134	K01186	K01195	K01201	K12373
176	ko00531	0.00103578	0.000413406	Metabolism	Glycan Biosynthesis and Metabolism	Glycosaminoglycan degradation	0	0.00103578	0.000413407	2.50547	0.399127	2.50547	-2.50547	168	3	14	10	2	http://www.genome.jp/kegg-bin/search_pathway_object?org_name=ko&amp;unclassified=%20K01195%20K12373%20%20%20%20%20%20%20%20%20%20%20%20%20%20%20%20%20%20%20%20%20%20%20%20%20%20%20%20%20%20%20%20%20%20%20%20%20%20%20%20%20%20%20%20%20%20%20%20%20%20%20%20%20%20%20%20%20%20%20%20%20%20%20%20%20%20%20%20%20%20%20%20%20%20%20%20%20%20%20%20%20%20%20%20%20%20%20%20%20%20%20%20%20%20%20%20%20%20%20%20…	http://www.genome.jp/kegg-bin/search_pathway_object?org_name=ko&amp;unclassified=%20K01195%20K12373%20%20%20%20%20%20%20%20%20%20%20%20%20%20%20%20%20%20%20%20%20%20%20%20%20%20%20%20%20%20%20%20%20%20%20%20%20%20%20%20%20%20%20%20%20%20%20%20%20%20%20%20%20%20%20%20%20%20%20%20%20%20%20%20%20%20%20%20%20%20%20%20%20%20%20%20%20%20%20%20%20%20%20%20%20%20%20%20%20%20%20%20%20%20%20%20%20%20%20%20…	K01195	K12373
133	ko02030	0.00138963	0.000627676	Cellular Processes	Cell Motility	Bacterial chemotaxis	0	0.00138963	0.000627677	2.21393	0.451685	2.21393	-2.21393	167	3	26	26	13	http://www.genome.jp/kegg-bin/search_pathway_object?org_name=ko&amp;unclassified=%20K00575%20K02410%20K02416%20K02417%20K02556%20K03406%20K03407%20K03409%20K03411%20K03412%20K03413%20K03415%20K10108%20%20%20%20%20%20%20%20%20%20%20%20%20%20%20%20%20%20%20%20%20%20%20%20%20%20%20%20%20%20%20%20%20%20%20%20%20%20%20%20%20%20%20%20%20%20%20%20%20%20%20%20%20%20%20%20%20%20%20%20%20%20%20%20%20%20%20…	http://www.genome.jp/kegg-bin/search_pathway_object?org_name=ko&amp;unclassified=%20K00575%20K02410%20K02416%20K02417%20K02556%20K03406%20K03407%20K03409%20K03411%20K03412%20K03413%20K03415%20K10108%20%20%20%20%20%20%20%20%20%20%20%20%20%20%20%20%20%20%20%20%20%20%20%20%20%20%20%20%20%20%20%20%20%20%20%20%20%20%20%20%20%20%20%20%20%20%20%20%20%20%20%20%20%20%20%20%20%20%20%20%20%20%20%20%20%20%20…	K00575	K02410	K02416	K02417	K02556	K03406	K03407	K03409	K03411	K03412	K03413	K03415	K10108
231	ko02040	0.00144949	0.00042463	Cellular Processes	Cell Motility	Flagellar assembly	1	0.00144949	0.000424631	3.41354	0.292951	3.41354	-3.41355	166	3	41	40	26	http://www.genome.jp/kegg-bin/search_pathway_object?org_name=ko&amp;unclassified=%20K02387%20K02388%20K02389%20K02390%20K02392%20K02396%20K02397%20K02400%20K02401%20K02403%20K02406%20K02407%20K02408%20K02409%20K02410%20K02412%20K02413%20K02414%20K02416%20K02417%20K02419%20K02420%20K02421%20K02422%20K02556%20K04562%20%20%20%20%20%20%20%20%20%20%20%20%20%20%20%20%20%20%20%20%20%20%20%20%20%20%20%20…	http://www.genome.jp/kegg-bin/search_pathway_object?org_name=ko&amp;unclassified=%20K02387%20K02388%20K02389%20K02390%20K02392%20K02396%20K02397%20K02400%20K02401%20K02403%20K02406%20K02407%20K02408%20K02409%20K02410%20K02412%20K02413%20K02414%20K02416%20	K02387	K02388	K02389	K02390	K02392	K02396	K02397	K02400	K02401	K02403	K02406	K02407	K02408	K02409	K02410	K02412	K02413	K02414	K02416	K02417	K02419	K02420	K02421	K02422	K02556	K04562
303	ko00604	0.000770694	0.000276021	Metabolism	Glycan Biosynthesis and Metabolism	Glycosphingolipid biosynthesis - ganglio series	0	0.000770695	0.000276022	2.79215	0.358147	2.79215	-2.79216	165	3	14	1	1	http://www.genome.jp/kegg-bin/search_pathway_object?org_name=ko&amp;unclassified=%20K12373%20%20%20%20%20%20%20%20%20%20%20%20%20%20%20%20%20%20%20%20%20%20%20%20%20%20%20%20%20%20%20%20%20%20%20%20%20%20%20%20%20%20%20%20%20%20%20%20%20%20%20%20%20%20%20%20%20%20%20%20%20%20%20%20%20%20%20%20%20%20%20%20%20%20%20%20%20%20%20%20%20%20%20%20%20%20%20%20%20%20%20%20%20%20%20%20%20%20%20%20%20%20%20…	http://www.genome.jp/kegg-bin/search_pathway_object?org_name=ko&amp;unclassified=%20K12373%20%20%20%20%20%20%20%20%20%20%20%20%20%20%20%20%20%20%20%20%20%20%20%20%20%20%20%20%20%20%20%20%20%20%20%20%20%20%20%20%20%20%20%20%20%20%20%20%20%20%20%20%20%20%20%20%20%20%20%20%20%20%20%20%20%20%20%20%20%20%20%20%20%20%20%20%20%20%20%20%20%20%20%20%20%20%20%20%20%20%20%20%20%20%20%20%20%20%20%20%20%20%20…	K12373
78	ko00633	0.00068177	0.000329314	Metabolism	Xenobiotics Biodegradation and Metabolism	Nitrotoluene degradation	0	0.000681771	0.000329315	2.07027	0.483028	2.07027	-2.07028	164	3	22	22	8	http://www.genome.jp/kegg-bin/search_pathway_object?org_name=ko&amp;unclassified=%20K00169%20K00170%20K00172%20K00194%20K00197%20K00198%20K11180%20K11181%20%20%20%20%20%20%20%20%20%20%20%20%20%20%20%20%20%20%20%20%20%20%20%20%20%20%20%20%20%20%20%20%20%20%20%20%20%20%20%20%20%20%20%20%20%20%20%20%20%20%20%20%20%20%20%20%20%20%20%20%20%20%20%20%20%20%20%20%20%20%20%20%20%20%20%20%20%20%20%20%20%20…	http://www.genome.jp/kegg-bin/search_pathway_object?org_name=ko&amp;unclassified=%20K00169%20K00170%20K00172%20K00194%20K00197%20K00198%20K11180%20K11181%20%20%20%20%20%20%20%20%20%20%20%20%20%20%20%20%20%20%20%20%20%20%20%20%20%20%20%20%20%20%20%20%20%20%20%20%20%20%20%20%20%20%20%20%20%20%20%20%20%20%20%20%20%20%20%20%20%20%20%20%20%20%20%20%20%20%20%20%20%20%20%20%20%20%20%20%20%20%20%20%20%20…	K00169	K00170	K00172	K00194	K00197	K00198	K11180	K11181
220	ko00253	0.000952774	0.000261086	Metabolism	Metabolism of Terpenoids and Polyketides	Tetracycline biosynthesis	0	0.000952775	0.000261087	3.64926	0.274028	3.64926	-3.64927	163	3	18	7	3	http://www.genome.jp/kegg-bin/search_pathway_object?org_name=ko&amp;unclassified=%20K01962%20K01962,ko:K01963%20K01963%20%20%20%20%20%20%20%20%20%20%20%20%20%20%20%20%20%20%20%20%20%20%20%20%20%20%20%20%20%20%20%20%20%20%20%20%20%20%20%20%20%20%20%20%20%20%20%20%20%20%20%20%20%20%20%20%20%20%20%20%20%20%20%20%20%20%20%20%20%20%20%20%20%20%20%20%20%20%20%20%20%20%20%20%20%20%20%20%20%20%20%20%20%2…	http://www.genome.jp/kegg-bin/search_pathway_object?org_name=ko&amp;unclassified=%20K01962%20K01962,ko:K01963%20K01963%20%20%20%20%20%20%20%20%20%20%20%20%20%20%20%20%20%20%20%20%20%20%20%20%20%20%20%20%20%20%20%20%20%20%20%20%20%20%20%20%20%20%20%20%20%20%20%20%20%20%20%20%20%20%20%20%20%20%20%20%20%20%20%20%20%20%20%20%20%20%20%20%20%20%20%20%20%20%20%20%20%20%20%20%20%20%20%20%20%20%20%20%20%2…	K01962	K01962,ko:K01963	K01963
237	ko02060	0.00139845	0.00158215	Environmental Information Processing	Membrane Transport	Phosphotransferase system (PTS)	0	0.00139845	0.00158215	0.883892	1.13136	-1.13136	1.13136	162	3	75	84	19	http://www.genome.jp/kegg-bin/search_pathway_object?org_name=ko&amp;unclassified=%20K02755,ko:K02756,ko:K02757%20K02763,ko:K02764,ko:K02765%20K02768,ko:K02769,ko:K02770%20K02768,ko:K08483,ko:K11183%20K02769,ko:K02770%20K02777%20K02778,ko:K02779%20K02782,ko:K02783%20K02783%20K02784%20K02787,ko:K02788%20K02795%20K02798%20K02798,ko:K02799,ko:K02800%20K02803,ko:K02804%20K02806%20K02808,ko:K02809,ko:K…	http://www.genome.jp/kegg-bin/search_pathway_object?org_name=ko&amp;unclassified=%20K02755,ko:K02756,ko:K02757%20K02763,ko:K02764,ko:K02765%20K02768,ko:K02769,ko:K02770%20K02768,ko:K08483,ko:K11183%20K02769,ko:K02770%20K02777%20K02778,ko:K02779%20K02782,ko:K02783%20K02783%20K02784%20K02787,ko:K02788%20K02795%20K02798%20K02798,ko:K02799,ko:K02800%20K02803,ko:K02804%20K02806%20K02808,ko:K02809,ko:K…	K02755,ko:K02756,ko:K02757	K02763,ko:K02764,ko:K02765	K02768,ko:K02769,ko:K02770	K02768,ko:K08483,ko:K11183	K02769,ko:K02770	K02777	K02778,ko:K02779	K02782,ko:K02783	K02783	K02784	K02787,ko:K02788	K02795	K02798	K02798,ko:K02799,ko:K02800	K02803,ko:K02804	K02806	K02808,ko:K02809,ko:K02810	K02809,ko:K02810	K08483
139	ko01051	0.00139542	0.00157534	Metabolism	Metabolism of Terpenoids and Polyketides	Biosynthesis of ansamycins	0	0.00139542	0.00157534	0.885787	1.12894	-1.12894	1.12894	161	3	2	2	1	http://www.genome.jp/kegg-bin/search_pathway_object?org_name=ko&amp;unclassified=%20K00615%20%20%20%20%20%20%20%20%20%20%20%20%20%20%20%20%20%20%20%20%20%20%20%20%20%20%20%20%20%20%20%20%20%20%20%20%20%20%20%20%20%20%20%20%20%20%20%20%20%20%20%20%20%20%20%20%20%20%20%20%20%20%20%20%20%20%20%20%20%20%20%20%20%20%20%20%20%20%20%20%20%20%20%20%20%20%20%20%20%20%20%20%20%20%20%20%20%20%20%20%20%20%20…	http://www.genome.jp/kegg-bin/search_pathway_object?org_name=ko&amp;unclassified=%20K00615%20%20%20%20%20%20%20%20%20%20%20%20%20%20%20%20%20%20%20%20%20%20%20%20%20%20%20%20%20%20%20%20%20%20%20%20%20%20%20%20%20%20%20%20%20%20%20%20%20%20%20%20%20%20%20%20%20%20%20%20%20%20%20%20%20%20%20%20%20%20%20%20%20%20%20%20%20%20%20%20%20%20%20%20%20%20%20%20%20%20%20%20%20%20%20%20%20%20%20%20%20%20%20…	K00615
38	ko04146	0.00137141	0.00151318	Cellular Processes	Transport and Catabolism	Peroxisome	0	0.00137141	0.00151318	0.906311	1.10337	-1.10337	1.10337	160	3	70	19	6	http://www.genome.jp/kegg-bin/search_pathway_object?org_name=ko&amp;unclassified=%20K00830%20K01640%20K01897%20K03426%20K03781%20K04564%20%20%20%20%20%20%20%20%20%20%20%20%20%20%20%20%20%20%20%20%20%20%20%20%20%20%20%20%20%20%20%20%20%20%20%20%20%20%20%20%20%20%20%20%20%20%20%20%20%20%20%20%20%20%20%20%20%20%20%20%20%20%20%20%20%20%20%20%20%20%20%20%20%20%20%20%20%20%20%20%20%20%20%20%20%20%20%20…	http://www.genome.jp/kegg-bin/search_pathway_object?org_name=ko&amp;unclassified=%20K00830%20K01640%20K01897%20K03426%20K03781%20K04564%20%20%20%20%20%20%20%20%20%20%20%20%20%20%20%20%20%20%20%20%20%20%20%20%20%20%20%20%20%20%20%20%20%20%20%20%20%20%20%20%20%20%20%20%20%20%20%20%20%20%20%20%20%20%20%20%20%20%20%20%20%20%20%20%20%20%20%20%20%20%20%20%20%20%20%20%20%20%20%20%20%20%20%20%20%20%20%20…	K00830	K01640	K01897	K03426	K03781	K04564
92	ko00430	0.00145769	0.00174193	Metabolism	Metabolism of Other Amino Acids	Taurine and hypotaurine metabolism	0	0.00145769	0.00174193	0.836827	1.19499	-1.19499	1.19499	159	3	16	12	5	http://www.genome.jp/kegg-bin/search_pathway_object?org_name=ko&amp;unclassified=%20K00625%20K00681%20K00925%20K03852%20K13788%20%20%20%20%20%20%20%20%20%20%20%20%20%20%20%20%20%20%20%20%20%20%20%20%20%20%20%20%20%20%20%20%20%20%20%20%20%20%20%20%20%20%20%20%20%20%20%20%20%20%20%20%20%20%20%20%20%20%20%20%20%20%20%20%20%20%20%20%20%20%20%20%20%20%20%20%20%20%20%20%20%20%20%20%20%20%20%20%20%20%20…	http://www.genome.jp/kegg-bin/search_pathway_object?org_name=ko&amp;unclassified=%20K00625%20K00681%20K00925%20K03852%20K13788%20%20%20%20%20%20%20%20%20%20%20%20%20%20%20%20%20%20%20%20%20%20%20%20%20%20%20%20%20%20%20%20%20%20%20%20%20%20%20%20%20%20%20%20%20%20%20%20%20%20%20%20%20%20%20%20%20%20%20%20%20%20%20%20%20%20%20%20%20%20%20%20%20%20%20%20%20%20%20%20%20%20%20%20%20%20%20%20%20%20%20…	K00625	K00681	K00925	K03852	K13788
94	ko00471	0.0014328	0.00164843	Metabolism	Metabolism of Other Amino Acids	D-Glutamine and D-glutamate metabolism	0	0.0014328	0.00164843	0.869189	1.1505	-1.1505	1.1505	158	3	6	7	4	http://www.genome.jp/kegg-bin/search_pathway_object?org_name=ko&amp;unclassified=%20K00261%20K01776%20K01924%20K01925%20%20%20%20%20%20%20%20%20%20%20%20%20%20%20%20%20%20%20%20%20%20%20%20%20%20%20%20%20%20%20%20%20%20%20%20%20%20%20%20%20%20%20%20%20%20%20%20%20%20%20%20%20%20%20%20%20%20%20%20%20%20%20%20%20%20%20%20%20%20%20%20%20%20%20%20%20%20%20%20%20%20%20%20%20%20%20%20%20%20%20%20%20%20…	http://www.genome.jp/kegg-bin/search_pathway_object?org_name=ko&amp;unclassified=%20K00261%20K01776%20K01924%20K01925%20%20%20%20%20%20%20%20%20%20%20%20%20%20%20%20%20%20%20%20%20%20%20%20%20%20%20%20%20%20%20%20%20%20%20%20%20%20%20%20%20%20%20%20%20%20%20%20%20%20%20%20%20%20%20%20%20%20%20%20%20%20%20%20%20%20%20%20%20%20%20%20%20%20%20%20%20%20%20%20%20%20%20%20%20%20%20%20%20%20%20%20%20%20…	K00261	K01776	K01924	K01925
53	ko00362	0.00163817	0.00164922	Metabolism	Xenobiotics Biodegradation and Metabolism	Benzoate degradation	0	0.00163817	0.00164922	0.993297	1.00675	-1.00675	1.00675	157	3	76	68	11	http://www.genome.jp/kegg-bin/search_pathway_object?org_name=ko&amp;unclassified=%20K00074%20K00100,ko:K01726%20K00132%20K00626%20K01031%20K01032%20K01607%20K01615%20K01726%20K01826%20K03381%20%20%20%20%20%20%20%20%20%20%20%20%20%20%20%20%20%20%20%20%20%20%20%20%20%20%20%20%20%20%20%20%20%20%20%20%20%20%20%20%20%20%20%20%20%20%20%20%20%20%20%20%20%20%20%20%20%20%20%20%20%20%20%20%20%20%20%20%20%2…	http://www.genome.jp/kegg-bin/search_pathway_object?org_name=ko&amp;unclassified=%20K00074%20K00100,ko:K01726%20K00132%20K00626%20K01031%20K01032%20K01607%20K01615%20K01726%20K01826%20K03381%20%20%20%20%20%20%20%20%20%20%20%20%20%20%20%20%20%20%20%20%20%20%20%20%20%20%20%20%20%20%20%20%20%20%20%20%20%20%20%20%20%20%20%20%20%20%20%20%20%20%20%20%20%20%20%20%20%20%20%20%20%20%20%20%20%20%20%20%20%2…	K00074	K00100,ko:K01726	K00132	K00626	K01031	K01032	K01607	K01615	K01726	K01826	K03381
72	ko00410	0.00124634	0.00172154	Metabolism	Metabolism of Other Amino Acids	beta-Alanine metabolism	0	0.00124634	0.00172154	0.723968	1.38128	-1.38128	1.38128	156	3	34	24	8	http://www.genome.jp/kegg-bin/search_pathway_object?org_name=ko&amp;unclassified=%20K00128%20K00249%20K00797%20K00823%20K01270%20K01464%20K01918%20K07250%20%20%20%20%20%20%20%20%20%20%20%20%20%20%20%20%20%20%20%20%20%20%20%20%20%20%20%20%20%20%20%20%20%20%20%20%20%20%20%20%20%20%20%20%20%20%20%20%20%20%20%20%20%20%20%20%20%20%20%20%20%20%20%20%20%20%20%20%20%20%20%20%20%20%20%20%20%20%20%20%20%20…	http://www.genome.jp/kegg-bin/search_pathway_object?org_name=ko&amp;unclassified=%20K00128%20K00249%20K00797%20K00823%20K01270%20K01464%20K01918%20K07250%20%20%20%20%20%20%20%20%20%20%20%20%20%20%20%20%20%20%20%20%20%20%20%20%20%20%20%20%20%20%20%20%20%20%20%20%20%20%20%20%20%20%20%20%20%20%20%20%20%20%20%20%20%20%20%20%20%20%20%20%20%20%20%20%20%20%20%20%20%20%20%20%20%20%20%20%20%20%20%20%20%20…	K00128	K00249	K00797	K00823	K01270	K01464	K01918	K07250
155	ko01006	0.00121555	0.00166683	Metabolism	Metabolism of Terpenoids and Polyketides	Prenyltransferases	0	0.00121555	0.00166683	0.729258	1.37126	-1.37126	1.37126	155	3	45	20	8	http://www.genome.jp/kegg-bin/search_pathway_object?org_name=ko&amp;unclassified=%20K00791%20K00795%20K00805%20K00806%20K02548%20K12503%20K13787%20K13789%20%20%20%20%20%20%20%20%20%20%20%20%20%20%20%20%20%20%20%20%20%20%20%20%20%20%20%20%20%20%20%20%20%20%20%20%20%20%20%20%20%20%20%20%20%20%20%20%20%20%20%20%20%20%20%20%20%20%20%20%20%20%20%20%20%20%20%20%20%20%20%20%20%20%20%20%20%20%20%20%20%20…	http://www.genome.jp/kegg-bin/search_pathway_object?org_name=ko&amp;unclassified=%20K00791%20K00795%20K00805%20K00806%20K02548%20K12503%20K13787%20K13789%20%20%20%20%20%20%20%20%20%20%20%20%20%20%20%20%20%20%20%20%20%20%20%20%20%20%20%20%20%20%20%20%20%20%20%20%20%20%20%20%20%20%20%20%20%20%20%20%20%20%20%20%20%20%20%20%20%20%20%20%20%20%20%20%20%20%20%20%20%20%20%20%20%20%20%20%20%20%20%20%20%20…	K00791	K00795	K00805	K00806	K02548	K12503	K13787	K13789
55	ko00740	0.00113601	0.00167426	Metabolism	Metabolism of Cofactors and Vitamins	Riboflavin metabolism	0	0.00113601	0.00167426	0.678515	1.47381	-1.47381	1.47381	154	3	31	22	8	http://www.genome.jp/kegg-bin/search_pathway_object?org_name=ko&amp;unclassified=%20K00793%20K00794%20K02858%20K09474%20K11752%20K11753%20K14652%20K14654%20%20%20%20%20%20%20%20%20%20%20%20%20%20%20%20%20%20%20%20%20%20%20%20%20%20%20%20%20%20%20%20%20%20%20%20%20%20%20%20%20%20%20%20%20%20%20%20%20%20%20%20%20%20%20%20%20%20%20%20%20%20%20%20%20%20%20%20%20%20%20%20%20%20%20%20%20%20%20%20%20%20…	http://www.genome.jp/kegg-bin/search_pathway_object?org_name=ko&amp;unclassified=%20K00793%20K00794%20K02858%20K09474%20K11752%20K11753%20K14652%20K14654%20%20%20%20%20%20%20%20%20%20%20%20%20%20%20%20%20%20%20%20%20%20%20%20%20%20%20%20%20%20%20%20%20%20%20%20%20%20%20%20%20%20%20%20%20%20%20%20%20%20%20%20%20%20%20%20%20%20%20%20%20%20%20%20%20%20%20%20%20%20%20%20%20%20%20%20%20%20%20%20%20%20…	K00793	K00794	K02858	K09474	K11752	K11753	K14652	K14654
135	ko00940	0.00134309	0.0019149	Metabolism	Biosynthesis of Other Secondary Metabolites	Phenylpropanoid biosynthesis	0	0.0013431	0.0019149	0.701391	1.42574	-1.42574	1.42574	153	3	25	8	2	http://www.genome.jp/kegg-bin/search_pathway_object?org_name=ko&amp;unclassified=%20K01188%20K05349%20%20%20%20%20%20%20%20%20%20%20%20%20%20%20%20%20%20%20%20%20%20%20%20%20%20%20%20%20%20%20%20%20%20%20%20%20%20%20%20%20%20%20%20%20%20%20%20%20%20%20%20%20%20%20%20%20%20%20%20%20%20%20%20%20%20%20%20%20%20%20%20%20%20%20%20%20%20%20%20%20%20%20%20%20%20%20%20%20%20%20%20%20%20%20%20%20%20%20%20…	http://www.genome.jp/kegg-bin/search_pathway_object?org_name=ko&amp;unclassified=%20K01188%20K05349%20%20%20%20%20%20%20%20%20%20%20%20%20%20%20%20%20%20%20%20%20%20%20%20%20%20%20%20%20%20%20%20%20%20%20%20%20%20%20%20%20%20%20%20%20%20%20%20%20%20%20%20%20%20%20%20%20%20%20%20%20%20%20%20%20%20%20%20%20%20%20%20%20%20%20%20%20%20%20%20%20%20%20%20%20%20%20%20%20%20%20%20%20%20%20%20%20%20%20%20…	K01188	K05349
130	ko04122	0.00155587	0.00137944	Genetic Information Processing	Folding, Sorting and Degradation	Sulfur relay system	0	0.00155587	0.00137944	1.12789	0.886608	1.12789	-1.12789	152	3	21	17	12	http://www.genome.jp/kegg-bin/search_pathway_object?org_name=ko&amp;unclassified=%20K00566%20K03148%20K03151%20K03154%20K03635%20K03637%20K03639%20K03831%20K04085%20K07236%20K11179%20K11996%20%20%20%20%20%20%20%20%20%20%20%20%20%20%20%20%20%20%20%20%20%20%20%20%20%20%20%20%20%20%20%20%20%20%20%20%20%20%20%20%20%20%20%20%20%20%20%20%20%20%20%20%20%20%20%20%20%20%20%20%20%20%20%20%20%20%20%20%20%20…	http://www.genome.jp/kegg-bin/search_pathway_object?org_name=ko&amp;unclassified=%20K00566%20K03148%20K03151%20K03154%20K03635%20K03637%20K03639%20K03831%20K04085%20K07236%20K11179%20K11996%20%20%20%20%20%20%20%20%20%20%20%20%20%20%20%20%20%20%20%20%20%20%20%20%20%20%20%20%20%20%20%20%20%20%20%20%20%20%20%20%20%20%20%20%20%20%20%20%20%20%20%20%20%20%20%20%20%20%20%20%20%20%20%20%20%20%20%20%20%20…	K00566	K03148	K03151	K03154	K03635	K03637	K03639	K03831	K04085	K07236	K11179	K11996
5	ko00625	0.00151525	0.00133555	Metabolism	Xenobiotics Biodegradation and Metabolism	Chloroalkane and chloroalkene degradation	0	0.00151525	0.00133555	1.13455	0.881409	1.13455	-1.13455	151	3	26	22	6	http://www.genome.jp/kegg-bin/search_pathway_object?org_name=ko&amp;unclassified=%20K00001%20K00100%20K00128%20K01564%20K02588%20K13954%20%20%20%20%20%20%20%20%20%20%20%20%20%20%20%20%20%20%20%20%20%20%20%20%20%20%20%20%20%20%20%20%20%20%20%20%20%20%20%20%20%20%20%20%20%20%20%20%20%20%20%20%20%20%20%20%20%20%20%20%20%20%20%20%20%20%20%20%20%20%20%20%20%20%20%20%20%20%20%20%20%20%20%20%20%20%20%20…	http://www.genome.jp/kegg-bin/search_pathway_object?org_name=ko&amp;unclassified=%20K00001%20K00100%20K00128%20K01564%20K02588%20K13954%20%20%20%20%20%20%20%20%20%20%20%20%20%20%20%20%20%20%20%20%20%20%20%20%20%20%20%20%20%20%20%20%20%20%20%20%20%20%20%20%20%20%20%20%20%20%20%20%20%20%20%20%20%20%20%20%20%20%20%20%20%20%20%20%20%20%20%20%20%20%20%20%20%20%20%20%20%20%20%20%20%20%20%20%20%20%20%20…	K00001	K00100	K00128	K01564	K02588	K13954
89	ko03320	0.00147156	0.00126686	Organismal Systems	Endocrine System	PPAR signaling pathway	0	0.00147156	0.00126686	1.16158	0.860893	1.16158	-1.16158	150	3	55	9	3	http://www.genome.jp/kegg-bin/search_pathway_object?org_name=ko&amp;unclassified=%20K00249%20K01596%20K01897%20%20%20%20%20%20%20%20%20%20%20%20%20%20%20%20%20%20%20%20%20%20%20%20%20%20%20%20%20%20%20%20%20%20%20%20%20%20%20%20%20%20%20%20%20%20%20%20%20%20%20%20%20%20%20%20%20%20%20%20%20%20%20%20%20%20%20%20%20%20%20%20%20%20%20%20%20%20%20%20%20%20%20%20%20%20%20%20%20%20%20%20%20%20%20%20%20…	http://www.genome.jp/kegg-bin/search_pathway_object?org_name=ko&amp;unclassified=%20K00249%20K01596%20K01897%20%20%20%20%20%20%20%20%20%20%20%20%20%20%20%20%20%20%20%20%20%20%20%20%20%20%20%20%20%20%20%20%20%20%20%20%20%20%20%20%20%20%20%20%20%20%20%20%20%20%20%20%20%20%20%20%20%20%20%20%20%20%20%20%20%20%20%20%20%20%20%20%20%20%20%20%20%20%20%20%20%20%20%20%20%20%20%20%20%20%20%20%20%20%20%20%20…	K00249	K01596	K01897
213	ko04940	0.00156985	0.0012056	Human Diseases	Metabolic Diseases	Type I diabetes mellitus	0	0.00156986	0.0012056	1.30214	0.767968	1.30214	-1.30214	149	3	24	2	0	http://www.genome.jp/kegg-bin/search_pathway_object?org_name=ko&amp;unclassified=%20%20%20%20%20%20%20%20%20%20%20%20%20%20%20%20%20%20%20%20%20%20%20%20%20%20%20%20%20%20%20%20%20%20%20%20%20%20%20%20%20%20%20%20%20%20%20%20%20%20%20%20%20%20%20%20%20%20%20%20%20%20%20%20%20%20%20%20%20%20%20%20%20%20%20%20%20%20%20%20%20%20%20%20%20%20%20%20%20%20%20%20%20%20%20%20%20%20%20%20%20%20%20%20%20%20…	http://www.genome.jp/kegg-bin/search_pathway_object?org_name=ko&amp;unclassified=%20%20%20%20%20%20%20%20%20%20%20%20%20%20%20%20%20%20%20%20%20%20%20%20%20%20%20%20%20%20%20%20%20%20%20%20%20%20%20%20%20%20%20%20%20%20%20%20%20%20%20%20%20%20%20%20%20%20%20%20%20%20%20%20%20%20%20%20%20%20%20%20%20%20%20%20%20%20%20%20%20%20%20%20%20%20%20%20%20%20%20%20%20%20%20%20%20%20%20%20%20%20%20%20%20%20…
202	ko05120	0.00116828	0.00134701	Human Diseases	Infectious Diseases	Epithelial cell signaling in Helicobacter pylori infection	0	0.00116828	0.00134701	0.867313	1.15299	-1.15299	1.15299	148	3	55	4	4	http://www.genome.jp/kegg-bin/search_pathway_object?org_name=ko&amp;unclassified=%20K01428%20K03191%20K08303%20K14048%20%20%20%20%20%20%20%20%20%20%20%20%20%20%20%20%20%20%20%20%20%20%20%20%20%20%20%20%20%20%20%20%20%20%20%20%20%20%20%20%20%20%20%20%20%20%20%20%20%20%20%20%20%20%20%20%20%20%20%20%20%20%20%20%20%20%20%20%20%20%20%20%20%20%20%20%20%20%20%20%20%20%20%20%20%20%20%20%20%20%20%20%20%20…	http://www.genome.jp/kegg-bin/search_pathway_object?org_name=ko&amp;unclassified=%20K01428%20K03191%20K08303%20K14048%20%20%20%20%20%20%20%20%20%20%20%20%20%20%20%20%20%20%20%20%20%20%20%20%20%20%20%20%20%20%20%20%20%20%20%20%20%20%20%20%20%20%20%20%20%20%20%20%20%20%20%20%20%20%20%20%20%20%20%20%20%20%20%20%20%20%20%20%20%20%20%20%20%20%20%20%20%20%20%20%20%20%20%20%20%20%20%20%20%20%20%20%20%20…	K01428	K03191	K08303	K14048
71	ko00380	0.00125324	0.00125946	Metabolism	Amino Acid Metabolism	Tryptophan metabolism	0	0.00125324	0.00125946	0.995059	1.00497	-1.00497	1.00497	147	3	62	31	9	http://www.genome.jp/kegg-bin/search_pathway_object?org_name=ko&amp;unclassified=%20K00128%20K00466%20K00493%20K00626%20K01501%20K01556%20K01667%20K01867%20K03781%20%20%20%20%20%20%20%20%20%20%20%20%20%20%20%20%20%20%20%20%20%20%20%20%20%20%20%20%20%20%20%20%20%20%20%20%20%20%20%20%20%20%20%20%20%20%20%20%20%20%20%20%20%20%20%20%20%20%20%20%20%20%20%20%20%20%20%20%20%20%20%20%20%20%20%20%20%20%20…	http://www.genome.jp/kegg-bin/search_pathway_object?org_name=ko&amp;unclassified=%20K00128%20K00466%20K00493%20K00626%20K01501%20K01556%20K01667%20K01867%20K03781%20%20%20%20%20%20%20%20%20%20%20%20%20%20%20%20%20%20%20%20%20%20%20%20%20%20%20%20%20%20%20%20%20%20%20%20%20%20%20%20%20%20%20%20%20%20%20%20%20%20%20%20%20%20%20%20%20%20%20%20%20%20%20%20%20%20%20%20%20%20%20%20%20%20%20%20%20%20%20…	K00128	K00466	K00493	K00626	K01501	K01556	K01667	K01867	K03781
45	ko00623	0.00110145	0.00123025	Metabolism	Xenobiotics Biodegradation and Metabolism	Toluene degradation	0	0.00110145	0.00123025	0.895305	1.11694	-1.11694	1.11694	146	3	28	31	5	http://www.genome.jp/kegg-bin/search_pathway_object?org_name=ko&amp;unclassified=%20K00239%20K00247%20K00492%20K03381%20K07543%20%20%20%20%20%20%20%20%20%20%20%20%20%20%20%20%20%20%20%20%20%20%20%20%20%20%20%20%20%20%20%20%20%20%20%20%20%20%20%20%20%20%20%20%20%20%20%20%20%20%20%20%20%20%20%20%20%20%20%20%20%20%20%20%20%20%20%20%20%20%20%20%20%20%20%20%20%20%20%20%20%20%20%20%20%20%20%20%20%20%20…	http://www.genome.jp/kegg-bin/search_pathway_object?org_name=ko&amp;unclassified=%20K00239%20K00247%20K00492%20K03381%20K07543%20%20%20%20%20%20%20%20%20%20%20%20%20%20%20%20%20%20%20%20%20%20%20%20%20%20%20%20%20%20%20%20%20%20%20%20%20%20%20%20%20%20%20%20%20%20%20%20%20%20%20%20%20%20%20%20%20%20%20%20%20%20%20%20%20%20%20%20%20%20%20%20%20%20%20%20%20%20%20%20%20%20%20%20%20%20%20%20%20%20%20…	K00239	K00247	K00492	K03381	K07543
81	ko00401	0.00113195	0.00214519	Metabolism	Biosynthesis of Other Secondary Metabolites	Novobiocin biosynthesis	0	0.00113195	0.00214519	0.527672	1.89512	-1.89512	1.89512	145	3	40	9	4	http://www.genome.jp/kegg-bin/search_pathway_object?org_name=ko&amp;unclassified=%20K00817%20K00832%20K04517%20K11358%20%20%20%20%20%20%20%20%20%20%20%20%20%20%20%20%20%20%20%20%20%20%20%20%20%20%20%20%20%20%20%20%20%20%20%20%20%20%20%20%20%20%20%20%20%20%20%20%20%20%20%20%20%20%20%20%20%20%20%20%20%20%20%20%20%20%20%20%20%20%20%20%20%20%20%20%20%20%20%20%20%20%20%20%20%20%20%20%20%20%20%20%20%20…	http://www.genome.jp/kegg-bin/search_pathway_object?org_name=ko&amp;unclassified=%20K00817%20K00832%20K04517%20K11358%20%20%20%20%20%20%20%20%20%20%20%20%20%20%20%20%20%20%20%20%20%20%20%20%20%20%20%20%20%20%20%20%20%20%20%20%20%20%20%20%20%20%20%20%20%20%20%20%20%20%20%20%20%20%20%20%20%20%20%20%20%20%20%20%20%20%20%20%20%20%20%20%20%20%20%20%20%20%20%20%20%20%20%20%20%20%20%20%20%20%20%20%20%20…	K00817	K00832	K04517	K11358
99	ko00960	0.0010852	0.00194928	Metabolism	Biosynthesis of Other Secondary Metabolites	Tropane, piperidine and pyridine alkaloid biosynthesis	0	0.0010852	0.00194928	0.55672	1.79624	-1.79624	1.79624	144	3	23	13	4	http://www.genome.jp/kegg-bin/search_pathway_object?org_name=ko&amp;unclassified=%20K00817%20K00832%20K01066%20K11358%20%20%20%20%20%20%20%20%20%20%20%20%20%20%20%20%20%20%20%20%20%20%20%20%20%20%20%20%20%20%20%20%20%20%20%20%20%20%20%20%20%20%20%20%20%20%20%20%20%20%20%20%20%20%20%20%20%20%20%20%20%20%20%20%20%20%20%20%20%20%20%20%20%20%20%20%20%20%20%20%20%20%20%20%20%20%20%20%20%20%20%20%20%20…	http://www.genome.jp/kegg-bin/search_pathway_object?org_name=ko&amp;unclassified=%20K00817%20K00832%20K01066%20K11358%20%20%20%20%20%20%20%20%20%20%20%20%20%20%20%20%20%20%20%20%20%20%20%20%20%20%20%20%20%20%20%20%20%20%20%20%20%20%20%20%20%20%20%20%20%20%20%20%20%20%20%20%20%20%20%20%20%20%20%20%20%20%20%20%20%20%20%20%20%20%20%20%20%20%20%20%20%20%20%20%20%20%20%20%20%20%20%20%20%20%20%20%20%20…	K00817	K00832	K01066	K11358
102	ko00790	0.00119092	0.0026035	Metabolism	Metabolism of Cofactors and Vitamins	Folate biosynthesis	0	0.00119092	0.0026035	0.45743	2.18613	-2.18613	2.18613	143	3	28	26	14	http://www.genome.jp/kegg-bin/search_pathway_object?org_name=ko&amp;unclassified=%20K00287%20K00796%20K00950%20K01077%20K01495%20K01633%20K01664%20K01665%20K02619%20K03635%20K03637%20K03639%20K11754%20K13940%20%20%20%20%20%20%20%20%20%20%20%20%20%20%20%20%20%20%20%20%20%20%20%20%20%20%20%20%20%20%20%20%20%20%20%20%20%20%20%20%20%20%20%20%20%20%20%20%20%20%20%20%20%20%20%20%20%20%20%20%20%20%20%20…	http://www.genome.jp/kegg-bin/search_pathway_object?org_name=ko&amp;unclassified=%20K00287%20K00796%20K00950%20K01077%20K01495%20K01633%20K01664%20K01665%20K02619%20K03635%20K03637%20K03639%20K11754%20K13940%20%20%20%20%20%20%20%20%20%20%20%20%20%20%20%20%20%20%20%20%20%20%20%20%20%20%20%20%20%20%20%20%20%20%20%20%20%20%20%20%20%20%20%20%20%20%20%20%20%20%20%20%20%20%20%20%20%20%20%20%20%20%20%20…	K00287	K00796	K00950	K01077	K01495	K01633	K01664	K01665	K02619	K03635	K03637	K03639	K11754	K13940
153	ko03013	0.000471438	0.00031647	Genetic Information Processing	Translation	RNA transport	0	0.000471439	0.000316471	1.48968	0.671287	1.48968	-1.48968	142	3	132	16	2	http://www.genome.jp/kegg-bin/search_pathway_object?org_name=ko&amp;unclassified=%20K00974%20K03113%20%20%20%20%20%20%20%20%20%20%20%20%20%20%20%20%20%20%20%20%20%20%20%20%20%20%20%20%20%20%20%20%20%20%20%20%20%20%20%20%20%20%20%20%20%20%20%20%20%20%20%20%20%20%20%20%20%20%20%20%20%20%20%20%20%20%20%20%20%20%20%20%20%20%20%20%20%20%20%20%20%20%20%20%20%20%20%20%20%20%20%20%20%20%20%20%20%20%20%20…	http://www.genome.jp/kegg-bin/search_pathway_object?org_name=ko&amp;unclassified=%20K00974%20K03113%20%20%20%20%20%20%20%20%20%20%20%20%20%20%20%20%20%20%20%20%20%20%20%20%20%20%20%20%20%20%20%20%20%20%20%20%20%20%20%20%20%20%20%20%20%20%20%20%20%20%20%20%20%20%20%20%20%20%20%20%20%20%20%20%20%20%20%20%20%20%20%20%20%20%20%20%20%20%20%20%20%20%20%20%20%20%20%20%20%20%20%20%20%20%20%20%20%20%20%20…	K00974	K03113
101	ko00908	0.000386391	0.000385559	Metabolism	Metabolism of Terpenoids and Polyketides	Zeatin biosynthesis	0	0.000386392	0.00038556	1.00216	0.997846	1.00216	-1.00216	141	3	8	1	1	http://www.genome.jp/kegg-bin/search_pathway_object?org_name=ko&amp;unclassified=%20K00791%20%20%20%20%20%20%20%20%20%20%20%20%20%20%20%20%20%20%20%20%20%20%20%20%20%20%20%20%20%20%20%20%20%20%20%20%20%20%20%20%20%20%20%20%20%20%20%20%20%20%20%20%20%20%20%20%20%20%20%20%20%20%20%20%20%20%20%20%20%20%20%20%20%20%20%20%20%20%20%20%20%20%20%20%20%20%20%20%20%20%20%20%20%20%20%20%20%20%20%20%20%20%20…	http://www.genome.jp/kegg-bin/search_pathway_object?org_name=ko&amp;unclassified=%20K00791%20%20%20%20%20%20%20%20%20%20%20%20%20%20%20%20%20%20%20%20%20%20%20%20%20%20%20%20%20%20%20%20%20%20%20%20%20%20%20%20%20%20%20%20%20%20%20%20%20%20%20%20%20%20%20%20%20%20%20%20%20%20%20%20%20%20%20%20%20%20%20%20%20%20%20%20%20%20%20%20%20%20%20%20%20%20%20%20%20%20%20%20%20%20%20%20%20%20%20%20%20%20%20…	K00791
68	ko00624	0.00038995	0.000274351	Metabolism	Xenobiotics Biodegradation and Metabolism	Polycyclic aromatic hydrocarbon degradation	0	0.000389951	0.000274352	1.42135	0.703556	1.42135	-1.42135	140	3	34	26	4	http://www.genome.jp/kegg-bin/search_pathway_object?org_name=ko&amp;unclassified=%20K00155%20K00224%20K00480%20K00492%20%20%20%20%20%20%20%20%20%20%20%20%20%20%20%20%20%20%20%20%20%20%20%20%20%20%20%20%20%20%20%20%20%20%20%20%20%20%20%20%20%20%20%20%20%20%20%20%20%20%20%20%20%20%20%20%20%20%20%20%20%20%20%20%20%20%20%20%20%20%20%20%20%20%20%20%20%20%20%20%20%20%20%20%20%20%20%20%20%20%20%20%20%20…	http://www.genome.jp/kegg-bin/search_pathway_object?org_name=ko&amp;unclassified=%20K00155%20K00224%20K00480%20K00492%20%20%20%20%20%20%20%20%20%20%20%20%20%20%20%20%20%20%20%20%20%20%20%20%20%20%20%20%20%20%20%20%20%20%20%20%20%20%20%20%20%20%20%20%20%20%20%20%20%20%20%20%20%20%20%20%20%20%20%20%20%20%20%20%20%20%20%20%20%20%20%20%20%20%20%20%20%20%20%20%20%20%20%20%20%20%20%20%20%20%20%20%20%20…	K00155	K00224	K00480	K00492
207	ko05340	0.000334385	0.000214299	Human Diseases	Immune System Diseases	Primary immunodeficiency	0	0.000334386	0.0002143	1.56036	0.640876	1.56036	-1.56037	139	3	34	2	1	http://www.genome.jp/kegg-bin/search_pathway_object?org_name=ko&amp;unclassified=%20K03648%20%20%20%20%20%20%20%20%20%20%20%20%20%20%20%20%20%20%20%20%20%20%20%20%20%20%20%20%20%20%20%20%20%20%20%20%20%20%20%20%20%20%20%20%20%20%20%20%20%20%20%20%20%20%20%20%20%20%20%20%20%20%20%20%20%20%20%20%20%20%20%20%20%20%20%20%20%20%20%20%20%20%20%20%20%20%20%20%20%20%20%20%20%20%20%20%20%20%20%20%20%20%20…	http://www.genome.jp/kegg-bin/search_pathway_object?org_name=ko&amp;unclassified=%20K03648%20%20%20%20%20%20%20%20%20%20%20%20%20%20%20%20%20%20%20%20%20%20%20%20%20%20%20%20%20%20%20%20%20%20%20%20%20%20%20%20%20%20%20%20%20%20%20%20%20%20%20%20%20%20%20%20%20%20%20%20%20%20%20%20%20%20%20%20%20%20%20%20%20%20%20%20%20%20%20%20%20%20%20%20%20%20%20%20%20%20%20%20%20%20%20%20%20%20%20%20%20%20%20…	K03648
187	ko04974	0.000481346	0.000546227	Organismal Systems	Digestive System	Protein digestion and absorption	0	0.000481347	0.000546228	0.88122	1.13479	-1.13479	1.13479	138	3	49	6	1	http://www.genome.jp/kegg-bin/search_pathway_object?org_name=ko&amp;unclassified=%20K01278%20%20%20%20%20%20%20%20%20%20%20%20%20%20%20%20%20%20%20%20%20%20%20%20%20%20%20%20%20%20%20%20%20%20%20%20%20%20%20%20%20%20%20%20%20%20%20%20%20%20%20%20%20%20%20%20%20%20%20%20%20%20%20%20%20%20%20%20%20%20%20%20%20%20%20%20%20%20%20%20%20%20%20%20%20%20%20%20%20%20%20%20%20%20%20%20%20%20%20%20%20%20%20…	http://www.genome.jp/kegg-bin/search_pathway_object?org_name=ko&amp;unclassified=%20K01278%20%20%20%20%20%20%20%20%20%20%20%20%20%20%20%20%20%20%20%20%20%20%20%20%20%20%20%20%20%20%20%20%20%20%20%20%20%20%20%20%20%20%20%20%20%20%20%20%20%20%20%20%20%20%20%20%20%20%20%20%20%20%20%20%20%20%20%20%20%20%20%20%20%20%20%20%20%20%20%20%20%20%20%20%20%20%20%20%20%20%20%20%20%20%20%20%20%20%20%20%20%20%20…	K01278
49	ko01040	0.000528849	0.000454857	Metabolism	Lipid Metabolism	Biosynthesis of unsaturated fatty acids	0	0.00052885	0.000454858	1.16267	0.860089	1.16267	-1.16267	137	3	29	15	3	http://www.genome.jp/kegg-bin/search_pathway_object?org_name=ko&amp;unclassified=%20K10804%20K10805%20K10806%20%20%20%20%20%20%20%20%20%20%20%20%20%20%20%20%20%20%20%20%20%20%20%20%20%20%20%20%20%20%20%20%20%20%20%20%20%20%20%20%20%20%20%20%20%20%20%20%20%20%20%20%20%20%20%20%20%20%20%20%20%20%20%20%20%20%20%20%20%20%20%20%20%20%20%20%20%20%20%20%20%20%20%20%20%20%20%20%20%20%20%20%20%20%20%20%20…	http://www.genome.jp/kegg-bin/search_pathway_object?org_name=ko&amp;unclassified=%20K10804%20K10805%20K10806%20%20%20%20%20%20%20%20%20%20%20%20%20%20%20%20%20%20%20%20%20%20%20%20%20%20%20%20%20%20%20%20%20%20%20%20%20%20%20%20%20%20%20%20%20%20%20%20%20%20%20%20%20%20%20%20%20%20%20%20%20%20%20%20%20%20%20%20%20%20%20%20%20%20%20%20%20%20%20%20%20%20%20%20%20%20%20%20%20%20%20%20%20%20%20%20%20…	K10804	K10805	K10806
29	ko00072	0.000231216	0.000378085	Metabolism	Lipid Metabolism	Synthesis and degradation of ketone bodies	0	0.000231217	0.000378086	0.611546	1.6352	-1.6352	1.6352	136	3	8	8	3	http://www.genome.jp/kegg-bin/search_pathway_object?org_name=ko&amp;unclassified=%20K00626%20K01029%20K01640%20%20%20%20%20%20%20%20%20%20%20%20%20%20%20%20%20%20%20%20%20%20%20%20%20%20%20%20%20%20%20%20%20%20%20%20%20%20%20%20%20%20%20%20%20%20%20%20%20%20%20%20%20%20%20%20%20%20%20%20%20%20%20%20%20%20%20%20%20%20%20%20%20%20%20%20%20%20%20%20%20%20%20%20%20%20%20%20%20%20%20%20%20%20%20%20%20…	http://www.genome.jp/kegg-bin/search_pathway_object?org_name=ko&amp;unclassified=%20K00626%20K01029%20K01640%20%20%20%20%20%20%20%20%20%20%20%20%20%20%20%20%20%20%20%20%20%20%20%20%20%20%20%20%20%20%20%20%20%20%20%20%20%20%20%20%20%20%20%20%20%20%20%20%20%20%20%20%20%20%20%20%20%20%20%20%20%20%20%20%20%20%20%20%20%20%20%20%20%20%20%20%20%20%20%20%20%20%20%20%20%20%20%20%20%20%20%20%20%20%20%20%20…	K00626	K01029	K01640
246	ko03008	0.000206997	0.000395134	Genetic Information Processing	Translation	Ribosome biogenesis in eukaryotes	0	0.000206998	0.000395135	0.523866	1.90888	-1.90888	1.90889	135	3	82	15	2	http://www.genome.jp/kegg-bin/search_pathway_object?org_name=ko&amp;unclassified=%20K03685%20K13288%20%20%20%20%20%20%20%20%20%20%20%20%20%20%20%20%20%20%20%20%20%20%20%20%20%20%20%20%20%20%20%20%20%20%20%20%20%20%20%20%20%20%20%20%20%20%20%20%20%20%20%20%20%20%20%20%20%20%20%20%20%20%20%20%20%20%20%20%20%20%20%20%20%20%20%20%20%20%20%20%20%20%20%20%20%20%20%20%20%20%20%20%20%20%20%20%20%20%20%20…	http://www.genome.jp/kegg-bin/search_pathway_object?org_name=ko&amp;unclassified=%20K03685%20K13288%20%20%20%20%20%20%20%20%20%20%20%20%20%20%20%20%20%20%20%20%20%20%20%20%20%20%20%20%20%20%20%20%20%20%20%20%20%20%20%20%20%20%20%20%20%20%20%20%20%20%20%20%20%20%20%20%20%20%20%20%20%20%20%20%20%20%20%20%20%20%20%20%20%20%20%20%20%20%20%20%20%20%20%20%20%20%20%20%20%20%20%20%20%20%20%20%20%20%20%20…	K03685	K13288
164	ko04070	0.00029446	0.00037693	Environmental Information Processing	Signal Transduction	Phosphatidylinositol signaling system	0	0.000294461	0.000376931	0.781206	1.28007	-1.28007	1.28007	134	3	38	4	2	http://www.genome.jp/kegg-bin/search_pathway_object?org_name=ko&amp;unclassified=%20K00981%20K01092%20%20%20%20%20%20%20%20%20%20%20%20%20%20%20%20%20%20%20%20%20%20%20%20%20%20%20%20%20%20%20%20%20%20%20%20%20%20%20%20%20%20%20%20%20%20%20%20%20%20%20%20%20%20%20%20%20%20%20%20%20%20%20%20%20%20%20%20%20%20%20%20%20%20%20%20%20%20%20%20%20%20%20%20%20%20%20%20%20%20%20%20%20%20%20%20%20%20%20%20…	http://www.genome.jp/kegg-bin/search_pathway_object?org_name=ko&amp;unclassified=%20K00981%20K01092%20%20%20%20%20%20%20%20%20%20%20%20%20%20%20%20%20%20%20%20%20%20%20%20%20%20%20%20%20%20%20%20%20%20%20%20%20%20%20%20%20%20%20%20%20%20%20%20%20%20%20%20%20%20%20%20%20%20%20%20%20%20%20%20%20%20%20%20%20%20%20%20%20%20%20%20%20%20%20%20%20%20%20%20%20%20%20%20%20%20%20%20%20%20%20%20%20%20%20%20…	K00981	K01092
149	ko00510	0.000237837	0.000302194	Metabolism	Glycan Biosynthesis and Metabolism	N-Glycan biosynthesis	0	0.000237838	0.000302195	0.787037	1.27059	-1.27059	1.27059	133	3	44	7	2	http://www.genome.jp/kegg-bin/search_pathway_object?org_name=ko&amp;unclassified=%20K00721%20K07151%20%20%20%20%20%20%20%20%20%20%20%20%20%20%20%20%20%20%20%20%20%20%20%20%20%20%20%20%20%20%20%20%20%20%20%20%20%20%20%20%20%20%20%20%20%20%20%20%20%20%20%20%20%20%20%20%20%20%20%20%20%20%20%20%20%20%20%20%20%20%20%20%20%20%20%20%20%20%20%20%20%20%20%20%20%20%20%20%20%20%20%20%20%20%20%20%20%20%20%20…	http://www.genome.jp/kegg-bin/search_pathway_object?org_name=ko&amp;unclassified=%20K00721%20K07151%20%20%20%20%20%20%20%20%20%20%20%20%20%20%20%20%20%20%20%20%20%20%20%20%20%20%20%20%20%20%20%20%20%20%20%20%20%20%20%20%20%20%20%20%20%20%20%20%20%20%20%20%20%20%20%20%20%20%20%20%20%20%20%20%20%20%20%20%20%20%20%20%20%20%20%20%20%20%20%20%20%20%20%20%20%20%20%20%20%20%20%20%20%20%20%20%20%20%20%20…	K00721	K07151
113	ko00590	0.000128325	0.0004417	Metabolism	Lipid Metabolism	Arachidonic acid metabolism	0	0.000128326	0.000441701	0.290526	3.44203	-3.44203	3.44205	132	3	29	5	2	http://www.genome.jp/kegg-bin/search_pathway_object?org_name=ko&amp;unclassified=%20K00432%20K00681%20%20%20%20%20%20%20%20%20%20%20%20%20%20%20%20%20%20%20%20%20%20%20%20%20%20%20%20%20%20%20%20%20%20%20%20%20%20%20%20%20%20%20%20%20%20%20%20%20%20%20%20%20%20%20%20%20%20%20%20%20%20%20%20%20%20%20%20%20%20%20%20%20%20%20%20%20%20%20%20%20%20%20%20%20%20%20%20%20%20%20%20%20%20%20%20%20%20%20%20…	http://www.genome.jp/kegg-bin/search_pathway_object?org_name=ko&amp;unclassified=%20K00432%20K00681%20%20%20%20%20%20%20%20%20%20%20%20%20%20%20%20%20%20%20%20%20%20%20%20%20%20%20%20%20%20%20%20%20%20%20%20%20%20%20%20%20%20%20%20%20%20%20%20%20%20%20%20%20%20%20%20%20%20%20%20%20%20%20%20%20%20%20%20%20%20%20%20%20%20%20%20%20%20%20%20%20%20%20%20%20%20%20%20%20%20%20%20%20%20%20%20%20%20%20%20…	K00432	K00681
159	ko04973	3.23302e-05	0.000417885	Organismal Systems	Digestive System	Carbohydrate digestion and absorption	0	3.23312e-05	0.000417886	0.0773684	12.9252	-12.9252	12.9255	131	3	19	4	1	http://www.genome.jp/kegg-bin/search_pathway_object?org_name=ko&amp;unclassified=%20K00844%20%20%20%20%20%20%20%20%20%20%20%20%20%20%20%20%20%20%20%20%20%20%20%20%20%20%20%20%20%20%20%20%20%20%20%20%20%20%20%20%20%20%20%20%20%20%20%20%20%20%20%20%20%20%20%20%20%20%20%20%20%20%20%20%20%20%20%20%20%20%20%20%20%20%20%20%20%20%20%20%20%20%20%20%20%20%20%20%20%20%20%20%20%20%20%20%20%20%20%20%20%20%20…	http://www.genome.jp/kegg-bin/search_pathway_object?org_name=ko&amp;unclassified=%20K00844%20%20%20%20%20%20%20%20%20%20%20%20%20%20%20%20%20%20%20%20%20%20%20%20%20%20%20%20%20%20%20%20%20%20%20%20%20%20%20%20%20%20%20%20%20%20%20%20%20%20%20%20%20%20%20%20%20%20%20%20%20%20%20%20%20%20%20%20%20%20%20%20%20%20%20%20%20%20%20%20%20%20%20%20%20%20%20%20%20%20%20%20%20%20%20%20%20%20%20%20%20%20%20…	K00844
158	ko00524	0.000294403	0.000616367	Metabolism	Biosynthesis of Other Secondary Metabolites	Butirosin and neomycin biosynthesis	0	0.000294404	0.000616368	0.477643	2.09361	-2.09361	2.09362	130	3	22	2	1	http://www.genome.jp/kegg-bin/search_pathway_object?org_name=ko&amp;unclassified=%20K00844%20%20%20%20%20%20%20%20%20%20%20%20%20%20%20%20%20%20%20%20%20%20%20%20%20%20%20%20%20%20%20%20%20%20%20%20%20%20%20%20%20%20%20%20%20%20%20%20%20%20%20%20%20%20%20%20%20%20%20%20%20%20%20%20%20%20%20%20%20%20%20%20%20%20%20%20%20%20%20%20%20%20%20%20%20%20%20%20%20%20%20%20%20%20%20%20%20%20%20%20%20%20%20…	http://www.genome.jp/kegg-bin/search_pathway_object?org_name=ko&amp;unclassified=%20K00844%20%20%20%20%20%20%20%20%20%20%20%20%20%20%20%20%20%20%20%20%20%20%20%20%20%20%20%20%20%20%20%20%20%20%20%20%20%20%20%20%20%20%20%20%20%20%20%20%20%20%20%20%20%20%20%20%20%20%20%20%20%20%20%20%20%20%20%20%20%20%20%20%20%20%20%20%20%20%20%20%20%20%20%20%20%20%20%20%20%20%20%20%20%20%20%20%20%20%20%20%20%20%20…	K00844
203	ko00120	0.000170526	9.73147e-05	Metabolism	Lipid Metabolism	Primary bile acid biosynthesis	0	0.000170527	9.73157e-05	1.75231	0.570675	1.75231	-1.75232	129	3	17	2	0	http://www.genome.jp/kegg-bin/search_pathway_object?org_name=ko&amp;unclassified=%20%20%20%20%20%20%20%20%20%20%20%20%20%20%20%20%20%20%20%20%20%20%20%20%20%20%20%20%20%20%20%20%20%20%20%20%20%20%20%20%20%20%20%20%20%20%20%20%20%20%20%20%20%20%20%20%20%20%20%20%20%20%20%20%20%20%20%20%20%20%20%20%20%20%20%20%20%20%20%20%20%20%20%20%20%20%20%20%20%20%20%20%20%20%20%20%20%20%20%20%20%20%20%20%20%20…	http://www.genome.jp/kegg-bin/search_pathway_object?org_name=ko&amp;unclassified=%20%20%20%20%20%20%20%20%20%20%20%20%20%20%20%20%20%20%20%20%20%20%20%20%20%20%20%20%20%20%20%20%20%20%20%20%20%20%20%20%20%20%20%20%20%20%20%20%20%20%20%20%20%20%20%20%20%20%20%20%20%20%20%20%20%20%20%20%20%20%20%20%20%20%20%20%20%20%20%20%20%20%20%20%20%20%20%20%20%20%20%20%20%20%20%20%20%20%20%20%20%20%20%20%20%20…
204	ko00121	0.000169819	9.70228e-05	Metabolism	Lipid Metabolism	Secondary bile acid biosynthesis	0	0.00016982	9.70238e-05	1.7503	0.571332	1.7503	-1.7503	128	3	1	1	0	http://www.genome.jp/kegg-bin/search_pathway_object?org_name=ko&amp;unclassified=%20%20%20%20%20%20%20%20%20%20%20%20%20%20%20%20%20%20%20%20%20%20%20%20%20%20%20%20%20%20%20%20%20%20%20%20%20%20%20%20%20%20%20%20%20%20%20%20%20%20%20%20%20%20%20%20%20%20%20%20%20%20%20%20%20%20%20%20%20%20%20%20%20%20%20%20%20%20%20%20%20%20%20%20%20%20%20%20%20%20%20%20%20%20%20%20%20%20%20%20%20%20%20%20%20%20…	http://www.genome.jp/kegg-bin/search_pathway_object?org_name=ko&amp;unclassified=%20%20%20%20%20%20%20%20%20%20%20%20%20%20%20%20%20%20%20%20%20%20%20%20%20%20%20%20%20%20%20%20%20%20%20%20%20%20%20%20%20%20%20%20%20%20%20%20%20%20%20%20%20%20%20%20%20%20%20%20%20%20%20%20%20%20%20%20%20%20%20%20%20%20%20%20%20%20%20%20%20%20%20%20%20%20%20%20%20%20%20%20%20%20%20%20%20%20%20%20%20%20%20%20%20%20…
95	ko04964	0.000164416	8.50095e-05	Organismal Systems	Excretory System	Proximal tubule bicarbonate reclamation	0	0.000164417	8.50105e-05	1.93408	0.517041	1.93408	-1.93409	127	3	12	4	2	http://www.genome.jp/kegg-bin/search_pathway_object?org_name=ko&amp;unclassified=%20K00261%20K01596%20%20%20%20%20%20%20%20%20%20%20%20%20%20%20%20%20%20%20%20%20%20%20%20%20%20%20%20%20%20%20%20%20%20%20%20%20%20%20%20%20%20%20%20%20%20%20%20%20%20%20%20%20%20%20%20%20%20%20%20%20%20%20%20%20%20%20%20%20%20%20%20%20%20%20%20%20%20%20%20%20%20%20%20%20%20%20%20%20%20%20%20%20%20%20%20%20%20%20%20…	http://www.genome.jp/kegg-bin/search_pathway_object?org_name=ko&amp;unclassified=%20K00261%20K01596%20%20%20%20%20%20%20%20%20%20%20%20%20%20%20%20%20%20%20%20%20%20%20%20%20%20%20%20%20%20%20%20%20%20%20%20%20%20%20%20%20%20%20%20%20%20%20%20%20%20%20%20%20%20%20%20%20%20%20%20%20%20%20%20%20%20%20%20%20%20%20%20%20%20%20%20%20%20%20%20%20%20%20%20%20%20%20%20%20%20%20%20%20%20%20%20%20%20%20%20…	K00261	K01596
77	ko00281	0.000154076	8.01902e-05	Metabolism	Metabolism of Terpenoids and Polyketides	Geraniol degradation	0	0.000154077	8.01912e-05	1.92137	0.520461	1.92137	-1.92138	126	3	16	17	3	http://www.genome.jp/kegg-bin/search_pathway_object?org_name=ko&amp;unclassified=%20K00155%20K00257%20K01640%20%20%20%20%20%20%20%20%20%20%20%20%20%20%20%20%20%20%20%20%20%20%20%20%20%20%20%20%20%20%20%20%20%20%20%20%20%20%20%20%20%20%20%20%20%20%20%20%20%20%20%20%20%20%20%20%20%20%20%20%20%20%20%20%20%20%20%20%20%20%20%20%20%20%20%20%20%20%20%20%20%20%20%20%20%20%20%20%20%20%20%20%20%20%20%20%20…	http://www.genome.jp/kegg-bin/search_pathway_object?org_name=ko&amp;unclassified=%20K00155%20K00257%20K01640%20%20%20%20%20%20%20%20%20%20%20%20%20%20%20%20%20%20%20%20%20%20%20%20%20%20%20%20%20%20%20%20%20%20%20%20%20%20%20%20%20%20%20%20%20%20%20%20%20%20%20%20%20%20%20%20%20%20%20%20%20%20%20%20%20%20%20%20%20%20%20%20%20%20%20%20%20%20%20%20%20%20%20%20%20%20%20%20%20%20%20%20%20%20%20%20%20…	K00155	K00257	K01640
66	ko00903	0.000165642	5.5719e-05	Metabolism	Metabolism of Terpenoids and Polyketides	Limonene and pinene degradation	0	0.000165643	5.572e-05	2.97277	0.336387	2.97277	-2.9728	125	3	21	18	5	http://www.genome.jp/kegg-bin/search_pathway_object?org_name=ko&amp;unclassified=%20K00100,ko:K01726%20K00128%20K00155%20K00492%20K01726%20%20%20%20%20%20%20%20%20%20%20%20%20%20%20%20%20%20%20%20%20%20%20%20%20%20%20%20%20%20%20%20%20%20%20%20%20%20%20%20%20%20%20%20%20%20%20%20%20%20%20%20%20%20%20%20%20%20%20%20%20%20%20%20%20%20%20%20%20%20%20%20%20%20%20%20%20%20%20%20%20%20%20%20%20%20%20%2…	http://www.genome.jp/kegg-bin/search_pathway_object?org_name=ko&amp;unclassified=%20K00100,ko:K01726%20K00128%20K00155%20K00492%20K01726%20%20%20%20%20%20%20%20%20%20%20%20%20%20%20%20%20%20%20%20%20%20%20%20%20%20%20%20%20%20%20%20%20%20%20%20%20%20%20%20%20%20%20%20%20%20%20%20%20%20%20%20%20%20%20%20%20%20%20%20%20%20%20%20%20%20%20%20%20%20%20%20%20%20%20%20%20%20%20%20%20%20%20%20%20%20%20%2…	K00100,ko:K01726	K00128	K00155	K00492	K01726
252	ko00785	0.000113337	0.000112297	Metabolism	Metabolism of Cofactors and Vitamins	Lipoic acid metabolism	0	0.000113338	0.000112298	1.00926	0.990822	1.00926	-1.00926	124	3	4	3	3	http://www.genome.jp/kegg-bin/search_pathway_object?org_name=ko&amp;unclassified=%20K03644%20K03800%20K03801%20%20%20%20%20%20%20%20%20%20%20%20%20%20%20%20%20%20%20%20%20%20%20%20%20%20%20%20%20%20%20%20%20%20%20%20%20%20%20%20%20%20%20%20%20%20%20%20%20%20%20%20%20%20%20%20%20%20%20%20%20%20%20%20%20%20%20%20%20%20%20%20%20%20%20%20%20%20%20%20%20%20%20%20%20%20%20%20%20%20%20%20%20%20%20%20%20…	http://www.genome.jp/kegg-bin/search_pathway_object?org_name=ko&amp;unclassified=%20K03644%20K03800%20K03801%20%20%20%20%20%20%20%20%20%20%20%20%20%20%20%20%20%20%20%20%20%20%20%20%20%20%20%20%20%20%20%20%20%20%20%20%20%20%20%20%20%20%20%20%20%20%20%20%20%20%20%20%20%20%20%20%20%20%20%20%20%20%20%20%20%20%20%20%20%20%20%20%20%20%20%20%20%20%20%20%20%20%20%20%20%20%20%20%20%20%20%20%20%20%20%20%20…	K03644	K03800	K03801
218	ko04011	8.56736e-05	0.00010025	Environmental Information Processing	Signal Transduction	MAPK signaling pathway - yeast	0	8.56746e-05	0.000100251	0.854598	1.17014	-1.17014	1.17014	123	3	39	1	1	http://www.genome.jp/kegg-bin/search_pathway_object?org_name=ko&amp;unclassified=%20K01759%20%20%20%20%20%20%20%20%20%20%20%20%20%20%20%20%20%20%20%20%20%20%20%20%20%20%20%20%20%20%20%20%20%20%20%20%20%20%20%20%20%20%20%20%20%20%20%20%20%20%20%20%20%20%20%20%20%20%20%20%20%20%20%20%20%20%20%20%20%20%20%20%20%20%20%20%20%20%20%20%20%20%20%20%20%20%20%20%20%20%20%20%20%20%20%20%20%20%20%20%20%20%20…	http://www.genome.jp/kegg-bin/search_pathway_object?org_name=ko&amp;unclassified=%20K01759%20%20%20%20%20%20%20%20%20%20%20%20%20%20%20%20%20%20%20%20%20%20%20%20%20%20%20%20%20%20%20%20%20%20%20%20%20%20%20%20%20%20%20%20%20%20%20%20%20%20%20%20%20%20%20%20%20%20%20%20%20%20%20%20%20%20%20%20%20%20%20%20%20%20%20%20%20%20%20%20%20%20%20%20%20%20%20%20%20%20%20%20%20%20%20%20%20%20%20%20%20%20%20…	K01759
62	ko00363	0.000246944	0.000135713	Metabolism	Xenobiotics Biodegradation and Metabolism	Bisphenol degradation	0	0.000246945	0.000135714	1.8196	0.549571	1.8196	-1.81961	122	3	12	14	5	http://www.genome.jp/kegg-bin/search_pathway_object?org_name=ko&amp;unclassified=%20K00100%20K00100,ko:K01726%20K00492%20K01066%20K01726%20%20%20%20%20%20%20%20%20%20%20%20%20%20%20%20%20%20%20%20%20%20%20%20%20%20%20%20%20%20%20%20%20%20%20%20%20%20%20%20%20%20%20%20%20%20%20%20%20%20%20%20%20%20%20%20%20%20%20%20%20%20%20%20%20%20%20%20%20%20%20%20%20%20%20%20%20%20%20%20%20%20%20%20%20%20%20%2…	http://www.genome.jp/kegg-bin/search_pathway_object?org_name=ko&amp;unclassified=%20K00100%20K00100,ko:K01726%20K00492%20K01066%20K01726%20%20%20%20%20%20%20%20%20%20%20%20%20%20%20%20%20%20%20%20%20%20%20%20%20%20%20%20%20%20%20%20%20%20%20%20%20%20%20%20%20%20%20%20%20%20%20%20%20%20%20%20%20%20%20%20%20%20%20%20%20%20%20%20%20%20%20%20%20%20%20%20%20%20%20%20%20%20%20%20%20%20%20%20%20%20%20%2…	K00100	K00100,ko:K01726	K00492	K01066	K01726
61	ko00591	0.000238949	0.000132237	Metabolism	Lipid Metabolism	Linoleic acid metabolism	0	0.00023895	0.000132238	1.80697	0.553412	1.80697	-1.80698	121	3	13	6	1	http://www.genome.jp/kegg-bin/search_pathway_object?org_name=ko&amp;unclassified=%20K00100%20%20%20%20%20%20%20%20%20%20%20%20%20%20%20%20%20%20%20%20%20%20%20%20%20%20%20%20%20%20%20%20%20%20%20%20%20%20%20%20%20%20%20%20%20%20%20%20%20%20%20%20%20%20%20%20%20%20%20%20%20%20%20%20%20%20%20%20%20%20%20%20%20%20%20%20%20%20%20%20%20%20%20%20%20%20%20%20%20%20%20%20%20%20%20%20%20%20%20%20%20%20%20…	http://www.genome.jp/kegg-bin/search_pathway_object?org_name=ko&amp;unclassified=%20K00100%20%20%20%20%20%20%20%20%20%20%20%20%20%20%20%20%20%20%20%20%20%20%20%20%20%20%20%20%20%20%20%20%20%20%20%20%20%20%20%20%20%20%20%20%20%20%20%20%20%20%20%20%20%20%20%20%20%20%20%20%20%20%20%20%20%20%20%20%20%20%20%20%20%20%20%20%20%20%20%20%20%20%20%20%20%20%20%20%20%20%20%20%20%20%20%20%20%20%20%20%20%20%20…	K00100
65	ko00440	0.000219114	0.000189608	Metabolism	Metabolism of Other Amino Acids	Phosphonate and phosphinate metabolism	0	0.000219115	0.000189609	1.15562	0.865338	1.15562	-1.15562	120	3	27	9	6	http://www.genome.jp/kegg-bin/search_pathway_object?org_name=ko&amp;unclassified=%20K01841%20K03430%20K03823%20K05306%20K06193%20K09459%20%20%20%20%20%20%20%20%20%20%20%20%20%20%20%20%20%20%20%20%20%20%20%20%20%20%20%20%20%20%20%20%20%20%20%20%20%20%20%20%20%20%20%20%20%20%20%20%20%20%20%20%20%20%20%20%20%20%20%20%20%20%20%20%20%20%20%20%20%20%20%20%20%20%20%20%20%20%20%20%20%20%20%20%20%20%20%20…	http://www.genome.jp/kegg-bin/search_pathway_object?org_name=ko&amp;unclassified=%20K01841%20K03430%20K03823%20K05306%20K06193%20K09459%20%20%20%20%20%20%20%20%20%20%20%20%20%20%20%20%20%20%20%20%20%20%20%20%20%20%20%20%20%20%20%20%20%20%20%20%20%20%20%20%20%20%20%20%20%20%20%20%20%20%20%20%20%20%20%20%20%20%20%20%20%20%20%20%20%20%20%20%20%20%20%20%20%20%20%20%20%20%20%20%20%20%20%20%20%20%20%20…	K01841	K03430	K03823	K05306	K06193	K09459
8	ko00982	0.00012792	0.000270219	Metabolism	Xenobiotics Biodegradation and Metabolism	Drug metabolism - cytochrome P450	0	0.000127921	0.00027022	0.473396	2.1124	-2.1124	2.11241	119	3	20	7	1	http://www.genome.jp/kegg-bin/search_pathway_object?org_name=ko&amp;unclassified=%20K00001%20%20%20%20%20%20%20%20%20%20%20%20%20%20%20%20%20%20%20%20%20%20%20%20%20%20%20%20%20%20%20%20%20%20%20%20%20%20%20%20%20%20%20%20%20%20%20%20%20%20%20%20%20%20%20%20%20%20%20%20%20%20%20%20%20%20%20%20%20%20%20%20%20%20%20%20%20%20%20%20%20%20%20%20%20%20%20%20%20%20%20%20%20%20%20%20%20%20%20%20%20%20%20…	http://www.genome.jp/kegg-bin/search_pathway_object?org_name=ko&amp;unclassified=%20K00001%20%20%20%20%20%20%20%20%20%20%20%20%20%20%20%20%20%20%20%20%20%20%20%20%20%20%20%20%20%20%20%20%20%20%20%20%20%20%20%20%20%20%20%20%20%20%20%20%20%20%20%20%20%20%20%20%20%20%20%20%20%20%20%20%20%20%20%20%20%20%20%20%20%20%20%20%20%20%20%20%20%20%20%20%20%20%20%20%20%20%20%20%20%20%20%20%20%20%20%20%20%20%20…	K00001
7	ko00980	0.000125559	0.000267036	Metabolism	Xenobiotics Biodegradation and Metabolism	Metabolism of xenobiotics by cytochrome P450	0	0.00012556	0.000267037	0.470197	2.12677	-2.12677	2.12678	118	3	22	6	1	http://www.genome.jp/kegg-bin/search_pathway_object?org_name=ko&amp;unclassified=%20K00001%20%20%20%20%20%20%20%20%20%20%20%20%20%20%20%20%20%20%20%20%20%20%20%20%20%20%20%20%20%20%20%20%20%20%20%20%20%20%20%20%20%20%20%20%20%20%20%20%20%20%20%20%20%20%20%20%20%20%20%20%20%20%20%20%20%20%20%20%20%20%20%20%20%20%20%20%20%20%20%20%20%20%20%20%20%20%20%20%20%20%20%20%20%20%20%20%20%20%20%20%20%20%20…	http://www.genome.jp/kegg-bin/search_pathway_object?org_name=ko&amp;unclassified=%20K00001%20%20%20%20%20%20%20%20%20%20%20%20%20%20%20%20%20%20%20%20%20%20%20%20%20%20%20%20%20%20%20%20%20%20%20%20%20%20%20%20%20%20%20%20%20%20%20%20%20%20%20%20%20%20%20%20%20%20%20%20%20%20%20%20%20%20%20%20%20%20%20%20%20%20%20%20%20%20%20%20%20%20%20%20%20%20%20%20%20%20%20%20%20%20%20%20%20%20%20%20%20%20%20…	K00001
4	ko00830	0.000120619	0.000263688	Metabolism	Metabolism of Cofactors and Vitamins	Retinol metabolism	0	0.00012062	0.000263689	0.457435	2.18611	-2.18611	2.18612	117	3	35	4	2	http://www.genome.jp/kegg-bin/search_pathway_object?org_name=ko&amp;unclassified=%20K00001%20K09516%20%20%20%20%20%20%20%20%20%20%20%20%20%20%20%20%20%20%20%20%20%20%20%20%20%20%20%20%20%20%20%20%20%20%20%20%20%20%20%20%20%20%20%20%20%20%20%20%20%20%20%20%20%20%20%20%20%20%20%20%20%20%20%20%20%20%20%20%20%20%20%20%20%20%20%20%20%20%20%20%20%20%20%20%20%20%20%20%20%20%20%20%20%20%20%20%20%20%20%20…	http://www.genome.jp/kegg-bin/search_pathway_object?org_name=ko&amp;unclassified=%20K00001%20K09516%20%20%20%20%20%20%20%20%20%20%20%20%20%20%20%20%20%20%20%20%20%20%20%20%20%20%20%20%20%20%20%20%20%20%20%20%20%20%20%20%20%20%20%20%20%20%20%20%20%20%20%20%20%20%20%20%20%20%20%20%20%20%20%20%20%20%20%20%20%20%20%20%20%20%20%20%20%20%20%20%20%20%20%20%20%20%20%20%20%20%20%20%20%20%20%20%20%20%20%20…	K00001	K09516
234	ko04040	0.000118404	0.000225017	Environmental Information Processing	Signaling Molecules and Interaction	Ion channels	0	0.000118405	0.000225018	0.526204	1.9004	-1.9004	1.90041	116	3	350	2	2	http://www.genome.jp/kegg-bin/search_pathway_object?org_name=ko&amp;unclassified=%20K02440%20K06188%20%20%20%20%20%20%20%20%20%20%20%20%20%20%20%20%20%20%20%20%20%20%20%20%20%20%20%20%20%20%20%20%20%20%20%20%20%20%20%20%20%20%20%20%20%20%20%20%20%20%20%20%20%20%20%20%20%20%20%20%20%20%20%20%20%20%20%20%20%20%20%20%20%20%20%20%20%20%20%20%20%20%20%20%20%20%20%20%20%20%20%20%20%20%20%20%20%20%20%20…	http://www.genome.jp/kegg-bin/search_pathway_object?org_name=ko&amp;unclassified=%20K02440%20K06188%20%20%20%20%20%20%20%20%20%20%20%20%20%20%20%20%20%20%20%20%20%20%20%20%20%20%20%20%20%20%20%20%20%20%20%20%20%20%20%20%20%20%20%20%20%20%20%20%20%20%20%20%20%20%20%20%20%20%20%20%20%20%20%20%20%20%20%20%20%20%20%20%20%20%20%20%20%20%20%20%20%20%20%20%20%20%20%20%20%20%20%20%20%20%20%20%20%20%20%20…	K02440	K06188
76	ko00643	8.59291e-05	0.000227899	Metabolism	Xenobiotics Biodegradation and Metabolism	Styrene degradation	0	8.59301e-05	0.0002279	0.377052	2.65216	-2.65216	2.65217	115	3	18	12	5	http://www.genome.jp/kegg-bin/search_pathway_object?org_name=ko&amp;unclassified=%20K01026%20K01039%20K01040%20K01501%20K01800%20%20%20%20%20%20%20%20%20%20%20%20%20%20%20%20%20%20%20%20%20%20%20%20%20%20%20%20%20%20%20%20%20%20%20%20%20%20%20%20%20%20%20%20%20%20%20%20%20%20%20%20%20%20%20%20%20%20%20%20%20%20%20%20%20%20%20%20%20%20%20%20%20%20%20%20%20%20%20%20%20%20%20%20%20%20%20%20%20%20%20…	http://www.genome.jp/kegg-bin/search_pathway_object?org_name=ko&amp;unclassified=%20K01026%20K01039%20K01040%20K01501%20K01800%20%20%20%20%20%20%20%20%20%20%20%20%20%20%20%20%20%20%20%20%20%20%20%20%20%20%20%20%20%20%20%20%20%20%20%20%20%20%20%20%20%20%20%20%20%20%20%20%20%20%20%20%20%20%20%20%20%20%20%20%20%20%20%20%20%20%20%20%20%20%20%20%20%20%20%20%20%20%20%20%20%20%20%20%20%20%20%20%20%20%20…	K01026	K01039	K01040	K01501	K01800
216	ko05211	7.0954e-05	0.00025791	Human Diseases	Cancers	Renal cell carcinoma	0	7.0955e-05	0.000257911	0.275114	3.63486	-3.63486	3.63489	114	3	50	1	1	http://www.genome.jp/kegg-bin/search_pathway_object?org_name=ko&amp;unclassified=%20K01679%20%20%20%20%20%20%20%20%20%20%20%20%20%20%20%20%20%20%20%20%20%20%20%20%20%20%20%20%20%20%20%20%20%20%20%20%20%20%20%20%20%20%20%20%20%20%20%20%20%20%20%20%20%20%20%20%20%20%20%20%20%20%20%20%20%20%20%20%20%20%20%20%20%20%20%20%20%20%20%20%20%20%20%20%20%20%20%20%20%20%20%20%20%20%20%20%20%20%20%20%20%20%20…	http://www.genome.jp/kegg-bin/search_pathway_object?org_name=ko&amp;unclassified=%20K01679%20%20%20%20%20%20%20%20%20%20%20%20%20%20%20%20%20%20%20%20%20%20%20%20%20%20%20%20%20%20%20%20%20%20%20%20%20%20%20%20%20%20%20%20%20%20%20%20%20%20%20%20%20%20%20%20%20%20%20%20%20%20%20%20%20%20%20%20%20%20%20%20%20%20%20%20%20%20%20%20%20%20%20%20%20%20%20%20%20%20%20%20%20%20%20%20%20%20%20%20%20%20%20…	K01679
201	ko00791	8.75431e-05	0.000184988	Metabolism	Xenobiotics Biodegradation and Metabolism	Atrazine degradation	0	8.75441e-05	0.000184989	0.47324	2.11309	-2.11309	2.1131	113	3	14	11	5	http://www.genome.jp/kegg-bin/search_pathway_object?org_name=ko&amp;unclassified=%20K01428%20K01429%20K01430%20K01564%20K14048%20%20%20%20%20%20%20%20%20%20%20%20%20%20%20%20%20%20%20%20%20%20%20%20%20%20%20%20%20%20%20%20%20%20%20%20%20%20%20%20%20%20%20%20%20%20%20%20%20%20%20%20%20%20%20%20%20%20%20%20%20%20%20%20%20%20%20%20%20%20%20%20%20%20%20%20%20%20%20%20%20%20%20%20%20%20%20%20%20%20%20…	http://www.genome.jp/kegg-bin/search_pathway_object?org_name=ko&amp;unclassified=%20K01428%20K01429%20K01430%20K01564%20K14048%20%20%20%20%20%20%20%20%20%20%20%20%20%20%20%20%20%20%20%20%20%20%20%20%20%20%20%20%20%20%20%20%20%20%20%20%20%20%20%20%20%20%20%20%20%20%20%20%20%20%20%20%20%20%20%20%20%20%20%20%20%20%20%20%20%20%20%20%20%20%20%20%20%20%20%20%20%20%20%20%20%20%20%20%20%20%20%20%20%20%20…	K01428	K01429	K01430	K01564	K14048
84	ko01053	6.70078e-05	2.15044e-05	Metabolism	Metabolism of Terpenoids and Polyketides	Biosynthesis of siderophore group nonribosomal peptides	0	6.70088e-05	2.15054e-05	3.1159	0.320935	3.1159	-3.116	112	3	32	27	1	http://www.genome.jp/kegg-bin/search_pathway_object?org_name=ko&amp;unclassified=%20K02363%20%20%20%20%20%20%20%20%20%20%20%20%20%20%20%20%20%20%20%20%20%20%20%20%20%20%20%20%20%20%20%20%20%20%20%20%20%20%20%20%20%20%20%20%20%20%20%20%20%20%20%20%20%20%20%20%20%20%20%20%20%20%20%20%20%20%20%20%20%20%20%20%20%20%20%20%20%20%20%20%20%20%20%20%20%20%20%20%20%20%20%20%20%20%20%20%20%20%20%20%20%20%20…	http://www.genome.jp/kegg-bin/search_pathway_object?org_name=ko&amp;unclassified=%20K02363%20%20%20%20%20%20%20%20%20%20%20%20%20%20%20%20%20%20%20%20%20%20%20%20%20%20%20%20%20%20%20%20%20%20%20%20%20%20%20%20%20%20%20%20%20%20%20%20%20%20%20%20%20%20%20%20%20%20%20%20%20%20%20%20%20%20%20%20%20%20%20%20%20%20%20%20%20%20%20%20%20%20%20%20%20%20%20%20%20%20%20%20%20%20%20%20%20%20%20%20%20%20%20…	K02363
184	ko00944	6.65924e-05	1.93935e-05	Metabolism	Biosynthesis of Other Secondary Metabolites	Flavone and flavonol biosynthesis	0	6.65934e-05	1.93945e-05	3.43363	0.291237	3.43363	-3.43375	111	3	12	1	1	http://www.genome.jp/kegg-bin/search_pathway_object?org_name=ko&amp;unclassified=%20K01195%20%20%20%20%20%20%20%20%20%20%20%20%20%20%20%20%20%20%20%20%20%20%20%20%20%20%20%20%20%20%20%20%20%20%20%20%20%20%20%20%20%20%20%20%20%20%20%20%20%20%20%20%20%20%20%20%20%20%20%20%20%20%20%20%20%20%20%20%20%20%20%20%20%20%20%20%20%20%20%20%20%20%20%20%20%20%20%20%20%20%20%20%20%20%20%20%20%20%20%20%20%20%20…	http://www.genome.jp/kegg-bin/search_pathway_object?org_name=ko&amp;unclassified=%20K01195%20%20%20%20%20%20%20%20%20%20%20%20%20%20%20%20%20%20%20%20%20%20%20%20%20%20%20%20%20%20%20%20%20%20%20%20%20%20%20%20%20%20%20%20%20%20%20%20%20%20%20%20%20%20%20%20%20%20%20%20%20%20%20%20%20%20%20%20%20%20%20%20%20%20%20%20%20%20%20%20%20%20%20%20%20%20%20%20%20%20%20%20%20%20%20%20%20%20%20%20%20%20%20…	K01195
182	ko04210	5.22363e-05	2.53892e-05	Cellular Processes	Cell Growth and Death	Apoptosis	0	5.22373e-05	2.53902e-05	2.05738	0.486055	2.05738	-2.05742	110	3	62	2	0	http://www.genome.jp/kegg-bin/search_pathway_object?org_name=ko&amp;unclassified=%20%20%20%20%20%20%20%20%20%20%20%20%20%20%20%20%20%20%20%20%20%20%20%20%20%20%20%20%20%20%20%20%20%20%20%20%20%20%20%20%20%20%20%20%20%20%20%20%20%20%20%20%20%20%20%20%20%20%20%20%20%20%20%20%20%20%20%20%20%20%20%20%20%20%20%20%20%20%20%20%20%20%20%20%20%20%20%20%20%20%20%20%20%20%20%20%20%20%20%20%20%20%20%20%20%20…	http://www.genome.jp/kegg-bin/search_pathway_object?org_name=ko&amp;unclassified=%20%20%20%20%20%20%20%20%20%20%20%20%20%20%20%20%20%20%20%20%20%20%20%20%20%20%20%20%20%20%20%20%20%20%20%20%20%20%20%20%20%20%20%20%20%20%20%20%20%20%20%20%20%20%20%20%20%20%20%20%20%20%20%20%20%20%20%20%20%20%20%20%20%20%20%20%20%20%20%20%20%20%20%20%20%20%20%20%20%20%20%20%20%20%20%20%20%20%20%20%20%20%20%20%20%20…
110	ko05016	5.5716e-05	1.83714e-05	Human Diseases	Neurodegenerative Diseases	Huntington's disease	0	5.5717e-05	1.83724e-05	3.03264	0.329745	3.03264	-3.03276	109	3	147	8	1	http://www.genome.jp/kegg-bin/search_pathway_object?org_name=ko&amp;unclassified=%20K04564%20%20%20%20%20%20%20%20%20%20%20%20%20%20%20%20%20%20%20%20%20%20%20%20%20%20%20%20%20%20%20%20%20%20%20%20%20%20%20%20%20%20%20%20%20%20%20%20%20%20%20%20%20%20%20%20%20%20%20%20%20%20%20%20%20%20%20%20%20%20%20%20%20%20%20%20%20%20%20%20%20%20%20%20%20%20%20%20%20%20%20%20%20%20%20%20%20%20%20%20%20%20%20…	http://www.genome.jp/kegg-bin/search_pathway_object?org_name=ko&amp;unclassified=%20K04564%20%20%20%20%20%20%20%20%20%20%20%20%20%20%20%20%20%20%20%20%20%20%20%20%20%20%20%20%20%20%20%20%20%20%20%20%20%20%20%20%20%20%20%20%20%20%20%20%20%20%20%20%20%20%20%20%20%20%20%20%20%20%20%20%20%20%20%20%20%20%20%20%20%20%20%20%20%20%20%20%20%20%20%20%20%20%20%20%20%20%20%20%20%20%20%20%20%20%20%20%20%20%20…	K04564
40	ko00140	8.32774e-05	3.53228e-05	Metabolism	Lipid Metabolism	Steroid hormone biosynthesis	0	8.32784e-05	3.53238e-05	2.35757	0.424165	2.35757	-2.35761	108	3	35	8	2	http://www.genome.jp/kegg-bin/search_pathway_object?org_name=ko&amp;unclassified=%20K00038%20K12343%20%20%20%20%20%20%20%20%20%20%20%20%20%20%20%20%20%20%20%20%20%20%20%20%20%20%20%20%20%20%20%20%20%20%20%20%20%20%20%20%20%20%20%20%20%20%20%20%20%20%20%20%20%20%20%20%20%20%20%20%20%20%20%20%20%20%20%20%20%20%20%20%20%20%20%20%20%20%20%20%20%20%20%20%20%20%20%20%20%20%20%20%20%20%20%20%20%20%20%20…	http://www.genome.jp/kegg-bin/search_pathway_object?org_name=ko&amp;unclassified=%20K00038%20K12343%20%20%20%20%20%20%20%20%20%20%20%20%20%20%20%20%20%20%20%20%20%20%20%20%20%20%20%20%20%20%20%20%20%20%20%20%20%20%20%20%20%20%20%20%20%20%20%20%20%20%20%20%20%20%20%20%20%20%20%20%20%20%20%20%20%20%20%20%20%20%20%20%20%20%20%20%20%20%20%20%20%20%20%20%20%20%20%20%20%20%20%20%20%20%20%20%20%20%20%20…	K00038	K12343
161	ko04622	8.17675e-05	2.96831e-05	Organismal Systems	Immune System	RIG-I-like receptor signaling pathway	0	8.17685e-05	2.96841e-05	2.75462	0.363026	2.75462	-2.75468	107	3	53	1	1	http://www.genome.jp/kegg-bin/search_pathway_object?org_name=ko&amp;unclassified=%20K00863%20%20%20%20%20%20%20%20%20%20%20%20%20%20%20%20%20%20%20%20%20%20%20%20%20%20%20%20%20%20%20%20%20%20%20%20%20%20%20%20%20%20%20%20%20%20%20%20%20%20%20%20%20%20%20%20%20%20%20%20%20%20%20%20%20%20%20%20%20%20%20%20%20%20%20%20%20%20%20%20%20%20%20%20%20%20%20%20%20%20%20%20%20%20%20%20%20%20%20%20%20%20%20…	http://www.genome.jp/kegg-bin/search_pathway_object?org_name=ko&amp;unclassified=%20K00863%20%20%20%20%20%20%20%20%20%20%20%20%20%20%20%20%20%20%20%20%20%20%20%20%20%20%20%20%20%20%20%20%20%20%20%20%20%20%20%20%20%20%20%20%20%20%20%20%20%20%20%20%20%20%20%20%20%20%20%20%20%20%20%20%20%20%20%20%20%20%20%20%20%20%20%20%20%20%20%20%20%20%20%20%20%20%20%20%20%20%20%20%20%20%20%20%20%20%20%20%20%20%20…	K00863
196	ko05150	3.70484e-05	6.71292e-05	Human Diseases	Infectious Diseases	Staphylococcus aureus infection	0	3.70494e-05	6.71302e-05	0.551904	1.81191	-1.81191	1.81193	106	3	65	19	0	http://www.genome.jp/kegg-bin/search_pathway_object?org_name=ko&amp;unclassified=%20%20%20%20%20%20%20%20%20%20%20%20%20%20%20%20%20%20%20%20%20%20%20%20%20%20%20%20%20%20%20%20%20%20%20%20%20%20%20%20%20%20%20%20%20%20%20%20%20%20%20%20%20%20%20%20%20%20%20%20%20%20%20%20%20%20%20%20%20%20%20%20%20%20%20%20%20%20%20%20%20%20%20%20%20%20%20%20%20%20%20%20%20%20%20%20%20%20%20%20%20%20%20%20%20%20…	http://www.genome.jp/kegg-bin/search_pathway_object?org_name=ko&amp;unclassified=%20%20%20%20%20%20%20%20%20%20%20%20%20%20%20%20%20%20%20%20%20%20%20%20%20%20%20%20%20%20%20%20%20%20%20%20%20%20%20%20%20%20%20%20%20%20%20%20%20%20%20%20%20%20%20%20%20%20%20%20%20%20%20%20%20%20%20%20%20%20%20%20%20%20%20%20%20%20%20%20%20%20%20%20%20%20%20%20%20%20%20%20%20%20%20%20%20%20%20%20%20%20%20%20%20%20…
97	ko00311	5.26838e-05	4.59052e-05	Metabolism	Biosynthesis of Other Secondary Metabolites	Penicillin and cephalosporin biosynthesis	0	5.26848e-05	4.59062e-05	1.14766	0.871336	1.14766	-1.14767	105	3	14	8	4	http://www.genome.jp/kegg-bin/search_pathway_object?org_name=ko&amp;unclassified=%20K01060%20K01434%20K01467%20K10852%20%20%20%20%20%20%20%20%20%20%20%20%20%20%20%20%20%20%20%20%20%20%20%20%20%20%20%20%20%20%20%20%20%20%20%20%20%20%20%20%20%20%20%20%20%20%20%20%20%20%20%20%20%20%20%20%20%20%20%20%20%20%20%20%20%20%20%20%20%20%20%20%20%20%20%20%20%20%20%20%20%20%20%20%20%20%20%20%20%20%20%20%20%20…	http://www.genome.jp/kegg-bin/search_pathway_object?org_name=ko&amp;unclassified=%20K01060%20K01434%20K01467%20K10852%20%20%20%20%20%20%20%20%20%20%20%20%20%20%20%20%20%20%20%20%20%20%20%20%20%20%20%20%20%20%20%20%20%20%20%20%20%20%20%20%20%20%20%20%20%20%20%20%20%20%20%20%20%20%20%20%20%20%20%20%20%20%20%20%20%20%20%20%20%20%20%20%20%20%20%20%20%20%20%20%20%20%20%20%20%20%20%20%20%20%20%20%20%20…	K01060	K01434	K01467	K10852
10	ko00930	1.61511e-05	7.74976e-06	Metabolism	Xenobiotics Biodegradation and Metabolism	Caprolactam degradation	0	1.61521e-05	7.75076e-06	2.08394	0.479861	2.08394	-2.08408	104	3	14	11	1	http://www.genome.jp/kegg-bin/search_pathway_object?org_name=ko&amp;unclassified=%20K00002%20%20%20%20%20%20%20%20%20%20%20%20%20%20%20%20%20%20%20%20%20%20%20%20%20%20%20%20%20%20%20%20%20%20%20%20%20%20%20%20%20%20%20%20%20%20%20%20%20%20%20%20%20%20%20%20%20%20%20%20%20%20%20%20%20%20%20%20%20%20%20%20%20%20%20%20%20%20%20%20%20%20%20%20%20%20%20%20%20%20%20%20%20%20%20%20%20%20%20%20%20%20%20…	http://www.genome.jp/kegg-bin/search_pathway_object?org_name=ko&amp;unclassified=%20K00002%20%20%20%20%20%20%20%20%20%20%20%20%20%20%20%20%20%20%20%20%20%20%20%20%20%20%20%20%20%20%20%20%20%20%20%20%20%20%20%20%20%20%20%20%20%20%20%20%20%20%20%20%20%20%20%20%20%20%20%20%20%20%20%20%20%20%20%20%20%20%20%20%20%20%20%20%20%20%20%20%20%20%20%20%20%20%20%20%20%20%20%20%20%20%20%20%20%20%20%20%20%20%20…	K00002
96	ko00472	1.56587e-05	8.09015e-06	Metabolism	Metabolism of Other Amino Acids	D-Arginine and D-ornithine metabolism	0	1.56597e-05	8.09115e-06	1.9354	0.516688	1.9354	-1.93552	103	3	2	2	0	http://www.genome.jp/kegg-bin/search_pathway_object?org_name=ko&amp;unclassified=%20%20%20%20%20%20%20%20%20%20%20%20%20%20%20%20%20%20%20%20%20%20%20%20%20%20%20%20%20%20%20%20%20%20%20%20%20%20%20%20%20%20%20%20%20%20%20%20%20%20%20%20%20%20%20%20%20%20%20%20%20%20%20%20%20%20%20%20%20%20%20%20%20%20%20%20%20%20%20%20%20%20%20%20%20%20%20%20%20%20%20%20%20%20%20%20%20%20%20%20%20%20%20%20%20%20…	http://www.genome.jp/kegg-bin/search_pathway_object?org_name=ko&amp;unclassified=%20%20%20%20%20%20%20%20%20%20%20%20%20%20%20%20%20%20%20%20%20%20%20%20%20%20%20%20%20%20%20%20%20%20%20%20%20%20%20%20%20%20%20%20%20%20%20%20%20%20%20%20%20%20%20%20%20%20%20%20%20%20%20%20%20%20%20%20%20%20%20%20%20%20%20%20%20%20%20%20%20%20%20%20%20%20%20%20%20%20%20%20%20%20%20%20%20%20%20%20%20%20%20%20%20%20…
88	ko00592	1.5983e-05	4.65708e-06	Metabolism	Lipid Metabolism	alpha-Linolenic acid metabolism	0	1.5984e-05	4.65808e-06	3.43145	0.291422	3.43145	-3.43197	102	3	16	3	1	http://www.genome.jp/kegg-bin/search_pathway_object?org_name=ko&amp;unclassified=%20K01058%20%20%20%20%20%20%20%20%20%20%20%20%20%20%20%20%20%20%20%20%20%20%20%20%20%20%20%20%20%20%20%20%20%20%20%20%20%20%20%20%20%20%20%20%20%20%20%20%20%20%20%20%20%20%20%20%20%20%20%20%20%20%20%20%20%20%20%20%20%20%20%20%20%20%20%20%20%20%20%20%20%20%20%20%20%20%20%20%20%20%20%20%20%20%20%20%20%20%20%20%20%20%20…	http://www.genome.jp/kegg-bin/search_pathway_object?org_name=ko&amp;unclassified=%20K01058%20%20%20%20%20%20%20%20%20%20%20%20%20%20%20%20%20%20%20%20%20%20%20%20%20%20%20%20%20%20%20%20%20%20%20%20%20%20%20%20%20%20%20%20%20%20%20%20%20%20%20%20%20%20%20%20%20%20%20%20%20%20%20%20%20%20%20%20%20%20%20%20%20%20%20%20%20%20%20%20%20%20%20%20%20%20%20%20%20%20%20%20%20%20%20%20%20%20%20%20%20%20%20…	K01058
206	ko05146	1.58624e-05	4.09596e-06	Human Diseases	Infectious Diseases	Amoebiasis	0	1.58634e-05	4.09696e-06	3.87198	0.258266	3.87198	-3.87268	101	3	78	4	2	http://www.genome.jp/kegg-bin/search_pathway_object?org_name=ko&amp;unclassified=%20K01476%20K13963%20%20%20%20%20%20%20%20%20%20%20%20%20%20%20%20%20%20%20%20%20%20%20%20%20%20%20%20%20%20%20%20%20%20%20%20%20%20%20%20%20%20%20%20%20%20%20%20%20%20%20%20%20%20%20%20%20%20%20%20%20%20%20%20%20%20%20%20%20%20%20%20%20%20%20%20%20%20%20%20%20%20%20%20%20%20%20%20%20%20%20%20%20%20%20%20%20%20%20%20…	http://www.genome.jp/kegg-bin/search_pathway_object?org_name=ko&amp;unclassified=%20K01476%20K13963%20%20%20%20%20%20%20%20%20%20%20%20%20%20%20%20%20%20%20%20%20%20%20%20%20%20%20%20%20%20%20%20%20%20%20%20%20%20%20%20%20%20%20%20%20%20%20%20%20%20%20%20%20%20%20%20%20%20%20%20%20%20%20%20%20%20%20%20%20%20%20%20%20%20%20%20%20%20%20%20%20%20%20%20%20%20%20%20%20%20%20%20%20%20%20%20%20%20%20%20…	K01476	K13963
122	ko00906	1.89988e-05	5.04741e-06	Metabolism	Metabolism of Terpenoids and Polyketides	Carotenoid biosynthesis	0	1.89998e-05	5.04841e-06	3.76353	0.265708	3.76353	-3.76408	100	3	35	23	0	http://www.genome.jp/kegg-bin/search_pathway_object?org_name=ko&amp;unclassified=%20%20%20%20%20%20%20%20%20%20%20%20%20%20%20%20%20%20%20%20%20%20%20%20%20%20%20%20%20%20%20%20%20%20%20%20%20%20%20%20%20%20%20%20%20%20%20%20%20%20%20%20%20%20%20%20%20%20%20%20%20%20%20%20%20%20%20%20%20%20%20%20%20%20%20%20%20%20%20%20%20%20%20%20%20%20%20%20%20%20%20%20%20%20%20%20%20%20%20%20%20%20%20%20%20%20…	http://www.genome.jp/kegg-bin/search_pathway_object?org_name=ko&amp;unclassified=%20%20%20%20%20%20%20%20%20%20%20%20%20%20%20%20%20%20%20%20%20%20%20%20%20%20%20%20%20%20%20%20%20%20%20%20%20%20%20%20%20%20%20%20%20%20%20%20%20%20%20%20%20%20%20%20%20%20%20%20%20%20%20%20%20%20%20%20%20%20%20%20%20%20%20%20%20%20%20%20%20%20%20%20%20%20%20%20%20%20%20%20%20%20%20%20%20%20%20%20%20%20%20%20%20%20…
185	ko00513	1.89937e-05	3.06311e-06	Metabolism	Glycan Biosynthesis and Metabolism	Various types of N-glycan biosynthesis	0	1.89947e-05	3.06411e-06	6.19907	0.161314	6.19907	-6.20077	99	3	49	2	1	http://www.genome.jp/kegg-bin/search_pathway_object?org_name=ko&amp;unclassified=%20K07151%20%20%20%20%20%20%20%20%20%20%20%20%20%20%20%20%20%20%20%20%20%20%20%20%20%20%20%20%20%20%20%20%20%20%20%20%20%20%20%20%20%20%20%20%20%20%20%20%20%20%20%20%20%20%20%20%20%20%20%20%20%20%20%20%20%20%20%20%20%20%20%20%20%20%20%20%20%20%20%20%20%20%20%20%20%20%20%20%20%20%20%20%20%20%20%20%20%20%20%20%20%20%20…	http://www.genome.jp/kegg-bin/search_pathway_object?org_name=ko&amp;unclassified=%20K07151%20%20%20%20%20%20%20%20%20%20%20%20%20%20%20%20%20%20%20%20%20%20%20%20%20%20%20%20%20%20%20%20%20%20%20%20%20%20%20%20%20%20%20%20%20%20%20%20%20%20%20%20%20%20%20%20%20%20%20%20%20%20%20%20%20%20%20%20%20%20%20%20%20%20%20%20%20%20%20%20%20%20%20%20%20%20%20%20%20%20%20%20%20%20%20%20%20%20%20%20%20%20%20…	K07151
151	ko05219	2.12747e-05	5.79309e-06	Human Diseases	Cancers	Bladder cancer	0	2.12757e-05	5.79409e-06	3.67196	0.272334	3.67196	-3.67242	98	3	33	1	1	http://www.genome.jp/kegg-bin/search_pathway_object?org_name=ko&amp;unclassified=%20K00758%20%20%20%20%20%20%20%20%20%20%20%20%20%20%20%20%20%20%20%20%20%20%20%20%20%20%20%20%20%20%20%20%20%20%20%20%20%20%20%20%20%20%20%20%20%20%20%20%20%20%20%20%20%20%20%20%20%20%20%20%20%20%20%20%20%20%20%20%20%20%20%20%20%20%20%20%20%20%20%20%20%20%20%20%20%20%20%20%20%20%20%20%20%20%20%20%20%20%20%20%20%20%20…	http://www.genome.jp/kegg-bin/search_pathway_object?org_name=ko&amp;unclassified=%20K00758%20%20%20%20%20%20%20%20%20%20%20%20%20%20%20%20%20%20%20%20%20%20%20%20%20%20%20%20%20%20%20%20%20%20%20%20%20%20%20%20%20%20%20%20%20%20%20%20%20%20%20%20%20%20%20%20%20%20%20%20%20%20%20%20%20%20%20%20%20%20%20%20%20%20%20%20%20%20%20%20%20%20%20%20%20%20%20%20%20%20%20%20%20%20%20%20%20%20%20%20%20%20%20…	K00758
109	ko05012	1.09287e-05	6.81116e-06	Human Diseases	Neurodegenerative Diseases	Parkinson's disease	0	1.09297e-05	6.81216e-06	1.60444	0.623269	1.60444	-1.60453	97	3	113	5	0	http://www.genome.jp/kegg-bin/search_pathway_object?org_name=ko&amp;unclassified=%20%20%20%20%20%20%20%20%20%20%20%20%20%20%20%20%20%20%20%20%20%20%20%20%20%20%20%20%20%20%20%20%20%20%20%20%20%20%20%20%20%20%20%20%20%20%20%20%20%20%20%20%20%20%20%20%20%20%20%20%20%20%20%20%20%20%20%20%20%20%20%20%20%20%20%20%20%20%20%20%20%20%20%20%20%20%20%20%20%20%20%20%20%20%20%20%20%20%20%20%20%20%20%20%20%20…	http://www.genome.jp/kegg-bin/search_pathway_object?org_name=ko&amp;unclassified=%20%20%20%20%20%20%20%20%20%20%20%20%20%20%20%20%20%20%20%20%20%20%20%20%20%20%20%20%20%20%20%20%20%20%20%20%20%20%20%20%20%20%20%20%20%20%20%20%20%20%20%20%20%20%20%20%20%20%20%20%20%20%20%20%20%20%20%20%20%20%20%20%20%20%20%20%20%20%20%20%20%20%20%20%20%20%20%20%20%20%20%20%20%20%20%20%20%20%20%20%20%20%20%20%20%20…
108	ko04260	1.02533e-05	6.01374e-06	Organismal Systems	Circulatory System	Cardiac muscle contraction	0	1.02543e-05	6.01474e-06	1.70485	0.58656	1.70485	-1.70497	96	3	58	4	0	http://www.genome.jp/kegg-bin/search_pathway_object?org_name=ko&amp;unclassified=%20%20%20%20%20%20%20%20%20%20%20%20%20%20%20%20%20%20%20%20%20%20%20%20%20%20%20%20%20%20%20%20%20%20%20%20%20%20%20%20%20%20%20%20%20%20%20%20%20%20%20%20%20%20%20%20%20%20%20%20%20%20%20%20%20%20%20%20%20%20%20%20%20%20%20%20%20%20%20%20%20%20%20%20%20%20%20%20%20%20%20%20%20%20%20%20%20%20%20%20%20%20%20%20%20%20…	http://www.genome.jp/kegg-bin/search_pathway_object?org_name=ko&amp;unclassified=%20%20%20%20%20%20%20%20%20%20%20%20%20%20%20%20%20%20%20%20%20%20%20%20%20%20%20%20%20%20%20%20%20%20%20%20%20%20%20%20%20%20%20%20%20%20%20%20%20%20%20%20%20%20%20%20%20%20%20%20%20%20%20%20%20%20%20%20%20%20%20%20%20%20%20%20%20%20%20%20%20%20%20%20%20%20%20%20%20%20%20%20%20%20%20%20%20%20%20%20%20%20%20%20%20%20…
86	ko00361	1.2323e-05	6.07875e-06	Metabolism	Xenobiotics Biodegradation and Metabolism	Chlorocyclohexane and chlorobenzene degradation	0	1.2324e-05	6.07975e-06	2.02706	0.493325	2.02706	-2.02723	95	3	19	20	3	http://www.genome.jp/kegg-bin/search_pathway_object?org_name=ko&amp;unclassified=%20K00224%20K00492%20K03381%20%20%20%20%20%20%20%20%20%20%20%20%20%20%20%20%20%20%20%20%20%20%20%20%20%20%20%20%20%20%20%20%20%20%20%20%20%20%20%20%20%20%20%20%20%20%20%20%20%20%20%20%20%20%20%20%20%20%20%20%20%20%20%20%20%20%20%20%20%20%20%20%20%20%20%20%20%20%20%20%20%20%20%20%20%20%20%20%20%20%20%20%20%20%20%20%20…	http://www.genome.jp/kegg-bin/search_pathway_object?org_name=ko&amp;unclassified=%20K00224%20K00492%20K03381%20%20%20%20%20%20%20%20%20%20%20%20%20%20%20%20%20%20%20%20%20%20%20%20%20%20%20%20%20%20%20%20%20%20%20%20%20%20%20%20%20%20%20%20%20%20%20%20%20%20%20%20%20%20%20%20%20%20%20%20%20%20%20%20%20%20%20%20%20%20%20%20%20%20%20%20%20%20%20%20%20%20%20%20%20%20%20%20%20%20%20%20%20%20%20%20%20…	K00224	K00492	K03381
282	ko05100	1.10685e-05	2.24444e-06	Human Diseases	Infectious Diseases	Bacterial invasion of epithelial cells	0	1.10695e-05	2.24544e-06	4.92978	0.202849	4.92978	-4.93153	94	3	65	17	0	http://www.genome.jp/kegg-bin/search_pathway_object?org_name=ko&amp;unclassified=%20%20%20%20%20%20%20%20%20%20%20%20%20%20%20%20%20%20%20%20%20%20%20%20%20%20%20%20%20%20%20%20%20%20%20%20%20%20%20%20%20%20%20%20%20%20%20%20%20%20%20%20%20%20%20%20%20%20%20%20%20%20%20%20%20%20%20%20%20%20%20%20%20%20%20%20%20%20%20%20%20%20%20%20%20%20%20%20%20%20%20%20%20%20%20%20%20%20%20%20%20%20%20%20%20%20…	http://www.genome.jp/kegg-bin/search_pathway_object?org_name=ko&amp;unclassified=%20%20%20%20%20%20%20%20%20%20%20%20%20%20%20%20%20%20%20%20%20%20%20%20%20%20%20%20%20%20%20%20%20%20%20%20%20%20%20%20%20%20%20%20%20%20%20%20%20%20%20%20%20%20%20%20%20%20%20%20%20%20%20%20%20%20%20%20%20%20%20%20%20%20%20%20%20%20%20%20%20%20%20%20%20%20%20%20%20%20%20%20%20%20%20%20%20%20%20%20%20%20%20%20%20%20…
219	ko04113	5.34824e-06	4.88702e-06	Cellular Processes	Cell Growth and Death	Meiosis - yeast	0	5.34924e-06	4.88802e-06	1.09436	0.913779	1.09436	-1.09438	93	3	99	4	1	http://www.genome.jp/kegg-bin/search_pathway_object?org_name=ko&amp;unclassified=%20K08139%20%20%20%20%20%20%20%20%20%20%20%20%20%20%20%20%20%20%20%20%20%20%20%20%20%20%20%20%20%20%20%20%20%20%20%20%20%20%20%20%20%20%20%20%20%20%20%20%20%20%20%20%20%20%20%20%20%20%20%20%20%20%20%20%20%20%20%20%20%20%20%20%20%20%20%20%20%20%20%20%20%20%20%20%20%20%20%20%20%20%20%20%20%20%20%20%20%20%20%20%20%20%20…	http://www.genome.jp/kegg-bin/search_pathway_object?org_name=ko&amp;unclassified=%20K08139%20%20%20%20%20%20%20%20%20%20%20%20%20%20%20%20%20%20%20%20%20%20%20%20%20%20%20%20%20%20%20%20%20%20%20%20%20%20%20%20%20%20%20%20%20%20%20%20%20%20%20%20%20%20%20%20%20%20%20%20%20%20%20%20%20%20%20%20%20%20%20%20%20%20%20%20%20%20%20%20%20%20%20%20%20%20%20%20%20%20%20%20%20%20%20%20%20%20%20%20%20%20%20…	K08139
222	ko03450	5.12932e-06	4.29498e-06	Genetic Information Processing	Replication and Repair	Non-homologous end-joining	0	5.13032e-06	4.29598e-06	1.19421	0.837372	1.19421	-1.19426	92	3	19	3	0	http://www.genome.jp/kegg-bin/search_pathway_object?org_name=ko&amp;unclassified=%20%20%20%20%20%20%20%20%20%20%20%20%20%20%20%20%20%20%20%20%20%20%20%20%20%20%20%20%20%20%20%20%20%20%20%20%20%20%20%20%20%20%20%20%20%20%20%20%20%20%20%20%20%20%20%20%20%20%20%20%20%20%20%20%20%20%20%20%20%20%20%20%20%20%20%20%20%20%20%20%20%20%20%20%20%20%20%20%20%20%20%20%20%20%20%20%20%20%20%20%20%20%20%20%20%20…	http://www.genome.jp/kegg-bin/search_pathway_object?org_name=ko&amp;unclassified=%20%20%20%20%20%20%20%20%20%20%20%20%20%20%20%20%20%20%20%20%20%20%20%20%20%20%20%20%20%20%20%20%20%20%20%20%20%20%20%20%20%20%20%20%20%20%20%20%20%20%20%20%20%20%20%20%20%20%20%20%20%20%20%20%20%20%20%20%20%20%20%20%20%20%20%20%20%20%20%20%20%20%20%20%20%20%20%20%20%20%20%20%20%20%20%20%20%20%20%20%20%20%20%20%20%20…
240	ko04121	5.67624e-06	3.56279e-06	Genetic Information Processing	Folding, Sorting and Degradation	Ubiquitin system	0	5.67724e-06	3.56379e-06	1.59303	0.627733	1.59303	-1.5932	91	3	544	3	1	http://www.genome.jp/kegg-bin/search_pathway_object?org_name=ko&amp;unclassified=%20K11996%20%20%20%20%20%20%20%20%20%20%20%20%20%20%20%20%20%20%20%20%20%20%20%20%20%20%20%20%20%20%20%20%20%20%20%20%20%20%20%20%20%20%20%20%20%20%20%20%20%20%20%20%20%20%20%20%20%20%20%20%20%20%20%20%20%20%20%20%20%20%20%20%20%20%20%20%20%20%20%20%20%20%20%20%20%20%20%20%20%20%20%20%20%20%20%20%20%20%20%20%20%20%20…	http://www.genome.jp/kegg-bin/search_pathway_object?org_name=ko&amp;unclassified=%20K11996%20%20%20%20%20%20%20%20%20%20%20%20%20%20%20%20%20%20%20%20%20%20%20%20%20%20%20%20%20%20%20%20%20%20%20%20%20%20%20%20%20%20%20%20%20%20%20%20%20%20%20%20%20%20%20%20%20%20%20%20%20%20%20%20%20%20%20%20%20%20%20%20%20%20%20%20%20%20%20%20%20%20%20%20%20%20%20%20%20%20%20%20%20%20%20%20%20%20%20%20%20%20%20…	K11996
85	ko00364	5.29534e-06	2.50298e-06	Metabolism	Xenobiotics Biodegradation and Metabolism	Fluorobenzoate degradation	0	5.29634e-06	2.50398e-06	2.11517	0.472775	2.11517	-2.11562	90	3	15	13	1	http://www.genome.jp/kegg-bin/search_pathway_object?org_name=ko&amp;unclassified=%20K03381%20%20%20%20%20%20%20%20%20%20%20%20%20%20%20%20%20%20%20%20%20%20%20%20%20%20%20%20%20%20%20%20%20%20%20%20%20%20%20%20%20%20%20%20%20%20%20%20%20%20%20%20%20%20%20%20%20%20%20%20%20%20%20%20%20%20%20%20%20%20%20%20%20%20%20%20%20%20%20%20%20%20%20%20%20%20%20%20%20%20%20%20%20%20%20%20%20%20%20%20%20%20%20…	http://www.genome.jp/kegg-bin/search_pathway_object?org_name=ko&amp;unclassified=%20K03381%20%20%20%20%20%20%20%20%20%20%20%20%20%20%20%20%20%20%20%20%20%20%20%20%20%20%20%20%20%20%20%20%20%20%20%20%20%20%20%20%20%20%20%20%20%20%20%20%20%20%20%20%20%20%20%20%20%20%20%20%20%20%20%20%20%20%20%20%20%20%20%20%20%20%20%20%20%20%20%20%20%20%20%20%20%20%20%20%20%20%20%20%20%20%20%20%20%20%20%20%20%20%20…	K03381
243	ko03022	3.67719e-06	2.08541e-06	Genetic Information Processing	Transcription	Basal transcription factors	0	3.67819e-06	2.08641e-06	1.76293	0.567239	1.76293	-1.76329	89	3	35	5	0	http://www.genome.jp/kegg-bin/search_pathway_object?org_name=ko&amp;unclassified=%20%20%20%20%20%20%20%20%20%20%20%20%20%20%20%20%20%20%20%20%20%20%20%20%20%20%20%20%20%20%20%20%20%20%20%20%20%20%20%20%20%20%20%20%20%20%20%20%20%20%20%20%20%20%20%20%20%20%20%20%20%20%20%20%20%20%20%20%20%20%20%20%20%20%20%20%20%20%20%20%20%20%20%20%20%20%20%20%20%20%20%20%20%20%20%20%20%20%20%20%20%20%20%20%20%20…	http://www.genome.jp/kegg-bin/search_pathway_object?org_name=ko&amp;unclassified=%20%20%20%20%20%20%20%20%20%20%20%20%20%20%20%20%20%20%20%20%20%20%20%20%20%20%20%20%20%20%20%20%20%20%20%20%20%20%20%20%20%20%20%20%20%20%20%20%20%20%20%20%20%20%20%20%20%20%20%20%20%20%20%20%20%20%20%20%20%20%20%20%20%20%20%20%20%20%20%20%20%20%20%20%20%20%20%20%20%20%20%20%20%20%20%20%20%20%20%20%20%20%20%20%20%20…
82	ko00100	3.18396e-06	2.29045e-06	Metabolism	Lipid Metabolism	Steroid biosynthesis	0	3.18496e-06	2.29145e-06	1.38993	0.71946	1.38993	-1.3901	88	3	32	10	0	http://www.genome.jp/kegg-bin/search_pathway_object?org_name=ko&amp;unclassified=%20%20%20%20%20%20%20%20%20%20%20%20%20%20%20%20%20%20%20%20%20%20%20%20%20%20%20%20%20%20%20%20%20%20%20%20%20%20%20%20%20%20%20%20%20%20%20%20%20%20%20%20%20%20%20%20%20%20%20%20%20%20%20%20%20%20%20%20%20%20%20%20%20%20%20%20%20%20%20%20%20%20%20%20%20%20%20%20%20%20%20%20%20%20%20%20%20%20%20%20%20%20%20%20%20%20…	http://www.genome.jp/kegg-bin/search_pathway_object?org_name=ko&amp;unclassified=%20%20%20%20%20%20%20%20%20%20%20%20%20%20%20%20%20%20%20%20%20%20%20%20%20%20%20%20%20%20%20%20%20%20%20%20%20%20%20%20%20%20%20%20%20%20%20%20%20%20%20%20%20%20%20%20%20%20%20%20%20%20%20%20%20%20%20%20%20%20%20%20%20%20%20%20%20%20%20%20%20%20%20%20%20%20%20%20%20%20%20%20%20%20%20%20%20%20%20%20%20%20%20%20%20%20…
87	ko00351	3.67714e-06	6.63993e-07	Metabolism	Xenobiotics Biodegradation and Metabolism	1,1,1-Trichloro-2,2-bis(4-chlorophenyl)ethane (DDT) degradation	0	3.67814e-06	6.64993e-07	5.53109	0.180796	5.53109	-5.53792	87	3	7	4	1	http://www.genome.jp/kegg-bin/search_pathway_object?org_name=ko&amp;unclassified=%20K00224%20%20%20%20%20%20%20%20%20%20%20%20%20%20%20%20%20%20%20%20%20%20%20%20%20%20%20%20%20%20%20%20%20%20%20%20%20%20%20%20%20%20%20%20%20%20%20%20%20%20%20%20%20%20%20%20%20%20%20%20%20%20%20%20%20%20%20%20%20%20%20%20%20%20%20%20%20%20%20%20%20%20%20%20%20%20%20%20%20%20%20%20%20%20%20%20%20%20%20%20%20%20%20…	http://www.genome.jp/kegg-bin/search_pathway_object?org_name=ko&amp;unclassified=%20K00224%20%20%20%20%20%20%20%20%20%20%20%20%20%20%20%20%20%20%20%20%20%20%20%20%20%20%20%20%20%20%20%20%20%20%20%20%20%20%20%20%20%20%20%20%20%20%20%20%20%20%20%20%20%20%20%20%20%20%20%20%20%20%20%20%20%20%20%20%20%20%20%20%20%20%20%20%20%20%20%20%20%20%20%20%20%20%20%20%20%20%20%20%20%20%20%20%20%20%20%20%20%20%20…	K00224
297	ko04115	7.97282e-07	8.50031e-07	Cellular Processes	Cell Growth and Death	p53 signaling pathway	0	7.98282e-07	8.51031e-07	0.938018	1.06608	-1.06608	1.06616	86	3	58	2	0	http://www.genome.jp/kegg-bin/search_pathway_object?org_name=ko&amp;unclassified=%20%20%20%20%20%20%20%20%20%20%20%20%20%20%20%20%20%20%20%20%20%20%20%20%20%20%20%20%20%20%20%20%20%20%20%20%20%20%20%20%20%20%20%20%20%20%20%20%20%20%20%20%20%20%20%20%20%20%20%20%20%20%20%20%20%20%20%20%20%20%20%20%20%20%20%20%20%20%20%20%20%20%20%20%20%20%20%20%20%20%20%20%20%20%20%20%20%20%20%20%20%20%20%20%20%20…	http://www.genome.jp/kegg-bin/search_pathway_object?org_name=ko&amp;unclassified=%20%20%20%20%20%20%20%20%20%20%20%20%20%20%20%20%20%20%20%20%20%20%20%20%20%20%20%20%20%20%20%20%20%20%20%20%20%20%20%20%20%20%20%20%20%20%20%20%20%20%20%20%20%20%20%20%20%20%20%20%20%20%20%20%20%20%20%20%20%20%20%20%20%20%20%20%20%20%20%20%20%20%20%20%20%20%20%20%20%20%20%20%20%20%20%20%20%20%20%20%20%20%20%20%20%20…
278	ko05416	7.99105e-07	8.44337e-07	Human Diseases	Cardiovascular Diseases	Viral myocarditis	0	8.00105e-07	8.45337e-07	0.946492	1.05653	-1.05653	1.0566	85	3	38	2	0	http://www.genome.jp/kegg-bin/search_pathway_object?org_name=ko&amp;unclassified=%20%20%20%20%20%20%20%20%20%20%20%20%20%20%20%20%20%20%20%20%20%20%20%20%20%20%20%20%20%20%20%20%20%20%20%20%20%20%20%20%20%20%20%20%20%20%20%20%20%20%20%20%20%20%20%20%20%20%20%20%20%20%20%20%20%20%20%20%20%20%20%20%20%20%20%20%20%20%20%20%20%20%20%20%20%20%20%20%20%20%20%20%20%20%20%20%20%20%20%20%20%20%20%20%20%20…	http://www.genome.jp/kegg-bin/search_pathway_object?org_name=ko&amp;unclassified=%20%20%20%20%20%20%20%20%20%20%20%20%20%20%20%20%20%20%20%20%20%20%20%20%20%20%20%20%20%20%20%20%20%20%20%20%20%20%20%20%20%20%20%20%20%20%20%20%20%20%20%20%20%20%20%20%20%20%20%20%20%20%20%20%20%20%20%20%20%20%20%20%20%20%20%20%20%20%20%20%20%20%20%20%20%20%20%20%20%20%20%20%20%20%20%20%20%20%20%20%20%20%20%20%20%20…
116	ko05145	7.91256e-07	8.54687e-07	Human Diseases	Infectious Diseases	Toxoplasmosis	0	7.92256e-07	8.55687e-07	0.925871	1.08006	-1.08006	1.08016	84	3	93	3	0	http://www.genome.jp/kegg-bin/search_pathway_object?org_name=ko&amp;unclassified=%20%20%20%20%20%20%20%20%20%20%20%20%20%20%20%20%20%20%20%20%20%20%20%20%20%20%20%20%20%20%20%20%20%20%20%20%20%20%20%20%20%20%20%20%20%20%20%20%20%20%20%20%20%20%20%20%20%20%20%20%20%20%20%20%20%20%20%20%20%20%20%20%20%20%20%20%20%20%20%20%20%20%20%20%20%20%20%20%20%20%20%20%20%20%20%20%20%20%20%20%20%20%20%20%20%20…	http://www.genome.jp/kegg-bin/search_pathway_object?org_name=ko&amp;unclassified=%20%20%20%20%20%20%20%20%20%20%20%20%20%20%20%20%20%20%20%20%20%20%20%20%20%20%20%20%20%20%20%20%20%20%20%20%20%20%20%20%20%20%20%20%20%20%20%20%20%20%20%20%20%20%20%20%20%20%20%20%20%20%20%20%20%20%20%20%20%20%20%20%20%20%20%20%20%20%20%20%20%20%20%20%20%20%20%20%20%20%20%20%20%20%20%20%20%20%20%20%20%20%20%20%20%20…
298	ko05210	7.79977e-07	8.44337e-07	Human Diseases	Cancers	Colorectal cancer	0	7.80977e-07	8.45337e-07	0.923865	1.08241	-1.08241	1.08251	83	3	49	1	0	http://www.genome.jp/kegg-bin/search_pathway_object?org_name=ko&amp;unclassified=%20%20%20%20%20%20%20%20%20%20%20%20%20%20%20%20%20%20%20%20%20%20%20%20%20%20%20%20%20%20%20%20%20%20%20%20%20%20%20%20%20%20%20%20%20%20%20%20%20%20%20%20%20%20%20%20%20%20%20%20%20%20%20%20%20%20%20%20%20%20%20%20%20%20%20%20%20%20%20%20%20%20%20%20%20%20%20%20%20%20%20%20%20%20%20%20%20%20%20%20%20%20%20%20%20%20…	http://www.genome.jp/kegg-bin/search_pathway_object?org_name=ko&amp;unclassified=%20%20%20%20%20%20%20%20%20%20%20%20%20%20%20%20%20%20%20%20%20%20%20%20%20%20%20%20%20%20%20%20%20%20%20%20%20%20%20%20%20%20%20%20%20%20%20%20%20%20%20%20%20%20%20%20%20%20%20%20%20%20%20%20%20%20%20%20%20%20%20%20%20%20%20%20%20%20%20%20%20%20%20%20%20%20%20%20%20%20%20%20%20%20%20%20%20%20%20%20%20%20%20%20%20%20…
227	ko00196	9.65848e-07	1.06257e-06	Metabolism	Energy Metabolism	Photosynthesis - antenna proteins	0	9.66848e-07	1.06357e-06	0.909059	1.10004	-1.10004	1.10014	82	3	41	26	1	http://www.genome.jp/kegg-bin/search_pathway_object?org_name=ko&amp;unclassified=%20K02290%20%20%20%20%20%20%20%20%20%20%20%20%20%20%20%20%20%20%20%20%20%20%20%20%20%20%20%20%20%20%20%20%20%20%20%20%20%20%20%20%20%20%20%20%20%20%20%20%20%20%20%20%20%20%20%20%20%20%20%20%20%20%20%20%20%20%20%20%20%20%20%20%20%20%20%20%20%20%20%20%20%20%20%20%20%20%20%20%20%20%20%20%20%20%20%20%20%20%20%20%20%20%20…	http://www.genome.jp/kegg-bin/search_pathway_object?org_name=ko&amp;unclassified=%20K02290%20%20%20%20%20%20%20%20%20%20%20%20%20%20%20%20%20%20%20%20%20%20%20%20%20%20%20%20%20%20%20%20%20%20%20%20%20%20%20%20%20%20%20%20%20%20%20%20%20%20%20%20%20%20%20%20%20%20%20%20%20%20%20%20%20%20%20%20%20%20%20%20%20%20%20%20%20%20%20%20%20%20%20%20%20%20%20%20%20%20%20%20%20%20%20%20%20%20%20%20%20%20%20…	K02290
288	ko05222	8.29587e-07	1.01303e-06	Human Diseases	Cancers	Small cell lung cancer	0	8.30587e-07	1.01403e-06	0.819094	1.22086	-1.22086	1.22113	81	3	63	3	0	http://www.genome.jp/kegg-bin/search_pathway_object?org_name=ko&amp;unclassified=%20%20%20%20%20%20%20%20%20%20%20%20%20%20%20%20%20%20%20%20%20%20%20%20%20%20%20%20%20%20%20%20%20%20%20%20%20%20%20%20%20%20%20%20%20%20%20%20%20%20%20%20%20%20%20%20%20%20%20%20%20%20%20%20%20%20%20%20%20%20%20%20%20%20%20%20%20%20%20%20%20%20%20%20%20%20%20%20%20%20%20%20%20%20%20%20%20%20%20%20%20%20%20%20%20%20…	http://www.genome.jp/kegg-bin/search_pathway_object?org_name=ko&amp;unclassified=%20%20%20%20%20%20%20%20%20%20%20%20%20%20%20%20%20%20%20%20%20%20%20%20%20%20%20%20%20%20%20%20%20%20%20%20%20%20%20%20%20%20%20%20%20%20%20%20%20%20%20%20%20%20%20%20%20%20%20%20%20%20%20%20%20%20%20%20%20%20%20%20%20%20%20%20%20%20%20%20%20%20%20%20%20%20%20%20%20%20%20%20%20%20%20%20%20%20%20%20%20%20%20%20%20%20…
247	ko03015	3.88406e-07	9.47465e-07	Genetic Information Processing	Translation	mRNA surveillance pathway	0	3.89406e-07	9.48465e-07	0.410564	2.43567	-2.43567	2.43937	80	3	53	2	1	http://www.genome.jp/kegg-bin/search_pathway_object?org_name=ko&amp;unclassified=%20K06965%20%20%20%20%20%20%20%20%20%20%20%20%20%20%20%20%20%20%20%20%20%20%20%20%20%20%20%20%20%20%20%20%20%20%20%20%20%20%20%20%20%20%20%20%20%20%20%20%20%20%20%20%20%20%20%20%20%20%20%20%20%20%20%20%20%20%20%20%20%20%20%20%20%20%20%20%20%20%20%20%20%20%20%20%20%20%20%20%20%20%20%20%20%20%20%20%20%20%20%20%20%20%20…	http://www.genome.jp/kegg-bin/search_pathway_object?org_name=ko&amp;unclassified=%20K06965%20%20%20%20%20%20%20%20%20%20%20%20%20%20%20%20%20%20%20%20%20%20%20%20%20%20%20%20%20%20%20%20%20%20%20%20%20%20%20%20%20%20%20%20%20%20%20%20%20%20%20%20%20%20%20%20%20%20%20%20%20%20%20%20%20%20%20%20%20%20%20%20%20%20%20%20%20%20%20%20%20%20%20%20%20%20%20%20%20%20%20%20%20%20%20%20%20%20%20%20%20%20%20…	K06965
269	ko04145	4.61522e-07	8.60817e-07	Cellular Processes	Transport and Catabolism	Phagosome	0	4.62522e-07	8.61817e-07	0.536682	1.8633	-1.8633	1.86517	79	3	93	2	0	http://www.genome.jp/kegg-bin/search_pathway_object?org_name=ko&amp;unclassified=%20%20%20%20%20%20%20%20%20%20%20%20%20%20%20%20%20%20%20%20%20%20%20%20%20%20%20%20%20%20%20%20%20%20%20%20%20%20%20%20%20%20%20%20%20%20%20%20%20%20%20%20%20%20%20%20%20%20%20%20%20%20%20%20%20%20%20%20%20%20%20%20%20%20%20%20%20%20%20%20%20%20%20%20%20%20%20%20%20%20%20%20%20%20%20%20%20%20%20%20%20%20%20%20%20%20…	http://www.genome.jp/kegg-bin/search_pathway_object?org_name=ko&amp;unclassified=%20%20%20%20%20%20%20%20%20%20%20%20%20%20%20%20%20%20%20%20%20%20%20%20%20%20%20%20%20%20%20%20%20%20%20%20%20%20%20%20%20%20%20%20%20%20%20%20%20%20%20%20%20%20%20%20%20%20%20%20%20%20%20%20%20%20%20%20%20%20%20%20%20%20%20%20%20%20%20%20%20%20%20%20%20%20%20%20%20%20%20%20%20%20%20%20%20%20%20%20%20%20%20%20%20%20…
299	ko00909	2.43446e-07	8.20518e-07	Metabolism	Metabolism of Terpenoids and Polyketides	Sesquiterpenoid biosynthesis	0	2.44446e-07	8.21518e-07	0.297554	3.36073	-3.36073	3.37043	78	3	19	3	0	http://www.genome.jp/kegg-bin/search_pathway_object?org_name=ko&amp;unclassified=%20%20%20%20%20%20%20%20%20%20%20%20%20%20%20%20%20%20%20%20%20%20%20%20%20%20%20%20%20%20%20%20%20%20%20%20%20%20%20%20%20%20%20%20%20%20%20%20%20%20%20%20%20%20%20%20%20%20%20%20%20%20%20%20%20%20%20%20%20%20%20%20%20%20%20%20%20%20%20%20%20%20%20%20%20%20%20%20%20%20%20%20%20%20%20%20%20%20%20%20%20%20%20%20%20%20…	http://www.genome.jp/kegg-bin/search_pathway_object?org_name=ko&amp;unclassified=%20%20%20%20%20%20%20%20%20%20%20%20%20%20%20%20%20%20%20%20%20%20%20%20%20%20%20%20%20%20%20%20%20%20%20%20%20%20%20%20%20%20%20%20%20%20%20%20%20%20%20%20%20%20%20%20%20%20%20%20%20%20%20%20%20%20%20%20%20%20%20%20%20%20%20%20%20%20%20%20%20%20%20%20%20%20%20%20%20%20%20%20%20%20%20%20%20%20%20%20%20%20%20%20%20%20…
57	ko00941	1.6699e-06	8.01934e-07	Metabolism	Biosynthesis of Other Secondary Metabolites	Flavonoid biosynthesis	0	1.6709e-06	8.02934e-07	2.081	0.480539	2.081	-2.08234	77	3	20	2	0	http://www.genome.jp/kegg-bin/search_pathway_object?org_name=ko&amp;unclassified=%20%20%20%20%20%20%20%20%20%20%20%20%20%20%20%20%20%20%20%20%20%20%20%20%20%20%20%20%20%20%20%20%20%20%20%20%20%20%20%20%20%20%20%20%20%20%20%20%20%20%20%20%20%20%20%20%20%20%20%20%20%20%20%20%20%20%20%20%20%20%20%20%20%20%20%20%20%20%20%20%20%20%20%20%20%20%20%20%20%20%20%20%20%20%20%20%20%20%20%20%20%20%20%20%20%20…	http://www.genome.jp/kegg-bin/search_pathway_object?org_name=ko&amp;unclassified=%20%20%20%20%20%20%20%20%20%20%20%20%20%20%20%20%20%20%20%20%20%20%20%20%20%20%20%20%20%20%20%20%20%20%20%20%20%20%20%20%20%20%20%20%20%20%20%20%20%20%20%20%20%20%20%20%20%20%20%20%20%20%20%20%20%20%20%20%20%20%20%20%20%20%20%20%20%20%20%20%20%20%20%20%20%20%20%20%20%20%20%20%20%20%20%20%20%20%20%20%20%20%20%20%20%20…
261	ko05020	1.38402e-06	4.72467e-07	Human Diseases	Neurodegenerative Diseases	Prion diseases	0	1.38502e-06	4.73467e-07	2.92527	0.341849	2.92527	-2.92934	76	3	29	1	0	http://www.genome.jp/kegg-bin/search_pathway_object?org_name=ko&amp;unclassified=%20%20%20%20%20%20%20%20%20%20%20%20%20%20%20%20%20%20%20%20%20%20%20%20%20%20%20%20%20%20%20%20%20%20%20%20%20%20%20%20%20%20%20%20%20%20%20%20%20%20%20%20%20%20%20%20%20%20%20%20%20%20%20%20%20%20%20%20%20%20%20%20%20%20%20%20%20%20%20%20%20%20%20%20%20%20%20%20%20%20%20%20%20%20%20%20%20%20%20%20%20%20%20%20%20%20…	http://www.genome.jp/kegg-bin/search_pathway_object?org_name=ko&amp;unclassified=%20%20%20%20%20%20%20%20%20%20%20%20%20%20%20%20%20%20%20%20%20%20%20%20%20%20%20%20%20%20%20%20%20%20%20%20%20%20%20%20%20%20%20%20%20%20%20%20%20%20%20%20%20%20%20%20%20%20%20%20%20%20%20%20%20%20%20%20%20%20%20%20%20%20%20%20%20%20%20%20%20%20%20%20%20%20%20%20%20%20%20%20%20%20%20%20%20%20%20%20%20%20%20%20%20%20…
300	ko00522	9.46969e-07	2.96353e-07	Metabolism	Metabolism of Terpenoids and Polyketides	Biosynthesis of 12-, 14- and 16-membered macrolides	0	9.47969e-07	2.97353e-07	3.18802	0.313674	3.18802	-3.1954	75	3	11	7	0	http://www.genome.jp/kegg-bin/search_pathway_object?org_name=ko&amp;unclassified=%20%20%20%20%20%20%20%20%20%20%20%20%20%20%20%20%20%20%20%20%20%20%20%20%20%20%20%20%20%20%20%20%20%20%20%20%20%20%20%20%20%20%20%20%20%20%20%20%20%20%20%20%20%20%20%20%20%20%20%20%20%20%20%20%20%20%20%20%20%20%20%20%20%20%20%20%20%20%20%20%20%20%20%20%20%20%20%20%20%20%20%20%20%20%20%20%20%20%20%20%20%20%20%20%20%20…	http://www.genome.jp/kegg-bin/search_pathway_object?org_name=ko&amp;unclassified=%20%20%20%20%20%20%20%20%20%20%20%20%20%20%20%20%20%20%20%20%20%20%20%20%20%20%20%20%20%20%20%20%20%20%20%20%20%20%20%20%20%20%20%20%20%20%20%20%20%20%20%20%20%20%20%20%20%20%20%20%20%20%20%20%20%20%20%20%20%20%20%20%20%20%20%20%20%20%20%20%20%20%20%20%20%20%20%20%20%20%20%20%20%20%20%20%20%20%20%20%20%20%20%20%20%20…
263	ko04370	5.08487e-08	3.93822e-08	Environmental Information Processing	Signal Transduction	VEGF signaling pathway	0	5.18487e-08	4.03822e-08	1.28395	0.778847	1.28395	-1.29116	74	3	33	2	0	http://www.genome.jp/kegg-bin/search_pathway_object?org_name=ko&amp;unclassified=%20%20%20%20%20%20%20%20%20%20%20%20%20%20%20%20%20%20%20%20%20%20%20%20%20%20%20%20%20%20%20%20%20%20%20%20%20%20%20%20%20%20%20%20%20%20%20%20%20%20%20%20%20%20%20%20%20%20%20%20%20%20%20%20%20%20%20%20%20%20%20%20%20%20%20%20%20%20%20%20%20%20%20%20%20%20%20%20%20%20%20%20%20%20%20%20%20%20%20%20%20%20%20%20%20%20…	http://www.genome.jp/kegg-bin/search_pathway_object?org_name=ko&amp;unclassified=%20%20%20%20%20%20%20%20%20%20%20%20%20%20%20%20%20%20%20%20%20%20%20%20%20%20%20%20%20%20%20%20%20%20%20%20%20%20%20%20%20%20%20%20%20%20%20%20%20%20%20%20%20%20%20%20%20%20%20%20%20%20%20%20%20%20%20%20%20%20%20%20%20%20%20%20%20%20%20%20%20%20%20%20%20%20%20%20%20%20%20%20%20%20%20%20%20%20%20%20%20%20%20%20%20%20…
302	ko05140	4.66444e-08	3.101e-08	Human Diseases	Infectious Diseases	Leishmaniasis	0	4.76444e-08	3.201e-08	1.48842	0.671852	1.48842	-1.50417	73	3	55	1	0	http://www.genome.jp/kegg-bin/search_pathway_object?org_name=ko&amp;unclassified=%20%20%20%20%20%20%20%20%20%20%20%20%20%20%20%20%20%20%20%20%20%20%20%20%20%20%20%20%20%20%20%20%20%20%20%20%20%20%20%20%20%20%20%20%20%20%20%20%20%20%20%20%20%20%20%20%20%20%20%20%20%20%20%20%20%20%20%20%20%20%20%20%20%20%20%20%20%20%20%20%20%20%20%20%20%20%20%20%20%20%20%20%20%20%20%20%20%20%20%20%20%20%20%20%20%20…	http://www.genome.jp/kegg-bin/search_pathway_object?org_name=ko&amp;unclassified=%20%20%20%20%20%20%20%20%20%20%20%20%20%20%20%20%20%20%20%20%20%20%20%20%20%20%20%20%20%20%20%20%20%20%20%20%20%20%20%20%20%20%20%20%20%20%20%20%20%20%20%20%20%20%20%20%20%20%20%20%20%20%20%20%20%20%20%20%20%20%20%20%20%20%20%20%20%20%20%20%20%20%20%20%20%20%20%20%20%20%20%20%20%20%20%20%20%20%20%20%20%20%20%20%20%20…
241	ko04150	6.11176e-08	4.13271e-08	Environmental Information Processing	Signal Transduction	mTOR signaling pathway	0	6.21176e-08	4.23271e-08	1.46756	0.681404	1.46756	-1.47887	72	3	30	1	0	http://www.genome.jp/kegg-bin/search_pathway_object?org_name=ko&amp;unclassified=%20%20%20%20%20%20%20%20%20%20%20%20%20%20%20%20%20%20%20%20%20%20%20%20%20%20%20%20%20%20%20%20%20%20%20%20%20%20%20%20%20%20%20%20%20%20%20%20%20%20%20%20%20%20%20%20%20%20%20%20%20%20%20%20%20%20%20%20%20%20%20%20%20%20%20%20%20%20%20%20%20%20%20%20%20%20%20%20%20%20%20%20%20%20%20%20%20%20%20%20%20%20%20%20%20%20…	http://www.genome.jp/kegg-bin/search_pathway_object?org_name=ko&amp;unclassified=%20%20%20%20%20%20%20%20%20%20%20%20%20%20%20%20%20%20%20%20%20%20%20%20%20%20%20%20%20%20%20%20%20%20%20%20%20%20%20%20%20%20%20%20%20%20%20%20%20%20%20%20%20%20%20%20%20%20%20%20%20%20%20%20%20%20%20%20%20%20%20%20%20%20%20%20%20%20%20%20%20%20%20%20%20%20%20%20%20%20%20%20%20%20%20%20%20%20%20%20%20%20%20%20%20%20…
262	ko04030	6.95071e-08	2.48977e-08	Environmental Information Processing	Signaling Molecules and Interaction	G protein-coupled receptors	0	7.05071e-08	2.58977e-08	2.72253	0.367306	2.72253	-2.79171	71	3	374	3	0	http://www.genome.jp/kegg-bin/search_pathway_object?org_name=ko&amp;unclassified=%20%20%20%20%20%20%20%20%20%20%20%20%20%20%20%20%20%20%20%20%20%20%20%20%20%20%20%20%20%20%20%20%20%20%20%20%20%20%20%20%20%20%20%20%20%20%20%20%20%20%20%20%20%20%20%20%20%20%20%20%20%20%20%20%20%20%20%20%20%20%20%20%20%20%20%20%20%20%20%20%20%20%20%20%20%20%20%20%20%20%20%20%20%20%20%20%20%20%20%20%20%20%20%20%20%20…	http://www.genome.jp/kegg-bin/search_pathway_object?org_name=ko&amp;unclassified=%20%20%20%20%20%20%20%20%20%20%20%20%20%20%20%20%20%20%20%20%20%20%20%20%20%20%20%20%20%20%20%20%20%20%20%20%20%20%20%20%20%20%20%20%20%20%20%20%20%20%20%20%20%20%20%20%20%20%20%20%20%20%20%20%20%20%20%20%20%20%20%20%20%20%20%20%20%20%20%20%20%20%20%20%20%20%20%20%20%20%20%20%20%20%20%20%20%20%20%20%20%20%20%20%20%20…
195	ko04610	5.72942e-08	2.1364e-08	Organismal Systems	Immune System	Complement and coagulation cascades	0	5.82942e-08	2.2364e-08	2.60661	0.383641	2.60661	-2.68181	70	3	69	1	0	http://www.genome.jp/kegg-bin/search_pathway_object?org_name=ko&amp;unclassified=%20%20%20%20%20%20%20%20%20%20%20%20%20%20%20%20%20%20%20%20%20%20%20%20%20%20%20%20%20%20%20%20%20%20%20%20%20%20%20%20%20%20%20%20%20%20%20%20%20%20%20%20%20%20%20%20%20%20%20%20%20%20%20%20%20%20%20%20%20%20%20%20%20%20%20%20%20%20%20%20%20%20%20%20%20%20%20%20%20%20%20%20%20%20%20%20%20%20%20%20%20%20%20%20%20%20…	http://www.genome.jp/kegg-bin/search_pathway_object?org_name=ko&amp;unclassified=%20%20%20%20%20%20%20%20%20%20%20%20%20%20%20%20%20%20%20%20%20%20%20%20%20%20%20%20%20%20%20%20%20%20%20%20%20%20%20%20%20%20%20%20%20%20%20%20%20%20%20%20%20%20%20%20%20%20%20%20%20%20%20%20%20%20%20%20%20%20%20%20%20%20%20%20%20%20%20%20%20%20%20%20%20%20%20%20%20%20%20%20%20%20%20%20%20%20%20%20%20%20%20%20%20%20…
245	ko05160	2.68386e-08	3.39308e-08	Human Diseases	Infectious Diseases	Hepatitis C	0	2.78386e-08	3.49308e-08	0.796965	1.25476	-1.25476	1.26425	69	3	74	1	0	http://www.genome.jp/kegg-bin/search_pathway_object?org_name=ko&amp;unclassified=%20%20%20%20%20%20%20%20%20%20%20%20%20%20%20%20%20%20%20%20%20%20%20%20%20%20%20%20%20%20%20%20%20%20%20%20%20%20%20%20%20%20%20%20%20%20%20%20%20%20%20%20%20%20%20%20%20%20%20%20%20%20%20%20%20%20%20%20%20%20%20%20%20%20%20%20%20%20%20%20%20%20%20%20%20%20%20%20%20%20%20%20%20%20%20%20%20%20%20%20%20%20%20%20%20%20…	http://www.genome.jp/kegg-bin/search_pathway_object?org_name=ko&amp;unclassified=%20%20%20%20%20%20%20%20%20%20%20%20%20%20%20%20%20%20%20%20%20%20%20%20%20%20%20%20%20%20%20%20%20%20%20%20%20%20%20%20%20%20%20%20%20%20%20%20%20%20%20%20%20%20%20%20%20%20%20%20%20%20%20%20%20%20%20%20%20%20%20%20%20%20%20%20%20%20%20%20%20%20%20%20%20%20%20%20%20%20%20%20%20%20%20%20%20%20%20%20%20%20%20%20%20%20…
244	ko05162	2.68386e-08	3.39308e-08	Human Diseases	Infectious Diseases	Measles	0	2.78386e-08	3.49308e-08	0.796965	1.25476	-1.25476	1.26425	68	3	99	1	0	http://www.genome.jp/kegg-bin/search_pathway_object?org_name=ko&amp;unclassified=%20%20%20%20%20%20%20%20%20%20%20%20%20%20%20%20%20%20%20%20%20%20%20%20%20%20%20%20%20%20%20%20%20%20%20%20%20%20%20%20%20%20%20%20%20%20%20%20%20%20%20%20%20%20%20%20%20%20%20%20%20%20%20%20%20%20%20%20%20%20%20%20%20%20%20%20%20%20%20%20%20%20%20%20%20%20%20%20%20%20%20%20%20%20%20%20%20%20%20%20%20%20%20%20%20%20…	http://www.genome.jp/kegg-bin/search_pathway_object?org_name=ko&amp;unclassified=%20%20%20%20%20%20%20%20%20%20%20%20%20%20%20%20%20%20%20%20%20%20%20%20%20%20%20%20%20%20%20%20%20%20%20%20%20%20%20%20%20%20%20%20%20%20%20%20%20%20%20%20%20%20%20%20%20%20%20%20%20%20%20%20%20%20%20%20%20%20%20%20%20%20%20%20%20%20%20%20%20%20%20%20%20%20%20%20%20%20%20%20%20%20%20%20%20%20%20%20%20%20%20%20%20%20…
173	ko04912	5.83212e-08	6.10881e-08	Organismal Systems	Endocrine System	GnRH signaling pathway	0	5.93212e-08	6.20881e-08	0.955435	1.04664	-1.04664	1.04744	67	3	60	1	0	http://www.genome.jp/kegg-bin/search_pathway_object?org_name=ko&amp;unclassified=%20%20%20%20%20%20%20%20%20%20%20%20%20%20%20%20%20%20%20%20%20%20%20%20%20%20%20%20%20%20%20%20%20%20%20%20%20%20%20%20%20%20%20%20%20%20%20%20%20%20%20%20%20%20%20%20%20%20%20%20%20%20%20%20%20%20%20%20%20%20%20%20%20%20%20%20%20%20%20%20%20%20%20%20%20%20%20%20%20%20%20%20%20%20%20%20%20%20%20%20%20%20%20%20%20%20…	http://www.genome.jp/kegg-bin/search_pathway_object?org_name=ko&amp;unclassified=%20%20%20%20%20%20%20%20%20%20%20%20%20%20%20%20%20%20%20%20%20%20%20%20%20%20%20%20%20%20%20%20%20%20%20%20%20%20%20%20%20%20%20%20%20%20%20%20%20%20%20%20%20%20%20%20%20%20%20%20%20%20%20%20%20%20%20%20%20%20%20%20%20%20%20%20%20%20%20%20%20%20%20%20%20%20%20%20%20%20%20%20%20%20%20%20%20%20%20%20%20%20%20%20%20%20…
172	ko04144	5.83212e-08	6.10881e-08	Cellular Processes	Transport and Catabolism	Endocytosis	0	5.93212e-08	6.20881e-08	0.955435	1.04664	-1.04664	1.04744	66	3	138	1	0	http://www.genome.jp/kegg-bin/search_pathway_object?org_name=ko&amp;unclassified=%20%20%20%20%20%20%20%20%20%20%20%20%20%20%20%20%20%20%20%20%20%20%20%20%20%20%20%20%20%20%20%20%20%20%20%20%20%20%20%20%20%20%20%20%20%20%20%20%20%20%20%20%20%20%20%20%20%20%20%20%20%20%20%20%20%20%20%20%20%20%20%20%20%20%20%20%20%20%20%20%20%20%20%20%20%20%20%20%20%20%20%20%20%20%20%20%20%20%20%20%20%20%20%20%20%20…	http://www.genome.jp/kegg-bin/search_pathway_object?org_name=ko&amp;unclassified=%20%20%20%20%20%20%20%20%20%20%20%20%20%20%20%20%20%20%20%20%20%20%20%20%20%20%20%20%20%20%20%20%20%20%20%20%20%20%20%20%20%20%20%20%20%20%20%20%20%20%20%20%20%20%20%20%20%20%20%20%20%20%20%20%20%20%20%20%20%20%20%20%20%20%20%20%20%20%20%20%20%20%20%20%20%20%20%20%20%20%20%20%20%20%20%20%20%20%20%20%20%20%20%20%20%20…
170	ko04666	6.25255e-08	6.94604e-08	Organismal Systems	Immune System	Fc gamma R-mediated phagocytosis	0	6.35255e-08	7.04604e-08	0.901579	1.10917	-1.10917	1.11091	65	3	53	2	0	http://www.genome.jp/kegg-bin/search_pathway_object?org_name=ko&amp;unclassified=%20%20%20%20%20%20%20%20%20%20%20%20%20%20%20%20%20%20%20%20%20%20%20%20%20%20%20%20%20%20%20%20%20%20%20%20%20%20%20%20%20%20%20%20%20%20%20%20%20%20%20%20%20%20%20%20%20%20%20%20%20%20%20%20%20%20%20%20%20%20%20%20%20%20%20%20%20%20%20%20%20%20%20%20%20%20%20%20%20%20%20%20%20%20%20%20%20%20%20%20%20%20%20%20%20%20…	http://www.genome.jp/kegg-bin/search_pathway_object?org_name=ko&amp;unclassified=%20%20%20%20%20%20%20%20%20%20%20%20%20%20%20%20%20%20%20%20%20%20%20%20%20%20%20%20%20%20%20%20%20%20%20%20%20%20%20%20%20%20%20%20%20%20%20%20%20%20%20%20%20%20%20%20%20%20%20%20%20%20%20%20%20%20%20%20%20%20%20%20%20%20%20%20%20%20%20%20%20%20%20%20%20%20%20%20%20%20%20%20%20%20%20%20%20%20%20%20%20%20%20%20%20%20…
273	ko04530	1.91274e-08	0	Cellular Processes	Cell Communication	Tight junction	0	2.01274e-08	1e-09	20.1274	0.0496836	20.1274	#DIV/0!	64	3	69	1	0	http://www.genome.jp/kegg-bin/search_pathway_object?org_name=ko&amp;unclassified=%20%20%20%20%20%20%20%20%20%20%20%20%20%20%20%20%20%20%20%20%20%20%20%20%20%20%20%20%20%20%20%20%20%20%20%20%20%20%20%20%20%20%20%20%20%20%20%20%20%20%20%20%20%20%20%20%20%20%20%20%20%20%20%20%20%20%20%20%20%20%20%20%20%20%20%20%20%20%20%20%20%20%20%20%20%20%20%20%20%20%20%20%20%20%20%20%20%20%20%20%20%20%20%20%20%20…	http://www.genome.jp/kegg-bin/search_pathway_object?org_name=ko&amp;unclassified=%20%20%20%20%20%20%20%20%20%20%20%20%20%20%20%20%20%20%20%20%20%20%20%20%20%20%20%20%20%20%20%20%20%20%20%20%20%20%20%20%20%20%20%20%20%20%20%20%20%20%20%20%20%20%20%20%20%20%20%20%20%20%20%20%20%20%20%20%20%20%20%20%20%20%20%20%20%20%20%20%20%20%20%20%20%20%20%20%20%20%20%20%20%20%20%20%20%20%20%20%20%20%20%20%20%20…
272	ko04520	1.91274e-08	0	Cellular Processes	Cell Communication	Adherens junction	0	2.01274e-08	1e-09	20.1274	0.0496836	20.1274	#DIV/0!	63	3	59	1	0	http://www.genome.jp/kegg-bin/search_pathway_object?org_name=ko&amp;unclassified=%20%20%20%20%20%20%20%20%20%20%20%20%20%20%20%20%20%20%20%20%20%20%20%20%20%20%20%20%20%20%20%20%20%20%20%20%20%20%20%20%20%20%20%20%20%20%20%20%20%20%20%20%20%20%20%20%20%20%20%20%20%20%20%20%20%20%20%20%20%20%20%20%20%20%20%20%20%20%20%20%20%20%20%20%20%20%20%20%20%20%20%20%20%20%20%20%20%20%20%20%20%20%20%20%20%20…	http://www.genome.jp/kegg-bin/search_pathway_object?org_name=ko&amp;unclassified=%20%20%20%20%20%20%20%20%20%20%20%20%20%20%20%20%20%20%20%20%20%20%20%20%20%20%20%20%20%20%20%20%20%20%20%20%20%20%20%20%20%20%20%20%20%20%20%20%20%20%20%20%20%20%20%20%20%20%20%20%20%20%20%20%20%20%20%20%20%20%20%20%20%20%20%20%20%20%20%20%20%20%20%20%20%20%20%20%20%20%20%20%20%20%20%20%20%20%20%20%20%20%20%20%20%20…
274	ko04670	1.91274e-08	0	Organismal Systems	Immune System	Leukocyte transendothelial migration	0	2.01274e-08	1e-09	20.1274	0.0496836	20.1274	#DIV/0!	62	3	71	1	0	http://www.genome.jp/kegg-bin/search_pathway_object?org_name=ko&amp;unclassified=%20%20%20%20%20%20%20%20%20%20%20%20%20%20%20%20%20%20%20%20%20%20%20%20%20%20%20%20%20%20%20%20%20%20%20%20%20%20%20%20%20%20%20%20%20%20%20%20%20%20%20%20%20%20%20%20%20%20%20%20%20%20%20%20%20%20%20%20%20%20%20%20%20%20%20%20%20%20%20%20%20%20%20%20%20%20%20%20%20%20%20%20%20%20%20%20%20%20%20%20%20%20%20%20%20%20…	http://www.genome.jp/kegg-bin/search_pathway_object?org_name=ko&amp;unclassified=%20%20%20%20%20%20%20%20%20%20%20%20%20%20%20%20%20%20%20%20%20%20%20%20%20%20%20%20%20%20%20%20%20%20%20%20%20%20%20%20%20%20%20%20%20%20%20%20%20%20%20%20%20%20%20%20%20%20%20%20%20%20%20%20%20%20%20%20%20%20%20%20%20%20%20%20%20%20%20%20%20%20%20%20%20%20%20%20%20%20%20%20%20%20%20%20%20%20%20%20%20%20%20%20%20%20…
275	ko04745	1.91274e-08	0	Organismal Systems	Sensory System	Phototransduction - fly	0	2.01274e-08	1e-09	20.1274	0.0496836	20.1274	#DIV/0!	61	3	18	1	0	http://www.genome.jp/kegg-bin/search_pathway_object?org_name=ko&amp;unclassified=%20%20%20%20%20%20%20%20%20%20%20%20%20%20%20%20%20%20%20%20%20%20%20%20%20%20%20%20%20%20%20%20%20%20%20%20%20%20%20%20%20%20%20%20%20%20%20%20%20%20%20%20%20%20%20%20%20%20%20%20%20%20%20%20%20%20%20%20%20%20%20%20%20%20%20%20%20%20%20%20%20%20%20%20%20%20%20%20%20%20%20%20%20%20%20%20%20%20%20%20%20%20%20%20%20%20…	http://www.genome.jp/kegg-bin/search_pathway_object?org_name=ko&amp;unclassified=%20%20%20%20%20%20%20%20%20%20%20%20%20%20%20%20%20%20%20%20%20%20%20%20%20%20%20%20%20%20%20%20%20%20%20%20%20%20%20%20%20%20%20%20%20%20%20%20%20%20%20%20%20%20%20%20%20%20%20%20%20%20%20%20%20%20%20%20%20%20%20%20%20%20%20%20%20%20%20%20%20%20%20%20%20%20%20%20%20%20%20%20%20%20%20%20%20%20%20%20%20%20%20%20%20%20…
276	ko05412	1.91274e-08	0	Human Diseases	Cardiovascular Diseases	Arrhythmogenic right ventricular cardiomyopathy (ARVC)	0	2.01274e-08	1e-09	20.1274	0.0496836	20.1274	#DIV/0!	60	3	65	1	0	http://www.genome.jp/kegg-bin/search_pathway_object?org_name=ko&amp;unclassified=%20%20%20%20%20%20%20%20%20%20%20%20%20%20%20%20%20%20%20%20%20%20%20%20%20%20%20%20%20%20%20%20%20%20%20%20%20%20%20%20%20%20%20%20%20%20%20%20%20%20%20%20%20%20%20%20%20%20%20%20%20%20%20%20%20%20%20%20%20%20%20%20%20%20%20%20%20%20%20%20%20%20%20%20%20%20%20%20%20%20%20%20%20%20%20%20%20%20%20%20%20%20%20%20%20%20…	http://www.genome.jp/kegg-bin/search_pathway_object?org_name=ko&amp;unclassified=%20%20%20%20%20%20%20%20%20%20%20%20%20%20%20%20%20%20%20%20%20%20%20%20%20%20%20%20%20%20%20%20%20%20%20%20%20%20%20%20%20%20%20%20%20%20%20%20%20%20%20%20%20%20%20%20%20%20%20%20%20%20%20%20%20%20%20%20%20%20%20%20%20%20%20%20%20%20%20%20%20%20%20%20%20%20%20%20%20%20%20%20%20%20%20%20%20%20%20%20%20%20%20%20%20%20…
277	ko05414	1.91274e-08	0	Human Diseases	Cardiovascular Diseases	Dilated cardiomyopathy (DCM)	0	2.01274e-08	1e-09	20.1274	0.0496836	20.1274	#DIV/0!	59	3	82	1	0	http://www.genome.jp/kegg-bin/search_pathway_object?org_name=ko&amp;unclassified=%20%20%20%20%20%20%20%20%20%20%20%20%20%20%20%20%20%20%20%20%20%20%20%20%20%20%20%20%20%20%20%20%20%20%20%20%20%20%20%20%20%20%20%20%20%20%20%20%20%20%20%20%20%20%20%20%20%20%20%20%20%20%20%20%20%20%20%20%20%20%20%20%20%20%20%20%20%20%20%20%20%20%20%20%20%20%20%20%20%20%20%20%20%20%20%20%20%20%20%20%20%20%20%20%20%20…	http://www.genome.jp/kegg-bin/search_pathway_object?org_name=ko&amp;unclassified=%20%20%20%20%20%20%20%20%20%20%20%20%20%20%20%20%20%20%20%20%20%20%20%20%20%20%20%20%20%20%20%20%20%20%20%20%20%20%20%20%20%20%20%20%20%20%20%20%20%20%20%20%20%20%20%20%20%20%20%20%20%20%20%20%20%20%20%20%20%20%20%20%20%20%20%20%20%20%20%20%20%20%20%20%20%20%20%20%20%20%20%20%20%20%20%20%20%20%20%20%20%20%20%20%20%20…
270	ko04810	1.91274e-08	3.15926e-09	Cellular Processes	Cell Motility	Regulation of actin cytoskeleton	0	2.01274e-08	4.15926e-09	4.83917	0.206647	4.83917	-6.05438	58	3	144	2	0	http://www.genome.jp/kegg-bin/search_pathway_object?org_name=ko&amp;unclassified=%20%20%20%20%20%20%20%20%20%20%20%20%20%20%20%20%20%20%20%20%20%20%20%20%20%20%20%20%20%20%20%20%20%20%20%20%20%20%20%20%20%20%20%20%20%20%20%20%20%20%20%20%20%20%20%20%20%20%20%20%20%20%20%20%20%20%20%20%20%20%20%20%20%20%20%20%20%20%20%20%20%20%20%20%20%20%20%20%20%20%20%20%20%20%20%20%20%20%20%20%20%20%20%20%20%20…	http://www.genome.jp/kegg-bin/search_pathway_object?org_name=ko&amp;unclassified=%20%20%20%20%20%20%20%20%20%20%20%20%20%20%20%20%20%20%20%20%20%20%20%20%20%20%20%20%20%20%20%20%20%20%20%20%20%20%20%20%20%20%20%20%20%20%20%20%20%20%20%20%20%20%20%20%20%20%20%20%20%20%20%20%20%20%20%20%20%20%20%20%20%20%20%20%20%20%20%20%20%20%20%20%20%20%20%20%20%20%20%20%20%20%20%20%20%20%20%20%20%20%20%20%20%20…
307	ko00532	1.58753e-08	0	Metabolism	Glycan Biosynthesis and Metabolism	Glycosaminoglycan biosynthesis - chondroitin sulfate	0	1.68753e-08	1e-09	16.8753	0.0592583	16.8753	#DIV/0!	57	3	21	1	0	http://www.genome.jp/kegg-bin/search_pathway_object?org_name=ko&amp;unclassified=%20%20%20%20%20%20%20%20%20%20%20%20%20%20%20%20%20%20%20%20%20%20%20%20%20%20%20%20%20%20%20%20%20%20%20%20%20%20%20%20%20%20%20%20%20%20%20%20%20%20%20%20%20%20%20%20%20%20%20%20%20%20%20%20%20%20%20%20%20%20%20%20%20%20%20%20%20%20%20%20%20%20%20%20%20%20%20%20%20%20%20%20%20%20%20%20%20%20%20%20%20%20%20%20%20%20…	http://www.genome.jp/kegg-bin/search_pathway_object?org_name=ko&amp;unclassified=%20%20%20%20%20%20%20%20%20%20%20%20%20%20%20%20%20%20%20%20%20%20%20%20%20%20%20%20%20%20%20%20%20%20%20%20%20%20%20%20%20%20%20%20%20%20%20%20%20%20%20%20%20%20%20%20%20%20%20%20%20%20%20%20%20%20%20%20%20%20%20%20%20%20%20%20%20%20%20%20%20%20%20%20%20%20%20%20%20%20%20%20%20%20%20%20%20%20%20%20%20%20%20%20%20%20…
192	ko04080	1.60682e-08	8.07932e-09	Environmental Information Processing	Signaling Molecules and Interaction	Neuroactive ligand-receptor interaction	0	1.70682e-08	9.07932e-09	1.8799	0.531944	1.8799	-1.98881	56	3	299	1	0	http://www.genome.jp/kegg-bin/search_pathway_object?org_name=ko&amp;unclassified=%20%20%20%20%20%20%20%20%20%20%20%20%20%20%20%20%20%20%20%20%20%20%20%20%20%20%20%20%20%20%20%20%20%20%20%20%20%20%20%20%20%20%20%20%20%20%20%20%20%20%20%20%20%20%20%20%20%20%20%20%20%20%20%20%20%20%20%20%20%20%20%20%20%20%20%20%20%20%20%20%20%20%20%20%20%20%20%20%20%20%20%20%20%20%20%20%20%20%20%20%20%20%20%20%20%20…	http://www.genome.jp/kegg-bin/search_pathway_object?org_name=ko&amp;unclassified=%20%20%20%20%20%20%20%20%20%20%20%20%20%20%20%20%20%20%20%20%20%20%20%20%20%20%20%20%20%20%20%20%20%20%20%20%20%20%20%20%20%20%20%20%20%20%20%20%20%20%20%20%20%20%20%20%20%20%20%20%20%20%20%20%20%20%20%20%20%20%20%20%20%20%20%20%20%20%20%20%20%20%20%20%20%20%20%20%20%20%20%20%20%20%20%20%20%20%20%20%20%20%20%20%20%20…
175	ko00563	1.51069e-08	8.26439e-09	Metabolism	Glycan Biosynthesis and Metabolism	Glycosylphosphatidylinositol(GPI)-anchor biosynthesis	0	1.61069e-08	9.26439e-09	1.73858	0.575182	1.73858	-1.82795	55	3	26	2	0	http://www.genome.jp/kegg-bin/search_pathway_object?org_name=ko&amp;unclassified=%20%20%20%20%20%20%20%20%20%20%20%20%20%20%20%20%20%20%20%20%20%20%20%20%20%20%20%20%20%20%20%20%20%20%20%20%20%20%20%20%20%20%20%20%20%20%20%20%20%20%20%20%20%20%20%20%20%20%20%20%20%20%20%20%20%20%20%20%20%20%20%20%20%20%20%20%20%20%20%20%20%20%20%20%20%20%20%20%20%20%20%20%20%20%20%20%20%20%20%20%20%20%20%20%20%20…	http://www.genome.jp/kegg-bin/search_pathway_object?org_name=ko&amp;unclassified=%20%20%20%20%20%20%20%20%20%20%20%20%20%20%20%20%20%20%20%20%20%20%20%20%20%20%20%20%20%20%20%20%20%20%20%20%20%20%20%20%20%20%20%20%20%20%20%20%20%20%20%20%20%20%20%20%20%20%20%20%20%20%20%20%20%20%20%20%20%20%20%20%20%20%20%20%20%20%20%20%20%20%20%20%20%20%20%20%20%20%20%20%20%20%20%20%20%20%20%20%20%20%20%20%20%20…
305	ko00331	1.22425e-08	7.95869e-09	Metabolism	Biosynthesis of Other Secondary Metabolites	Clavulanic acid biosynthesis	0	1.32425e-08	8.95869e-09	1.47818	0.676509	1.47818	-1.53826	54	3	5	2	0	http://www.genome.jp/kegg-bin/search_pathway_object?org_name=ko&amp;unclassified=%20%20%20%20%20%20%20%20%20%20%20%20%20%20%20%20%20%20%20%20%20%20%20%20%20%20%20%20%20%20%20%20%20%20%20%20%20%20%20%20%20%20%20%20%20%20%20%20%20%20%20%20%20%20%20%20%20%20%20%20%20%20%20%20%20%20%20%20%20%20%20%20%20%20%20%20%20%20%20%20%20%20%20%20%20%20%20%20%20%20%20%20%20%20%20%20%20%20%20%20%20%20%20%20%20%20…	http://www.genome.jp/kegg-bin/search_pathway_object?org_name=ko&amp;unclassified=%20%20%20%20%20%20%20%20%20%20%20%20%20%20%20%20%20%20%20%20%20%20%20%20%20%20%20%20%20%20%20%20%20%20%20%20%20%20%20%20%20%20%20%20%20%20%20%20%20%20%20%20%20%20%20%20%20%20%20%20%20%20%20%20%20%20%20%20%20%20%20%20%20%20%20%20%20%20%20%20%20%20%20%20%20%20%20%20%20%20%20%20%20%20%20%20%20%20%20%20%20%20%20%20%20%20…
284	ko04962	1.23432e-08	1.66681e-08	Organismal Systems	Excretory System	Vasopressin-regulated water reabsorption	0	1.33432e-08	1.76681e-08	0.755216	1.32412	-1.32412	1.35038	53	3	33	1	0	http://www.genome.jp/kegg-bin/search_pathway_object?org_name=ko&amp;unclassified=%20%20%20%20%20%20%20%20%20%20%20%20%20%20%20%20%20%20%20%20%20%20%20%20%20%20%20%20%20%20%20%20%20%20%20%20%20%20%20%20%20%20%20%20%20%20%20%20%20%20%20%20%20%20%20%20%20%20%20%20%20%20%20%20%20%20%20%20%20%20%20%20%20%20%20%20%20%20%20%20%20%20%20%20%20%20%20%20%20%20%20%20%20%20%20%20%20%20%20%20%20%20%20%20%20%20…	http://www.genome.jp/kegg-bin/search_pathway_object?org_name=ko&amp;unclassified=%20%20%20%20%20%20%20%20%20%20%20%20%20%20%20%20%20%20%20%20%20%20%20%20%20%20%20%20%20%20%20%20%20%20%20%20%20%20%20%20%20%20%20%20%20%20%20%20%20%20%20%20%20%20%20%20%20%20%20%20%20%20%20%20%20%20%20%20%20%20%20%20%20%20%20%20%20%20%20%20%20%20%20%20%20%20%20%20%20%20%20%20%20%20%20%20%20%20%20%20%20%20%20%20%20%20…
266	ko00943	1.17988e-08	1.48226e-08	Metabolism	Biosynthesis of Other Secondary Metabolites	Isoflavonoid biosynthesis	0	1.27988e-08	1.58226e-08	0.808896	1.23625	-1.23625	1.25628	52	3	13	1	0	http://www.genome.jp/kegg-bin/search_pathway_object?org_name=ko&amp;unclassified=%20%20%20%20%20%20%20%20%20%20%20%20%20%20%20%20%20%20%20%20%20%20%20%20%20%20%20%20%20%20%20%20%20%20%20%20%20%20%20%20%20%20%20%20%20%20%20%20%20%20%20%20%20%20%20%20%20%20%20%20%20%20%20%20%20%20%20%20%20%20%20%20%20%20%20%20%20%20%20%20%20%20%20%20%20%20%20%20%20%20%20%20%20%20%20%20%20%20%20%20%20%20%20%20%20%20…	http://www.genome.jp/kegg-bin/search_pathway_object?org_name=ko&amp;unclassified=%20%20%20%20%20%20%20%20%20%20%20%20%20%20%20%20%20%20%20%20%20%20%20%20%20%20%20%20%20%20%20%20%20%20%20%20%20%20%20%20%20%20%20%20%20%20%20%20%20%20%20%20%20%20%20%20%20%20%20%20%20%20%20%20%20%20%20%20%20%20%20%20%20%20%20%20%20%20%20%20%20%20%20%20%20%20%20%20%20%20%20%20%20%20%20%20%20%20%20%20%20%20%20%20%20%20…
291	ko04270	0	3.15926e-09	Organismal Systems	Circulatory System	Vascular smooth muscle contraction	0	1e-09	4.15926e-09	0.240427	4.15926	-4.15926	#DIV/0!	51	3	82	1	0	http://www.genome.jp/kegg-bin/search_pathway_object?org_name=ko&amp;unclassified=%20%20%20%20%20%20%20%20%20%20%20%20%20%20%20%20%20%20%20%20%20%20%20%20%20%20%20%20%20%20%20%20%20%20%20%20%20%20%20%20%20%20%20%20%20%20%20%20%20%20%20%20%20%20%20%20%20%20%20%20%20%20%20%20%20%20%20%20%20%20%20%20%20%20%20%20%20%20%20%20%20%20%20%20%20%20%20%20%20%20%20%20%20%20%20%20%20%20%20%20%20%20%20%20%20%20…	http://www.genome.jp/kegg-bin/search_pathway_object?org_name=ko&amp;unclassified=%20%20%20%20%20%20%20%20%20%20%20%20%20%20%20%20%20%20%20%20%20%20%20%20%20%20%20%20%20%20%20%20%20%20%20%20%20%20%20%20%20%20%20%20%20%20%20%20%20%20%20%20%20%20%20%20%20%20%20%20%20%20%20%20%20%20%20%20%20%20%20%20%20%20%20%20%20%20%20%20%20%20%20%20%20%20%20%20%20%20%20%20%20%20%20%20%20%20%20%20%20%20%20%20%20%20…
290	ko04114	0	3.15926e-09	Cellular Processes	Cell Growth and Death	Oocyte meiosis	0	1e-09	4.15926e-09	0.240427	4.15926	-4.15926	#DIV/0!	50	3	74	1	0	http://www.genome.jp/kegg-bin/search_pathway_object?org_name=ko&amp;unclassified=%20%20%20%20%20%20%20%20%20%20%20%20%20%20%20%20%20%20%20%20%20%20%20%20%20%20%20%20%20%20%20%20%20%20%20%20%20%20%20%20%20%20%20%20%20%20%20%20%20%20%20%20%20%20%20%20%20%20%20%20%20%20%20%20%20%20%20%20%20%20%20%20%20%20%20%20%20%20%20%20%20%20%20%20%20%20%20%20%20%20%20%20%20%20%20%20%20%20%20%20%20%20%20%20%20%20…	http://www.genome.jp/kegg-bin/search_pathway_object?org_name=ko&amp;unclassified=%20%20%20%20%20%20%20%20%20%20%20%20%20%20%20%20%20%20%20%20%20%20%20%20%20%20%20%20%20%20%20%20%20%20%20%20%20%20%20%20%20%20%20%20%20%20%20%20%20%20%20%20%20%20%20%20%20%20%20%20%20%20%20%20%20%20%20%20%20%20%20%20%20%20%20%20%20%20%20%20%20%20%20%20%20%20%20%20%20%20%20%20%20%20%20%20%20%20%20%20%20%20%20%20%20%20…
292	ko04720	0	3.15926e-09	Organismal Systems	Nervous System	Long-term potentiation	0	1e-09	4.15926e-09	0.240427	4.15926	-4.15926	#DIV/0!	49	3	41	1	0	http://www.genome.jp/kegg-bin/search_pathway_object?org_name=ko&amp;unclassified=%20%20%20%20%20%20%20%20%20%20%20%20%20%20%20%20%20%20%20%20%20%20%20%20%20%20%20%20%20%20%20%20%20%20%20%20%20%20%20%20%20%20%20%20%20%20%20%20%20%20%20%20%20%20%20%20%20%20%20%20%20%20%20%20%20%20%20%20%20%20%20%20%20%20%20%20%20%20%20%20%20%20%20%20%20%20%20%20%20%20%20%20%20%20%20%20%20%20%20%20%20%20%20%20%20%20…	http://www.genome.jp/kegg-bin/search_pathway_object?org_name=ko&amp;unclassified=%20%20%20%20%20%20%20%20%20%20%20%20%20%20%20%20%20%20%20%20%20%20%20%20%20%20%20%20%20%20%20%20%20%20%20%20%20%20%20%20%20%20%20%20%20%20%20%20%20%20%20%20%20%20%20%20%20%20%20%20%20%20%20%20%20%20%20%20%20%20%20%20%20%20%20%20%20%20%20%20%20%20%20%20%20%20%20%20%20%20%20%20%20%20%20%20%20%20%20%20%20%20%20%20%20%20…
295	ko00062	0	2.51944e-09	Metabolism	Lipid Metabolism	Fatty acid elongation in mitochondria	0	1e-09	3.51944e-09	0.284137	3.51944	-3.51944	#DIV/0!	48	3	7	1	0	http://www.genome.jp/kegg-bin/search_pathway_object?org_name=ko&amp;unclassified=%20%20%20%20%20%20%20%20%20%20%20%20%20%20%20%20%20%20%20%20%20%20%20%20%20%20%20%20%20%20%20%20%20%20%20%20%20%20%20%20%20%20%20%20%20%20%20%20%20%20%20%20%20%20%20%20%20%20%20%20%20%20%20%20%20%20%20%20%20%20%20%20%20%20%20%20%20%20%20%20%20%20%20%20%20%20%20%20%20%20%20%20%20%20%20%20%20%20%20%20%20%20%20%20%20%20…	http://www.genome.jp/kegg-bin/search_pathway_object?org_name=ko&amp;unclassified=%20%20%20%20%20%20%20%20%20%20%20%20%20%20%20%20%20%20%20%20%20%20%20%20%20%20%20%20%20%20%20%20%20%20%20%20%20%20%20%20%20%20%20%20%20%20%20%20%20%20%20%20%20%20%20%20%20%20%20%20%20%20%20%20%20%20%20%20%20%20%20%20%20%20%20%20%20%20%20%20%20%20%20%20%20%20%20%20%20%20%20%20%20%20%20%20%20%20%20%20%20%20%20%20%20%20…
304	ko00902	0	5.41893e-09	Metabolism	Metabolism of Terpenoids and Polyketides	Monoterpenoid biosynthesis	0	1e-09	6.41893e-09	0.155789	6.41893	-6.41893	#DIV/0!	47	3	8	1	0	http://www.genome.jp/kegg-bin/search_pathway_object?org_name=ko&amp;unclassified=%20%20%20%20%20%20%20%20%20%20%20%20%20%20%20%20%20%20%20%20%20%20%20%20%20%20%20%20%20%20%20%20%20%20%20%20%20%20%20%20%20%20%20%20%20%20%20%20%20%20%20%20%20%20%20%20%20%20%20%20%20%20%20%20%20%20%20%20%20%20%20%20%20%20%20%20%20%20%20%20%20%20%20%20%20%20%20%20%20%20%20%20%20%20%20%20%20%20%20%20%20%20%20%20%20%20…	http://www.genome.jp/kegg-bin/search_pathway_object?org_name=ko&amp;unclassified=%20%20%20%20%20%20%20%20%20%20%20%20%20%20%20%20%20%20%20%20%20%20%20%20%20%20%20%20%20%20%20%20%20%20%20%20%20%20%20%20%20%20%20%20%20%20%20%20%20%20%20%20%20%20%20%20%20%20%20%20%20%20%20%20%20%20%20%20%20%20%20%20%20%20%20%20%20%20%20%20%20%20%20%20%20%20%20%20%20%20%20%20%20%20%20%20%20%20%20%20%20%20%20%20%20%20…
150	ko00601	5.01063e-09	4.18326e-09	Metabolism	Glycan Biosynthesis and Metabolism	Glycosphingolipid biosynthesis - lacto and neolacto series	0	6.01063e-09	5.18326e-09	1.15962	0.86235	1.15962	-1.19778	46	3	25	1	0	http://www.genome.jp/kegg-bin/search_pathway_object?org_name=ko&amp;unclassified=%20%20%20%20%20%20%20%20%20%20%20%20%20%20%20%20%20%20%20%20%20%20%20%20%20%20%20%20%20%20%20%20%20%20%20%20%20%20%20%20%20%20%20%20%20%20%20%20%20%20%20%20%20%20%20%20%20%20%20%20%20%20%20%20%20%20%20%20%20%20%20%20%20%20%20%20%20%20%20%20%20%20%20%20%20%20%20%20%20%20%20%20%20%20%20%20%20%20%20%20%20%20%20%20%20%20…	http://www.genome.jp/kegg-bin/search_pathway_object?org_name=ko&amp;unclassified=%20%20%20%20%20%20%20%20%20%20%20%20%20%20%20%20%20%20%20%20%20%20%20%20%20%20%20%20%20%20%20%20%20%20%20%20%20%20%20%20%20%20%20%20%20%20%20%20%20%20%20%20%20%20%20%20%20%20%20%20%20%20%20%20%20%20%20%20%20%20%20%20%20%20%20%20%20%20%20%20%20%20%20%20%20%20%20%20%20%20%20%20%20%20%20%20%20%20%20%20%20%20%20%20%20%20…
209	ko04971	1.08574e-07	4.69129e-08	Organismal Systems	Digestive System	Gastric acid secretion	0	1.09574e-07	4.79129e-08	2.28694	0.437265	2.28694	-2.31438	45	3	46	1	0	http://www.genome.jp/kegg-bin/search_pathway_object?org_name=ko&amp;unclassified=%20%20%20%20%20%20%20%20%20%20%20%20%20%20%20%20%20%20%20%20%20%20%20%20%20%20%20%20%20%20%20%20%20%20%20%20%20%20%20%20%20%20%20%20%20%20%20%20%20%20%20%20%20%20%20%20%20%20%20%20%20%20%20%20%20%20%20%20%20%20%20%20%20%20%20%20%20%20%20%20%20%20%20%20%20%20%20%20%20%20%20%20%20%20%20%20%20%20%20%20%20%20%20%20%20%20…	http://www.genome.jp/kegg-bin/search_pathway_object?org_name=ko&amp;unclassified=%20%20%20%20%20%20%20%20%20%20%20%20%20%20%20%20%20%20%20%20%20%20%20%20%20%20%20%20%20%20%20%20%20%20%20%20%20%20%20%20%20%20%20%20%20%20%20%20%20%20%20%20%20%20%20%20%20%20%20%20%20%20%20%20%20%20%20%20%20%20%20%20%20%20%20%20%20%20%20%20%20%20%20%20%20%20%20%20%20%20%20%20%20%20%20%20%20%20%20%20%20%20%20%20%20%20…
208	ko04970	1.08574e-07	4.69129e-08	Organismal Systems	Digestive System	Salivary secretion	0	1.09574e-07	4.79129e-08	2.28694	0.437265	2.28694	-2.31438	44	3	59	1	0	http://www.genome.jp/kegg-bin/search_pathway_object?org_name=ko&amp;unclassified=%20%20%20%20%20%20%20%20%20%20%20%20%20%20%20%20%20%20%20%20%20%20%20%20%20%20%20%20%20%20%20%20%20%20%20%20%20%20%20%20%20%20%20%20%20%20%20%20%20%20%20%20%20%20%20%20%20%20%20%20%20%20%20%20%20%20%20%20%20%20%20%20%20%20%20%20%20%20%20%20%20%20%20%20%20%20%20%20%20%20%20%20%20%20%20%20%20%20%20%20%20%20%20%20%20%20…	http://www.genome.jp/kegg-bin/search_pathway_object?org_name=ko&amp;unclassified=%20%20%20%20%20%20%20%20%20%20%20%20%20%20%20%20%20%20%20%20%20%20%20%20%20%20%20%20%20%20%20%20%20%20%20%20%20%20%20%20%20%20%20%20%20%20%20%20%20%20%20%20%20%20%20%20%20%20%20%20%20%20%20%20%20%20%20%20%20%20%20%20%20%20%20%20%20%20%20%20%20%20%20%20%20%20%20%20%20%20%20%20%20%20%20%20%20%20%20%20%20%20%20%20%20%20…
210	ko04960	1.08574e-07	4.69129e-08	Organismal Systems	Excretory System	Aldosterone-regulated sodium reabsorption	0	1.09574e-07	4.79129e-08	2.28694	0.437265	2.28694	-2.31438	43	3	24	1	0	http://www.genome.jp/kegg-bin/search_pathway_object?org_name=ko&amp;unclassified=%20%20%20%20%20%20%20%20%20%20%20%20%20%20%20%20%20%20%20%20%20%20%20%20%20%20%20%20%20%20%20%20%20%20%20%20%20%20%20%20%20%20%20%20%20%20%20%20%20%20%20%20%20%20%20%20%20%20%20%20%20%20%20%20%20%20%20%20%20%20%20%20%20%20%20%20%20%20%20%20%20%20%20%20%20%20%20%20%20%20%20%20%20%20%20%20%20%20%20%20%20%20%20%20%20%20…	http://www.genome.jp/kegg-bin/search_pathway_object?org_name=ko&amp;unclassified=%20%20%20%20%20%20%20%20%20%20%20%20%20%20%20%20%20%20%20%20%20%20%20%20%20%20%20%20%20%20%20%20%20%20%20%20%20%20%20%20%20%20%20%20%20%20%20%20%20%20%20%20%20%20%20%20%20%20%20%20%20%20%20%20%20%20%20%20%20%20%20%20%20%20%20%20%20%20%20%20%20%20%20%20%20%20%20%20%20%20%20%20%20%20%20%20%20%20%20%20%20%20%20%20%20%20…
197	ko04961	1.18154e-07	4.69129e-08	Organismal Systems	Excretory System	Endocrine and other factor-regulated calcium reabsorption	0	1.19154e-07	4.79129e-08	2.48688	0.40211	2.48688	-2.51858	42	3	27	2	0	http://www.genome.jp/kegg-bin/search_pathway_object?org_name=ko&amp;unclassified=%20%20%20%20%20%20%20%20%20%20%20%20%20%20%20%20%20%20%20%20%20%20%20%20%20%20%20%20%20%20%20%20%20%20%20%20%20%20%20%20%20%20%20%20%20%20%20%20%20%20%20%20%20%20%20%20%20%20%20%20%20%20%20%20%20%20%20%20%20%20%20%20%20%20%20%20%20%20%20%20%20%20%20%20%20%20%20%20%20%20%20%20%20%20%20%20%20%20%20%20%20%20%20%20%20%20…	http://www.genome.jp/kegg-bin/search_pathway_object?org_name=ko&amp;unclassified=%20%20%20%20%20%20%20%20%20%20%20%20%20%20%20%20%20%20%20%20%20%20%20%20%20%20%20%20%20%20%20%20%20%20%20%20%20%20%20%20%20%20%20%20%20%20%20%20%20%20%20%20%20%20%20%20%20%20%20%20%20%20%20%20%20%20%20%20%20%20%20%20%20%20%20%20%20%20%20%20%20%20%20%20%20%20%20%20%20%20%20%20%20%20%20%20%20%20%20%20%20%20%20%20%20%20…
193	ko04972	1.24642e-07	5.49922e-08	Organismal Systems	Digestive System	Pancreatic secretion	0	1.25642e-07	5.59922e-08	2.24392	0.445648	2.24392	-2.26654	41	3	64	2	0	http://www.genome.jp/kegg-bin/search_pathway_object?org_name=ko&amp;unclassified=%20%20%20%20%20%20%20%20%20%20%20%20%20%20%20%20%20%20%20%20%20%20%20%20%20%20%20%20%20%20%20%20%20%20%20%20%20%20%20%20%20%20%20%20%20%20%20%20%20%20%20%20%20%20%20%20%20%20%20%20%20%20%20%20%20%20%20%20%20%20%20%20%20%20%20%20%20%20%20%20%20%20%20%20%20%20%20%20%20%20%20%20%20%20%20%20%20%20%20%20%20%20%20%20%20%20…	http://www.genome.jp/kegg-bin/search_pathway_object?org_name=ko&amp;unclassified=%20%20%20%20%20%20%20%20%20%20%20%20%20%20%20%20%20%20%20%20%20%20%20%20%20%20%20%20%20%20%20%20%20%20%20%20%20%20%20%20%20%20%20%20%20%20%20%20%20%20%20%20%20%20%20%20%20%20%20%20%20%20%20%20%20%20%20%20%20%20%20%20%20%20%20%20%20%20%20%20%20%20%20%20%20%20%20%20%20%20%20%20%20%20%20%20%20%20%20%20%20%20%20%20%20%20…
120	ko04916	1.36938e-07	2.98142e-08	Organismal Systems	Endocrine System	Melanogenesis	0	1.37938e-07	3.08142e-08	4.47644	0.223392	4.47644	-4.59305	40	3	64	1	0	http://www.genome.jp/kegg-bin/search_pathway_object?org_name=ko&amp;unclassified=%20%20%20%20%20%20%20%20%20%20%20%20%20%20%20%20%20%20%20%20%20%20%20%20%20%20%20%20%20%20%20%20%20%20%20%20%20%20%20%20%20%20%20%20%20%20%20%20%20%20%20%20%20%20%20%20%20%20%20%20%20%20%20%20%20%20%20%20%20%20%20%20%20%20%20%20%20%20%20%20%20%20%20%20%20%20%20%20%20%20%20%20%20%20%20%20%20%20%20%20%20%20%20%20%20%20…	http://www.genome.jp/kegg-bin/search_pathway_object?org_name=ko&amp;unclassified=%20%20%20%20%20%20%20%20%20%20%20%20%20%20%20%20%20%20%20%20%20%20%20%20%20%20%20%20%20%20%20%20%20%20%20%20%20%20%20%20%20%20%20%20%20%20%20%20%20%20%20%20%20%20%20%20%20%20%20%20%20%20%20%20%20%20%20%20%20%20%20%20%20%20%20%20%20%20%20%20%20%20%20%20%20%20%20%20%20%20%20%20%20%20%20%20%20%20%20%20%20%20%20%20%20%20…
283	ko00199	9.18024e-08	8.60075e-08	Metabolism	Enzyme Families	Cytochrome P450	0	9.28024e-08	8.70075e-08	1.0666	0.937557	1.0666	-1.06738	39	3	98	2	0	http://www.genome.jp/kegg-bin/search_pathway_object?org_name=ko&amp;unclassified=%20%20%20%20%20%20%20%20%20%20%20%20%20%20%20%20%20%20%20%20%20%20%20%20%20%20%20%20%20%20%20%20%20%20%20%20%20%20%20%20%20%20%20%20%20%20%20%20%20%20%20%20%20%20%20%20%20%20%20%20%20%20%20%20%20%20%20%20%20%20%20%20%20%20%20%20%20%20%20%20%20%20%20%20%20%20%20%20%20%20%20%20%20%20%20%20%20%20%20%20%20%20%20%20%20%20…	http://www.genome.jp/kegg-bin/search_pathway_object?org_name=ko&amp;unclassified=%20%20%20%20%20%20%20%20%20%20%20%20%20%20%20%20%20%20%20%20%20%20%20%20%20%20%20%20%20%20%20%20%20%20%20%20%20%20%20%20%20%20%20%20%20%20%20%20%20%20%20%20%20%20%20%20%20%20%20%20%20%20%20%20%20%20%20%20%20%20%20%20%20%20%20%20%20%20%20%20%20%20%20%20%20%20%20%20%20%20%20%20%20%20%20%20%20%20%20%20%20%20%20%20%20%20…
259	ko04330	5.33732e-08	2.41924e-07	Environmental Information Processing	Signal Transduction	Notch signaling pathway	0	5.43732e-08	2.42924e-07	0.223828	4.46773	-4.46773	4.5327	38	3	28	1	0	http://www.genome.jp/kegg-bin/search_pathway_object?org_name=ko&amp;unclassified=%20%20%20%20%20%20%20%20%20%20%20%20%20%20%20%20%20%20%20%20%20%20%20%20%20%20%20%20%20%20%20%20%20%20%20%20%20%20%20%20%20%20%20%20%20%20%20%20%20%20%20%20%20%20%20%20%20%20%20%20%20%20%20%20%20%20%20%20%20%20%20%20%20%20%20%20%20%20%20%20%20%20%20%20%20%20%20%20%20%20%20%20%20%20%20%20%20%20%20%20%20%20%20%20%20%20…	http://www.genome.jp/kegg-bin/search_pathway_object?org_name=ko&amp;unclassified=%20%20%20%20%20%20%20%20%20%20%20%20%20%20%20%20%20%20%20%20%20%20%20%20%20%20%20%20%20%20%20%20%20%20%20%20%20%20%20%20%20%20%20%20%20%20%20%20%20%20%20%20%20%20%20%20%20%20%20%20%20%20%20%20%20%20%20%20%20%20%20%20%20%20%20%20%20%20%20%20%20%20%20%20%20%20%20%20%20%20%20%20%20%20%20%20%20%20%20%20%20%20%20%20%20%20…
258	ko04310	5.33732e-08	2.41924e-07	Environmental Information Processing	Signal Transduction	Wnt signaling pathway	0	5.43732e-08	2.42924e-07	0.223828	4.46773	-4.46773	4.5327	37	3	97	1	0	http://www.genome.jp/kegg-bin/search_pathway_object?org_name=ko&amp;unclassified=%20%20%20%20%20%20%20%20%20%20%20%20%20%20%20%20%20%20%20%20%20%20%20%20%20%20%20%20%20%20%20%20%20%20%20%20%20%20%20%20%20%20%20%20%20%20%20%20%20%20%20%20%20%20%20%20%20%20%20%20%20%20%20%20%20%20%20%20%20%20%20%20%20%20%20%20%20%20%20%20%20%20%20%20%20%20%20%20%20%20%20%20%20%20%20%20%20%20%20%20%20%20%20%20%20%20…	http://www.genome.jp/kegg-bin/search_pathway_object?org_name=ko&amp;unclassified=%20%20%20%20%20%20%20%20%20%20%20%20%20%20%20%20%20%20%20%20%20%20%20%20%20%20%20%20%20%20%20%20%20%20%20%20%20%20%20%20%20%20%20%20%20%20%20%20%20%20%20%20%20%20%20%20%20%20%20%20%20%20%20%20%20%20%20%20%20%20%20%20%20%20%20%20%20%20%20%20%20%20%20%20%20%20%20%20%20%20%20%20%20%20%20%20%20%20%20%20%20%20%20%20%20%20…
260	ko05220	5.33732e-08	2.41924e-07	Human Diseases	Cancers	Chronic myeloid leukemia	0	5.43732e-08	2.42924e-07	0.223828	4.46773	-4.46773	4.5327	36	3	53	1	0	http://www.genome.jp/kegg-bin/search_pathway_object?org_name=ko&amp;unclassified=%20%20%20%20%20%20%20%20%20%20%20%20%20%20%20%20%20%20%20%20%20%20%20%20%20%20%20%20%20%20%20%20%20%20%20%20%20%20%20%20%20%20%20%20%20%20%20%20%20%20%20%20%20%20%20%20%20%20%20%20%20%20%20%20%20%20%20%20%20%20%20%20%20%20%20%20%20%20%20%20%20%20%20%20%20%20%20%20%20%20%20%20%20%20%20%20%20%20%20%20%20%20%20%20%20%20…	http://www.genome.jp/kegg-bin/search_pathway_object?org_name=ko&amp;unclassified=%20%20%20%20%20%20%20%20%20%20%20%20%20%20%20%20%20%20%20%20%20%20%20%20%20%20%20%20%20%20%20%20%20%20%20%20%20%20%20%20%20%20%20%20%20%20%20%20%20%20%20%20%20%20%20%20%20%20%20%20%20%20%20%20%20%20%20%20%20%20%20%20%20%20%20%20%20%20%20%20%20%20%20%20%20%20%20%20%20%20%20%20%20%20%20%20%20%20%20%20%20%20%20%20%20%20…
190	ko05410	2.13493e-07	1.07844e-07	Human Diseases	Cardiovascular Diseases	Hypertrophic cardiomyopathy (HCM)	0	2.14493e-07	1.08844e-07	1.97065	0.507446	1.97065	-1.97965	35	3	75	2	0	http://www.genome.jp/kegg-bin/search_pathway_object?org_name=ko&amp;unclassified=%20%20%20%20%20%20%20%20%20%20%20%20%20%20%20%20%20%20%20%20%20%20%20%20%20%20%20%20%20%20%20%20%20%20%20%20%20%20%20%20%20%20%20%20%20%20%20%20%20%20%20%20%20%20%20%20%20%20%20%20%20%20%20%20%20%20%20%20%20%20%20%20%20%20%20%20%20%20%20%20%20%20%20%20%20%20%20%20%20%20%20%20%20%20%20%20%20%20%20%20%20%20%20%20%20%20…	http://www.genome.jp/kegg-bin/search_pathway_object?org_name=ko&amp;unclassified=%20%20%20%20%20%20%20%20%20%20%20%20%20%20%20%20%20%20%20%20%20%20%20%20%20%20%20%20%20%20%20%20%20%20%20%20%20%20%20%20%20%20%20%20%20%20%20%20%20%20%20%20%20%20%20%20%20%20%20%20%20%20%20%20%20%20%20%20%20%20%20%20%20%20%20%20%20%20%20%20%20%20%20%20%20%20%20%20%20%20%20%20%20%20%20%20%20%20%20%20%20%20%20%20%20%20…
214	ko00901	1.91514e-07	9.17618e-08	Metabolism	Biosynthesis of Other Secondary Metabolites	Indole alkaloid biosynthesis	0	1.92514e-07	9.27618e-08	2.07536	0.481845	2.07536	-2.08708	34	3	10	2	0	http://www.genome.jp/kegg-bin/search_pathway_object?org_name=ko&amp;unclassified=%20%20%20%20%20%20%20%20%20%20%20%20%20%20%20%20%20%20%20%20%20%20%20%20%20%20%20%20%20%20%20%20%20%20%20%20%20%20%20%20%20%20%20%20%20%20%20%20%20%20%20%20%20%20%20%20%20%20%20%20%20%20%20%20%20%20%20%20%20%20%20%20%20%20%20%20%20%20%20%20%20%20%20%20%20%20%20%20%20%20%20%20%20%20%20%20%20%20%20%20%20%20%20%20%20%20…	http://www.genome.jp/kegg-bin/search_pathway_object?org_name=ko&amp;unclassified=%20%20%20%20%20%20%20%20%20%20%20%20%20%20%20%20%20%20%20%20%20%20%20%20%20%20%20%20%20%20%20%20%20%20%20%20%20%20%20%20%20%20%20%20%20%20%20%20%20%20%20%20%20%20%20%20%20%20%20%20%20%20%20%20%20%20%20%20%20%20%20%20%20%20%20%20%20%20%20%20%20%20%20%20%20%20%20%20%20%20%20%20%20%20%20%20%20%20%20%20%20%20%20%20%20%20…
280	ko05130	2.05972e-07	4.69845e-08	Human Diseases	Infectious Diseases	Pathogenic Escherichia coli infection	0	2.06972e-07	4.79845e-08	4.31331	0.23184	4.31331	-4.38383	33	3	38	9	0	http://www.genome.jp/kegg-bin/search_pathway_object?org_name=ko&amp;unclassified=%20%20%20%20%20%20%20%20%20%20%20%20%20%20%20%20%20%20%20%20%20%20%20%20%20%20%20%20%20%20%20%20%20%20%20%20%20%20%20%20%20%20%20%20%20%20%20%20%20%20%20%20%20%20%20%20%20%20%20%20%20%20%20%20%20%20%20%20%20%20%20%20%20%20%20%20%20%20%20%20%20%20%20%20%20%20%20%20%20%20%20%20%20%20%20%20%20%20%20%20%20%20%20%20%20%20…	http://www.genome.jp/kegg-bin/search_pathway_object?org_name=ko&amp;unclassified=%20%20%20%20%20%20%20%20%20%20%20%20%20%20%20%20%20%20%20%20%20%20%20%20%20%20%20%20%20%20%20%20%20%20%20%20%20%20%20%20%20%20%20%20%20%20%20%20%20%20%20%20%20%20%20%20%20%20%20%20%20%20%20%20%20%20%20%20%20%20%20%20%20%20%20%20%20%20%20%20%20%20%20%20%20%20%20%20%20%20%20%20%20%20%20%20%20%20%20%20%20%20%20%20%20%20…
63	ko00232	2.32403e-07	2.19534e-07	Metabolism	Biosynthesis of Other Secondary Metabolites	Caffeine metabolism	0	2.33403e-07	2.20534e-07	1.05836	0.944862	1.05836	-1.05862	32	3	8	3	0	http://www.genome.jp/kegg-bin/search_pathway_object?org_name=ko&amp;unclassified=%20%20%20%20%20%20%20%20%20%20%20%20%20%20%20%20%20%20%20%20%20%20%20%20%20%20%20%20%20%20%20%20%20%20%20%20%20%20%20%20%20%20%20%20%20%20%20%20%20%20%20%20%20%20%20%20%20%20%20%20%20%20%20%20%20%20%20%20%20%20%20%20%20%20%20%20%20%20%20%20%20%20%20%20%20%20%20%20%20%20%20%20%20%20%20%20%20%20%20%20%20%20%20%20%20%20…	http://www.genome.jp/kegg-bin/search_pathway_object?org_name=ko&amp;unclassified=%20%20%20%20%20%20%20%20%20%20%20%20%20%20%20%20%20%20%20%20%20%20%20%20%20%20%20%20%20%20%20%20%20%20%20%20%20%20%20%20%20%20%20%20%20%20%20%20%20%20%20%20%20%20%20%20%20%20%20%20%20%20%20%20%20%20%20%20%20%20%20%20%20%20%20%20%20%20%20%20%20%20%20%20%20%20%20%20%20%20%20%20%20%20%20%20%20%20%20%20%20%20%20%20%20%20…
265	ko04110	1.83321e-07	1.66797e-07	Cellular Processes	Cell Growth and Death	Cell cycle	0	1.84321e-07	1.67797e-07	1.09847	0.910353	1.09847	-1.09906	31	3	103	1	0	http://www.genome.jp/kegg-bin/search_pathway_object?org_name=ko&amp;unclassified=%20%20%20%20%20%20%20%20%20%20%20%20%20%20%20%20%20%20%20%20%20%20%20%20%20%20%20%20%20%20%20%20%20%20%20%20%20%20%20%20%20%20%20%20%20%20%20%20%20%20%20%20%20%20%20%20%20%20%20%20%20%20%20%20%20%20%20%20%20%20%20%20%20%20%20%20%20%20%20%20%20%20%20%20%20%20%20%20%20%20%20%20%20%20%20%20%20%20%20%20%20%20%20%20%20%20…	http://www.genome.jp/kegg-bin/search_pathway_object?org_name=ko&amp;unclassified=%20%20%20%20%20%20%20%20%20%20%20%20%20%20%20%20%20%20%20%20%20%20%20%20%20%20%20%20%20%20%20%20%20%20%20%20%20%20%20%20%20%20%20%20%20%20%20%20%20%20%20%20%20%20%20%20%20%20%20%20%20%20%20%20%20%20%20%20%20%20%20%20%20%20%20%20%20%20%20%20%20%20%20%20%20%20%20%20%20%20%20%20%20%20%20%20%20%20%20%20%20%20%20%20%20%20…
267	ko01056	3.40286e-07	1.61589e-07	Metabolism	Metabolism of Terpenoids and Polyketides	Biosynthesis of type II polyketide backbone	0	3.41286e-07	1.62589e-07	2.09907	0.476401	2.09907	-2.10587	30	3	10	5	0	http://www.genome.jp/kegg-bin/search_pathway_object?org_name=ko&amp;unclassified=%20%20%20%20%20%20%20%20%20%20%20%20%20%20%20%20%20%20%20%20%20%20%20%20%20%20%20%20%20%20%20%20%20%20%20%20%20%20%20%20%20%20%20%20%20%20%20%20%20%20%20%20%20%20%20%20%20%20%20%20%20%20%20%20%20%20%20%20%20%20%20%20%20%20%20%20%20%20%20%20%20%20%20%20%20%20%20%20%20%20%20%20%20%20%20%20%20%20%20%20%20%20%20%20%20%20…	http://www.genome.jp/kegg-bin/search_pathway_object?org_name=ko&amp;unclassified=%20%20%20%20%20%20%20%20%20%20%20%20%20%20%20%20%20%20%20%20%20%20%20%20%20%20%20%20%20%20%20%20%20%20%20%20%20%20%20%20%20%20%20%20%20%20%20%20%20%20%20%20%20%20%20%20%20%20%20%20%20%20%20%20%20%20%20%20%20%20%20%20%20%20%20%20%20%20%20%20%20%20%20%20%20%20%20%20%20%20%20%20%20%20%20%20%20%20%20%20%20%20%20%20%20%20…
119	ko00965	3.29511e-07	1.18925e-07	Metabolism	Biosynthesis of Other Secondary Metabolites	Betalain biosynthesis	0	3.30511e-07	1.19925e-07	2.75598	0.362847	2.75598	-2.77075	29	3	3	3	0	http://www.genome.jp/kegg-bin/search_pathway_object?org_name=ko&amp;unclassified=%20%20%20%20%20%20%20%20%20%20%20%20%20%20%20%20%20%20%20%20%20%20%20%20%20%20%20%20%20%20%20%20%20%20%20%20%20%20%20%20%20%20%20%20%20%20%20%20%20%20%20%20%20%20%20%20%20%20%20%20%20%20%20%20%20%20%20%20%20%20%20%20%20%20%20%20%20%20%20%20%20%20%20%20%20%20%20%20%20%20%20%20%20%20%20%20%20%20%20%20%20%20%20%20%20%20…	http://www.genome.jp/kegg-bin/search_pathway_object?org_name=ko&amp;unclassified=%20%20%20%20%20%20%20%20%20%20%20%20%20%20%20%20%20%20%20%20%20%20%20%20%20%20%20%20%20%20%20%20%20%20%20%20%20%20%20%20%20%20%20%20%20%20%20%20%20%20%20%20%20%20%20%20%20%20%20%20%20%20%20%20%20%20%20%20%20%20%20%20%20%20%20%20%20%20%20%20%20%20%20%20%20%20%20%20%20%20%20%20%20%20%20%20%20%20%20%20%20%20%20%20%20%20…
287	ko04512	2.94452e-07	3.75954e-07	Environmental Information Processing	Signaling Molecules and Interaction	ECM-receptor interaction	0	2.95452e-07	3.76954e-07	0.783787	1.27586	-1.27586	1.27679	28	3	56	2	0	http://www.genome.jp/kegg-bin/search_pathway_object?org_name=ko&amp;unclassified=%20%20%20%20%20%20%20%20%20%20%20%20%20%20%20%20%20%20%20%20%20%20%20%20%20%20%20%20%20%20%20%20%20%20%20%20%20%20%20%20%20%20%20%20%20%20%20%20%20%20%20%20%20%20%20%20%20%20%20%20%20%20%20%20%20%20%20%20%20%20%20%20%20%20%20%20%20%20%20%20%20%20%20%20%20%20%20%20%20%20%20%20%20%20%20%20%20%20%20%20%20%20%20%20%20%20…	http://www.genome.jp/kegg-bin/search_pathway_object?org_name=ko&amp;unclassified=%20%20%20%20%20%20%20%20%20%20%20%20%20%20%20%20%20%20%20%20%20%20%20%20%20%20%20%20%20%20%20%20%20%20%20%20%20%20%20%20%20%20%20%20%20%20%20%20%20%20%20%20%20%20%20%20%20%20%20%20%20%20%20%20%20%20%20%20%20%20%20%20%20%20%20%20%20%20%20%20%20%20%20%20%20%20%20%20%20%20%20%20%20%20%20%20%20%20%20%20%20%20%20%20%20%20…
194	ko04516	2.94452e-07	3.75954e-07	Environmental Information Processing	Signaling Molecules and Interaction	CAM ligands	0	2.95452e-07	3.76954e-07	0.783787	1.27586	-1.27586	1.27679	27	3	81	2	0	http://www.genome.jp/kegg-bin/search_pathway_object?org_name=ko&amp;unclassified=%20%20%20%20%20%20%20%20%20%20%20%20%20%20%20%20%20%20%20%20%20%20%20%20%20%20%20%20%20%20%20%20%20%20%20%20%20%20%20%20%20%20%20%20%20%20%20%20%20%20%20%20%20%20%20%20%20%20%20%20%20%20%20%20%20%20%20%20%20%20%20%20%20%20%20%20%20%20%20%20%20%20%20%20%20%20%20%20%20%20%20%20%20%20%20%20%20%20%20%20%20%20%20%20%20%20…	http://www.genome.jp/kegg-bin/search_pathway_object?org_name=ko&amp;unclassified=%20%20%20%20%20%20%20%20%20%20%20%20%20%20%20%20%20%20%20%20%20%20%20%20%20%20%20%20%20%20%20%20%20%20%20%20%20%20%20%20%20%20%20%20%20%20%20%20%20%20%20%20%20%20%20%20%20%20%20%20%20%20%20%20%20%20%20%20%20%20%20%20%20%20%20%20%20%20%20%20%20%20%20%20%20%20%20%20%20%20%20%20%20%20%20%20%20%20%20%20%20%20%20%20%20%20…
271	ko04510	3.13579e-07	3.79114e-07	Cellular Processes	Cell Communication	Focal adhesion	0	3.14579e-07	3.80114e-07	0.827593	1.20832	-1.20832	1.20899	26	3	133	4	0	http://www.genome.jp/kegg-bin/search_pathway_object?org_name=ko&amp;unclassified=%20%20%20%20%20%20%20%20%20%20%20%20%20%20%20%20%20%20%20%20%20%20%20%20%20%20%20%20%20%20%20%20%20%20%20%20%20%20%20%20%20%20%20%20%20%20%20%20%20%20%20%20%20%20%20%20%20%20%20%20%20%20%20%20%20%20%20%20%20%20%20%20%20%20%20%20%20%20%20%20%20%20%20%20%20%20%20%20%20%20%20%20%20%20%20%20%20%20%20%20%20%20%20%20%20%20…	http://www.genome.jp/kegg-bin/search_pathway_object?org_name=ko&amp;unclassified=%20%20%20%20%20%20%20%20%20%20%20%20%20%20%20%20%20%20%20%20%20%20%20%20%20%20%20%20%20%20%20%20%20%20%20%20%20%20%20%20%20%20%20%20%20%20%20%20%20%20%20%20%20%20%20%20%20%20%20%20%20%20%20%20%20%20%20%20%20%20%20%20%20%20%20%20%20%20%20%20%20%20%20%20%20%20%20%20%20%20%20%20%20%20%20%20%20%20%20%20%20%20%20%20%20%20…
264	ko04020	2.48372e-07	4.1491e-07	Environmental Information Processing	Signal Transduction	Calcium signaling pathway	0	2.49372e-07	4.1591e-07	0.59958	1.66783	-1.66783	1.67052	25	3	133	2	1	http://www.genome.jp/kegg-bin/search_pathway_object?org_name=ko&amp;unclassified=%20K07190%20%20%20%20%20%20%20%20%20%20%20%20%20%20%20%20%20%20%20%20%20%20%20%20%20%20%20%20%20%20%20%20%20%20%20%20%20%20%20%20%20%20%20%20%20%20%20%20%20%20%20%20%20%20%20%20%20%20%20%20%20%20%20%20%20%20%20%20%20%20%20%20%20%20%20%20%20%20%20%20%20%20%20%20%20%20%20%20%20%20%20%20%20%20%20%20%20%20%20%20%20%20%20…	http://www.genome.jp/kegg-bin/search_pathway_object?org_name=ko&amp;unclassified=%20K07190%20%20%20%20%20%20%20%20%20%20%20%20%20%20%20%20%20%20%20%20%20%20%20%20%20%20%20%20%20%20%20%20%20%20%20%20%20%20%20%20%20%20%20%20%20%20%20%20%20%20%20%20%20%20%20%20%20%20%20%20%20%20%20%20%20%20%20%20%20%20%20%20%20%20%20%20%20%20%20%20%20%20%20%20%20%20%20%20%20%20%20%20%20%20%20%20%20%20%20%20%20%20%20…	K07190
268	ko01057	2.23478e-07	3.63301e-07	Metabolism	Metabolism of Terpenoids and Polyketides	Biosynthesis of type II polyketide products	0	2.24478e-07	3.64301e-07	0.61619	1.62288	-1.62288	1.62566	24	3	18	8	0	http://www.genome.jp/kegg-bin/search_pathway_object?org_name=ko&amp;unclassified=%20%20%20%20%20%20%20%20%20%20%20%20%20%20%20%20%20%20%20%20%20%20%20%20%20%20%20%20%20%20%20%20%20%20%20%20%20%20%20%20%20%20%20%20%20%20%20%20%20%20%20%20%20%20%20%20%20%20%20%20%20%20%20%20%20%20%20%20%20%20%20%20%20%20%20%20%20%20%20%20%20%20%20%20%20%20%20%20%20%20%20%20%20%20%20%20%20%20%20%20%20%20%20%20%20%20…	http://www.genome.jp/kegg-bin/search_pathway_object?org_name=ko&amp;unclassified=%20%20%20%20%20%20%20%20%20%20%20%20%20%20%20%20%20%20%20%20%20%20%20%20%20%20%20%20%20%20%20%20%20%20%20%20%20%20%20%20%20%20%20%20%20%20%20%20%20%20%20%20%20%20%20%20%20%20%20%20%20%20%20%20%20%20%20%20%20%20%20%20%20%20%20%20%20%20%20%20%20%20%20%20%20%20%20%20%20%20%20%20%20%20%20%20%20%20%20%20%20%20%20%20%20%20…
301	ko05322	1.33173e-07	4.13006e-07	Human Diseases	Immune System Diseases	Systemic lupus erythematosus	0	1.34173e-07	4.14006e-07	0.324083	3.08563	-3.08563	3.10129	23	3	46	1	1	http://www.genome.jp/kegg-bin/search_pathway_object?org_name=ko&amp;unclassified=%20K11089%20%20%20%20%20%20%20%20%20%20%20%20%20%20%20%20%20%20%20%20%20%20%20%20%20%20%20%20%20%20%20%20%20%20%20%20%20%20%20%20%20%20%20%20%20%20%20%20%20%20%20%20%20%20%20%20%20%20%20%20%20%20%20%20%20%20%20%20%20%20%20%20%20%20%20%20%20%20%20%20%20%20%20%20%20%20%20%20%20%20%20%20%20%20%20%20%20%20%20%20%20%20%20…	http://www.genome.jp/kegg-bin/search_pathway_object?org_name=ko&amp;unclassified=%20K11089%20%20%20%20%20%20%20%20%20%20%20%20%20%20%20%20%20%20%20%20%20%20%20%20%20%20%20%20%20%20%20%20%20%20%20%20%20%20%20%20%20%20%20%20%20%20%20%20%20%20%20%20%20%20%20%20%20%20%20%20%20%20%20%20%20%20%20%20%20%20%20%20%20%20%20%20%20%20%20%20%20%20%20%20%20%20%20%20%20%20%20%20%20%20%20%20%20%20%20%20%20%20%20…	K11089
32	ko04976	6.05132e-07	3.65099e-07	Organismal Systems	Digestive System	Bile secretion	0	6.06132e-07	3.66099e-07	1.65565	0.603992	1.65565	-1.65745	22	3	58	3	0	http://www.genome.jp/kegg-bin/search_pathway_object?org_name=ko&amp;unclassified=%20%20%20%20%20%20%20%20%20%20%20%20%20%20%20%20%20%20%20%20%20%20%20%20%20%20%20%20%20%20%20%20%20%20%20%20%20%20%20%20%20%20%20%20%20%20%20%20%20%20%20%20%20%20%20%20%20%20%20%20%20%20%20%20%20%20%20%20%20%20%20%20%20%20%20%20%20%20%20%20%20%20%20%20%20%20%20%20%20%20%20%20%20%20%20%20%20%20%20%20%20%20%20%20%20%20…	http://www.genome.jp/kegg-bin/search_pathway_object?org_name=ko&amp;unclassified=%20%20%20%20%20%20%20%20%20%20%20%20%20%20%20%20%20%20%20%20%20%20%20%20%20%20%20%20%20%20%20%20%20%20%20%20%20%20%20%20%20%20%20%20%20%20%20%20%20%20%20%20%20%20%20%20%20%20%20%20%20%20%20%20%20%20%20%20%20%20%20%20%20%20%20%20%20%20%20%20%20%20%20%20%20%20%20%20%20%20%20%20%20%20%20%20%20%20%20%20%20%20%20%20%20%20…
281	ko05131	4.71228e-07	2.7699e-07	Human Diseases	Infectious Diseases	Shigellosis	0	4.72228e-07	2.7799e-07	1.69872	0.588677	1.69872	-1.70125	21	3	61	14	0	http://www.genome.jp/kegg-bin/search_pathway_object?org_name=ko&amp;unclassified=%20%20%20%20%20%20%20%20%20%20%20%20%20%20%20%20%20%20%20%20%20%20%20%20%20%20%20%20%20%20%20%20%20%20%20%20%20%20%20%20%20%20%20%20%20%20%20%20%20%20%20%20%20%20%20%20%20%20%20%20%20%20%20%20%20%20%20%20%20%20%20%20%20%20%20%20%20%20%20%20%20%20%20%20%20%20%20%20%20%20%20%20%20%20%20%20%20%20%20%20%20%20%20%20%20%20…	http://www.genome.jp/kegg-bin/search_pathway_object?org_name=ko&amp;unclassified=%20%20%20%20%20%20%20%20%20%20%20%20%20%20%20%20%20%20%20%20%20%20%20%20%20%20%20%20%20%20%20%20%20%20%20%20%20%20%20%20%20%20%20%20%20%20%20%20%20%20%20%20%20%20%20%20%20%20%20%20%20%20%20%20%20%20%20%20%20%20%20%20%20%20%20%20%20%20%20%20%20%20%20%20%20%20%20%20%20%20%20%20%20%20%20%20%20%20%20%20%20%20%20%20%20%20…
121	ko04978	1.86958e-06	1.36236e-06	Organismal Systems	Digestive System	Mineral absorption	0	1.87058e-06	1.36336e-06	1.37204	0.728843	1.37204	-1.37231	20	3	30	3	1	http://www.genome.jp/kegg-bin/search_pathway_object?org_name=ko&amp;unclassified=%20K07213%20%20%20%20%20%20%20%20%20%20%20%20%20%20%20%20%20%20%20%20%20%20%20%20%20%20%20%20%20%20%20%20%20%20%20%20%20%20%20%20%20%20%20%20%20%20%20%20%20%20%20%20%20%20%20%20%20%20%20%20%20%20%20%20%20%20%20%20%20%20%20%20%20%20%20%20%20%20%20%20%20%20%20%20%20%20%20%20%20%20%20%20%20%20%20%20%20%20%20%20%20%20%20…	http://www.genome.jp/kegg-bin/search_pathway_object?org_name=ko&amp;unclassified=%20K07213%20%20%20%20%20%20%20%20%20%20%20%20%20%20%20%20%20%20%20%20%20%20%20%20%20%20%20%20%20%20%20%20%20%20%20%20%20%20%20%20%20%20%20%20%20%20%20%20%20%20%20%20%20%20%20%20%20%20%20%20%20%20%20%20%20%20%20%20%20%20%20%20%20%20%20%20%20%20%20%20%20%20%20%20%20%20%20%20%20%20%20%20%20%20%20%20%20%20%20%20%20%20%20…	K07213
279	ko05110	1.7778e-06	1.37566e-06	Human Diseases	Infectious Diseases	Vibrio cholerae infection	0	1.7788e-06	1.37666e-06	1.29211	0.773926	1.29211	-1.29233	19	3	47	9	0	http://www.genome.jp/kegg-bin/search_pathway_object?org_name=ko&amp;unclassified=%20%20%20%20%20%20%20%20%20%20%20%20%20%20%20%20%20%20%20%20%20%20%20%20%20%20%20%20%20%20%20%20%20%20%20%20%20%20%20%20%20%20%20%20%20%20%20%20%20%20%20%20%20%20%20%20%20%20%20%20%20%20%20%20%20%20%20%20%20%20%20%20%20%20%20%20%20%20%20%20%20%20%20%20%20%20%20%20%20%20%20%20%20%20%20%20%20%20%20%20%20%20%20%20%20%20…	http://www.genome.jp/kegg-bin/search_pathway_object?org_name=ko&amp;unclassified=%20%20%20%20%20%20%20%20%20%20%20%20%20%20%20%20%20%20%20%20%20%20%20%20%20%20%20%20%20%20%20%20%20%20%20%20%20%20%20%20%20%20%20%20%20%20%20%20%20%20%20%20%20%20%20%20%20%20%20%20%20%20%20%20%20%20%20%20%20%20%20%20%20%20%20%20%20%20%20%20%20%20%20%20%20%20%20%20%20%20%20%20%20%20%20%20%20%20%20%20%20%20%20%20%20%20…
123	ko00945	1.95099e-06	1.42537e-06	Metabolism	Biosynthesis of Other Secondary Metabolites	Stilbenoid, diarylheptanoid and gingerol biosynthesis	0	1.95199e-06	1.42637e-06	1.36851	0.730724	1.36851	-1.36876	18	3	10	2	0	http://www.genome.jp/kegg-bin/search_pathway_object?org_name=ko&amp;unclassified=%20%20%20%20%20%20%20%20%20%20%20%20%20%20%20%20%20%20%20%20%20%20%20%20%20%20%20%20%20%20%20%20%20%20%20%20%20%20%20%20%20%20%20%20%20%20%20%20%20%20%20%20%20%20%20%20%20%20%20%20%20%20%20%20%20%20%20%20%20%20%20%20%20%20%20%20%20%20%20%20%20%20%20%20%20%20%20%20%20%20%20%20%20%20%20%20%20%20%20%20%20%20%20%20%20%20…	http://www.genome.jp/kegg-bin/search_pathway_object?org_name=ko&amp;unclassified=%20%20%20%20%20%20%20%20%20%20%20%20%20%20%20%20%20%20%20%20%20%20%20%20%20%20%20%20%20%20%20%20%20%20%20%20%20%20%20%20%20%20%20%20%20%20%20%20%20%20%20%20%20%20%20%20%20%20%20%20%20%20%20%20%20%20%20%20%20%20%20%20%20%20%20%20%20%20%20%20%20%20%20%20%20%20%20%20%20%20%20%20%20%20%20%20%20%20%20%20%20%20%20%20%20%20…
189	ko04614	1.35513e-06	1.94856e-06	Organismal Systems	Endocrine System	Renin-angiotensin system	0	1.35613e-06	1.94956e-06	0.695608	1.43759	-1.43759	1.43791	17	3	17	4	0	http://www.genome.jp/kegg-bin/search_pathway_object?org_name=ko&amp;unclassified=%20%20%20%20%20%20%20%20%20%20%20%20%20%20%20%20%20%20%20%20%20%20%20%20%20%20%20%20%20%20%20%20%20%20%20%20%20%20%20%20%20%20%20%20%20%20%20%20%20%20%20%20%20%20%20%20%20%20%20%20%20%20%20%20%20%20%20%20%20%20%20%20%20%20%20%20%20%20%20%20%20%20%20%20%20%20%20%20%20%20%20%20%20%20%20%20%20%20%20%20%20%20%20%20%20%20…	http://www.genome.jp/kegg-bin/search_pathway_object?org_name=ko&amp;unclassified=%20%20%20%20%20%20%20%20%20%20%20%20%20%20%20%20%20%20%20%20%20%20%20%20%20%20%20%20%20%20%20%20%20%20%20%20%20%20%20%20%20%20%20%20%20%20%20%20%20%20%20%20%20%20%20%20%20%20%20%20%20%20%20%20%20%20%20%20%20%20%20%20%20%20%20%20%20%20%20%20%20%20%20%20%20%20%20%20%20%20%20%20%20%20%20%20%20%20%20%20%20%20%20%20%20%20…
200	ko04640	9.85069e-07	1.7819e-06	Organismal Systems	Immune System	Hematopoietic cell lineage	0	9.86069e-07	1.7829e-06	0.553072	1.80808	-1.80808	1.8089	16	3	78	1	0	http://www.genome.jp/kegg-bin/search_pathway_object?org_name=ko&amp;unclassified=%20%20%20%20%20%20%20%20%20%20%20%20%20%20%20%20%20%20%20%20%20%20%20%20%20%20%20%20%20%20%20%20%20%20%20%20%20%20%20%20%20%20%20%20%20%20%20%20%20%20%20%20%20%20%20%20%20%20%20%20%20%20%20%20%20%20%20%20%20%20%20%20%20%20%20%20%20%20%20%20%20%20%20%20%20%20%20%20%20%20%20%20%20%20%20%20%20%20%20%20%20%20%20%20%20%20…	http://www.genome.jp/kegg-bin/search_pathway_object?org_name=ko&amp;unclassified=%20%20%20%20%20%20%20%20%20%20%20%20%20%20%20%20%20%20%20%20%20%20%20%20%20%20%20%20%20%20%20%20%20%20%20%20%20%20%20%20%20%20%20%20%20%20%20%20%20%20%20%20%20%20%20%20%20%20%20%20%20%20%20%20%20%20%20%20%20%20%20%20%20%20%20%20%20%20%20%20%20%20%20%20%20%20%20%20%20%20%20%20%20%20%20%20%20%20%20%20%20%20%20%20%20%20…
289	ko03041	1.47503e-06	1.01147e-05	Genetic Information Processing	Transcription	Spliceosome	0	1.47603e-06	1.01157e-05	0.145914	6.85336	-6.85336	6.85733	15	3	294	3	1	http://www.genome.jp/kegg-bin/search_pathway_object?org_name=ko&amp;unclassified=%20K12733%20%20%20%20%20%20%20%20%20%20%20%20%20%20%20%20%20%20%20%20%20%20%20%20%20%20%20%20%20%20%20%20%20%20%20%20%20%20%20%20%20%20%20%20%20%20%20%20%20%20%20%20%20%20%20%20%20%20%20%20%20%20%20%20%20%20%20%20%20%20%20%20%20%20%20%20%20%20%20%20%20%20%20%20%20%20%20%20%20%20%20%20%20%20%20%20%20%20%20%20%20%20%20…	http://www.genome.jp/kegg-bin/search_pathway_object?org_name=ko&amp;unclassified=%20K12733%20%20%20%20%20%20%20%20%20%20%20%20%20%20%20%20%20%20%20%20%20%20%20%20%20%20%20%20%20%20%20%20%20%20%20%20%20%20%20%20%20%20%20%20%20%20%20%20%20%20%20%20%20%20%20%20%20%20%20%20%20%20%20%20%20%20%20%20%20%20%20%20%20%20%20%20%20%20%20%20%20%20%20%20%20%20%20%20%20%20%20%20%20%20%20%20%20%20%20%20%20%20%20…	K12733
306	ko03040	1.46957e-06	1.01097e-05	Genetic Information Processing	Transcription	Spliceosome	0	1.47057e-06	1.01107e-05	0.145447	6.87534	-6.87534	6.87934	14	3	120	1	1	http://www.genome.jp/kegg-bin/search_pathway_object?org_name=ko&amp;unclassified=%20K12733%20%20%20%20%20%20%20%20%20%20%20%20%20%20%20%20%20%20%20%20%20%20%20%20%20%20%20%20%20%20%20%20%20%20%20%20%20%20%20%20%20%20%20%20%20%20%20%20%20%20%20%20%20%20%20%20%20%20%20%20%20%20%20%20%20%20%20%20%20%20%20%20%20%20%20%20%20%20%20%20%20%20%20%20%20%20%20%20%20%20%20%20%20%20%20%20%20%20%20%20%20%20%20…	http://www.genome.jp/kegg-bin/search_pathway_object?org_name=ko&amp;unclassified=%20K12733%20%20%20%20%20%20%20%20%20%20%20%20%20%20%20%20%20%20%20%20%20%20%20%20%20%20%20%20%20%20%20%20%20%20%20%20%20%20%20%20%20%20%20%20%20%20%20%20%20%20%20%20%20%20%20%20%20%20%20%20%20%20%20%20%20%20%20%20%20%20%20%20%20%20%20%20%20%20%20%20%20%20%20%20%20%20%20%20%20%20%20%20%20%20%20%20%20%20%20%20%20%20%20…	K12733
156	ko00565	3.00115e-05	1.17426e-05	Metabolism	Lipid Metabolism	Ether lipid metabolism	0	3.00125e-05	1.17436e-05	2.55564	0.391292	2.55564	-2.55577	13	3	17	5	0	http://www.genome.jp/kegg-bin/search_pathway_object?org_name=ko&amp;unclassified=%20%20%20%20%20%20%20%20%20%20%20%20%20%20%20%20%20%20%20%20%20%20%20%20%20%20%20%20%20%20%20%20%20%20%20%20%20%20%20%20%20%20%20%20%20%20%20%20%20%20%20%20%20%20%20%20%20%20%20%20%20%20%20%20%20%20%20%20%20%20%20%20%20%20%20%20%20%20%20%20%20%20%20%20%20%20%20%20%20%20%20%20%20%20%20%20%20%20%20%20%20%20%20%20%20%20…	http://www.genome.jp/kegg-bin/search_pathway_object?org_name=ko&amp;unclassified=%20%20%20%20%20%20%20%20%20%20%20%20%20%20%20%20%20%20%20%20%20%20%20%20%20%20%20%20%20%20%20%20%20%20%20%20%20%20%20%20%20%20%20%20%20%20%20%20%20%20%20%20%20%20%20%20%20%20%20%20%20%20%20%20%20%20%20%20%20%20%20%20%20%20%20%20%20%20%20%20%20%20%20%20%20%20%20%20%20%20%20%20%20%20%20%20%20%20%20%20%20%20%20%20%20%20…
125	ko00642	2.41948e-05	1.1591e-05	Metabolism	Xenobiotics Biodegradation and Metabolism	Ethylbenzene degradation	0	2.41958e-05	1.1592e-05	2.08728	0.479091	2.08728	-2.08738	12	3	16	12	0	http://www.genome.jp/kegg-bin/search_pathway_object?org_name=ko&amp;unclassified=%20%20%20%20%20%20%20%20%20%20%20%20%20%20%20%20%20%20%20%20%20%20%20%20%20%20%20%20%20%20%20%20%20%20%20%20%20%20%20%20%20%20%20%20%20%20%20%20%20%20%20%20%20%20%20%20%20%20%20%20%20%20%20%20%20%20%20%20%20%20%20%20%20%20%20%20%20%20%20%20%20%20%20%20%20%20%20%20%20%20%20%20%20%20%20%20%20%20%20%20%20%20%20%20%20%20…	http://www.genome.jp/kegg-bin/search_pathway_object?org_name=ko&amp;unclassified=%20%20%20%20%20%20%20%20%20%20%20%20%20%20%20%20%20%20%20%20%20%20%20%20%20%20%20%20%20%20%20%20%20%20%20%20%20%20%20%20%20%20%20%20%20%20%20%20%20%20%20%20%20%20%20%20%20%20%20%20%20%20%20%20%20%20%20%20%20%20%20%20%20%20%20%20%20%20%20%20%20%20%20%20%20%20%20%20%20%20%20%20%20%20%20%20%20%20%20%20%20%20%20%20%20%20…
253	ko05014	3.73871e-05	1.08807e-05	Human Diseases	Neurodegenerative Diseases	Amyotrophic lateral sclerosis (ALS)	0	3.73881e-05	1.08817e-05	3.43587	0.291047	3.43587	-3.43609	11	3	43	3	1	http://www.genome.jp/kegg-bin/search_pathway_object?org_name=ko&amp;unclassified=%20K03781%20%20%20%20%20%20%20%20%20%20%20%20%20%20%20%20%20%20%20%20%20%20%20%20%20%20%20%20%20%20%20%20%20%20%20%20%20%20%20%20%20%20%20%20%20%20%20%20%20%20%20%20%20%20%20%20%20%20%20%20%20%20%20%20%20%20%20%20%20%20%20%20%20%20%20%20%20%20%20%20%20%20%20%20%20%20%20%20%20%20%20%20%20%20%20%20%20%20%20%20%20%20%20…	http://www.genome.jp/kegg-bin/search_pathway_object?org_name=ko&amp;unclassified=%20K03781%20%20%20%20%20%20%20%20%20%20%20%20%20%20%20%20%20%20%20%20%20%20%20%20%20%20%20%20%20%20%20%20%20%20%20%20%20%20%20%20%20%20%20%20%20%20%20%20%20%20%20%20%20%20%20%20%20%20%20%20%20%20%20%20%20%20%20%20%20%20%20%20%20%20%20%20%20%20%20%20%20%20%20%20%20%20%20%20%20%20%20%20%20%20%20%20%20%20%20%20%20%20%20…	K03781
205	ko00312	2.22214e-05	3.63999e-05	Metabolism	Biosynthesis of Other Secondary Metabolites	beta-Lactam resistance	0	2.22224e-05	3.64009e-05	0.610491	1.63803	-1.63803	1.63806	10	3	7	6	1	http://www.genome.jp/kegg-bin/search_pathway_object?org_name=ko&amp;unclassified=%20K01467%20%20%20%20%20%20%20%20%20%20%20%20%20%20%20%20%20%20%20%20%20%20%20%20%20%20%20%20%20%20%20%20%20%20%20%20%20%20%20%20%20%20%20%20%20%20%20%20%20%20%20%20%20%20%20%20%20%20%20%20%20%20%20%20%20%20%20%20%20%20%20%20%20%20%20%20%20%20%20%20%20%20%20%20%20%20%20%20%20%20%20%20%20%20%20%20%20%20%20%20%20%20%20…	http://www.genome.jp/kegg-bin/search_pathway_object?org_name=ko&amp;unclassified=%20K01467%20%20%20%20%20%20%20%20%20%20%20%20%20%20%20%20%20%20%20%20%20%20%20%20%20%20%20%20%20%20%20%20%20%20%20%20%20%20%20%20%20%20%20%20%20%20%20%20%20%20%20%20%20%20%20%20%20%20%20%20%20%20%20%20%20%20%20%20%20%20%20%20%20%20%20%20%20%20%20%20%20%20%20%20%20%20%20%20%20%20%20%20%20%20%20%20%20%20%20%20%20%20%20…	K01467
117	ko05143	5.20268e-06	0.000148857	Human Diseases	Infectious Diseases	African trypanosomiasis	0	5.20368e-06	0.000148858	0.0349574	28.6062	-28.6062	28.6115	9	3	35	4	2	http://www.genome.jp/kegg-bin/search_pathway_object?org_name=ko&amp;unclassified=%20K01354%20K14475%20%20%20%20%20%20%20%20%20%20%20%20%20%20%20%20%20%20%20%20%20%20%20%20%20%20%20%20%20%20%20%20%20%20%20%20%20%20%20%20%20%20%20%20%20%20%20%20%20%20%20%20%20%20%20%20%20%20%20%20%20%20%20%20%20%20%20%20%20%20%20%20%20%20%20%20%20%20%20%20%20%20%20%20%20%20%20%20%20%20%20%20%20%20%20%20%20%20%20%20…	http://www.genome.jp/kegg-bin/search_pathway_object?org_name=ko&amp;unclassified=%20K01354%20K14475%20%20%20%20%20%20%20%20%20%20%20%20%20%20%20%20%20%20%20%20%20%20%20%20%20%20%20%20%20%20%20%20%20%20%20%20%20%20%20%20%20%20%20%20%20%20%20%20%20%20%20%20%20%20%20%20%20%20%20%20%20%20%20%20%20%20%20%20%20%20%20%20%20%20%20%20%20%20%20%20%20%20%20%20%20%20%20%20%20%20%20%20%20%20%20%20%20%20%20%20…	K01354	K14475
191	ko05142	4.53949e-06	0.000148739	Human Diseases	Infectious Diseases	Chagas disease (American trypanosomiasis)	0	4.54049e-06	0.00014874	0.0305263	32.7586	-32.7586	32.7656	8	3	82	2	1	http://www.genome.jp/kegg-bin/search_pathway_object?org_name=ko&amp;unclassified=%20K01354%20%20%20%20%20%20%20%20%20%20%20%20%20%20%20%20%20%20%20%20%20%20%20%20%20%20%20%20%20%20%20%20%20%20%20%20%20%20%20%20%20%20%20%20%20%20%20%20%20%20%20%20%20%20%20%20%20%20%20%20%20%20%20%20%20%20%20%20%20%20%20%20%20%20%20%20%20%20%20%20%20%20%20%20%20%20%20%20%20%20%20%20%20%20%20%20%20%20%20%20%20%20%20…	http://www.genome.jp/kegg-bin/search_pathway_object?org_name=ko&amp;unclassified=%20K01354%20%20%20%20%20%20%20%20%20%20%20%20%20%20%20%20%20%20%20%20%20%20%20%20%20%20%20%20%20%20%20%20%20%20%20%20%20%20%20%20%20%20%20%20%20%20%20%20%20%20%20%20%20%20%20%20%20%20%20%20%20%20%20%20%20%20%20%20%20%20%20%20%20%20%20%20%20%20%20%20%20%20%20%20%20%20%20%20%20%20%20%20%20%20%20%20%20%20%20%20%20%20%20…	K01354
248	ko03050	1.71557e-06	8.43155e-05	Genetic Information Processing	Folding, Sorting and Degradation	Proteasome	0	1.71657e-06	8.43165e-05	0.0203586	49.1192	-49.1192	49.1472	7	3	48	4	2	http://www.genome.jp/kegg-bin/search_pathway_object?org_name=ko&amp;unclassified=%20K03420%20K13527%20%20%20%20%20%20%20%20%20%20%20%20%20%20%20%20%20%20%20%20%20%20%20%20%20%20%20%20%20%20%20%20%20%20%20%20%20%20%20%20%20%20%20%20%20%20%20%20%20%20%20%20%20%20%20%20%20%20%20%20%20%20%20%20%20%20%20%20%20%20%20%20%20%20%20%20%20%20%20%20%20%20%20%20%20%20%20%20%20%20%20%20%20%20%20%20%20%20%20%20…	http://www.genome.jp/kegg-bin/search_pathway_object?org_name=ko&amp;unclassified=%20K03420%20K13527%20%20%20%20%20%20%20%20%20%20%20%20%20%20%20%20%20%20%20%20%20%20%20%20%20%20%20%20%20%20%20%20%20%20%20%20%20%20%20%20%20%20%20%20%20%20%20%20%20%20%20%20%20%20%20%20%20%20%20%20%20%20%20%20%20%20%20%20%20%20%20%20%20%20%20%20%20%20%20%20%20%20%20%20%20%20%20%20%20%20%20%20%20%20%20%20%20%20%20%20…	K03420	K13527
79	ko00240	0.0328114	0.0284812	Metabolism	Nucleotide Metabolism	Pyrimidine metabolism	0	0.0328114	0.0284812	1.15204	0.868027	1.15204	-1.15204	6	4	153	100	40	http://www.genome.jp/kegg-bin/search_pathway_object?org_name=ko&amp;unclassified=%20K00226%20K00609%20K00610%20K00756%20K00757%20K00758%20K00761%20K00762%20K00876%20K00940%20K00943%20K00945%20K01464%20K01465%20K01485%20K01489%20K01493%20K01494%20K01520%20K01591%20K01937%20K01956%20K02322%20K02335%20K02337%20K02338%20K02340%20K02341%20K02342%20K02343%20K02825%20K03043%20K03048%20K03060%20K03465%20…	http://www.genome.jp/kegg-bin/search_pathway_object?org_name=ko&amp;unclassified=%20K00226%20K00609%20K00610%20K00756%20K00757%20K00758%20K00761%20K00762%20K00876%20K00940%20K00943%20K00945%20K01464%20K01465%20K01485%20K01489%20K01493%20K01494%20K01520%20K01591%20K01937%20K01956%20K02322%20K02335%20K02337%20K02338%20K02340%20K02341%20K02342%20K02343%20K02825%20K03043%20K03048%20K03060%20K03465%20…	K00226	K00609	K00610	K00756	K00757	K00758	K00761	K00762	K00876	K00940	K00943	K00945	K01464	K01465	K01485	K01489	K01493	K01494	K01520	K01591	K01937	K01956	K02322	K02335	K02337	K02338	K02340	K02341	K02342
136	ko01007	0.0323015	0.0287461	Metabolism	Amino Acid Metabolism	Amino acid related enzymes	1	0.0323015	0.0287461	1.12369	0.889928	1.12369	-1.12369	5	4	104	84	38	http://www.genome.jp/kegg-bin/search_pathway_object?org_name=ko&amp;unclassified=%20K00639%20K00652%20K00817%20K00818%20K00819%20K00821%20K00823%20K00826%20K00830%20K00831%20K00832%20K00833%20K01866%20K01867%20K01872%20K01874%20K01878%20K01879%20K01880%20K01883%20K01884%20K01885%20K01887%20K01890%20K01892%20K01893%20K03430%20K07250%20K08969%20K09251%20K09469%20K09698%20K10206%20K10907%20K11358%20…	http://www.genome.jp/kegg-bin/search_pathway_object?org_name=ko&amp;unclassified=%20K00639%20K00652%20K00817%20K00818%20K00819%20K00821%20K00823%20K00826%20K00830%20K00831%20K00832%20K00833%20K01866%20K01867%20K01872%20K01874%20K01878%20K01879%20K01880%20	K00639	K00652	K00817	K00818	K00819	K00821	K00823	K00826	K00830	K00831	K00832	K00833	K01866	K01867	K01872	K01874	K01878	K01879	K01880	K01883	K01884	K01885	K01887	K01890	K01892	K01893	K03430	K07250	K08969
138	ko00970	0.0284529	0.0238391	Genetic Information Processing	Translation	Aminoacyl-tRNA biosynthesis	0	0.0284529	0.0238391	1.19354	0.837846	1.19354	-1.19354	4	4	64	41	20	http://www.genome.jp/kegg-bin/search_pathway_object?org_name=ko&amp;unclassified=%20K00604%20K01042%20K01866%20K01867%20K01872%20K01874%20K01878%20K01879%20K01880%20K01883%20K01884%20K01885%20K01887%20K01890%20K01892%20K01893%20K02433%20K02434%20K02435%20K09698%20%20%20%20%20%20%20%20%20%20%20%20%20%20%20%20%20%20%20%20%20%20%20%20%20%20%20%20%20%20%20%20%20%20%20%20%20%20%20%20%20%20%20%20%20%20…	http://www.genome.jp/kegg-bin/search_pathway_object?org_name=ko&amp;unclassified=%20K00604%20K01042%20K01866%20K01867%20K01872%20K01874%20K01878%20K01879%20K01880%20K01883%20K01884%20K01885%20K01887%20K01890%20K01892%20K01893%20K02433%20K02434%20K02435%20K09698%20%20%20%20%20%20%20%20%20%20%20%20%20%20%20%20%20%20%20%20%20%20%20%20%20%20%20%20%20%20%20%20%20%20%20%20%20%20%20%20%20%20%20%20%20%20…	K00604	K01042	K01866	K01867	K01872	K01874	K01878	K01879	K01880	K01883	K01884	K01885	K01887	K01890	K01892	K01893	K02433	K02434	K02435	K09698
224	ko02000	0.0319357	0.0362242	Environmental Information Processing	Membrane Transport	Transporters	0	0.0319357	0.0362242	0.881611	1.13429	-1.13429	1.13429	3	4	606	528	151	http://www.genome.jp/kegg-bin/search_pathway_object?org_name=ko&amp;unclassified=%20K01999%20K02000%20K02003,ko:K02004%20K02004%20K02006%20K02007%20K02008%20K02009%20K02010%20K02012%20K02015%20K02017%20K02018%20K02020%20K02028%20K02029%20K02030%20K02031,ko:K02032%20K02031,ko:K02034%20K02035%20K02040%20K02041%20K02042%20K02044%20K02045%20K02046%20K02047%20K02048%20K02051%20K02056%20K02057%20K02059…	http://www.genome.jp/kegg-bin/search_pathway_object?org_name=ko&amp;unclassified=%20K01999%20K02000%20K02003,ko:K02004%20K02004%20K02006%20K02007%20K02008%20K02009%20K02010%20K02012%20K02015%20K02017%20K02018%20K02020%20K02028%20K02029%20K02030%20K02031,ko:K02032%20K02031,ko:K02034%20K02035%20K02040%20K02041%20K02042%20K02044%20K02045%20K02046%20K02047%20K02048%20K02051%20K02056%20K02057%20K02059…	K01999	K02000	K02003,ko:K02004	K02004	K02006	K02007	K02008	K02009	K02010	K02012	K02015	K02017	K02018	K02020	K02028	K02029	K02030	K02031,ko:K02032	K02031,ko:K02034	K02035	K02040	K02041	K02042	K02044	K02045	K02046	K02047	K02048	K02051
124	ko03400	0.0469937	0.0440383	Genetic Information Processing	Replication and Repair	DNA repair and recombination proteins	0	0.0469937	0.0440383	1.06711	0.937109	1.06711	-1.06711	2	4	300	127	51	http://www.genome.jp/kegg-bin/search_pathway_object?org_name=ko&amp;unclassified=%20K00567%20K01159%20K01247%20K01356%20K01520%20K01972%20K02335%20K02337%20K02338%20K02340%20K02341%20K02342%20K02343%20K02346%20K03043%20K03048%20K03060%20K03111%20K03168%20K03503%20K03546%20K03547%20K03550%20K03572%20K03574%20K03575%20K03584%20K03601%20K03602%20K03629%20K03631%20K03648%20K03652%20K03654%20K03655%20…	http://www.genome.jp/kegg-bin/search_pathway_object?org_name=ko&amp;unclassified=%20K00567%20K01159%20K01247%20K01356%20K01520%20K01972%20K02335%20K02337%20K02338%20K02340%20K02341%20K02342%20K02343%20K02346%20K03043%20K03048%20K03060%20K03111%20K03168%20K03503%20K03546%20K03547%20K03550%20K03572%20K03574%20K03575%20K03584%20K03601%20K03602%20K03629%20K03631%20K03648%20K03652%20K03654%20K03655%20…	K00567	K01159	K01247	K01356	K01520	K01972	K02335	K02337	K02338	K02340	K02341	K02342	K02343	K02346	K03043	K03048	K03060	K03111	K03168	K03503	K03546	K03547	K03550	K03572	K03574	K03575	K03584	K03601	K03602
52	ko00230	0.0421845	0.0366895	Metabolism	Nucleotide Metabolism	Purine metabolism	0	0.0421845	0.0366895	1.14977	0.869738	1.14977	-1.14977	1	4	241	153	50	http://www.genome.jp/kegg-bin/search_pathway_object?org_name=ko&amp;unclassified=%20K00087%20K00602%20K00759%20K00760%20K00860%20K00873%20K00939%20K00940%20K00942%20K00951%20K00956%20K00958%20K01139%20K01239%20K01241%20K01428%20K01429%20K01430%20K01486%20K01487%20K01492%20K01515%20K01524%20K01525%20K01589%20K01923%20K01933%20K01939%20K01951%20K01952%20K02322%20K02335%20K02337%20K02338%20K02340%20…	http://www.genome.jp/kegg-bin/search_pathway_object?org_name=ko&amp;unclassified=%20K00087%20K00602%20K00759%20K00760%20K00860%20K00873%20K00939%20K00940%20K00942%20K00951%20K00956%20K00958%20K01139%20K01239%20K01241%20K01428%20K01429%20K01430%20K01486%20K01487%20K01492%20K01515%20K01524%20K01525%20K01589%20K01923%20K01933%20K01939%20K01951%20K01952%20K02322%20K02335%20K02337%20K02338%20K02340%20…	K00087	K00602	K00759	K00760	K00860	K00873	K00939	K00940	K00942	K00951	K00956	K00958	K01139	K01239	K01241	K01428	K01429	K01430	K01486	K01487	K01492	K01515	K01524	K01525	K01589	K01923	K01933	K01939	K01951
[truncated: 122 more columns]
